# Supplementary material for: Stereoselective radical C–H alkylation with acceptor/acceptor-substituted diazo reagents via Co(ii)-based metalloradical catalysis
Source: Royal Society of Chemistry journal article supplement (doi:10.1039/c4sc02610a), 2014-11-19
Supplement: c4sc02610a1.pdf [file c4sc02610a1.pdf]

## Supporting Information

### **Stereoselective Radical C–H Alkylation with Acceptor/Acceptor-Substituted Diazo Reagents via Co(II)-Based Metalloradical Catalysis**

Xin Cui, Xue Xu, Li-Mei Jin, Lukasz Wojtas, and X. Peter Zhang\*

Department of Chemistry, University of South Florida, Tampa, Florida 33620-5250

**General Considerations.** All C-H alkylation reactions were carried out under a nitrogen atmosphere in oven-dried glassware following standard Schlenk techniques. Anhydrous benzene and other reagents were direct used as purchased from Aldrich. Thin layer chromatography was performed on Merck TLC plates (silica gel 60 F254). Flash column chromatography was performed with ICN silica gel (60 Å, 230-400 mesh, 32-63 μm). Proton and carbon nuclear magnetic resonance spectra (<sup>1</sup>H NMR and <sup>13</sup>C NMR) were recorded on a Bruker250 (250 MHz) or Varian Inova600 (600 MHz) instruments with chemical shifts reported relative to residual solvent. HPLC measurements were carried out on a Shimadzu HPLC system with Whelk-O1, Chiralcel OD-H, OJ-H, and AD-H columns. HRMS data was obtained on an Agilent 1100 LC/MS ESI/TOF mass spectrometer with electrospray ionization.

### Catalyst Synthesis:

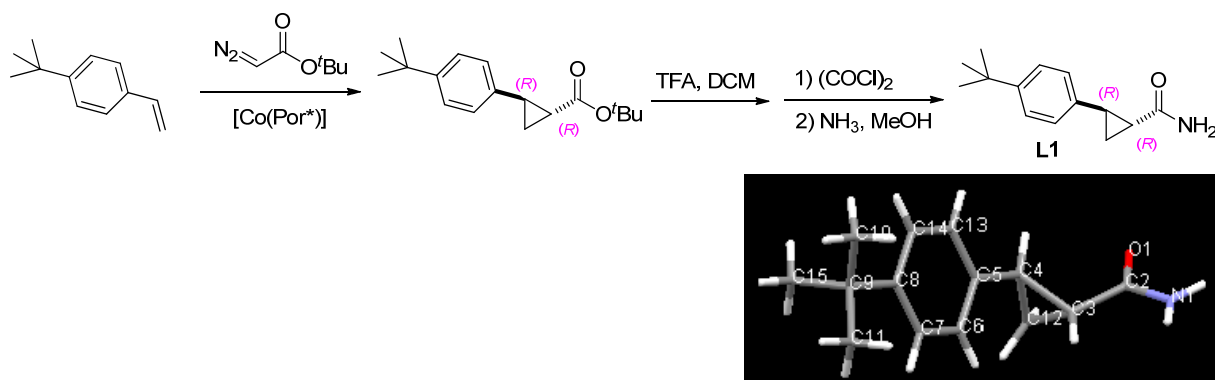

**(1R,2R)-2-(4-(tert-butyl)phenyl)cyclopropanecarboxamide (L1)** were synthesized according to our previous reported procedure with 97% ee.<sup>1,2</sup> After recrystallization the ee was improved to no less than 99%.<sup>2</sup> [1R,2R] absolute configuration was determined by anomalous-dispersion effects in X-ray diffraction measurements on crystal.

$[\alpha]_D^{20} = -26.115$  ( $c = 1$ ,  $\text{CHCl}_3$ ). <sup>1</sup>H NMR (500 MHz,  $\text{CDCl}_3$ )  $\delta$  7.32 (d,  $J = 8.34$  Hz, 2H), 7.06 (d,  $J = 8.33$  Hz, 2H), 5.73 (br, 2H), 2.54-2.45 (m, 1H), 1.70-1.65 (m, 1H), 1.64-1.60 (m, 1H), 1.31 (s, 9H), 1.30-1.28 (m, 1H). <sup>13</sup>C NMR (125 MHz,  $\text{CDCl}_3$ )  $\delta$  174.609 (C), 149.414(C), 137.457(C), 125.735(CH), 125.394(CH), 34.418(C), 31.342(CH3), 25.871(CH), 25.353(CH), 16.219(CH2). HRMS (ESI) ( $[\text{M}+\text{H}]^+$ ) Calcd. for  $\text{C}_{14}\text{H}_{20}\text{NO}$ : 218.1539, Found 218.1531. IR (neat,  $\text{cm}^{-1}$ ): 3403.60, 1645.76, 1423.86, 822.32, 562.68. HPLC analysis: ee = 99%. OD-H (90% hexanes: 10% isopropanol, 1.0 mL/min):  $t_{\text{major}} = 8.8$  min,  $t_{\text{minor}} = 13.7$  min.

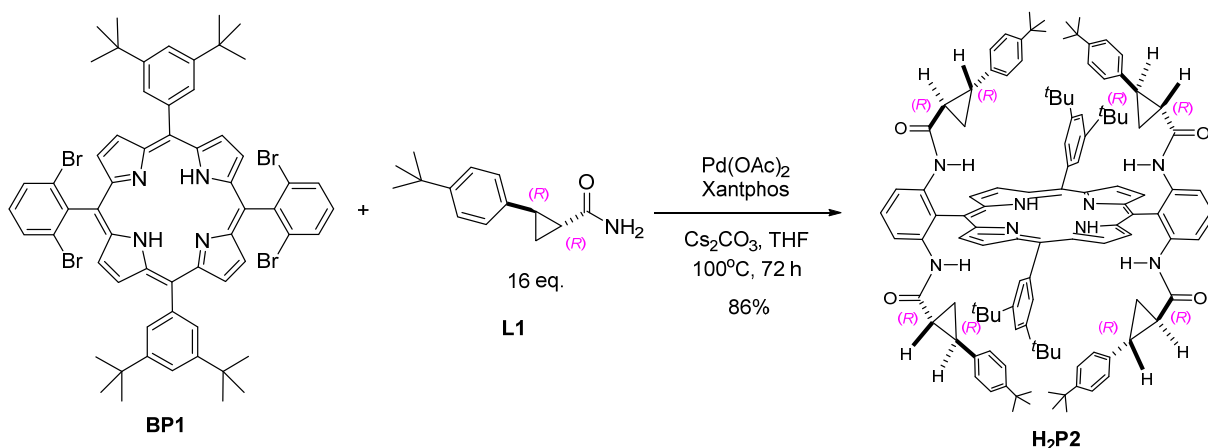

[H<sub>2</sub>(**P2**)] were synthesized according to our previous reported procedure<sup>3</sup> with 86% yield. The 5,15-bis(2,6-dibromophenyl)-10,20-bis(3,5-di-*tert*-butylphenyl)-porphyrin **BP1**<sup>3</sup> (0.1 mmol), chiral amide **L1** (1.6 mmol), Pd(OAc)<sub>2</sub> (0.04 mmol), Xantphos (0.08 mmol), and Cs<sub>2</sub>CO<sub>3</sub> (1.6 mmol) were placed in an oven-dried, resealable Schlenk tube. The tube was capped with a Teflon screwcap, evacuated, and backfilled with nitrogen. The screwcap was replaced with a rubber septum, and THF was added via syringe. The tube was purged with nitrogen for 2 min, and then the septum was replaced with the Teflon screwcap. The tube was sealed, and its contents were heated with stirring. The resulting mixture was cooled to room temperature, taken up in ethyl acetate and concentrated *in vacuo*. The crude product was then purified by flash chromatography with hexanes/EtOAc (4:1) as an eluent (*R<sub>f</sub>* = 0.3). <sup>1</sup>H NMR (250 MHz, CDCl<sub>3</sub>): δ 9.06 (d, *J* = 4.61 Hz, 4H), 8.90 (d, *J* = 4.37 Hz, 4H), 8.63 (br, 4H), 8.05 (s, 4H), 7.91 (t, *J* = 8.25 Hz, 2H), 7.86 (s, 2H), 6.64 (br, 8H), 6.59 (s, 4H), 6.25 (br, 8H), 2.29-2.22 (m, 4H), 1.53 (s, 36H), 1.34-1.25 (m, 4H), 0.95 (s, 36H), 0.59 (br, 4H), 0.18 (br, 4H), -2.49 (s, 2H). <sup>13</sup>C NMR (62.5 MHz, CDCl<sub>3</sub>): δ 170.290, 149.346, 149.049, 139.752, 139.266, 136.530, 133.845, 130.482, 130.224, 125.629, 124.968, 124.762, 123.125, 121.755, 117.457, 107.859, 35.130, 34.053, 31.757, 31.070, 29.793, 26.500, 25.591, 15.773. HRMS (ESI) ([*M*+*H*]<sup>+</sup>) Calcd. for C<sub>116</sub>H<sub>131</sub>N<sub>8</sub>O<sub>4</sub>: 1701.0320, Found 1701.0375. UV-vis (CH<sub>2</sub>Cl<sub>2</sub>), λ<sub>max</sub> nm (log ε): 423(5.25), 518(4.17), 552(3.74), 591(3.66), 649(3.74).

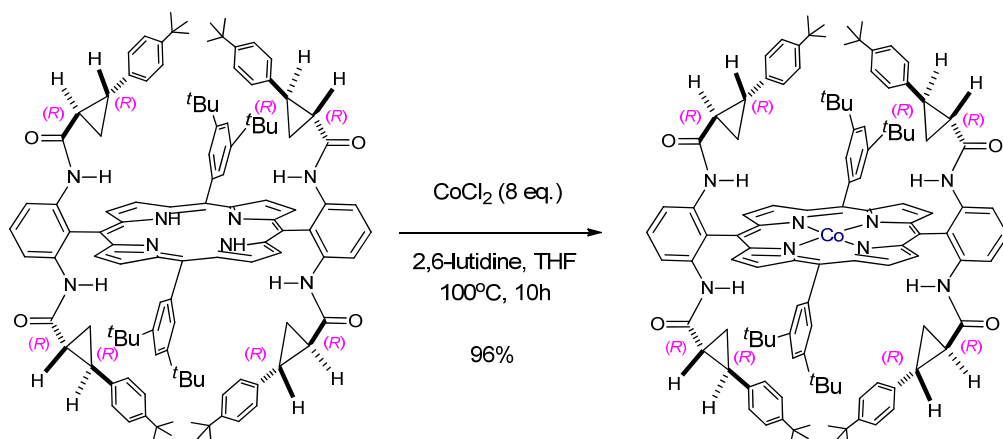

[Co(P2)] were synthesized according to our previous reported procedure<sup>3</sup> with 96% yield. Free base porphyrin [H<sub>2</sub>(P2)] and anhydrous CoCl<sub>2</sub> (8 equiv) were placed in an oven-dried, resealable Schlenk tube. The tube was capped with a Teflon screwcap, evacuated, and backfilled with nitrogen. The screwcap was replaced with a rubber septum, 2,6-lutidine (8 equiv) and anhydrous THF were added via syringe. The tube was purged with nitrogen for 2 minutes, and then the septum was replaced with the Teflon screwcap. The tube was sealed, and its contents were heated with stirring. The resulting mixture was cooled to room temperature, taken up in ethyl acetate, and transferred to a separatory funnel. The mixture was washed with water 3 times and product was then purified by flash chromatography with hexanes/EtOAc (2:1) as an eluent (R<sub>f</sub> = 0.6). HRMS (ESI) (M<sup>+</sup>) Calcd. for C<sub>116</sub>H<sub>128</sub>CoN<sub>8</sub>O<sub>4</sub>: 1756.9418, Found 1756.9430. UV-vis (CH<sub>2</sub>Cl<sub>2</sub>), λ<sub>max</sub> nm (log ε): 415(5.17), 531(4.06).

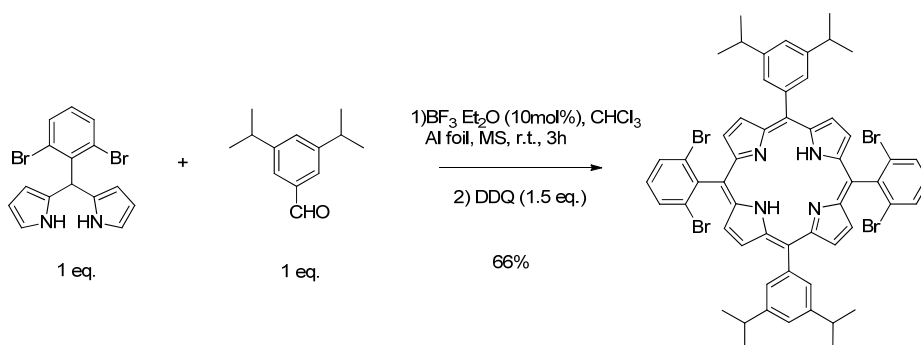

**3,5-diisopropylbenzaldehyde** was synthesized according to previous reported procedure.<sup>4</sup>

**5,15-Bis(2,6-dibromophenyl)-10,20-bis(3,5-diisopropylphenyl)porphyrin** were synthesized according to our previous reported procedure<sup>3</sup> with 66% yield. A mixture of meso-(2,6-dibromophenyl)dipyrromethane<sup>3</sup> (5 mmol), 3,5-diisopropylbenzaldehyde (5 mmol) in chloroform (1L) was purged with nitrogen for 10 min. Boron trifluoride diethyl etherate (0.5 mL) was added dropwise via a syringe and the flask was wrapped with aluminum foil to shield it from light. The solution was stirred under a nitrogen atmosphere at room temperature for 3 h, and 2,3-dichloro-5,6-dicyano-1,4-benzoquinone (DDQ) (6 mmol) was added as powder at one time. After 1h, 10 mL of triethylamine was added. The reaction solution was then directly poured on the top of a silica gel column that was packed with dichloromethane. The column was eluted with dichloromethane. The fractions containing product were collected and concentrated on a rotary evaporator. The residue was washed several times with hexanes to afford the pure compound. <sup>1</sup>H NMR (250 MHz, CDCl<sub>3</sub>): δ 8.93 (d, *J* = 4.75 Hz, 4H), 8.67 (d, *J* = 4.82 Hz, 4H), 8.06 (d, *J* = 8.06 Hz, 4H), 7.96 (d, *J* = 1.44 Hz, 4H), 7.56 (t, *J* = 8.06 Hz, 2H), 7.49 (s, 2H), 3.25-3.12 (m, 4H), 1.49 (d, *J* = 6.90 Hz, 24H), -2.52 (s, 2H). <sup>13</sup>C NMR (62.5 MHz, CDCl<sub>3</sub>): δ 147.051, 143.591, 141.398, 131.492, 131.075, 130.995, 130.776, 128.518, 123.995, 121.210, 118.190, 34.359, 24.383. HRMS (ESI) ([*M*+*H*]<sup>+</sup>) Calcd. for C<sub>56</sub>H<sub>51</sub>Br<sub>4</sub>N<sub>4</sub>: 1099.0811, Found 1099.0836. UV-vis (CH<sub>2</sub>Cl<sub>2</sub>), λ<sub>max</sub> nm (log ε): 422(5.31), 516(4.42), 550(3.92), 594(3.95), 648(3.65).

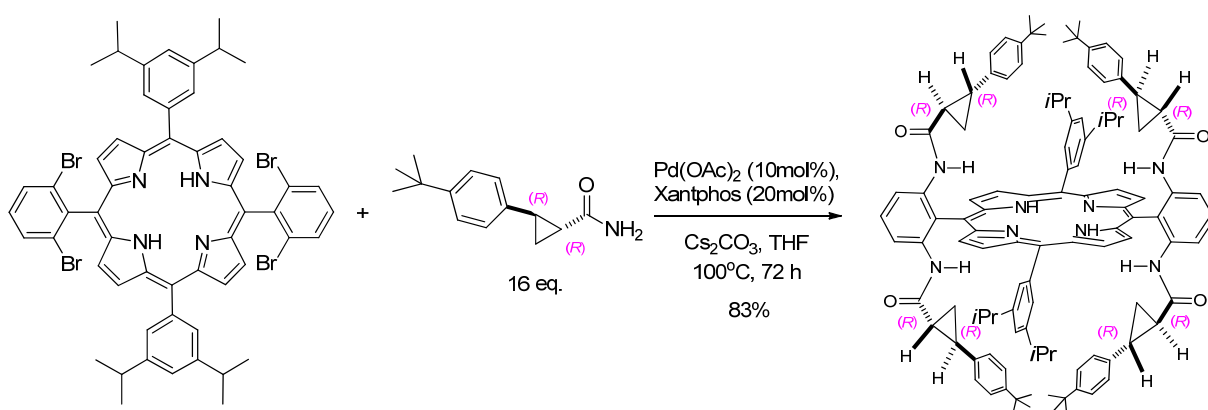

[H<sub>2</sub>(**P3**)] were synthesized according to the above procedure for [H<sub>2</sub>(**P2**)] with 83% yield.<sup>3</sup> Product was purified by flash chromatography with hexanes/EtOAc (4:1) as an eluent (R<sub>f</sub> = 0.3). <sup>1</sup>H NMR (250 MHz, CDCl<sub>3</sub>): δ 9.17 (d, *J* = 4.75 Hz, 4H), 9.01 (d, *J* = 4.68 Hz, 4H), 8.72 (br, 4H), 8.11-7.90 (m, 6H), 7.66 (s, 2H), 6.81 (d, *J* = 6.54 Hz, 8H), 6.71 (s, 4H), 6.39 (d, *J* = 5.45 Hz,

8H), 3.36-3.26 (m, 4H), 2.48-2.25 (m, 4H), 1.68-1.49 (m, 24H), 1.43-1.39 (m, 4H), 1.09 (s, 36H), 0.70 (br, 4H), 0.34 (br, 4H), -2.39 (s, 2H).  $^{13}\text{C}$  NMR (62.5 MHz,  $\text{CDCl}_3$ ):  $\delta$  170.358, 149.167, 147.576, 140.566, 139.381, 136.692, 133.898, 131.327, 130.598, 130.462, 125.709, 124.885, 124.691, 122.803, 117.548, 107.983, 34.397, 34.179, 31.192, 31.035, 26.569, 25.659, 24.538, 24.376, 16.023. HRMS (ESI) ( $[\text{M}+\text{H}]^+$ ) Calcd. for  $\text{C}_{112}\text{H}_{23}\text{N}_8\text{O}_4$ : 1644.9694, Found 1644.9727. UV-vis ( $\text{CH}_2\text{Cl}_2$ ),  $\lambda_{\text{max}}$  nm (log  $\epsilon$ ): 423(5.23), 515(4.06), 550(3.65), 593(3.62), 642(3.50).

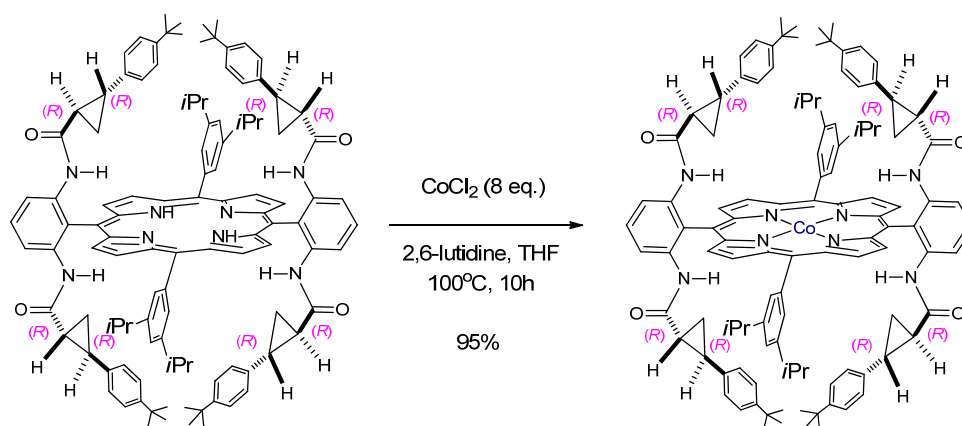

$[\text{Co}(\mathbf{P3})]$  were synthesized according to the above general procedure for  $[\text{Co}(\mathbf{P2})]$  with 98% yield.<sup>3</sup> Product was purified by flash chromatography with hexanes/EtOAc (2:1) as an eluent ( $R_f = 0.6$ ). HRMS (ESI) ( $[\text{M}+\text{H}]^+$ ) Calcd. for  $\text{C}_{112}\text{H}_{121}\text{CoN}_8\text{O}_4$ : 1701.8870, Found 1701.8860. UV-vis ( $\text{CH}_2\text{Cl}_2$ ),  $\lambda_{\text{max}}$  nm (log  $\epsilon$ ): 415(5.26), 530(4.19).

**Non-chiral cobalt porphyrin complex  $[\text{Co}(\mathbf{P4})]$**  were synthesized according to our previous reported procedure.<sup>3</sup>

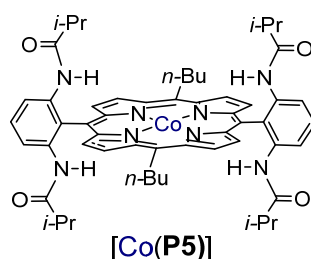

**Non-chiral cobalt porphyrin complex  $[\text{Co}(\mathbf{P5})]$**  were also synthesized according to our previous reported procedure.<sup>3</sup> Product was purified by flash chromatography with hexanes/EtOAc (2:1) as an eluent ( $R_f = 0.3$ ). HRMS (ESI) ( $[\text{M}+\text{H}]^+$ ) Calcd. for  $\text{C}_{56}\text{H}_{65}\text{CoN}_8\text{O}_4$ : 972.4455, Found 972.4479. UV-vis ( $\text{CH}_2\text{Cl}_2$ ),  $\lambda_{\text{max}}$  nm (log  $\epsilon$ ): 415(5.14), 532(4.01).



### Typical Procedure for the Preparation of the Methyl 2-diazo-2-sulfonylacetates (**1**).

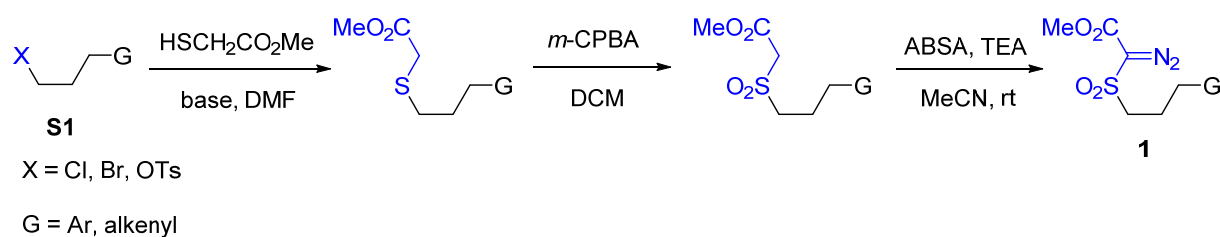

The starting materials **S1**, including halides or tosylated alcohols are either commercially available or synthesized according to known procedures: 3-(4-nitrophenyl)propyl bromide (**S1a**)<sup>6</sup>, 3-(4-trifluoromethyl)benzenepropanol (**S1b**)<sup>7</sup> were synthesized according to the known procedures. 3-phenylpropyl bromide (**S1c**), 3-(4-fluorophenyl)propyl bromide (**S1d**), 3-(4-chloro)benzenepropanol (**S1e**) were used as purchased. 3-(3-Bromo)benzenepropanol (**S1f**)<sup>8</sup>, 3-(3,5-dichloro)benzenepropanol (**S1g**)<sup>8</sup>, 3-(4-methyl)benzenepropanol (**S1h**)<sup>9</sup>, were synthesized according to the known procedures. 3-(4-methoxy)benzenepropanol (**S1i**) were used as purchased. 3-(4-Hydroxyphenyl)propanol (**S1k**)<sup>10</sup> were synthesized according to the known procedure and 3-(4-methoxymethoxyphenyl)propanol (**S1j**) was synthesized through a typical MOM protection of **S1k**. 3-(4-Aminophenyl)propanol (**S1m**)<sup>11</sup> were synthesized according to the known procedure and 3-(4-acetamidophenyl)propanol (**S1l**) was synthesized through a typical acyl protection from **S1m**. 3-(1-Phenyl-1*H*-1,2,3-triazol-4-yl)propan-1-ol (**S1n**)<sup>12</sup> was synthesized according to the known procedure. 5-Bromo-1-pentene (**S1o**) was used as purchased. 5-Bromo-2-methyl-1-pentene (**S1p**)<sup>13</sup> was synthesized according to the known procedure. 4,5-Hexadien-1-ol (**S1q**)<sup>14</sup> was synthesized according to the known procedure. Trans-4-hexenol (**S1r**) and cis-4-hexenol (**S1s**) were used as purchased. The Diazo precursor methyl 2-sulfonylacetates were synthesized according to the known procedure.<sup>5</sup> Using these precursors, methyl 2-diazo-2-sulfonylacetates (**1**) were synthesized by the following diazo transfer procedure:



To a stirred solution of methyl 2-sulfonylacetate (10 mmol) in acetonitrile (10 mL) was added p-acetamidobenzenesulfonyl azide (ABSA, 12mmol). Triethylamine (TEA, 15mmol) was then added dropwise under room temperature. The reaction mixture was stirred at room temperature until the complete consumption of methyl 2-sulfonylacetate (monitored by TLC). Purification of the crude residue by flash chromatography on silica gel afforded methyl 2-diazo-2-sulfonylacetates (**1**) in typically 60-95% yields:

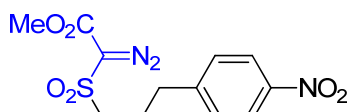

**methyl 2-diazo-2-((3-(4-nitrophenyl)propyl)sulfonyl)acetate (**1a**):**

Product was purified by flash chromatography with hexanes/EtOAc (2:1) as an eluent ( $R_f = 0.3$ ).

$^1\text{H}$  NMR (250 MHz,  $\text{CDCl}_3$ ):  $\delta$  8.12 (d,  $J = 8.61$  Hz, 2H), 7.36 (d,  $J = 8.56$  Hz, 2H), 3.83 (s, 3H), 3.45-3.36 (m, 2H), 2.90 (t,  $J = 7.63$  Hz, 2H), 2.26-2.14 (m, 2H).  $^{13}\text{C}$  NMR (62.5 MHz,  $\text{CDCl}_3$ ):  $\delta$  160.342(C), 147.752(C), 146.753(C), 129.401(CH), 123.887(CH), 73.119(C), 55.612(CH<sub>2</sub>), 53.155(CH<sub>3</sub>), 33.665(CH<sub>2</sub>), 23.768(CH<sub>2</sub>). HRMS (ESI) ( $[\text{M}+\text{Na}]^+$ ) Calcd. for  $\text{C}_{12}\text{H}_{13}\text{N}_3\text{NaO}_6\text{S}$ : 350.0418, Found 350.0424. IR (neat,  $\text{cm}^{-1}$ ): 2144.03, 1714.82, 1508.77, 1345.42, 1214.38, 736.88.

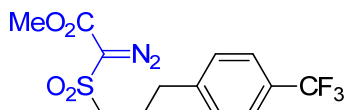

**methyl 2-diazo-2-((3-(4-(trifluoromethyl)phenyl)propyl)sulfonyl)acetate (**1b**):**

Product was purified by flash chromatography with hexanes/EtOAc (3:1) as an eluent ( $R_f = 0.4$ ).

$^1\text{H}$  NMR (250 MHz,  $\text{CDCl}_3$ ):  $\delta$  7.49 (d,  $J = 8.09$  Hz, 2H), 7.23 (d,  $J = 8.01$  Hz, 2H), 3.76 (s, 3H), 3.35-3.26 (m, 2H), 2.78 (t,  $J = 7.52$  Hz, 2H), 2.20-2.04 (m, 2H).  $^{13}\text{C}$  NMR (62.5 MHz,  $\text{CDCl}_3$ ):  $\delta$  160.395(C), 143.869(C), 130.241 (d,  $J = 56$  Hz; C), 128.831(CH), 125.700(CH), 123.873 (q,  $J = 250$  Hz;  $\text{CF}_3$ ), 73.127(C), 55.656(CH<sub>2</sub>), 53.124(CH<sub>3</sub>), 33.667(CH<sub>2</sub>), 23.398(CH<sub>2</sub>). HRMS (ESI) ( $[\text{M}+\text{Na}]^+$ ) Calcd. for  $\text{C}_{13}\text{H}_{13}\text{F}_3\text{N}_2\text{NaO}_4\text{S}$ : 373.0439, Found 373.0444. IR (neat,  $\text{cm}^{-1}$ ): 1241.78, 1708.69, 1329.28, 1148.75, 1093.22, 797.39.

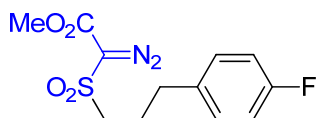

**methyl 2-diazo-2-((3-(4-fluorophenyl)propyl)sulfonyl)acetate (1c):**

Product was purified by flash chromatography with hexanes/EtOAc (3:1) as an eluent ( $R_f = 0.5$ ).

$^1\text{H}$  NMR (250 MHz,  $\text{CDCl}_3$ ):  $\delta$  6.92 (tt,  $J = 4.80, 2.29$  Hz, 2H), 6.83-6.72 (m, 2H), 3.62 (s, 3H), 3.20-3.08 (m, 2H), 2.54 (t,  $J = 7.45$  Hz, 2H), 1.93 (m, 2H).  $^{13}\text{C}$  NMR (62.5 MHz,  $\text{CDCl}_3$ ):  $\delta$  161.667 (d,  $J = 243$  Hz; CF), 160.434(C), 135.408 (d,  $J = 3.2$  Hz; C), 129.969 (d,  $J = 7.9$  Hz; CH), 115.704 (d,  $J = 21$  Hz; CH), 55.720(CH<sub>2</sub>), 53.137(CH<sub>3</sub>), 33.081(CH<sub>2</sub>), 24.408(CH<sub>2</sub>). HRMS (ESI) ( $[\text{M}+\text{H}]^+$ ) Calcd. for  $\text{C}_{12}\text{H}_{14}\text{FN}_2\text{O}_4\text{S}$ : 301.0652, Found 301.0660. IR (neat,  $\text{cm}^{-1}$ ): 2128.04, 1715.01, 1509.29, 1217.86, 742.27.

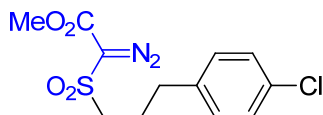

**methyl 2-((3-(4-chlorophenyl)propyl)sulfonyl)-2-diazoacetate (1d):**

Product was purified by flash chromatography with hexanes/EtOAc (3:1) as an eluent ( $R_f = 0.5$ ).

$^1\text{H}$  NMR (250 MHz,  $\text{CDCl}_3$ ):  $\delta$  7.17 (d,  $J = 8.24$  Hz, 3H), 7.03 (d,  $J = 8.30$  Hz, 2H), 3.73 (s, 3H), 3.30-3.24 (m, 2H), 2.66 (t,  $J = 7.44$  Hz, 2H), 2.10-1.98 (m, 2H).  $^{13}\text{C}$  NMR (62.5 MHz,  $\text{CDCl}_3$ ):  $\delta$  160.395(C), 138.323(C), 132.275(C), 129.898(CH), 128.800(CH), 73.042(C), 55.627(CH<sub>2</sub>), 53.163(CH<sub>3</sub>), 33.168(CH<sub>2</sub>), 24.178(CH<sub>2</sub>). HRMS (ESI) ( $[\text{M}+\text{H}]^+$ ) Calcd. for  $\text{C}_{12}\text{H}_{14}\text{ClN}_2\text{O}_4\text{S}$ : 317.0356, Found 317.0367. IR (neat,  $\text{cm}^{-1}$ ): 2134.71, 1721.13, 1297.30, 1149.01, 630.67.

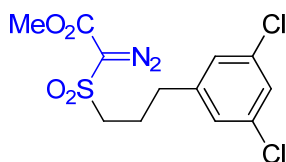

**methyl 2-diazo-2-((3-(3,5-dichlorophenyl)propyl)sulfonyl)acetate (1e):**

Product was purified by flash chromatography with hexanes/EtOAc (3:1) as an eluent ( $R_f = 0.5$ ).

$^1\text{H}$  NMR (250 MHz,  $\text{CDCl}_3$ ):  $\delta$  7.14 (t,  $J = 1.80$  Hz, 1H), 7.00 (d,  $J = 1.79$  Hz, 2H), 3.77 (s, 3H), 3.33-3.27 (m, 2H), 2.67 (t,  $J = 7.56$  Hz, 2H), 2.06 (m, 2H).  $^{13}\text{C}$  NMR (62.5 MHz,  $\text{CDCl}_3$ ):  $\delta$  160.346(C), 143.255(C), 135.106(C), 127.028(CH), 126.851(CH), 73.128(C), 55.530(CH<sub>2</sub>), 53.173(CH<sub>3</sub>), 33.290(CH<sub>2</sub>), 23.871(CH<sub>2</sub>). HRMS (ESI) ( $[\text{M}+\text{Na}]^+$ ) Calcd. for  $\text{C}_{12}\text{H}_{12}\text{Cl}_2\text{N}_2\text{NaO}_4\text{S}$ : 372.9787, Found 372.9798. IR (neat,  $\text{cm}^{-1}$ ): 2130.51, 1718.44, 1336.61,

1217.59, 626.34.

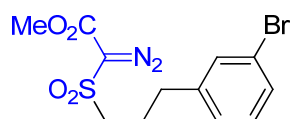

**methyl 2-((3-(3-bromophenyl)propyl)sulfonyl)-2-diazoacetate (1f):**

Product was purified by flash chromatography with hexanes/EtOAc (3:1) as an eluent ( $R_f = 0.5$ ).

$^1\text{H}$  NMR (250 MHz,  $\text{CDCl}_3$ ):  $\delta$  7.15 (m, 5H), 3.74 (s, 3H), 3.34-3.22 (m, 2H), 2.66 (t,  $J = 7.46$  Hz, 2H), 2.14-1.96 (m, 2H).  $^{13}\text{C}$  NMR (62.5 MHz,  $\text{CDCl}_3$ ):  $\delta$  160.385(C), 142.211(C), 131.484(C), 130.352(CH), 129.738(CH), 127.213(CH), 122.703(CH), 73.107(C), 55.675(CH<sub>2</sub>), 53.179(CH<sub>3</sub>), 33.475(CH<sub>2</sub>), 24.117(CH<sub>2</sub>). HRMS (ESI) ( $[\text{M}+\text{H}]^+$ ) Calcd. for  $\text{C}_{12}\text{H}_{14}\text{BrN}_2\text{O}_4\text{S}$ : 360.9851, Found 360.9852. IR (neat,  $\text{cm}^{-1}$ ): 2129.64, 1718.89, 1337.57, 1217.17, 625.98.

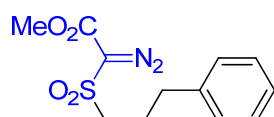

**methyl 2-diazo-2-((3-phenylpropyl)sulfonyl)acetate (1g):**

Product was purified by flash chromatography with hexanes/EtOAc (3:1) as an eluent ( $R_f = 0.5$ ).

$^1\text{H}$  NMR (250 MHz,  $\text{CDCl}_3$ ):  $\delta$  7.39-6.99 (m, 5H), 3.75 (s, 3H), 3.36-3.18 (m, 2H), 2.70 (t,  $J = 7.42$  Hz, 2H), 2.09 (m, 2H).  $^{13}\text{C}$  NMR (62.5 MHz,  $\text{CDCl}_3$ ):  $\delta$  160.365(C), 140.013(C), 128.674(CH), 128.496(CH), 126.504(CH), 73.008(C), 55.709(CH<sub>2</sub>), 52.992(CH<sub>3</sub>), 33.729(CH<sub>2</sub>), 24.262(CH<sub>2</sub>). HRMS (ESI) ( $[\text{M}+\text{H}]^+$ ) Calcd. for  $\text{C}_{12}\text{H}_{15}\text{N}_2\text{O}_4\text{S}$ : 283.0747, Found 283.0753. IR (neat,  $\text{cm}^{-1}$ ): 2127.69, 1713.09, 1294.79, 1145.68, 740.11.

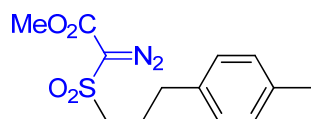

**methyl 2-diazo-2-((3-(p-tolyl)propyl)sulfonyl)acetate (1h):**

Product was purified by flash chromatography with hexanes/EtOAc (3:1) as an eluent ( $R_f = 0.5$ ).

$^1\text{H}$  NMR (250 MHz,  $\text{CDCl}_3$ ):  $\delta$  7.05-6.85 (m, 4H), 3.68 (s, 3H), 3.27-3.21 (m, 2H), 2.60 (t,  $J = 7.39$  Hz, 2H), 2.20 (s, 3H), 2.01 (m, 2H).  $^{13}\text{C}$  NMR (62.5 MHz,  $\text{CDCl}_3$ ):  $\delta$  160.445(C), 136.768(C), 136.029(C), 129.401(CH), 128.381(CH), 73.064(C), 55.849(CH<sub>2</sub>), 53.069(CH<sub>3</sub>), 33.416(CH<sub>2</sub>), 24.419(CH<sub>2</sub>), 21.060(CH<sub>3</sub>). HRMS (ESI) ( $[\text{M}+\text{H}]^+$ ) Calcd. for  $\text{C}_{13}\text{H}_{17}\text{N}_2\text{O}_4\text{S}$ : 297.0903, Found 297.0912. IR (neat,  $\text{cm}^{-1}$ ): 2131.10, 1716.78, 1335.60, 1296.09, 738.47.

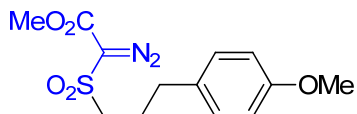

**methyl 2-diazo-2-((3-(4-methoxyphenyl)propyl)sulfonyl)acetate (1i):**

Product was purified by flash chromatography with hexanes/EtOAc (3:1) as an eluent ( $R_f = 0.4$ ).

$^1\text{H}$  NMR (250 MHz,  $\text{CDCl}_3$ ):  $\delta$  7.10 (d,  $J = 8.65$  Hz, 2H), 6.85 (d,  $J = 8.66$  Hz, 2H), 3.82 (s, 3H), 3.78 (s, 3H), 3.42-3.31 (m, 2H), 2.72 (t,  $J = 7.40$  Hz, 2H), 2.12 (m, 2H).  $^{13}\text{C}$  NMR (62.5 MHz,  $\text{CDCl}_3$ ):  $\delta$  160.432(C), 158.331(C), 131.740(C), 129.422(CH), 114.118(CH), 73.041(C), 55.795(CH<sub>2</sub>), 55.292(CH<sub>3</sub>), 53.082(CH<sub>3</sub>), 32.951(CH<sub>2</sub>), 24.520(CH<sub>2</sub>). HRMS (ESI) ( $[\text{M}+\text{H}]^+$ ) Calcd. for  $\text{C}_{13}\text{H}_{17}\text{N}_2\text{O}_5\text{S}$ : 313.0852, Found 313.0862. IR (neat,  $\text{cm}^{-1}$ ): 2134.89, 1711.77, 1335.39, 1148.52, 741.66.

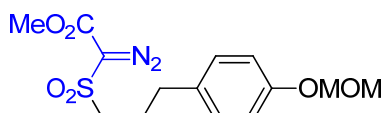

**methyl 2-diazo-2-((3-(4-(methoxymethoxy)phenyl)propyl)sulfonyl)acetate (1j):**

Product was purified by flash chromatography with hexanes/EtOAc (2:1) as an eluent ( $R_f = 0.4$ ).

$^1\text{H}$  NMR (250 MHz,  $\text{CDCl}_3$ ):  $\delta$  7.01 (d,  $J = 8.61$  Hz, 2H), 6.89 (d,  $J = 8.65$  Hz, 2H), 5.06 (s, 2H), 3.74 (s, 3H), 3.38 (s, 3H), 3.33-3.20 (m, 2H), 2.63 (t,  $J = 7.37$  Hz, 2H), 2.04 (m, 2H).  $^{13}\text{C}$  NMR (62.5 MHz,  $\text{CDCl}_3$ ):  $\delta$  160.455(C), 155.978(C), 133.054(C), 129.458(CH), 116.567(CH), 94.546(CH<sub>2</sub>), 73.087(C), 55.990(CH<sub>3</sub>), 55.809(CH<sub>2</sub>), 53.105(CH<sub>3</sub>), 33.040(CH<sub>2</sub>), 24.481(CH<sub>2</sub>). HRMS (ESI) ( $[\text{M}+\text{H}]^+$ ) Calcd. for  $\text{C}_{14}\text{H}_{18}\text{N}_2\text{O}_6\text{SNa}$ : 365.0778, Found 365.0786. IR (neat,  $\text{cm}^{-1}$ ): 2129.07, 1715.22, 1295.81, 1147.29, 740.72.

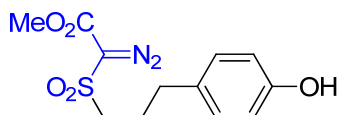

**methyl 2-diazo-2-((3-(4-hydroxyphenyl)propyl)sulfonyl)acetate (1k):**

Product was purified by flash chromatography with hexanes/EtOAc (2:1) as an eluent ( $R_f = 0.3$ ).

$^1\text{H}$  NMR (250 MHz,  $\text{CDCl}_3$ ):  $\delta$  6.94 (d,  $J = 8.42$  Hz, 2H), 6.70 (d,  $J = 8.46$  Hz, 2H), 5.49 (s, 1H), 3.75 (s, 3H), 3.35-3.21 (m, 2H), 2.61 (t,  $J = 7.33$  Hz, 2H), 2.10-1.98 (m, 2H).  $^{13}\text{C}$  NMR (62.5 MHz,  $\text{CDCl}_3$ ):  $\delta$  160.594(C), 154.482(C), 131.548(C), 129.583(CH), 115.612(CH), 55.856(CH<sub>2</sub>), 53.248(CH<sub>3</sub>), 32.974(CH<sub>2</sub>), 24.490(CH<sub>2</sub>). HRMS (ESI) ( $[\text{M}+\text{H}]^+$ ) Calcd. for

C<sub>12</sub>H<sub>15</sub>N<sub>2</sub>O<sub>5</sub>S: 299.0696, Found 299.0702. IR (neat, cm<sup>-1</sup>): 3450.00, 2137.39, 1727.07, 1293.04, 1217.25, 832.44.

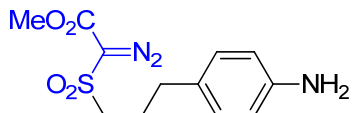

**methyl 2-((3-(4-aminophenyl)propyl)sulfonyl)-2-diazoacetate (1l):**

Product was purified by flash chromatography with hexanes/EtOAc (1:1) as an eluent (R<sub>f</sub> = 0.3).

<sup>1</sup>H NMR (250 MHz, CDCl<sub>3</sub>): δ 6.86 (d, *J* = 8.22 Hz, 2H), 6.54 (d, *J* = 8.27 Hz, 2H), 3.74 (s, 3H), 3.64-3.34 (br, 2H), 3.34-3.18 (m, 2H), 2.56 (t, *J* = 7.33 Hz, 2H), 2.07-1.94 (m, 2H). <sup>13</sup>C NMR (62.5 MHz, CDCl<sub>3</sub>): δ 160.498(C), 145.137(C), 129.269(C), 121.904(CH), 115.384(CH), 73.068(C), 55.868(CH<sub>2</sub>), 53.139(CH<sub>3</sub>), 33.007(CH<sub>2</sub>), 24.576(CH<sub>2</sub>). HRMS (ESI) ([M+H]<sup>+</sup>) Calcd. for C<sub>12</sub>H<sub>16</sub>N<sub>3</sub>O<sub>4</sub>S: 298.0856, Found 298.0863. IR (neat, cm<sup>-1</sup>): 2124.92, 1715.57, 1299.03, 1142.19, 622.93.

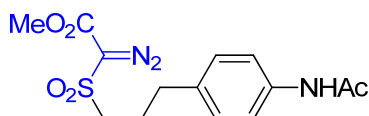

**methyl 2-((3-(4-acetamidophenyl)propyl)sulfonyl)-2-diazoacetate (1m):**

Product was purified by flash chromatography with hexanes/EtOAc (1:1.5) as an eluent (R<sub>f</sub> = 0.3).

<sup>1</sup>H NMR (250 MHz, CDCl<sub>3</sub>): δ 8.00 (s, 1H), 7.38 (d, *J* = 8.39 Hz, 2H), 7.01 (d, *J* = 8.37 Hz, 2H), 3.74 (s, 3H), 3.34-3.20 (m, 2H), 2.65 (t, *J* = 7.33 Hz, 2H), 2.03 (m, 5H). <sup>13</sup>C NMR (62.5 MHz, CDCl<sub>3</sub>): δ 168.924(C), 160.412(C), 136.723(C), 135.442(C), 128.849(CH), 120.426(CH), 73.062(C), 55.822(CH<sub>2</sub>), 53.162(CH<sub>3</sub>), 33.227(CH<sub>2</sub>), 24.404(CH<sub>2</sub>), 24.221(CH<sub>3</sub>). HRMS (ESI) ([M+H]<sup>+</sup>) Calcd. for C<sub>14</sub>H<sub>18</sub>N<sub>3</sub>O<sub>5</sub>S: 340.0961, Found 340.0966. IR (neat, cm<sup>-1</sup>): 2133.04, 1711.39, 1325.48, 1224.19, 736.59.

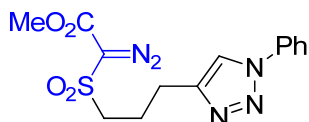

**methyl 2-diazo-2-((3-(1-phenyl-1H-1,2,3-triazol-4-yl)propyl)sulfonyl)acetate (1n):**

Product was purified by flash chromatography with hexanes/EtOAc (1:2) as an eluent (R<sub>f</sub> = 0.5).

<sup>1</sup>H NMR (250 MHz, CDCl<sub>3</sub>): δ 7.79 (s, 1H), 7.63 (m, 2H), 7.48-7.28 (m, 3H), 3.74 (s, 3H), 3.49-3.39 (m, 2H), 2.89 (t, *J* = 7.22 Hz, 2H), 2.28-2.16 (m, 2H). <sup>13</sup>C NMR (62.5 MHz, CDCl<sub>3</sub>): δ

160.380(C), 146.383(C), 137.029(C), 129.772(CH), 128.707(CH), 120.409(CH), 119.767(CH), 73.046(C), 55.637(CH<sub>2</sub>), 53.126(CH<sub>3</sub>), 23.739(CH<sub>2</sub>), 22.482(CH<sub>2</sub>). HRMS (ESI) ([M+Na]<sup>+</sup>) Calcd. for C<sub>14</sub>H<sub>15</sub>N<sub>5</sub>NaO<sub>4</sub>S: 372.0736, Found 372.0749. IR (neat, cm<sup>-1</sup>): 2147.09, 1728.70, 1335.78, 1140.71, 629.10.

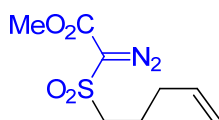

**methyl 2-diazo-2-(pent-4-en-1-ylsulfonyl)acetate (1o):**

Product was purified by flash chromatography with hexanes/EtOAc (3:1) as an eluent (R<sub>f</sub> = 0.5).

<sup>1</sup>H NMR (250 MHz, CDCl<sub>3</sub>): δ 5.69 (tdd, *J* = 17.02, 10.32, 6.65 Hz, 1H), 5.03 (dd, *J* = 7.79, 1.26 Hz, 1H), 4.97 (s, 1H), 3.80 (s, 3H), 3.35-3.29 (m, 2H), 2.23-2.04 (m, 2H), 1.99-1.72 (m, 2H). <sup>13</sup>C NMR (62.5 MHz, CDCl<sub>3</sub>): δ 160.458(C), 136.112(CH), 116.699(CH<sub>2</sub>), 72.941(C), 55.809(CH<sub>2</sub>), 53.117(CH<sub>3</sub>), 31.754(CH<sub>2</sub>), 21.750(CH<sub>2</sub>). HRMS (ESI) ([M+H]<sup>+</sup>) Calcd. for C<sub>8</sub>H<sub>13</sub>N<sub>2</sub>O<sub>4</sub>S: 233.0590, Found 233.0592. IR (neat, cm<sup>-1</sup>): 2127.20, 1713.21, 1294.51, 1143.75, 740.59.

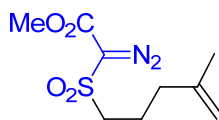

**methyl 2-diazo-2-((4-methylpent-4-en-1-yl)sulfonyl)acetate (1p):**

Product was purified by flash chromatography with hexanes/EtOAc (3:1) as an eluent (R<sub>f</sub> = 0.5).

<sup>1</sup>H NMR (250 MHz, CDCl<sub>3</sub>): δ 4.73 (d, *J* = 19.79 Hz, 2H), 3.83 (s, 3H), 3.39-3.24 (m, 2H), 2.14 (t, *J* = 7.25 Hz, 2H), 1.95 (td, *J* = 18.75, 7.51 Hz, 2H), 1.69 (s, 3H). <sup>13</sup>C NMR (62.5 MHz, CDCl<sub>3</sub>): δ 160.450(C), 143.160(C), 111.819(CH<sub>2</sub>), 72.973(C), 55.921(CH<sub>2</sub>), 53.054(CH<sub>3</sub>), 35.662(CH<sub>2</sub>), 21.951(CH<sub>2</sub>), 20.362(CH<sub>3</sub>). HRMS (ESI) ([M+Na]<sup>+</sup>) Calcd. for C<sub>9</sub>H<sub>14</sub>N<sub>2</sub>O<sub>4</sub>NaS: 269.0566, Found 269.0578. IR (neat, cm<sup>-1</sup>): 2127.24, 1713.81, 1294.58, 1147.20, 739.77.

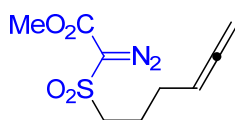

**methyl 2-diazo-2-(hexa-4,5-dien-1-ylsulfonyl)acetate (1q):**

Product was purified by flash chromatography with hexanes/EtOAc (3:1) as an eluent (R<sub>f</sub> = 0.5).

<sup>1</sup>H NMR (500 MHz, CDCl<sub>3</sub>): δ 5.09 (p, *J* = 6.58 Hz, 1H), 4.73 (td, *J* = 6.63, 3.29 Hz, 2H), 3.86

(s, 3H), 3.47-3.38 (m, 2H), 2.16 (m, 2H), 1.96 (m, 2H)  $^{13}\text{C}$  NMR (125 MHz,  $\text{CDCl}_3$ ):  $\delta$  208.587(C), 160.441(C), 88.050(CH), 76.054( $\text{CH}_2$ ), 55.886( $\text{CH}_2$ ), 53.089( $\text{CH}_3$ ), 26.231( $\text{CH}_2$ ), 21.895( $\text{CH}_2$ ). HRMS (ESI) ( $[\text{M}+\text{H}]^+$ ) Calcd. for  $\text{C}_9\text{H}_{13}\text{N}_2\text{O}_4\text{S}$ : 245.0590, Found 245.0596. IR (neat,  $\text{cm}^{-1}$ ): 2126.04, 1712.55, 1330.54, 1293.43, 1083.18, 740.07.

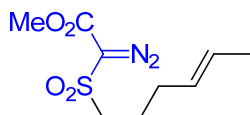

**(E)-methyl 2-diazo-2-(hex-4-en-1-ylsulfonyl)acetate (1r) (Note: contains 5% Z-isomer):**

Product was purified by flash chromatography with hexanes/EtOAc (3:1) as an eluent ( $R_f = 0.5$ ).

$^1\text{H}$  NMR (500 MHz,  $\text{CDCl}_3$ ):  $\delta$  5.49 (m, 1H), 5.35 (m, 1H), 3.87 (s, 3H), 3.39-3.34 (m, 2H), 2.14 (dt,  $J = 7.5, 6.5$  Hz, 2H), 1.93-1.85 (m, 2H), 1.66 (d,  $J = 6.43$  Hz, 3H)  $^{13}\text{C}$  NMR (125 MHz,  $\text{CDCl}_3$ ):  $\delta$  160.495(C), 128.504(CH), 127.519(CH), 55.964( $\text{CH}_2$ ), 53.077( $\text{CH}_3$ ), 30.676( $\text{CH}_2$ ), 22.457( $\text{CH}_2$ ), 17.881( $\text{CH}_3$ ). HRMS (ESI) ( $[\text{M}+\text{Na}]^+$ ) Calcd. for  $\text{C}_9\text{H}_{14}\text{N}_2\text{O}_4\text{NaS}$ : 269.0566, Found 269.0571. IR (neat,  $\text{cm}^{-1}$ ): 2125.19, 1713.43, 1292.97, 1142.38, 1082.38, 739.37.

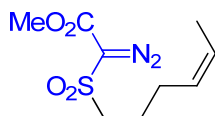

**(Z)-methyl 2-diazo-2-(hex-4-en-1-ylsulfonyl)acetate (1s) (Note: contains 6% E-isomer):**

Product was purified by flash chromatography with hexanes/EtOAc (3:1) as an eluent ( $R_f = 0.5$ ).

$^1\text{H}$  NMR (500 MHz,  $\text{CDCl}_3$ ):  $\delta$  5.62-5.54 (m, 1H), 5.36-5.31 (m, 1H), 3.89 (s, 3H), 3.42-3.37 (m, 2H), 2.22 (dt,  $J = 7.0, 7.5$  Hz, 2H), 1.95-1.88 (m, 2H), 1.62 (d,  $J = 6.84$  Hz, 3H).  $^{13}\text{C}$  NMR (125 MHz,  $\text{CDCl}_3$ ):  $\delta$  160.467(C), 127.621(CH), 126.370(CH), 55.994( $\text{CH}_2$ ), 53.050( $\text{CH}_3$ ), 24.983( $\text{CH}_2$ ), 22.490( $\text{CH}_2$ ), 12.822( $\text{CH}_3$ ). HRMS (ESI) ( $[\text{M}+\text{Na}]^+$ ) Calcd. for  $\text{C}_9\text{H}_{14}\text{N}_2\text{O}_4\text{NaS}$ : 269.0566, Found 269.0571. IR (neat,  $\text{cm}^{-1}$ ): 2125.42, 1713.52, 1293.95, 1141.76, 740.29.

### General Procedure for [Co(Por)]-catalyzed Intramolecular C-H Alkylation Reaction.

An oven dried Schlenk tube was charged with catalyst (2 mol %). The Schlenk tube was then evacuated and back filled with nitrogen. The Teflon screw cap was replaced with a rubber septum and methyl 2-diazo-2-sulfonylacetate (**1**, 0.1 mmol) was added followed by 0.5 ml solvent. The Schlenk tube was then purged with nitrogen for 1 minute and the rubber septum was replaced with a Teflon screw cap. The reaction mixture was then stirred at room temperature. After 72 h, the reaction mixture was purified by flash chromatography. The fractions containing the product were collected and concentrated by rotary evaporation to afford the compound.

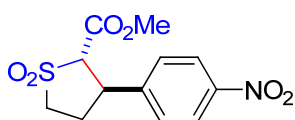

**methyl 3-(4-nitrophenyl)tetrahydrothiophene-2-carboxylate 1,1-dioxide (2a):** Product was purified by flash chromatography with hexanes/EtOAc (1:1) as an eluent ( $R_f = 0.5$ ).  $[\alpha]_D^{20} = -42.451$  ( $c = 0.2$ ,  $\text{CHCl}_3$ ).  $^1\text{H NMR}$  (250 MHz,  $\text{CDCl}_3$ )  $\delta$  8.22-8.11 (m, 2H), 7.49-7.38 (m, 2H), 3.93-4.09 (m, 2H), 3.762 (s, 3H), 3.45 (ddd,  $J = 12.91, 7.09, 1.52$  Hz, 1H), 3.22 (ddd,  $J = 12.93, 6.96, 6.96$  Hz, 1H), 2.43-2.20 (m, 1H), 2.63-2.45 (m, 1H).  $^{13}\text{C NMR}$  (62.5 MHz,  $\text{CDCl}_3$ )  $\delta$  164.915(C), 147.742(C), 145.966(C), 128.392(CH), 124.478(CH), 71.000(CH), 53.811(CH<sub>3</sub>), 52.839(CH<sub>2</sub>), 44.498(CH), 28.076(CH<sub>2</sub>). HRMS (ESI) ( $[\text{M}+\text{Na}]^+$ ) Calcd. for  $\text{C}_{12}\text{H}_{13}\text{NO}_6\text{SNa}$ : 322.0356, Found 322.0363. IR (neat,  $\text{cm}^{-1}$ ): 1742.38, 1519.50, 1349.40, 1323.39, 1279.11. HPLC analysis: ee (*trans*) = 92%. Whelk(90% hexanes: 10% isopropanol, 1.0 mL/min) *trans*-isomer:  $t_{\text{major}} = 61.4$  min,  $t_{\text{minor}} = 74.7$  min.

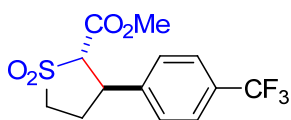

**methyl 3-(4-(trifluoromethyl)phenyl)tetrahydrothiophene-2-carboxylate 1,1-dioxide (2b):** Product was purified by flash chromatography with hexanes/EtOAc (3:1) as an eluent ( $R_f = 0.4$ ).  $[\alpha]_D^{20} = -25.626$  ( $c = 0.2$ ,  $\text{CHCl}_3$ ).  $^1\text{H NMR}$  (250 MHz,  $\text{CDCl}_3$ )  $\delta$  7.56 (d,  $J = 8.17$  Hz, 2H), 7.37 (d,  $J = 8.14$  Hz, 2H), 4.02-3.89 (m, 2H), 3.75 (s, 3H), 3.42 (ddd,  $J = 12.96, 6.97, 1.60$  Hz, 1H), 3.19 (ddd,  $J = 12.92, 6.93, 6.93$  Hz, 1H), 2.58-2.42 (m, 1H), 2.38-2.24 (m, 1H).  $^{13}\text{C NMR}$  (62.5



MHz,  $\text{CDCl}_3$ )  $\delta$  165.051(C), 142.747(C), 130.519 (q,  $J = 32.5$  Hz, C), 127.737(CH), 126.251 (q,  $J = 3.7$  Hz, CH), 124.053 (q,  $J = 245$  Hz;  $\text{CF}_3$ ), 71.210(CH), 53.696(CH<sub>3</sub>), 52.977(CH<sub>2</sub>), 44.658(CH), 28.224(CH<sub>2</sub>). HRMS (ESI) ( $[\text{M}+\text{Na}]^+$ ) Calcd. for  $\text{C}_{13}\text{H}_{13}\text{F}_3\text{NaO}_4\text{S}$ : 345.0379, Found 345.0379. IR (neat,  $\text{cm}^{-1}$ ): 1734.95, 1319.50, 1283.61, 1151.53, 1116.38. HPLC analysis: ee (*trans*) = 84%. Whelk(90% hexanes: 10% isopropanol, 1.0 mL/min) *trans*-isomer:  $t_{\text{major}} = 24.6$  min,  $t_{\text{minor}} = 32.8$  min.

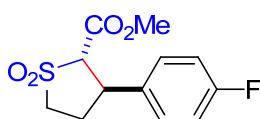

**methyl 3-(4-fluorophenyl)tetrahydrothiophene-2-carboxylate 1,1-dioxide (2c):** Product was purified by flash chromatography with hexanes/EtOAc (3:1) as an eluent ( $R_f = 0.4$ ).  $[\alpha]_{\text{D}}^{20} = -32.653$  ( $c = 0.2$ ,  $\text{CHCl}_3$ ).  $^1\text{H}$  NMR (250 MHz,  $\text{CDCl}_3$ )  $\delta$  7.27-7.18 (m, 2H), 7.05-6.92 (m, 2H), 3.94-3.84 (m, 2H), 3.74 (s, 3H), 3.40 (ddd,  $J = 12.92, 6.91, 1.50$  Hz, 1H), 3.16 (ddd,  $J = 12.91, 6.92, 6.92$  Hz, 1H), 2.54-2.38 (m, 1H), 2.34-2.16 (m, 1H).  $^{13}\text{C}$  NMR (62.5 MHz,  $\text{CDCl}_3$ )  $\delta$  165.213(C), 162.491 (d,  $J = 246$  Hz, CF), 134.488 (d,  $J = 3.2$  Hz, C), 128.873(d,  $J = 8$  Hz, CH), 116.197 (d,  $J = 21.4$  Hz, CH), 71.622(CH), 53.627(CH<sub>3</sub>), 53.153(CH<sub>2</sub>), 44.359(CH), 28.510(CH<sub>2</sub>). HRMS (ESI) ( $[\text{M}+\text{H}]^+$ ) Calcd. for  $\text{C}_{12}\text{H}_{14}\text{FO}_4\text{S}$ : 273.0591, Found 273.0593. IR (neat,  $\text{cm}^{-1}$ ): 1737.03, 1512.97, 1320.24, 1280.39, 1226.37. HPLC analysis: ee (*trans*) = 91%. Whelk(90% hexanes: 10% isopropanol, 1.0 mL/min) *trans*-isomer:  $t_{\text{major}} = 25.6$  min,  $t_{\text{minor}} = 33.2$  min.

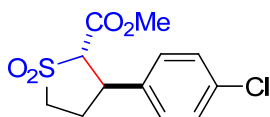

**methyl 3-(4-chlorophenyl)tetrahydrothiophene-2-carboxylate 1,1-dioxide (2d):** Product was purified by flash chromatography with hexanes/EtOAc (3:1) as an eluent ( $R_f = 0.4$ ).  $[\alpha]_{\text{D}}^{20} = -19.185$  ( $c = 0.2$ ,  $\text{CHCl}_3$ ).  $^1\text{H}$  NMR (250 MHz,  $\text{CDCl}_3$ )  $\delta$  7.31-7.23 (m, 2H), 7.19-7.15 (m, 2H), 3.95-3.79 (m, 2H), 3.73 (s, 3H), 3.40 (ddd,  $J = 12.88, 6.95, 1.60$  Hz, 1H), 3.16 (ddd,  $J = 12.92, 6.92, 6.92$  Hz, 1H), 2.53-2.38 (m, 1H), 2.35-2.14 (m, 1H).  $^{13}\text{C}$  NMR (62.5 MHz,  $\text{CDCl}_3$ )  $\delta$  165.037(C), 137.135(C), 133.937(C), 129.325(CH), 128.553(CH), 71.339(CH), 53.547(CH<sub>3</sub>), 53.039(CH<sub>2</sub>), 44.326(CH), 28.238(CH<sub>2</sub>). HRMS (ESI) ( $[\text{M}+\text{H}]^+$ ) Calcd. for  $\text{C}_{12}\text{H}_{14}\text{ClO}_4\text{S}$ :

289.0296, Found 289.0298. IR (neat,  $\text{cm}^{-1}$ ): 1737.61, 1494.26, 1310.39, 1297.91, 1278.27. HPLC analysis: ee (*trans*) = 91%. Whelk(90% hexanes: 10% isopropanol, 1.0 mL/min) *trans*-isomer:  $t_{\text{major}} = 28.3$  min,  $t_{\text{minor}} = 45.0$  min.

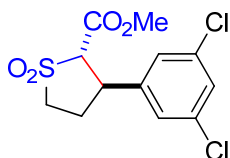

**methyl 3-(3,5-dichlorophenyl)tetrahydrothiophene-2-carboxylate 1,1-dioxide (2e):** Product was purified by flash chromatography with hexanes/EtOAc (3:1) as an eluent ( $R_f = 0.4$ ).  $[\alpha]_{\text{D}}^{20} = -26.960$  ( $c = 0.2$ ,  $\text{CHCl}_3$ ).  $^1\text{H}$  NMR (250 MHz,  $\text{CDCl}_3$ )  $\delta$  7.24 (t,  $J = 1.81$  Hz, 1H), 7.13 (d,  $J = 1.81$  Hz, 2H), 3.94-3.81 (m, 2H), 3.77 (s, 3H), 3.40 (ddd,  $J = 13.01, 6.93, 1.41$  Hz, 1H), 3.16 (ddd,  $J = 12.97, 6.90, 6.90$  Hz, 1H), 2.50-2.42 (m, 1H), 2.33-2.18 (m, 1H).  $^{13}\text{C}$  NMR (62.5 MHz,  $\text{CDCl}_3$ )  $\delta$  165.030(C), 142.104(C), 135.832(C), 128.497(CH), 128.378(CH), 125.940(CH), 70.990(CH), 53.806(CH<sub>3</sub>), 52.861(CH<sub>2</sub>), 44.240(CH), 28.116(CH<sub>2</sub>). HRMS (ESI) ( $[\text{M}+\text{H}]^+$ ) Calcd. for  $\text{C}_{12}\text{H}_{13}\text{Cl}_2\text{O}_4\text{S}$ : 322.9906, Found 322.9909. IR (neat,  $\text{cm}^{-1}$ ): 1722.66, 1566.31, 1435.11, 1308.25, 1292.81, 1261.14. HPLC analysis: ee (*trans*) = 84%. Whelk(90% hexanes: 10% isopropanol, 1.0 mL/min) *trans*-isomer:  $t_{\text{major}} = 40.1$  min,  $t_{\text{minor}} = 54.8$  min.

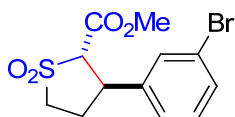

**methyl 3-(3-bromophenyl)tetrahydrothiophene-2-carboxylate 1,1-dioxide (2f):** Product was purified by flash chromatography with hexanes/EtOAc (3:1) as an eluent ( $R_f = 0.4$ ).  $[\alpha]_{\text{D}}^{20} = -25.369$  ( $c = 0.2$ ,  $\text{CHCl}_3$ ).  $^1\text{H}$  NMR (250 MHz,  $\text{CDCl}_3$ )  $\delta$  7.43-7.32 (m, 2H), 7.19-7.16 (m, 2H), 3.94-3.84 (m, 2H), 3.76 (s, 3H), 3.40 (ddd,  $J = 12.80, 6.81, 1.29$  Hz, 1H), 3.16 (ddd,  $J = 12.95, 6.88, 6.88$  Hz, 1H), 2.50-2.42 (m, 1H), 2.35-2.22 (m, 1H).  $^{13}\text{C}$  NMR (62.5 MHz,  $\text{CDCl}_3$ )  $\delta$  165.118(C), 141.001(C), 131.390(C), 130.850(CH), 130.365(CH), 125.984(CH), 123.242(CH), 71.279(CH), 53.750(CH<sub>3</sub>), 53.043(CH<sub>2</sub>), 44.576(CH), 28.339(CH<sub>2</sub>). HRMS (ESI) ( $[\text{M}+\text{NH}_4]^+$ ) Calcd. for  $\text{C}_{12}\text{H}_{17}\text{BrNO}_4\text{S}$ : 350.0056, Found 350.0055. IR (neat,  $\text{cm}^{-1}$ ): 1741.54, 1321.61, 1277.79, 1174.73, 1119.48. HPLC analysis: ee (*trans*) = 88%. Whelk(90% hexanes: 10% isopropanol, 1.0 mL/min) *trans*-isomer:  $t_{\text{major}} = 27.8$  min,  $t_{\text{minor}} = 38.5$  min.

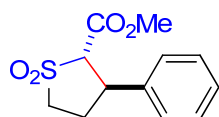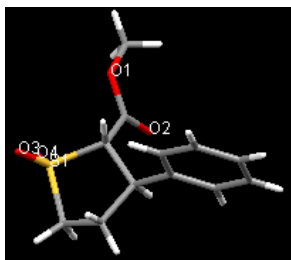

**(2S,3R)-methyl 3-phenyltetrahydrothiophene-2-carboxylate 1,1-dioxide (2g):** Product was purified by flash chromatography with hexanes/EtOAc (3:1) as an eluent ( $R_f = 0.4$ ).  $[\alpha]_D^{20} = -22.201$  ( $c = 0.2$ ,  $\text{CHCl}_3$ ).  $^1\text{H NMR}$  (250 MHz,  $\text{CDCl}_3$ )  $\delta$  7.28 (m, 5H), 4.00-3.82 (m, 2H), 3.74 (s, 3H), 3.40 (ddd,  $J = 12.91, 6.90, 1.46$  Hz, 1H), 3.17 (ddd,  $J = 12.90, 6.90, 6.90$  Hz, 1H), 2.54-2.40 (m, 1H), 2.39-2.21 (m, 1H).  $^{13}\text{C NMR}$  (62.5 MHz,  $\text{CDCl}_3$ )  $\delta$  165.293(C), 138.717(C), 129.246(CH), 128.148(CH), 127.197(CH), 71.545(CH), 53.586(CH<sub>3</sub>), 53.200(CH<sub>2</sub>), 45.067(CH), 28.472(CH<sub>2</sub>). HRMS (ESI) ( $[\text{M}+\text{Na}]^+$ ) Calcd. for  $\text{C}_{12}\text{H}_{14}\text{NaO}_4\text{S}$ : 277.0505, Found 277.0503. IR (neat,  $\text{cm}^{-1}$ ): 1731.58, 1321.27, 1304.82, 1281.99, 1267.05. HPLC analysis: ee (*trans*) = 90%. Whelk(90% hexanes: 10% isopropanol, 1.0 mL/min) *trans*-isomer:  $t_{\text{major}} = 27.7$  min,  $t_{\text{minor}} = 35.8$  min.

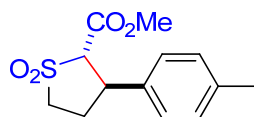

**methyl 3-(p-tolyl)tetrahydrothiophene-2-carboxylate 1,1-dioxide (2h):** Product was purified by flash chromatography with hexanes/EtOAc (3:1) as an eluent ( $R_f = 0.4$ ).  $[\alpha]_D^{20} = -37.175$  ( $c = 0.2$ ,  $\text{CHCl}_3$ ).  $^1\text{H NMR}$  (250 MHz,  $\text{CDCl}_3$ )  $\delta$  7.17-7.04 (m, 4H), 3.97-3.77 (m, 2H), 3.73 (s, 3H), 3.38 (ddd,  $J = 12.86, 6.89, 1.61$  Hz, 1H), 3.15 (ddd,  $J = 12.88, 6.93, 6.93$  Hz, 1H), 2.53-2.36 (m, 1H), 2.36-2.13 (m, 1H), 2.26 (s, 3H).  $^{13}\text{C NMR}$  (62.5 MHz,  $\text{CDCl}_3$ )  $\delta$  165.316(C), 137.960(C), 135.726(C), 129.885(CH), 127.052(CH), 71.654(CH), 53.511(CH<sub>3</sub>), 53.285(CH<sub>2</sub>), 44.807(CH), 28.548(CH<sub>2</sub>), 21.100(CH<sub>3</sub>). HRMS (ESI) ( $[\text{M}+\text{H}]^+$ ) Calcd. for  $\text{C}_{13}\text{H}_{17}\text{O}_4\text{S}$ : 269.0842, Found 269.0841. IR (neat,  $\text{cm}^{-1}$ ): 1742.43, 1516.45, 1308.91, 1284.14, 1253.43. HPLC analysis: ee (*trans*) = 92%. Whelk(90% hexanes: 10% isopropanol, 1.0 mL/min) *trans*-isomer:  $t_{\text{major}} = 28.6$  min,  $t_{\text{minor}} = 40.9$  min.

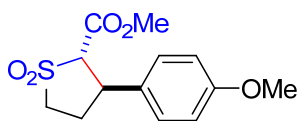

**methyl 3-(4-methoxyphenyl)tetrahydrothiophene-2-carboxylate 1,1-dioxide (2i):** Product was purified by flash chromatography with hexanes/EtOAc (2:1) as an eluent ( $R_f = 0.4$ ).  $[\alpha]_D^{20} = -83.267$  ( $c = 0.2$ ,  $\text{CHCl}_3$ ).  $^1\text{H NMR}$  (250 MHz,  $\text{CDCl}_3$ )  $\delta$  7.18-7.10 (m, 2H), 6.84-6.79 (m, 2H), 3.92-3.80 (m, 2H), 3.72 (s, 3H), 3.72 (s, 3H), 3.38 (ddd,  $J = 12.80, 6.81, 1.29$  Hz, 1H), 3.15 (ddd,  $J = 12.89, 6.93, 6.93$  Hz, 1H), 2.48-2.38 (m, 1H), 2.33-2.21 (m, 1H).  $^{13}\text{C NMR}$  (62.5 MHz,  $\text{CDCl}_3$ )  $\delta$  165.323(C), 159.365(C), 130.652(C), 128.273(CH), 114.577(CH), 71.759(CH), 55.372(CH<sub>3</sub>), 53.503(CH<sub>2</sub>), 53.318(CH<sub>3</sub>), 44.472(CH), 28.576(CH<sub>2</sub>). HRMS (ESI) ( $[\text{M}+\text{Na}]^+$ ) Calcd. for  $\text{C}_{13}\text{H}_{16}\text{NaO}_5\text{S}$ : 307.0611, Found 306.0604. IR (neat,  $\text{cm}^{-1}$ ): 1728.44, 1515.67, 1336.49, 1318.35, 1282.93, 1269.83. HPLC analysis: ee (*trans*) = 94%. Whelk(80% hexanes: 20% isopropanol, 1.0 mL/min) *trans*-isomer:  $t_{\text{major}} = 25.2$  min,  $t_{\text{minor}} = 41.4$  min.

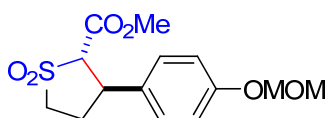

**methyl 3-(4-(methoxymethoxy)phenyl)tetrahydrothiophene-2-carboxylate 1,1-dioxide (2j):** Product was purified by flash chromatography with hexanes/EtOAc (1:1) as an eluent ( $R_f = 0.6$ ).  $[\alpha]_D^{20} = -27.858$  ( $c = 0.2$ ,  $\text{CHCl}_3$ ).  $^1\text{H NMR}$  (250 MHz,  $\text{CDCl}_3$ )  $\delta$  7.18-7.08 (m, 2H), 7.01-6.89 (m, 2H), 5.09 (s, 2H), 3.95-3.80 (m, 2H), 3.74 (s, 3H), 3.47-3.31 (m, 1H), 3.40 (s, 3H), 3.15 (ddd,  $J = 12.90, 6.95, 6.95$  Hz, 1H), 2.51-2.35 (m, 1H), 2.35-2.18 (m, 1H).  $^{13}\text{C NMR}$  (62.5 MHz,  $\text{CDCl}_3$ )  $\delta$  165.300(C), 156.992(C), 131.945(C), 128.320(CH), 116.921(CH), 94.429(CH<sub>2</sub>), 71.710(CH), 56.112(CH<sub>3</sub>), 53.528(CH<sub>3</sub>), 53.294(CH<sub>2</sub>), 44.481(CH), 28.559(CH<sub>2</sub>). HRMS (ESI) ( $[\text{M}+\text{Na}]^+$ ) Calcd. for  $\text{C}_{14}\text{H}_{18}\text{NaO}_6\text{S}$ : 337.0716, Found 337.0721. IR (neat,  $\text{cm}^{-1}$ ): 1734.84, 1513.88, 1313.63, 1279.90, 1190.92. HPLC analysis: ee (*trans*) = 93%. Whelk(90% hexanes: 10% isopropanol, 1.0 mL/min) *trans*-isomer:  $t_{\text{major}} = 40.9$  min,  $t_{\text{minor}} = 62.2$  min.

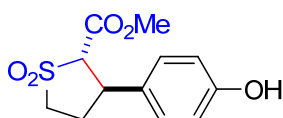

**methyl 3-(4-hydroxyphenyl)tetrahydrothiophene-2-carboxylate 1,1-dioxide (2k):** Product

was purified by flash chromatography with hexanes/EtOAc (1:1) as an eluent ( $R_f = 0.3$ ).  $[\alpha]_D^{20} = -50.214$  ( $c = 0.2$ ,  $\text{CHCl}_3$ ).  $^1\text{H NMR}$  (250 MHz,  $\text{CDCl}_3$ )  $\delta$  7.14-7.02 (m, 2H), 6.81-6.66 (m, 2H), 5.16 (s, 1H), 3.96-3.78 (m, 2H), 3.73 (s, 3H), 3.38 (ddd,  $J = 12.87, 6.91, 1.48$  Hz, 1H), 3.15 (ddd,  $J = 12.92, 6.92, 6.92$  Hz, 1H), 2.51-2.35 (m, 1H), 2.35-2.16 (m, 1H).  $^{13}\text{C NMR}$  (62.5 MHz,  $\text{CDCl}_3$ )  $\delta$  165.386(C), 155.521(C), 130.686(C), 128.482(CH), 116.059(CH), 71.782(CH), 53.599(CH<sub>3</sub>), 53.322(CH<sub>2</sub>), 44.479(CH), 28.579(CH<sub>2</sub>). HRMS (ESI) ( $[\text{M}+\text{Na}]^+$ ) Calcd. for  $\text{C}_{12}\text{H}_{14}\text{NaO}_5\text{S}$ : 293.0454, Found 293.0458. IR (neat,  $\text{cm}^{-1}$ ): 3450.00, 1735.32, 1516.57, 1308.31, 1278.99, 1259.24. HPLC analysis: ee (*trans*) = 91%. Whelk(90% hexanes: 10% isopropanol, 1.0 mL/min) *trans*-isomer:  $t_{\text{major}} = 53.5$  min,  $t_{\text{minor}} = 99.2$  min.

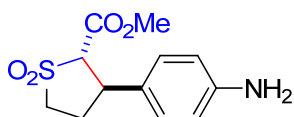

**methyl 3-(4-aminophenyl)tetrahydrothiophene-2-carboxylate 1,1-dioxide (2l):** Product was purified by flash chromatography with hexanes/EtOAc (1:1.3) as an eluent ( $R_f = 0.3$ ).  $[\alpha]_D^{20} = -6.312$  ( $c = 0.2$ ,  $\text{CHCl}_3$ ).  $^1\text{H NMR}$  (250 MHz,  $\text{CDCl}_3$ )  $\delta$  6.99 (d,  $J = 8.11$  Hz, 2H), 6.56 (d,  $J = 8.12$  Hz, 2H), 3.89-3.75 (m, 2H), 3.72 (s, 3H), 3.52 (br, 2H), 3.41-3.31 (m, 1H), 3.13 (ddd,  $J = 12.88, 6.93, 6.93$  Hz, 1H), 2.47-2.32 (m, 1H), 2.32-2.15 (m, 1H).  $^{13}\text{C NMR}$  (62.5 MHz,  $\text{CDCl}_3$ )  $\delta$  165.513(C), 146.186(C), 128.298(C), 128.079(CH), 115.586(CH), 71.896(CH), 53.480(CH<sub>3</sub>), 53.417(CH<sub>2</sub>), 44.597(CH), 28.625(CH<sub>2</sub>). HRMS (ESI) ( $[\text{M}+\text{H}]^+$ ) Calcd. for  $\text{C}_{12}\text{H}_{16}\text{NO}_4\text{S}$ : 270.0795, Found 270.0794. IR (neat,  $\text{cm}^{-1}$ ): 1753.38, 1316.66, 1268.81, 1174.44, 1117.46. HPLC analysis: ee (*trans*) = 83% Whelk(80% hexanes: 20% isopropanol, 1.0 mL/min) *trans*-isomer:  $t_{\text{major}} = 56.8$  min,  $t_{\text{minor}} = 97.0$  min.

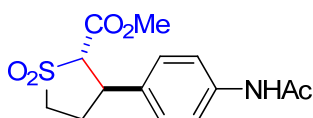

**methyl 3-(4-acetamidophenyl)tetrahydrothiophene-2-carboxylate 1,1-dioxide (2m):** Product was purified by flash chromatography with hexanes/EtOAc (1:2) as an eluent ( $R_f = 0.5$ ).  $[\alpha]_D^{20} = -10.514$  ( $c = 0.2$ ,  $\text{CHCl}_3$ ).  $^1\text{H NMR}$  (250 MHz, acetone- $d_6$ )  $\delta$  9.16 (s, 1H), 7.62 (d,  $J = 8.60$  Hz, 2H), 7.39-7.26 (m, 2H), 4.08 (d,  $J = 11.39$  Hz, 1H), 3.95-3.81 (m, 1H), 3.71 (s, 3H), 3.50 (ddd,  $J = 12.85, 7.26, 1.45$  Hz, 1H), 3.28 (ddd,  $J = 12.75, 7.13, 7.13$  Hz, 1H), 2.62-2.46 (m, 1H), 2.42-

2.23 (m, 1H), 2.06 (s, 3H).  $^{13}\text{C}$  NMR (62.5 MHz, acetone- $d_6$ )  $\delta$  168.890(C), 165.993(C), 140.065(C), 134.894(C), 128.568(CH), 120.337(CH), 72.248(CH), 54.236(CH<sub>2</sub>), 53.386(CH<sub>3</sub>), 45.519(CH), 24.279(CH<sub>2</sub>). HRMS (ESI) ( $[\text{M}+\text{H}]^+$ ) Calcd. for  $\text{C}_{14}\text{H}_{18}\text{NO}_5\text{S}$ : 312.0900, Found 312.0903. IR (neat,  $\text{cm}^{-1}$ ): 1735.40, 1666.60, 1532.49, 1515.06, 1414.01, 1311.41. HPLC analysis: ee (*trans*) = 92%. Whelk(60% hexanes: 40% isopropanol, 1.0 mL/min) *trans*-isomer:  $t_{\text{major}} = 34.7$  min,  $t_{\text{minor}} = 49.2$  min.

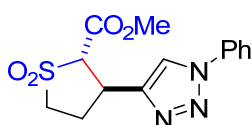

**methyl 3-(1-phenyl-1H-1,2,3-triazol-4-yl)tetrahydrothiophene-2-carboxylate 1,1-dioxide (2n):** Product was purified by flash chromatography with hexanes/EtOAc (1:2) as an eluent ( $R_f = 0.6$ ).  $[\alpha]_D^{20} = -23.511$  ( $c = 0.2$ ,  $\text{CHCl}_3$ ).  $^1\text{H}$  NMR (250 MHz,  $\text{CDCl}_3$ )  $\delta$  7.89 (s, 1H), 7.64 (d,  $J = 7.51$  Hz, 2H), 7.49-7.38 (m, 3H), 4.28 (d,  $J = 10.45$  Hz, 1H), 4.19-4.08 (m, 1H), 3.77 (s, 3H), 3.50-3.40 (m, 1H), 3.30-3.15 (m, 1H), 2.68-2.53 (m, 2H).  $^{13}\text{C}$  NMR (62.5 MHz,  $\text{CDCl}_3$ )  $\delta$  163.972(C), 144.934(C), 135.796(C), 128.858(CH), 128.060(CH), 119.549(CH), 119.055(CH), 68.945(CH), 52.636(CH<sub>3</sub>), 51.735(CH<sub>2</sub>), 35.174(CH), 25.553(CH<sub>2</sub>). HRMS (ESI) ( $[\text{M}+\text{H}]^+$ ) Calcd. for  $\text{C}_{14}\text{H}_{16}\text{N}_3\text{O}_4\text{S}$ : 322.0856, Found 322.0861. IR (neat,  $\text{cm}^{-1}$ ): 1747.40, 1314.99, 1265.19, 1231.85, 1172.84. HPLC analysis: ee (*trans*) = 87%. Whelk(80% hexanes: 20% isopropanol, 1.0 mL/min) *trans*-isomer:  $t_{\text{major}} = 65.4$  min,  $t_{\text{minor}} = 102.2$  min.

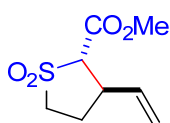

**methyl 3-vinyltetrahydrothiophene-2-carboxylate 1,1-dioxide (2o):** Product was purified by flash chromatography with hexanes/EtOAc (3:1) as an eluent ( $R_f = 0.4$ ).  $[\alpha]_D^{20} = -48.060$  ( $c = 0.2$ ,  $\text{CHCl}_3$ ).  $^1\text{H}$  NMR (250 MHz,  $\text{CDCl}_3$ )  $\delta$  5.70 (ddd,  $J = 17.22, 10.24, 7.06$  Hz, 1H), 5.22-5.09 (m, 2H), 3.79 (s, 3H), 3.67 (d,  $J = 10.25$  Hz, 1H), 3.41-3.22 (m, 2H), 3.07 (dt,  $J = 12.61, 7.01$  Hz, 1H), 2.41-2.23 (m, 1H), 2.05-1.87 (m, 1H).  $^{13}\text{C}$  NMR (62.5 MHz,  $\text{CDCl}_3$ )  $\delta$  165.038(C), 135.561(CH), 118.085(CH<sub>2</sub>), 69.816(CH), 53.498(CH<sub>3</sub>), 52.621(CH<sub>2</sub>), 43.232(CH), 26.547(CH<sub>2</sub>). HRMS (ESI( $[\text{M}+\text{Na}]^+$ )) Calcd. for  $\text{C}_8\text{H}_{12}\text{NaO}_4\text{S}$ : 277.0349, Found 277.0352. IR (neat,  $\text{cm}^{-1}$ ): 1732.54, 1357.71, 1314.60, 1285.74, 1264.76. HPLC analysis: ee (*trans*) = 78%.

AD-H(97% hexanes: 3% isopropanol, 1.0 mL/min) *trans*-isomer:  $t_{major} = 48.3$  min,  $t_{minor} = 25.2$  min.

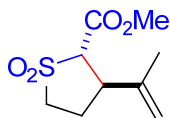

**methyl 3-(prop-1-en-2-yl)tetrahydrothiophene-2-carboxylate 1,1-dioxide (2p):** Product was purified by flash chromatography with hexanes/EtOAc (3:1) as an eluent ( $R_f = 0.4$ ).  $[\alpha]_D^{20} = -45.548$  ( $c = 0.2$ ,  $\text{CHCl}_3$ ).  $^1\text{H NMR}$  (250 MHz,  $\text{CDCl}_3$ )  $\delta$  4.87 (s, 1H), 4.83 (s, 1H), 3.80 (d,  $J = 10.25$  Hz, 1H), 3.79 (s, 3H), 3.43-3.22 (m, 2H), 3.06 (dt,  $J = 12.74$ , 6.81 Hz, 1H), 2.39-2.23 (m, 1H), 2.12-1.93 (m, 1H), 1.70 (s, 3H).  $^{13}\text{C NMR}$  (62.5 MHz,  $\text{CDCl}_3$ )  $\delta$  165.502(C), 141.774(C), 113.597( $\text{CH}_2$ ), 68.901(CH), 53.525( $\text{CH}_3$ ), 52.836( $\text{CH}_2$ ), 46.306(CH), 25.769( $\text{CH}_2$ ), 20.083( $\text{CH}_3$ ). HRMS (ESI) ( $[\text{M}+\text{H}]^+$ ) Calcd. for  $\text{C}_9\text{H}_{15}\text{O}_4\text{S}$ : 219.0686, Found 219.0679. IR (neat,  $\text{cm}^{-1}$ ): 1743.86, 1436.32, 1316.73, 1274.53, 1170.36, 1149.15. HPLC analysis: ee (*trans*) = 80%. AD-H (90% hexanes: 10% isopropanol, 1.0 mL/min) *trans*-isomer:  $t_{major} = 12.6$  min,  $t_{minor} = 10.0$  min.

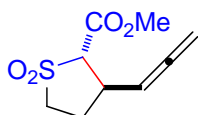

**methyl 3-(propa-1,2-dien-1-yl)tetrahydrothiophene-2-carboxylate 1,1-dioxide (2q):** Product was purified by flash chromatography with hexanes/EtOAc (3:1) as an eluent ( $R_f = 0.4$ ).  $[\alpha]_D^{20} = -29.450$  ( $c = 0.2$ ,  $\text{CHCl}_3$ ).  $^1\text{H NMR}$  (250 MHz,  $\text{CDCl}_3$ )  $\delta$  5.24 (dd,  $J = 12.40$ , 6.60 Hz, 1H), 4.90 (ddd,  $J = 6.49$ , 3.16, 1.02 Hz, 2H), 3.84 (s, 3H), 3.79 (d,  $J = 9.75$  Hz, 1H), 3.44-3.35 (m, 1H), 3.32 (ddd,  $J = 12.75$ , 7.42, 3.14 Hz, 1H), 3.13 (ddd,  $J = 12.91$ , 11.50, 7.05 Hz, 1H), 2.45-2.37 (m, 1H), 2.07-1.96 (m, 1H).  $^{13}\text{C NMR}$  (62.5 MHz,  $\text{CDCl}_3$ )  $\delta$  207.490(C), 164.958(C), 89.899(CH), 78.923( $\text{CH}_2$ ), 69.881(CH), 53.467( $\text{CH}_3$ ), 52.634( $\text{CH}_2$ ), 37.853(CH), 26.625( $\text{CH}_2$ ). HRMS (ESI) ( $[\text{M}+\text{Na}]^+$ ) Calcd. for  $\text{C}_9\text{H}_{12}\text{O}_4\text{SNa}$ : 239.0349, Found 239.0353. IR (neat,  $\text{cm}^{-1}$ ): 1732.62, 1305.28, 1278.21, 1116.17, 868.22. HPLC analysis: ee (*trans*) = 83%. AD-H (95% hexanes: 5% isopropanol, 1.0 mL/min) *trans*-isomer:  $t_{major} = 22.0$  min,  $t_{minor} = 30.3$  min.

## Catalyst Controlled Olefin Isomerization to probe the Radical Mechanism of Co(II)-Catalyzed C–H Alkylation

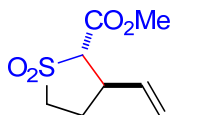

**methyl (E)-3-(prop-1-en-1-yl)tetrahydrothiophene-2-carboxylate 1,1-dioxide (2r):** Product was purified by flash chromatography with hexanes/EtOAc (3:1) as an eluent ( $R_f = 0.4$ ).  $^1\text{H}$  NMR (500 MHz,  $\text{CDCl}_3$ )  $\delta$  5.67 (dq,  $J = 15.0, 6.48, 0.96$  Hz, 1H), **5.34 (ddq,  $J = 15.23, 7.53, 1.56$  Hz, 1H)**, 3.84 (s, 1H), 3.67 (d,  $J = 10.37$  Hz, 1H), 3.40-3.33 (m, 1H), 3.31 (ddd,  $J = 12.99, 7.14, 1.55$  Hz, 1H), 2.36-2.30 (m, 1H), 1.97 (ddd,  $J = 25.59, 12.57, 7.21$  Hz, 1H), 1.67 (dd,  $J = 6.50, 0.96$  Hz, 1H).  $^{13}\text{C}$  NMR (125 MHz,  $\text{CDCl}_3$ )  $\delta$  165.129(C), 129.300(CH), 128.394(CH), 70.219(CH), 53.405(CH<sub>3</sub>), 52.735(CH<sub>2</sub>), 42.707(CH), 27.103(CH<sub>2</sub>), 17.887(CH<sub>3</sub>). HRMS (ESI) ( $[\text{M}+\text{Na}]^+$ ) Calcd. for  $\text{C}_9\text{H}_{14}\text{O}_4\text{SNa}$ : 241.0505, Found 241.0510. IR (neat,  $\text{cm}^{-1}$ ): 1733.29, 1438.38, 1318.28, 1267.95, 1175.48, 1118.27.

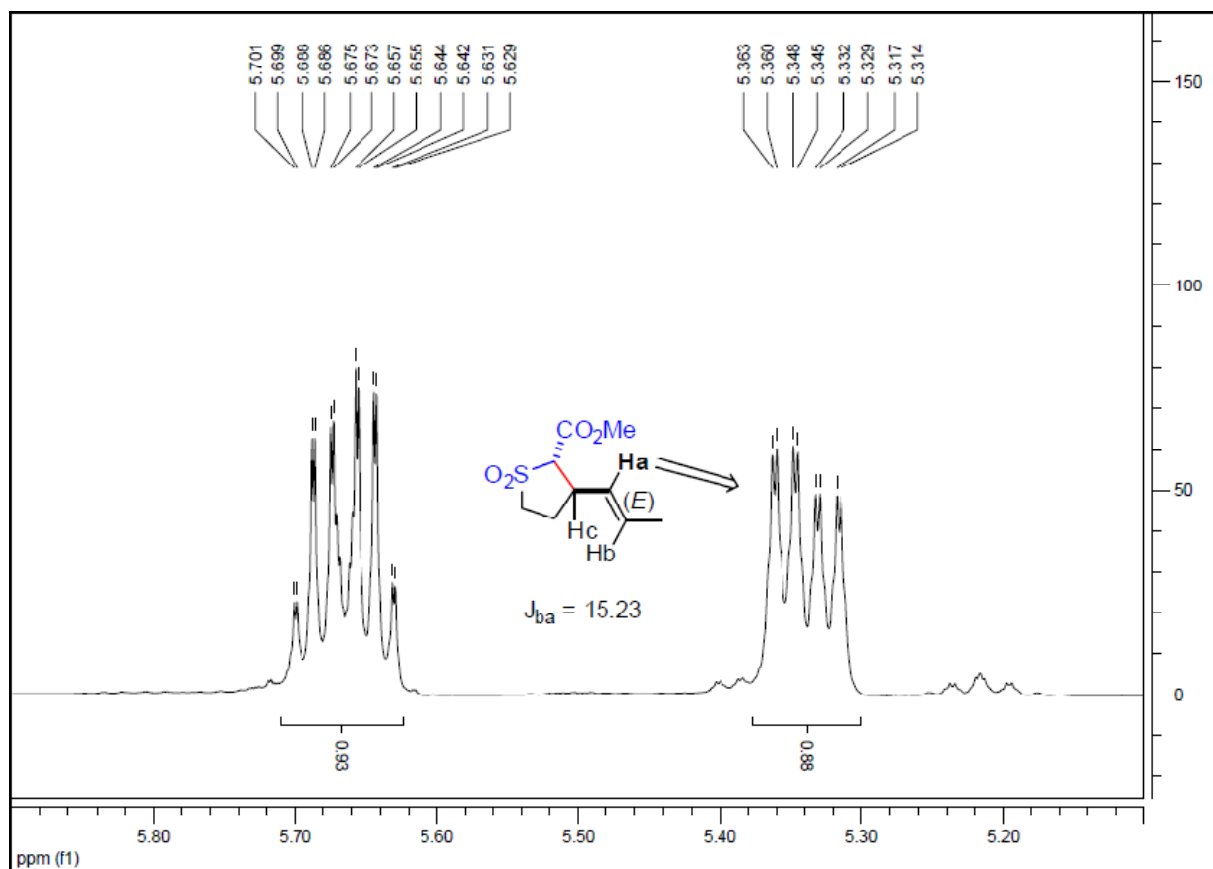



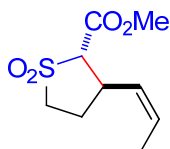

**methyl (Z)-3-(prop-1-en-1-yl)tetrahydrothiophene-2-carboxylate 1,1-dioxide (2s):** Product was purified by flash chromatography with hexanes/EtOAc (3:1) as an eluent ( $R_f = 0.4$ ).  $^1\text{H}$  NMR (500 MHz,  $\text{CDCl}_3$ )  $\delta$  5.72-5.60 (m, 1H), **5.22 (ddq,  $J = 10.89, 9.38, 1.78$  Hz, 1H)**, 3.84 (s, 1H), 3.79-3.72 (m, 1H), 3.65 (d,  $J = 10.11$  Hz, 1H), 3.33 (ddd,  $J = 12.94, 7.28, 1.86$  Hz, 1H), 3.15 (dt,  $J = 12.80, 7.13$  Hz, 1H), 2.33-2.26 (m, 1H), 1.99-1.89 (m, 1H), 1.72 (dd,  $J = 6.95, 1.80$  Hz, 1H).  $^{13}\text{C}$  NMR (125 MHz,  $\text{CDCl}_3$ )  $\delta$  165.189(C), 129.068(CH), 127.963(CH), 70.355(CH), 53.416(CH<sub>3</sub>), 52.684(CH<sub>2</sub>), 37.879(CH), 27.189(CH<sub>2</sub>), 13.214(CH<sub>3</sub>). HRMS (ESI) ( $[\text{M}+\text{Na}]^+$ ) Calcd. for  $\text{C}_9\text{H}_{14}\text{O}_4\text{SNa}$ : 241.0505, Found 241.0511. IR (neat,  $\text{cm}^{-1}$ ): 1733.59, 1438.48, 1312.26, 1268.89, 1172.53, 1117.23.

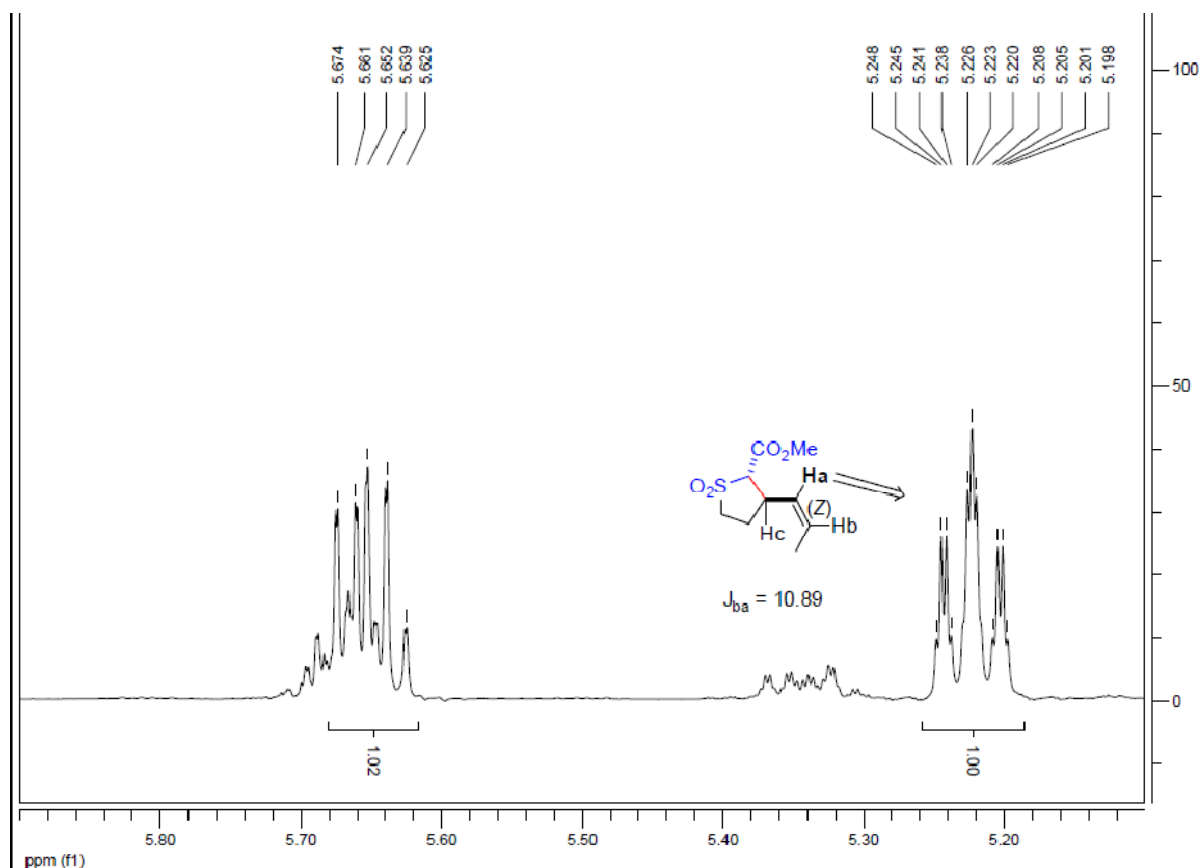

| entry | diazo                                                                             | [Co(P)]  | yield (%) <sup>b</sup> | 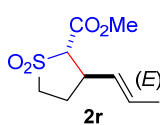 |  |
|-------|-----------------------------------------------------------------------------------|----------|------------------------|------------------------------------------------------------------------------------|-------------------------------------------------------------------------------------|
| 1     |  | [Co(P3)] | 94                     | 95                                                                                 | : 5                                                                                 |
| 2     |  | [Co(P4)] | 96                     | 89                                                                                 | : 11                                                                                |
| 3     |  | [Co(P5)] | 96                     | 82                                                                                 | : 18                                                                                |
| 4     |  | [Co(P3)] | 92                     | 18                                                                                 | : 82                                                                                |
| 5     |  | [Co(P4)] | 94                     | 49                                                                                 | : 51                                                                                |
| 6     |  | [Co(P5)] | 95                     | 77                                                                                 | : 23                                                                                |

The ratio of compound **2r** and **2s** in entries 1-6 were determined by <sup>1</sup>HNMR of their mixtures. The proton of **2r** at 5.34ppm and proton of **2s** at 5.22ppm were selected for the determination.

### Entry 1:

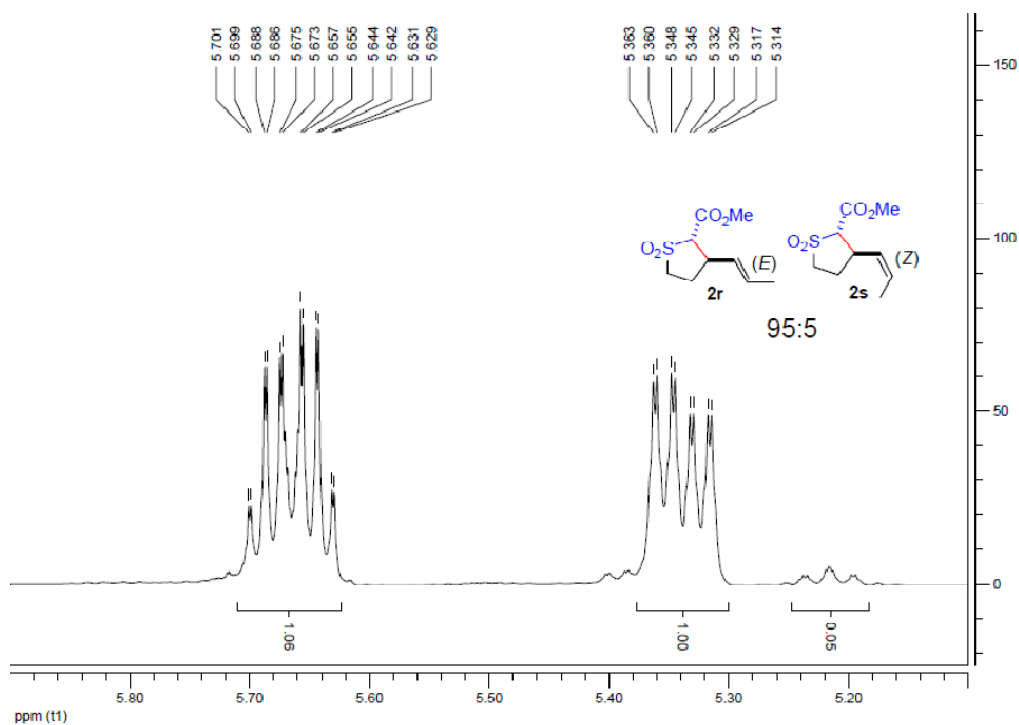

### Entry 2:

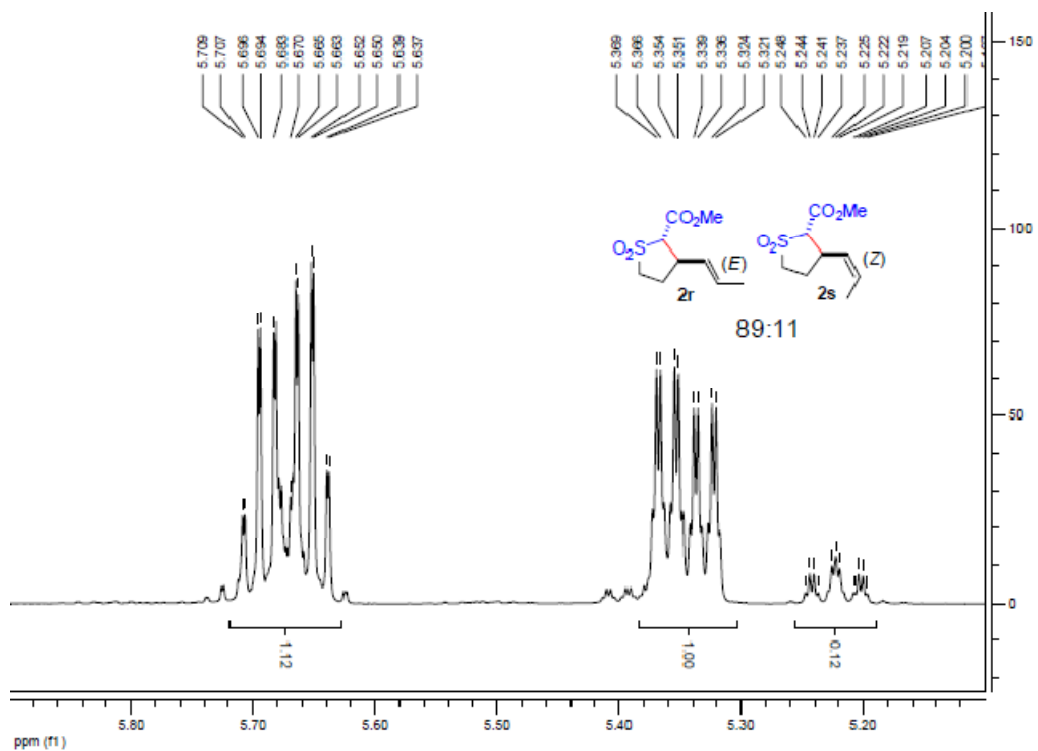

**Entry 3:**

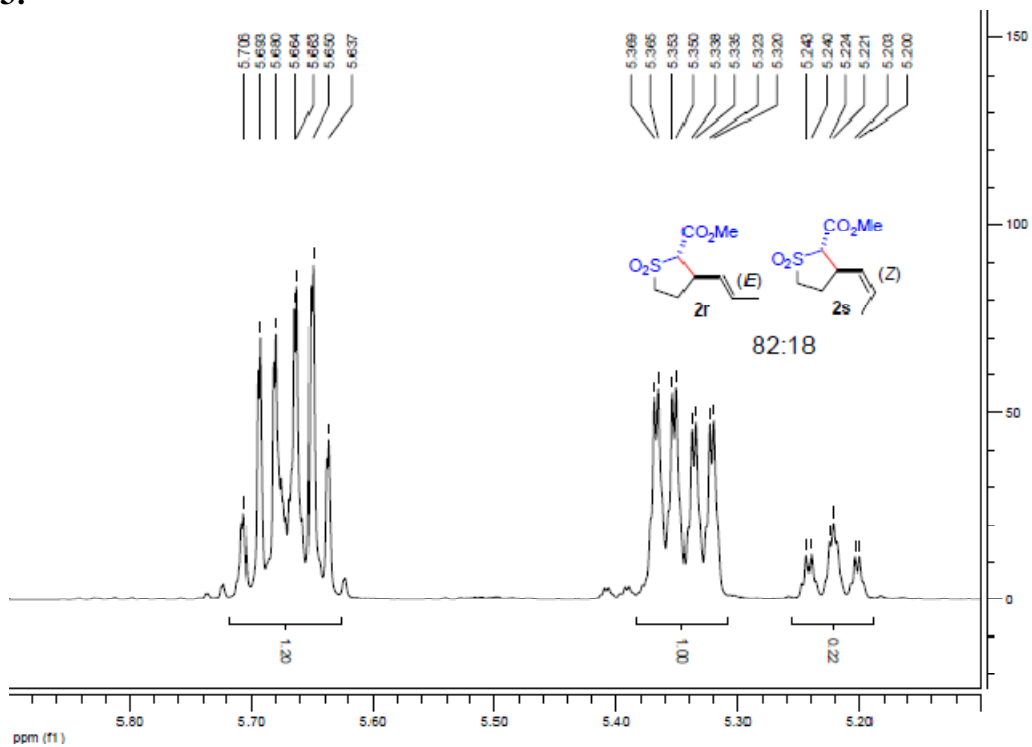

**Entry 4:**

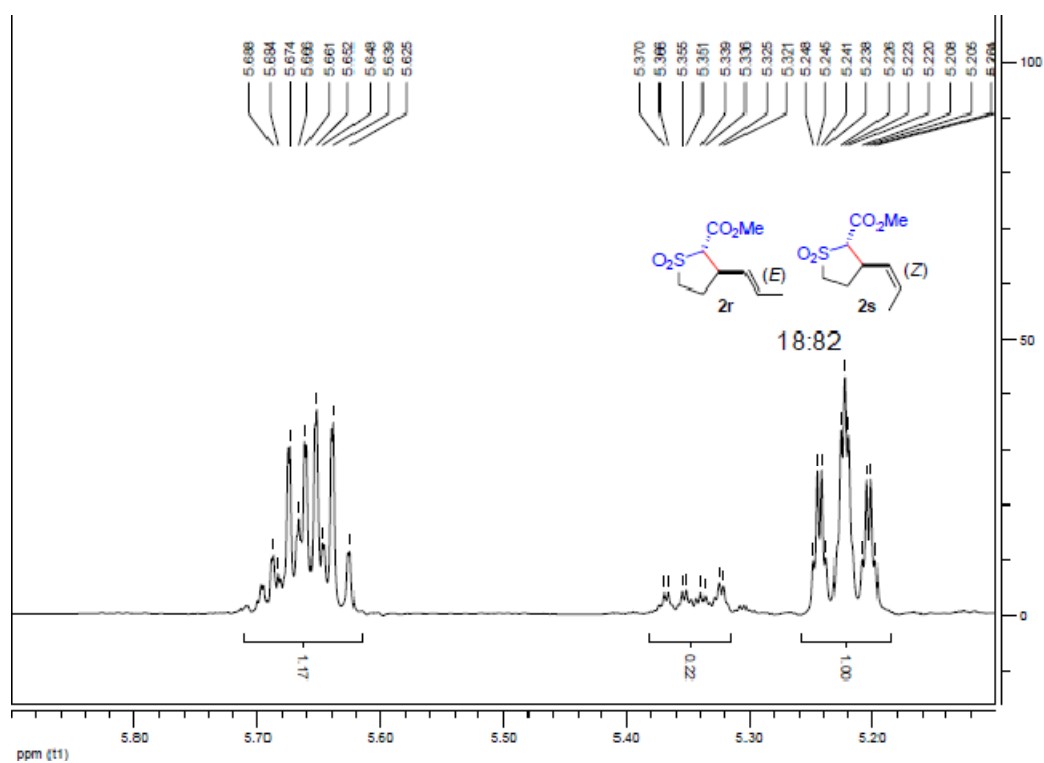

**Entry 5:**

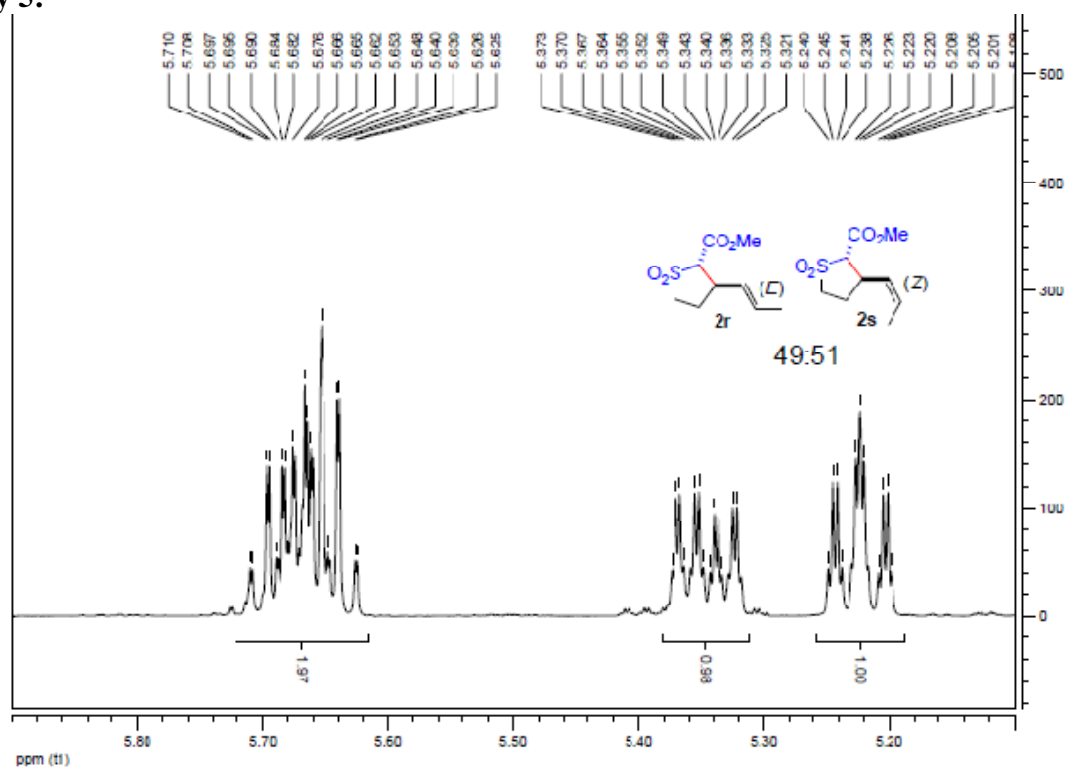

**Entry 6:**

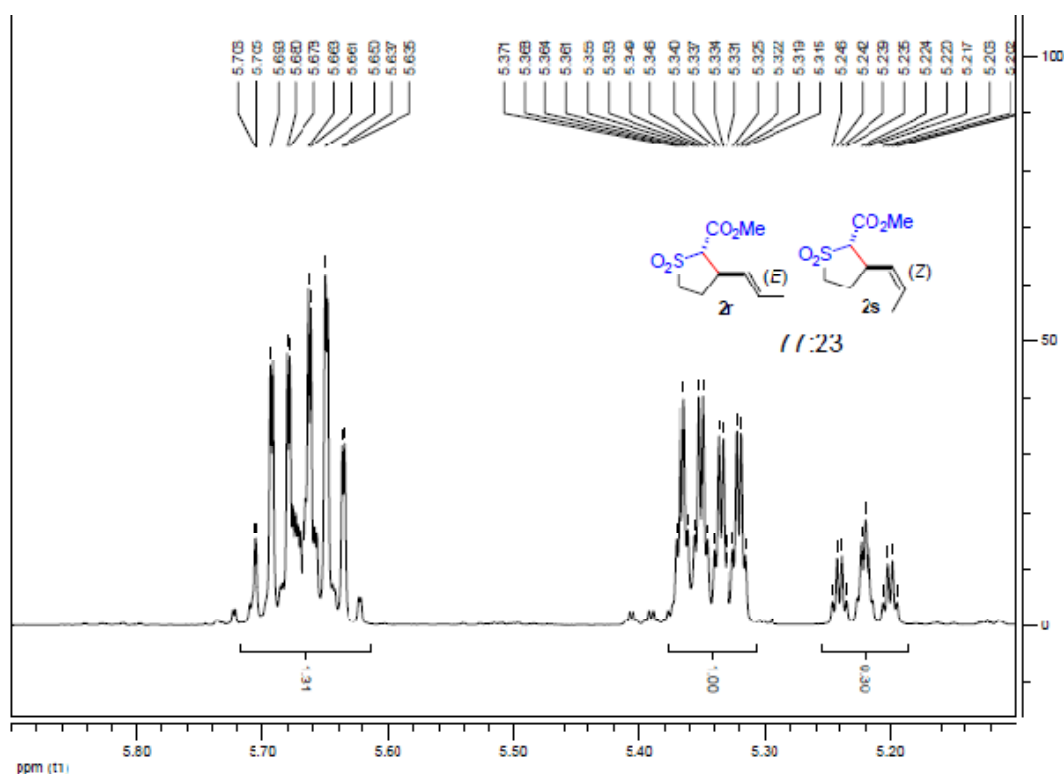

## Diastereocontrolled Electrophilic Substitution Reaction of Sulfolanes **2**.

Sulfolane **2** (0.1 mmol) in 1 mL of THF was treated with 1.2 equiv of NaH in THF at room temperature for 20 min, then 1.1 equiv of electrophile was added. The reaction mixture was stirred overnight and concentrated to remove THF, followed by purification of the residue by column chromatography to afford the desired product.

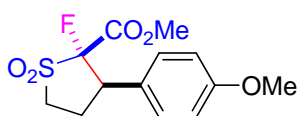

### **methyl 2-fluoro-3-(4-methoxyphenyl)tetrahydrothiophene-2-carboxylate 1,1-dioxide (3ia):**

Product was purified by flash chromatography with hexanes/EtOAc (2:1) as an eluent ( $R_f = 0.3$ ).  $[\alpha]_D^{20} = -45.766$  ( $c = 0.2$ ,  $\text{CHCl}_3$ ).  $^1\text{H NMR}$  (600 MHz,  $\text{CDCl}_3$ )  $\delta$  7.15 (d,  $J = 8.46$  Hz, 2H), 6.81 (d,  $J = 8.56$  Hz, 2H), 3.73 (s, 3H), 3.71-3.67 (m, 1H), 3.59 (s, 3H), 3.55 (dd,  $J = 13.10, 8.84$  Hz, 1H), 3.36-3.26 (m, 1H), 2.87-2.75 (m, 1H), 2.44-2.40 (m, 1H).  $^{13}\text{C NMR}$  (62.5 MHz,  $\text{CDCl}_3$ )  $\delta$  163.219 (d,  $J = 26.6$  Hz, C), 159.760(C), 128.916(C), 125.600(CH), 114.308(CH), 105.313 (d,  $J = 243$  Hz, CF), 55.346(CH<sub>3</sub>), 53.449(CH<sub>3</sub>), 50.526(CH<sub>2</sub>), 48.371 (d,  $J = 18.2$  Hz, CH),

21.145 (d,  $J = 6.9$  Hz, CH<sub>2</sub>). HRMS (ESI) ( $[M+NH_4]^+$ ) Calcd. for C<sub>13</sub>H<sub>19</sub>FNO<sub>5</sub>S: 320.0962, Found 320.0975. IR (neat, cm<sup>-1</sup>): 1749.36, 1516.61, 1320.83, 1250.19, 1227.75. HPLC analysis: ee (*trans*) = 95%. Whelk(90% hexanes: 10% isopropanol, 1.0 mL/min) *trans*-isomer:  $t_{major} = 35.8$  min,  $t_{minor} = 40.9$  min.

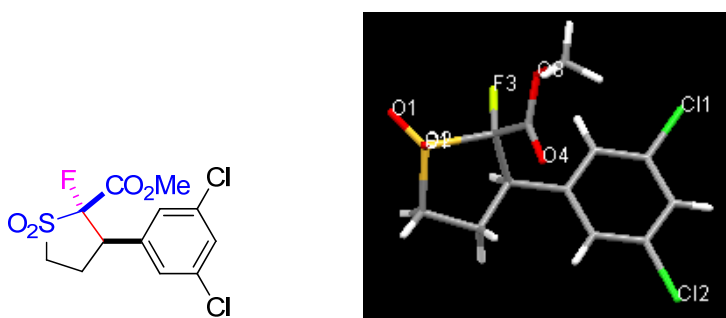

**(2R,3R)-methyl 3-(3,5-dichlorophenyl)-2-fluorotetrahydrothiophene-2-carboxylate 1,1-dioxide (3ea):** Product was purified by flash chromatography with hexanes/EtOAc (3:1) as an eluent ( $R_f = 0.4$ ).  $[\alpha]_D^{20} = -22.375$  ( $c = 0.2$ , CHCl<sub>3</sub>). <sup>1</sup>H NMR (600 MHz, CDCl<sub>3</sub>)  $\delta$  7.32 (s, 1H), 7.18 (s, 2H), 3.77-3.72 (m, 1H), 3.70 (s, 3H), 3.63-3.60 (m, 1H), 3.39-3.34 (m, 1H), 2.84-2.80 (m, 1H), 2.54-2.49 (m, 1H). <sup>13</sup>C NMR (62.5 MHz, CDCl<sub>3</sub>)  $\delta$  163.780 (d,  $J = 26.4$  Hz, C), 137.356(C), 135.610(C), 128.992(CH), 126.363(CH), 104.562 (d,  $J = 245$  Hz, CF), 53.784(CH<sub>3</sub>), 50.246(CH<sub>2</sub>), 48.137 (d,  $J = 18.3$  Hz, CH), 20.951 (d,  $J = 6.7$  Hz, CH<sub>2</sub>). HRMS (ESI) ( $[M+NH_4]^+$ ) Calcd. for C<sub>12</sub>H<sub>15</sub>Cl<sub>2</sub>FNO<sub>4</sub>S: 358.0077, Found 358.0085. IR (neat, cm<sup>-1</sup>): 1750.32, 1567.36, 1434.67, 1333.53, 1285.06, 1252.27. . HPLC analysis: ee (*trans*) = 84%. AD-H(98% hexanes: 2% isopropanol, 1.0 mL/min) *trans*-isomer:  $t_{major} = 57.0$  min,  $t_{minor} = 69.4$  min.

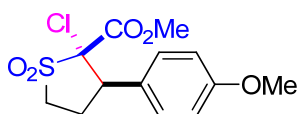

**methyl 2-chloro-3-(4-methoxyphenyl)tetrahydrothiophene-2-carboxylate 1,1-dioxide (3ib):** Product was purified by flash chromatography with hexanes/EtOAc (2:1) as an eluent ( $R_f = 0.4$ ).  $[\alpha]_D^{20} = -62.588$  ( $c = 0.2$ , CHCl<sub>3</sub>). <sup>1</sup>H NMR (600 MHz, CDCl<sub>3</sub>)  $\delta$  7.18 (d,  $J = 8.78$  Hz, 2H), 6.82 (d,  $J = 8.57$  Hz, 2H), 3.74 (s, 3H), 3.72-3.66 (m, 2H), 3.65 (s, 3H), 3.40 (ddd,  $J = 13.29$ , 9.81, 7.33 Hz, 1H), 2.94-2.87 (m, 1H), 2.44-2.35 (m, 1H). <sup>13</sup>C NMR (62.5 MHz, CDCl<sub>3</sub>)  $\delta$  164.186(C), 160.046(C), 129.834(C), 125.669(CH), 114.264(CH), 85.796(C), 55.358(CH<sub>3</sub>),

54.238(CH<sub>3</sub>), 52.501(CH<sub>2</sub>), 49.555(CH), 24.216(CH<sub>2</sub>). HRMS (ESI) ([M+Na]<sup>+</sup>) Calcd. for C<sub>13</sub>H<sub>15</sub>ClNaO<sub>5</sub>S: 341.0221, Found 341.0225. IR (neat, cm<sup>-1</sup>): 1755.60, 1727.23, 1514.36, 1329.24, 1248.40. HPLC analysis: ee (*trans*) = 93%. OD-H(90% hexanes: 10% isopropanol, 1.0 mL/min) *trans*-isomer: *t*<sub>major</sub> = 38.7 min, *t*<sub>minor</sub> = 30.9 min.

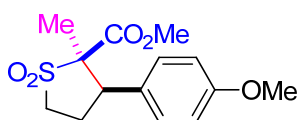

**methyl 3-(4-methoxyphenyl)-2-methyltetrahydrothiophene-2-carboxylate 1,1-dioxide (3ic):**

Product was purified by flash chromatography with hexanes/EtOAc (3:1) as an eluent (R<sub>f</sub> = 0.5). [α]<sub>D</sub><sup>20</sup> = -33.609 (*c* = 0.2, CHCl<sub>3</sub>). <sup>1</sup>H NMR (600 MHz, CDCl<sub>3</sub>) δ 7.11 (d, *J* = 8.50 Hz, 2H), 6.85 (d, *J* = 8.57 Hz, 2H), 3.78 (s, 3H), 3.69 (dt, *J* = 13.27, 3.27 Hz, 1H), 3.65 (s, 3H), 3.35 (dd, *J* = 12.40, 7.51 Hz, 1H), 3.32-3.28 (m, 1H), 2.93-2.86 (m, 1H), 2.41-2.30 (m, 1H), 1.48 (s, 3H). <sup>13</sup>C NMR (62.5 MHz, CDCl<sub>3</sub>) δ 167.822(C), 159.646(C), 129.589(C), 127.790(CH), 114.259(CH), 70.789(C), 55.347(CH<sub>3</sub>), 52.940(CH<sub>3</sub>), 50.806(CH<sub>3</sub>), 50.185(CH<sub>2</sub>), 25.043(CH), 14.005(CH<sub>2</sub>). HRMS (ESI) ([M+H]<sup>+</sup>) Calcd. for C<sub>14</sub>H<sub>19</sub>O<sub>5</sub>S: 299.0948, Found 299.0962. IR (neat, cm<sup>-1</sup>): 1727.50, 1514.10, 1454.10, 1306.83, 1278.19, 1248.58. HPLC analysis: ee (*trans*) = 93%. AD-H(95% hexanes: 5% isopropanol, 1.0 mL/min) *trans*-isomer: *t*<sub>major</sub> = 27.0 min, *t*<sub>minor</sub> = 22.8 min.

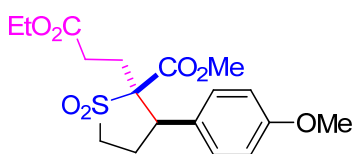

**methyl 2-(3-ethoxy-3-oxopropyl)-3-(4-methoxyphenyl)tetrahydrothiophene-2-carboxylate 1,1-dioxide (3id):**

Product was purified by flash chromatography with hexanes/EtOAc (2:1) as an eluent (R<sub>f</sub> = 0.2). [α]<sub>D</sub><sup>20</sup> = -4.019 (*c* = 0.2, CHCl<sub>3</sub>). <sup>1</sup>H NMR (600 MHz, CDCl<sub>3</sub>) δ 7.06 (d, *J* = 8.43 Hz, 2H), 6.84 (d, *J* = 8.49 Hz, 2H), 4.11-4.05 (m, 2H), 3.78 (s, 3H), 3.72 (ddd, *J* = 12.80, 2.93, 1.06 Hz, 1H), 3.66 (s, 3H), 3.48 (dd, *J* = 12.30, 7.47 Hz, 1H), 3.35-3.26 (m, 1H), 2.83-2.69 (m, 2H), 2.54-2.41 (m, 1H), 2.38-2.35 (m, 1H), 2.32-2.25 (m, 1H), 2.23-2.17 (m, 1H), 1.20 (t, *J* = 7.13 Hz, 3H). <sup>13</sup>C NMR (62.5 MHz, CDCl<sub>3</sub>) δ 172.612(C), 167.016(C), 159.814(C),

129.288(C), 127.412(CH), 114.367(CH), 73.254(CH), 60.614(CH<sub>2</sub>), 55.360(CH<sub>3</sub>), 52.814(CH<sub>3</sub>), 51.555(CH<sub>2</sub>), 50.943(CH), 28.658(CH<sub>2</sub>), 25.685(CH<sub>2</sub>), 24.976(CH<sub>2</sub>), 14.227(CH<sub>3</sub>). HRMS (ESI) ([M+NH<sub>4</sub>]<sup>+</sup>) Calcd. for C<sub>18</sub>H<sub>25</sub>O<sub>7</sub>S: 385.1316, Found 385.1326. IR (neat, cm<sup>-1</sup>): 1738.97, 1675.99, 1264.64, 1190.13, 1029.01. HPLC analysis: ee (*trans*) = 93%. AD-H(90% hexanes: 10% isopropanol, 1.0 mL/min) *trans*-isomer:  $t_{major}$  = 36.0 min,  $t_{minor}$  = 20.4 min.



## References

- (1) Chen, Y.; Zhang, X. P. *J. Org. Chem.* **2007**, *72*, 5931.
- (2) Xu, X.; Lu, H. J.; Ruppel, J. V.; Cui, X.; de Mesa, S. L.; Wojtas, L.; Zhang, X. P. *J. Am. Chem. Soc.* **2011**, *133*, 15292.
- (3) Chen, Y.; Fields, K. B.; Zhang, X. P. *J. Am. Chem. Soc.* **2004**, *126*, 14718.
- (4) Casarini, D.; Lunazzi, L.; Mazzanti, A. *J. Org. Chem.* **2008**, *73*, 2811.
- (5) Flynn, C. J.; Elcoate, C. J.; Lawrence, S. E.; Maguire, A. R. *J. Am. Chem. Soc.* **2010**, *132*, 1184.
- (6) Blankespoor, R. L.; DeVries, T.; Hansen, E.; Kallemeyn, J. M.; Klooster, A. M.; Mulder, J. A.; Smart, R. P.; Griend, D. A. V. *J. Org. Chem.* **2002**, *67*, 2677.
- (7) Milczek, E.; Boudet, N.; Blakey, S. *Angew. Chem., Int. Ed.* **2008**, *47*, 6825.
- (8) Ranta, J.; Kumpulainen, T.; Lemmetyinen, H.; Efimov, A. *J. Org. Chem.* **2010**, *75*, 5178.
- (9) Houjeiry, T. I.; Poe, S. L.; McQuade, D. T. *Org. Lett.* **2012**, *14*, 4394.
- (10) Liang, H.; Ciufolini, M. A. *Chemistry-a European Journal* **2010**, *16*, 13262.
- (11) Chen, S. PCT Int. Appl., 2008106204, 04 Sep 2008
- (12) Crandall, J. K.; Conover, W. W.; Komin, J. B. *J. Org. Chem.* **1975**, *40*, 2042.
- (13) Jung, J. C.; Kache, R.; Vines, K. K.; Zheng, Y. S.; Bijoy, P.; Valluri, M.; Avery, M. A. *J. Org. Chem.* **2004**, *69*, 9269.
- (14) Trost, B. M.; Pinkerton, A. B.; Seidel, M. *J. Am. Chem. Soc.* **2001**, *123*, 12466.

## X-ray Crystallography

The X-ray diffraction data were collected using Bruker-AXS SMART-APEXII CCD diffractometer (CuK $\alpha$ ,  $\lambda = 1.54178 \text{ \AA}$ ). Indexing was performed using *APEX2* [1] (Difference Vectors method). Data integration and reduction were performed using SaintPlus 6.01 [2]. Absorption correction was performed by multi-scan method implemented in SADABS [3]. Space groups were determined using XPREP implemented in APEX2 [1]. The structure was solved using SHELXS-97 (direct methods) and refined using SHELXL-97 (full-matrix least-squares on  $F^2$ ) contained in APEX2 [1] and WinGX v1.70.01 [4,5,6,7] programs packages. All non-hydrogen atoms were refined anisotropically. Hydrogen atoms were placed in geometrically calculated positions or found in the Fourier difference map and included in the refinement process using riding model with isotropic thermal parameters: Uiso(H) = 1.5Ueq(-CH<sub>3</sub>), Uiso(H) = 1.2Ueq(-CH<sub>2</sub>, -CH) or without constraints (H1A and H1B in **L1**). For **L1** the absolute configuration has been established by the structure determination of a compound containing a chiral reference molecule of known absolute configuration (Chen, Y.; Zhang, X. P. *J. Org. Chem.* **2007**, *72*, 5931.). Crystal data and refinement conditions are shown in Table 1, 2 and 3.

[1] Bruker (2008). *APEX2* (Version 2008.1-0). Bruker AXS Inc., Madison, Wisconsin, USA.

[2] Bruker (2001b). SAINT-V6.28A. Data Reduction Software.

[3] Sheldrick, G. M. (1996). *SADABS. Program for Empirical Absorption Correction*. University of Gottingen, Germany.

[4] Farrugia L.J. *Appl. Cryst.* (1999). *32*, 837-838

[5] Sheldrick, G.M. (1997) SHELXL-97. Program for the Refinement of Crystal

[6] Sheldrick, G.M. (1990) *Acta Cryst.* *A46*, 467-473

[7] Sheldrick, G. M. (2008). *Acta Cryst.* *A64*, 112-122.

| Table 1. Crystal data and structure refinement for compound <b>L1</b> |                                                                                                                       |
|-----------------------------------------------------------------------|-----------------------------------------------------------------------------------------------------------------------|
| Identification code                                                   | <b>L1</b>                                                                                                             |
| Empirical formula                                                     | C <sub>14</sub> H <sub>19</sub> N O                                                                                   |
| Formula weight                                                        | 217.30                                                                                                                |
| Temperature                                                           | 228(2) K                                                                                                              |
| Wavelength                                                            | 1.54178 Å                                                                                                             |
| Crystal system, space group                                           | Monoclinic, C2                                                                                                        |
| Unit cell dimensions                                                  | a = 7.0592(2) Å    alpha = 90 deg.<br>b = 9.6718(3) Å    beta = 91.179(2) deg.<br>c = 18.5618(6) Å    gamma = 90 deg. |
| Volume                                                                | 1267.04(7) Å <sup>3</sup>                                                                                             |
| Z, Calculated density                                                 | 4, 1.139 Mg/m <sup>3</sup>                                                                                            |
| Absorption coefficient                                                | 0.552 mm <sup>-1</sup>                                                                                                |
| F(000)                                                                | 472                                                                                                                   |
| Crystal size                                                          | 0.20 x 0.02 x 0.02 mm                                                                                                 |
| Theta range for data collection                                       | 4.77 to 65.96 deg.                                                                                                    |
| Limiting indices                                                      | -8 ≤ h ≤ 8, -10 ≤ k ≤ 8, -21 ≤ l ≤ 21                                                                                 |
| Reflections collected / unique                                        | 6867 / 1913 [R(int) = 0.0270]                                                                                         |
| Completeness to theta = 65.96                                         | 98.3 %                                                                                                                |
| Absorption correction                                                 | Semi-empirical from equivalents                                                                                       |
| Max. and min. transmission                                            | 0.9918 and 0.8976                                                                                                     |
| Refinement method                                                     | Full-matrix least-squares on F <sup>2</sup>                                                                           |
| Data / restraints / parameters                                        | 1913 / 1 / 156                                                                                                        |
| Goodness-of-fit on F <sup>2</sup>                                     | 1.082                                                                                                                 |
| Final R indices [I > 2σ(I)]                                           | R1 = 0.0383, wR2 = 0.1005                                                                                             |
| R indices (all data)                                                  | R1 = 0.0408, wR2 = 0.1025                                                                                             |
| Absolute structure parameter                                          | -0.4(3)                                                                                                               |
| Largest diff. peak and hole                                           | 0.123 and -0.160 e.Å <sup>-3</sup>                                                                                    |

| Table 2. Crystal data and structure refinement for compound <b>2g</b> |                                                                                                                          |
|-----------------------------------------------------------------------|--------------------------------------------------------------------------------------------------------------------------|
| Identification code                                                   | <b>2g</b>                                                                                                                |
| Empirical formula                                                     | C <sub>12</sub> H <sub>14</sub> O <sub>4</sub> S                                                                         |
| Formula weight                                                        | 254.29                                                                                                                   |
| Temperature                                                           | 203(2) K                                                                                                                 |
| Wavelength                                                            | 1.54178 Å                                                                                                                |
| Crystal system, space group                                           | Monoclinic, P21                                                                                                          |
| Unit cell dimensions                                                  | a = 6.70370(10) Å    alpha = 90 deg.<br>b = 10.0938(2) Å, beta = 108.1320(10) deg.<br>c = 9.5452(2) Å    gamma = 90 deg. |
| Volume                                                                | 613.81(2) Å <sup>3</sup>                                                                                                 |
| Z, Calculated density                                                 | 2, 1.376 Mg/m <sup>3</sup>                                                                                               |
| Absorption coefficient                                                | 2.370 mm <sup>-1</sup>                                                                                                   |
| F(000)                                                                | 268                                                                                                                      |
| Crystal size                                                          | 0.20 x 0.20 x 0.20 mm                                                                                                    |
| Theta range for data collection                                       | 4.87 to 68.16 deg.                                                                                                       |
| Limiting indices                                                      | -7 ≤ h ≤ 8, -12 ≤ k ≤ 12, -11 ≤ l ≤ 10                                                                                   |
| Reflections collected / unique                                        | 6686 / 2144 [R(int) = 0.0335]                                                                                            |
| Completeness to theta = 68.16                                         | 98.4 %                                                                                                                   |
| Absorption correction                                                 | Semi-empirical from equivalents                                                                                          |
| Max. and min. transmission                                            | 0.6486 and 0.6486                                                                                                        |
| Refinement method                                                     | Full-matrix least-squares on F <sup>2</sup>                                                                              |
| Data / restraints / parameters                                        | 2144 / 1 / 156                                                                                                           |
| Goodness-of-fit on F <sup>2</sup>                                     | 1.062                                                                                                                    |
| Final R indices [I > 2σ(I)]                                           | R1 = 0.0324, wR2 = 0.0785                                                                                                |
| R indices (all data)                                                  | R1 = 0.0341, wR2 = 0.0796                                                                                                |
| Absolute structure parameter                                          | 0.021(19)                                                                                                                |
| Extinction coefficient                                                | 0.0073(11)                                                                                                               |
| Largest diff. peak and hole                                           | 0.218 and -0.205 e.Å <sup>-3</sup>                                                                                       |

| Table 3. Crystal data and structure refinement for compound <b>3ea</b> |                                                                                                                |
|------------------------------------------------------------------------|----------------------------------------------------------------------------------------------------------------|
| Identification code                                                    | <b>3ea</b>                                                                                                     |
| Empirical formula                                                      | C <sub>12</sub> H <sub>11</sub> Cl <sub>2</sub> F O <sub>4</sub> S                                             |
| Formula weight                                                         | 341.17                                                                                                         |
| Temperature                                                            | 228(2) K                                                                                                       |
| Wavelength                                                             | 1.54178 Å                                                                                                      |
| Crystal system, space group                                            | Orthorhombic, P212121                                                                                          |
| Unit cell dimensions                                                   | a = 7.7539(3) Å    alpha = 90 deg.<br>b = 8.4364(3) Å    beta = 90 deg.<br>c = 22.2865(6) Å    gamma = 90 deg. |
| Volume                                                                 | 1457.87(9) Å <sup>3</sup>                                                                                      |
| Z, Calculated density                                                  | 4, 1.554 Mg/m <sup>3</sup>                                                                                     |
| Absorption coefficient                                                 | 5.556 mm <sup>-1</sup>                                                                                         |
| F(000)                                                                 | 696                                                                                                            |
| Crystal size                                                           | 0.15 x 0.08 x 0.02 mm                                                                                          |
| Theta range for data collection                                        | 3.97 to 68.23 deg.                                                                                             |
| Limiting indices                                                       | -9 ≤ h ≤ 9, -9 ≤ k ≤ 10, -26 ≤ l ≤ 26                                                                          |
| Reflections collected / unique                                         | 17397 / 2634 [R(int) = 0.0770]                                                                                 |
| Completeness to theta = 68.23                                          | 99.0 %                                                                                                         |
| Absorption correction                                                  | Semi-empirical from equivalents                                                                                |
| Max. and min. transmission                                             | 0.8970 and 0.4895                                                                                              |
| Refinement method                                                      | Full-matrix least-squares on F <sup>2</sup>                                                                    |
| Data / restraints / parameters                                         | 2634 / 0 / 183                                                                                                 |
| Goodness-of-fit on F <sup>2</sup>                                      | 1.052                                                                                                          |
| Final R indices [I > 2σ(I)]                                            | R1 = 0.0417, wR2 = 0.0979                                                                                      |
| R indices (all data)                                                   | R1 = 0.0507, wR2 = 0.1036                                                                                      |
| Absolute structure parameter                                           | 0.00(2)                                                                                                        |
| Extinction coefficient                                                 | 0.0018(3)                                                                                                      |
| Largest diff. peak and hole                                            | 0.322 and -0.300 e.Å <sup>-3</sup>                                                                             |

# **Supporting Information**

## **Stereoselective Radical C–H Alkylation with Acceptor/Acceptor-Substituted Diazo Reagents via Co(II)-Based Metalloradical Catalysis**

Xin Cui, Xue Xu, Li-Mei Jin, Lukasz Wojtas, and X. Peter Zhang\*

Department of Chemistry, University of South Florida, Tampa, Florida 33620-5250

# 2-(4-(tert-butyl)phenyl)cyclopropanecarboxamide (L1)

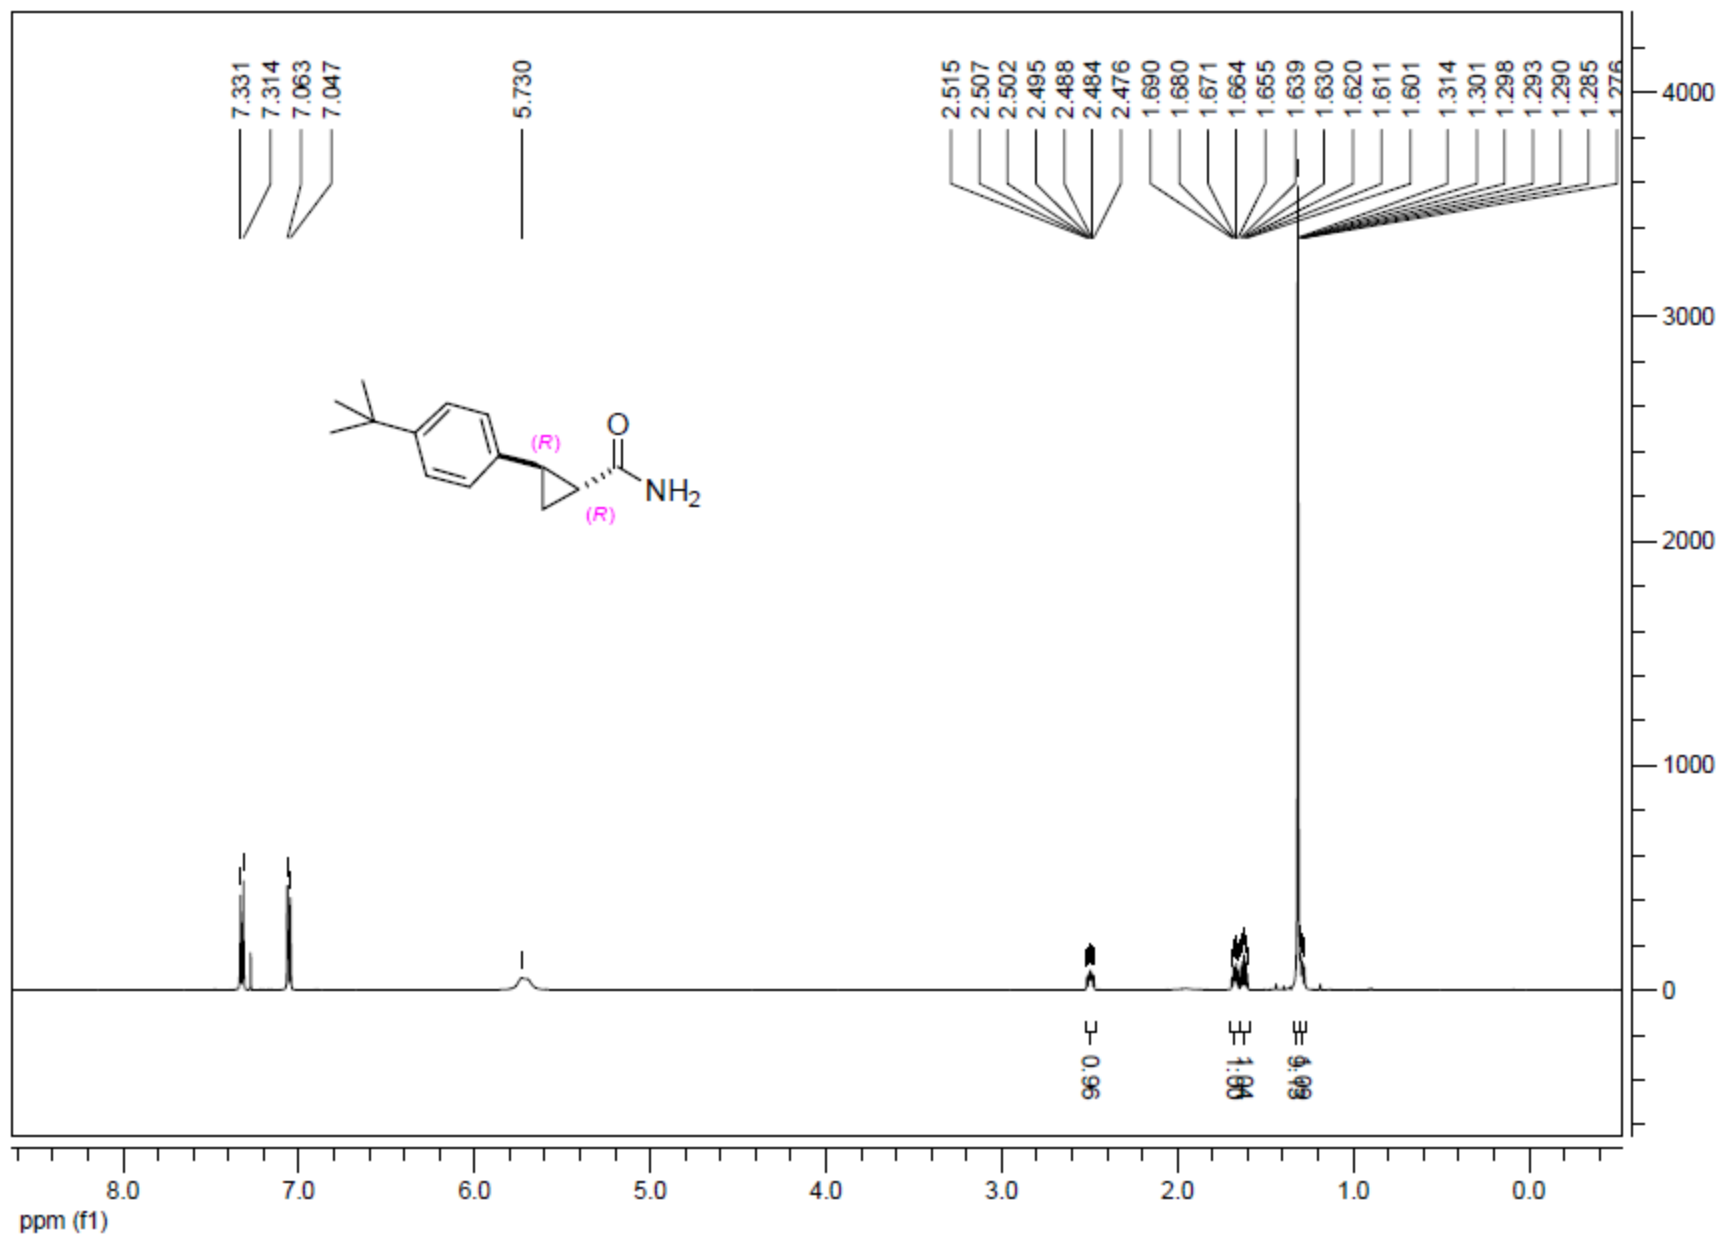

# 2-(4-(tert-butyl)phenyl)cyclopropanecarboxamide (L1)

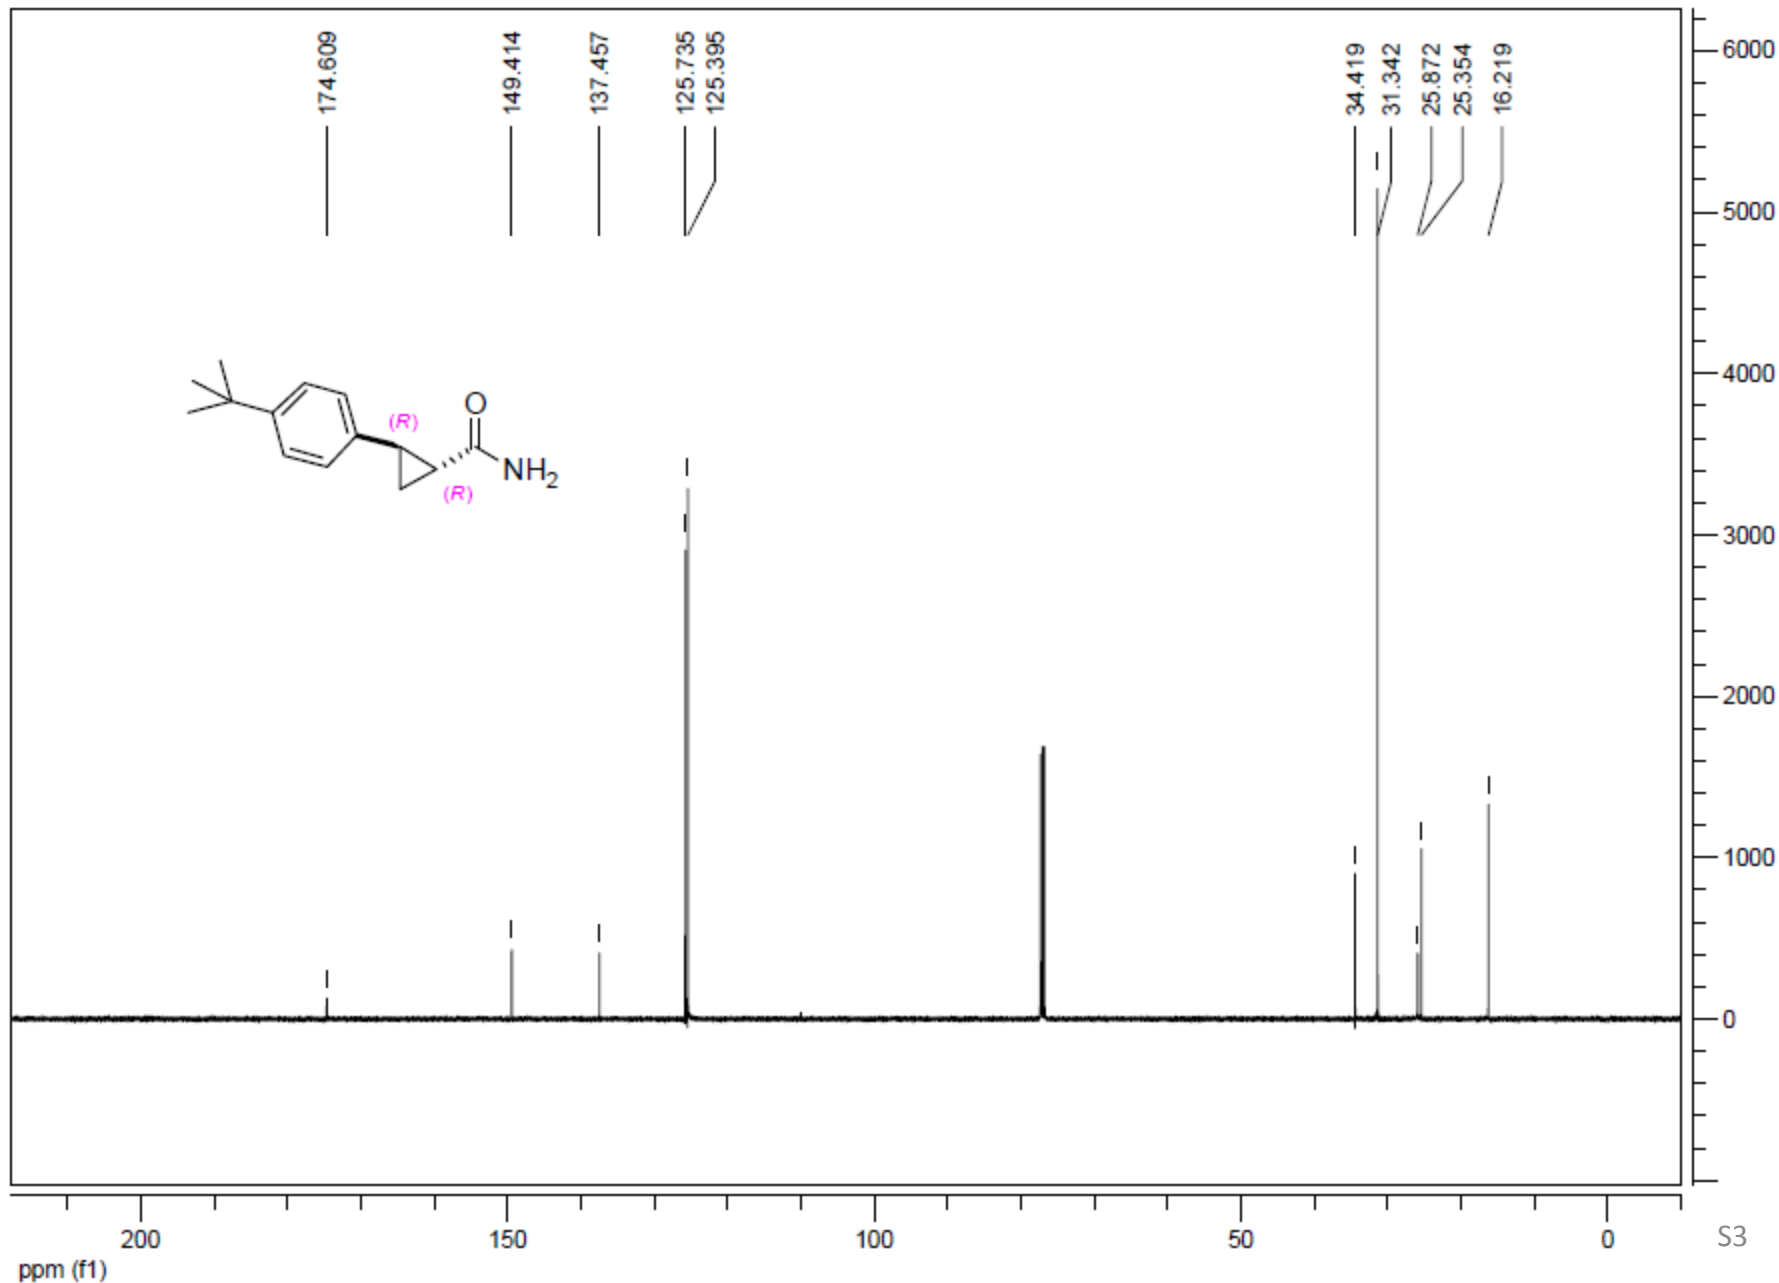



# 2-(4-(tert-butyl)phenyl)cyclopropanecarboxamide (L1)

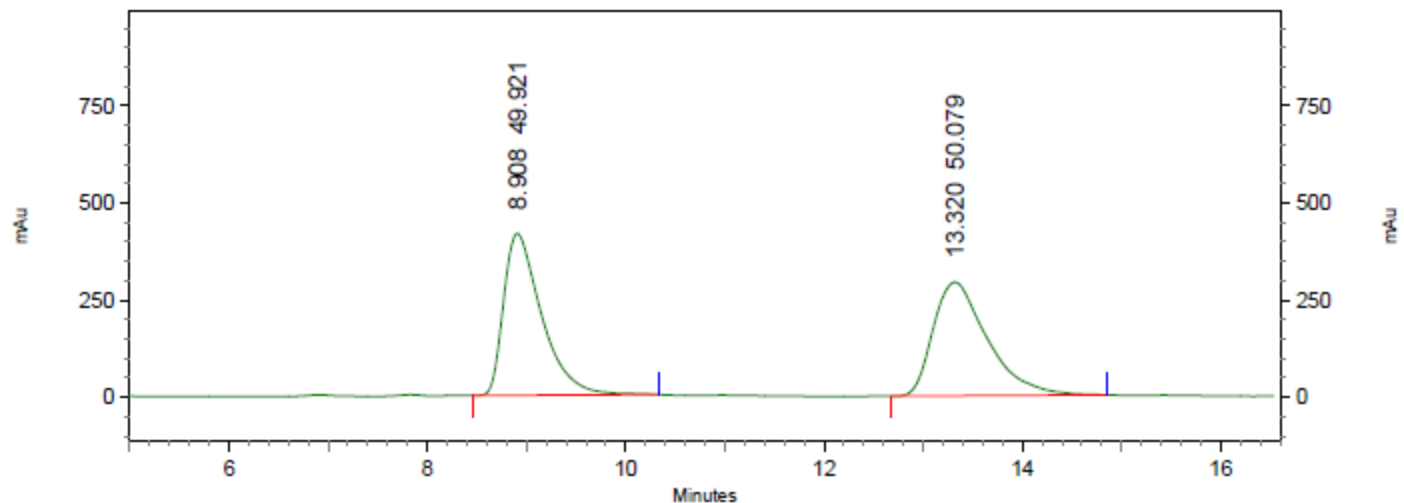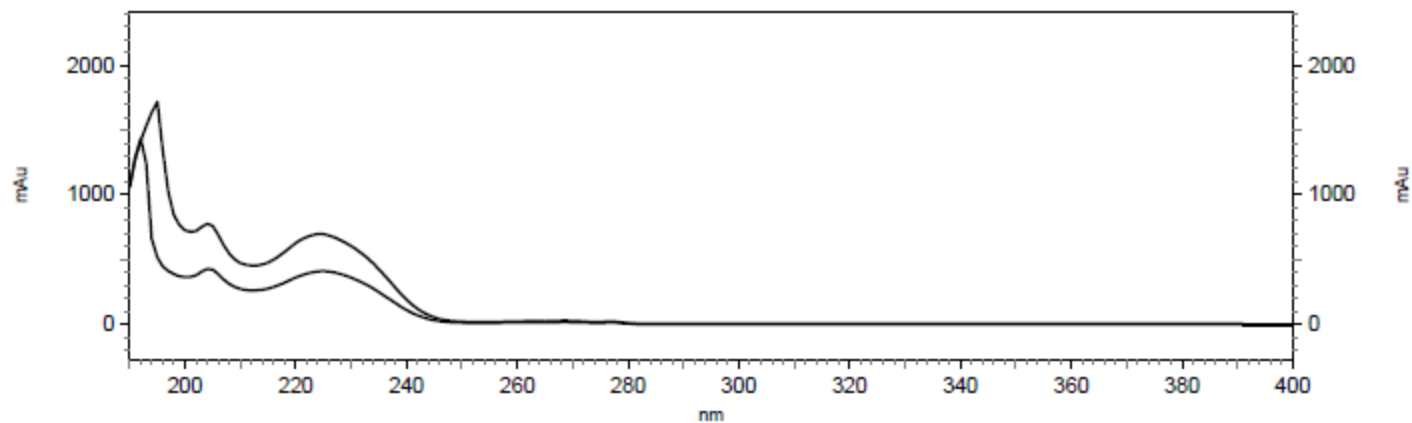

13: 214 nm, 4 nm Results

| Pk #   | Retention Time | Area Percent |
|--------|----------------|--------------|
| 1      | 8.908          | 49.921       |
| 2      | 13.320         | 50.079       |
| Totals |                | 100.000      |

# 2-(4-(tert-butyl)phenyl)cyclopropanecarboxamide (L1)

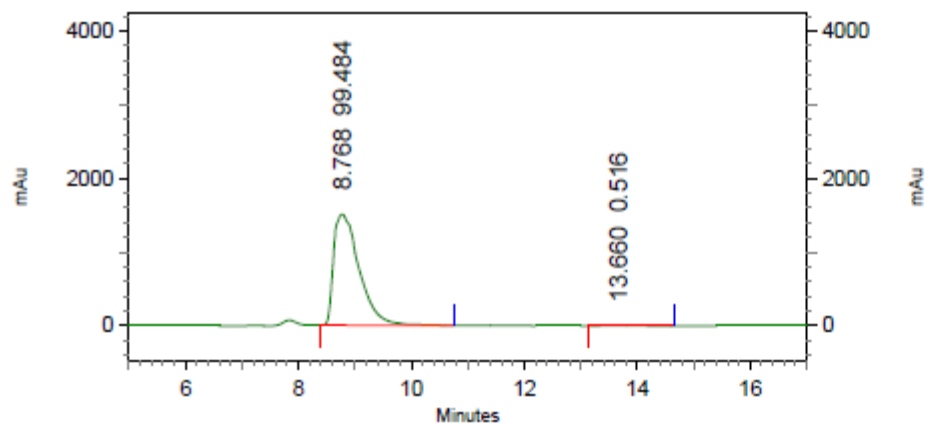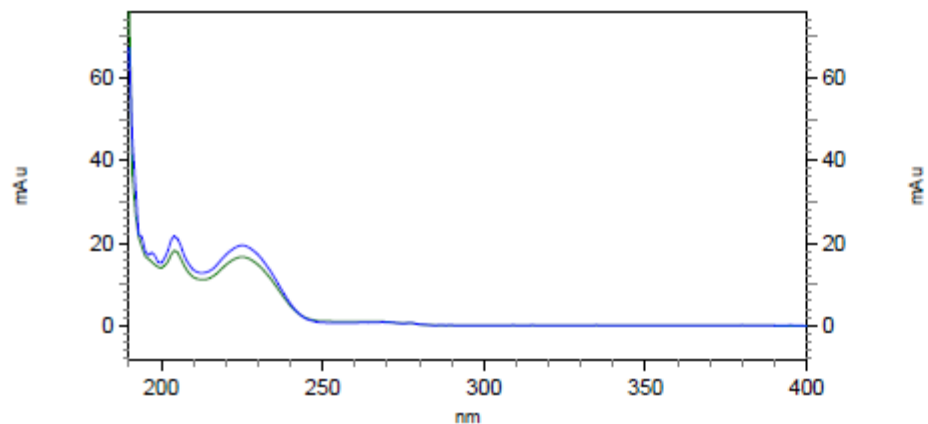

4: 223 nm, 4 nm

Results

| Name | Retention Time | Area Percent | Pk # |
|------|----------------|--------------|------|
|      | 8.768          | 99.484       | 1    |
|      | 13.660         | 0.516        | 2    |

|        |  |         |  |
|--------|--|---------|--|
| Totals |  | 100.000 |  |
|--------|--|---------|--|

# [H<sub>2</sub>(P2)] 3,5-Di<sup>t</sup>Bu-(4'-<sup>t</sup>Bu)XuPhyrin

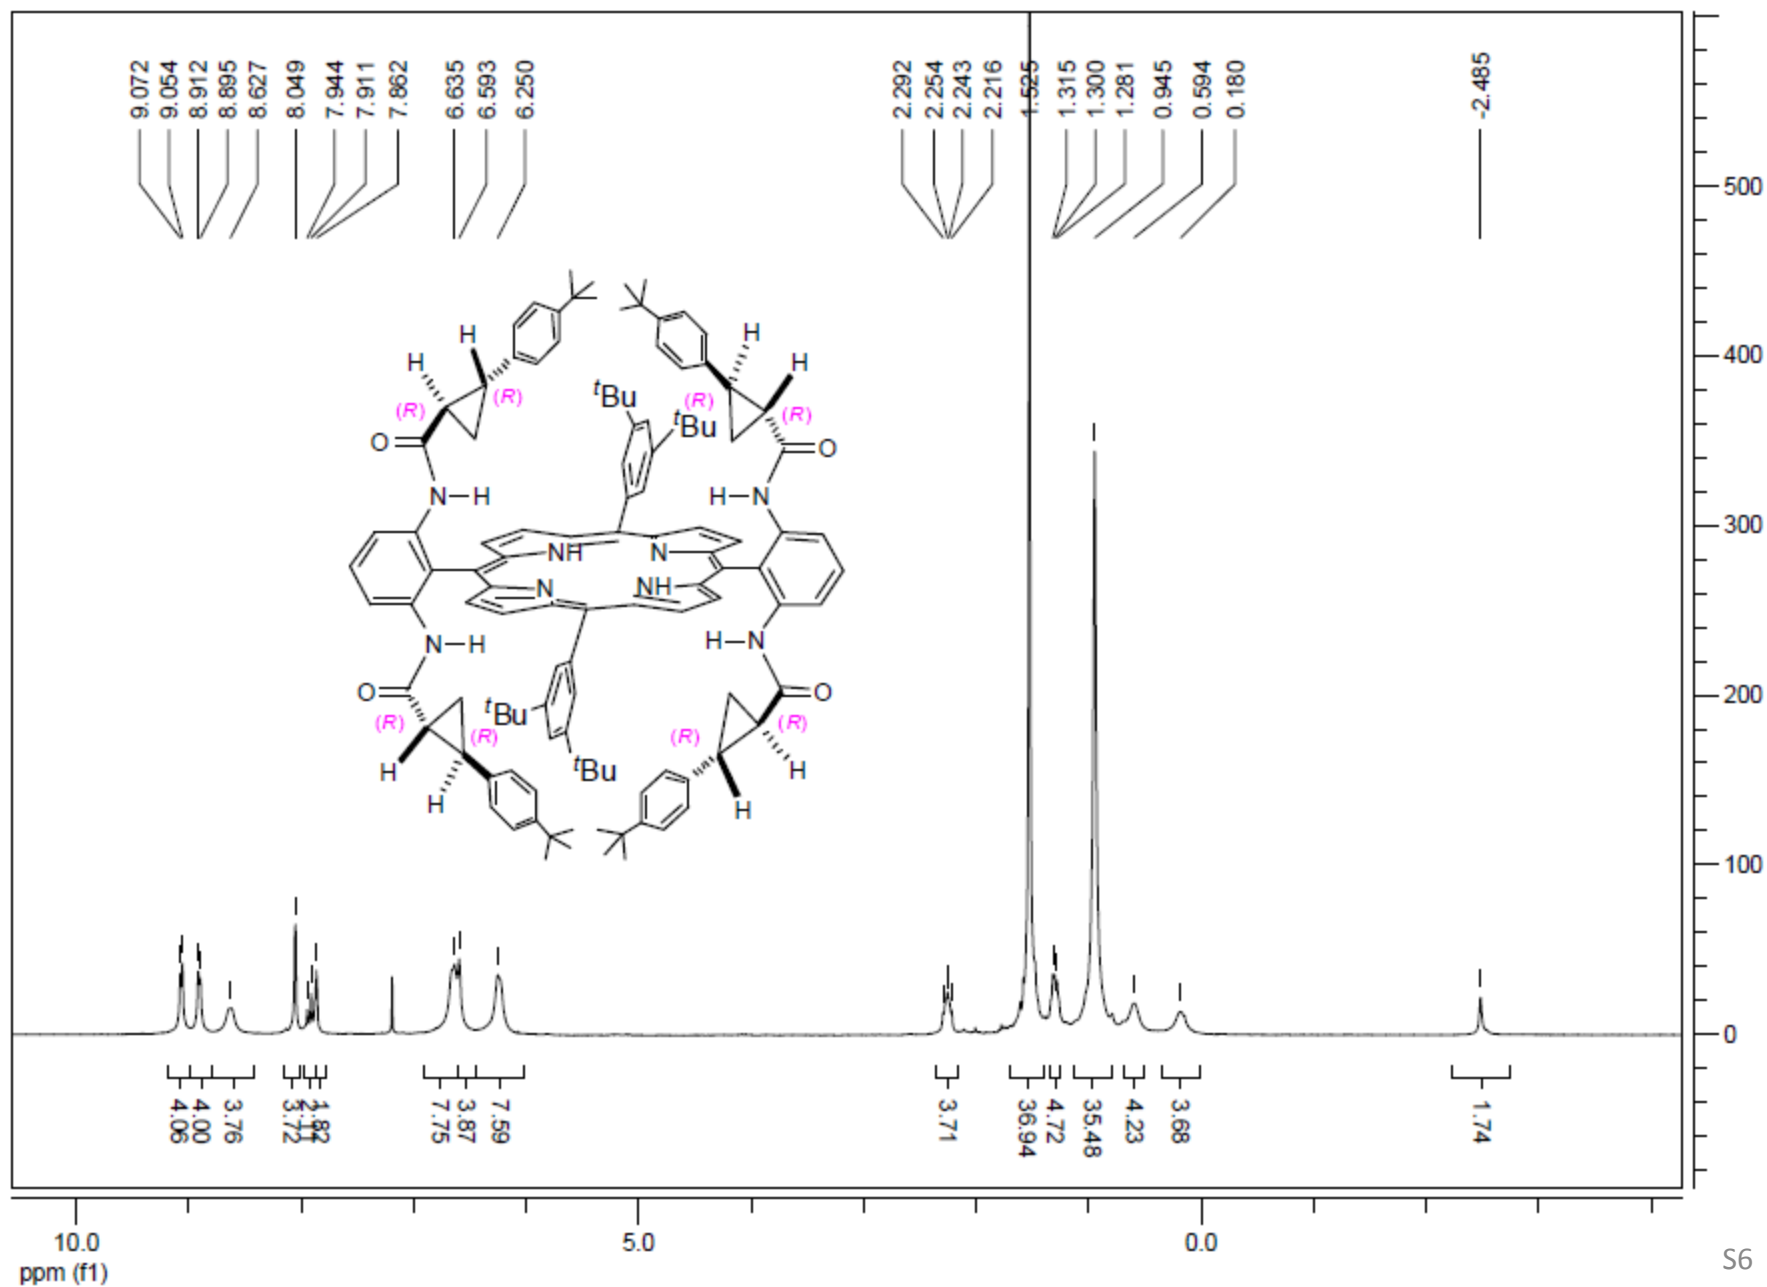

# [H<sub>2</sub>(P2)] 3,5-Di<sup>t</sup>Bu-(4'-<sup>t</sup>Bu)XuPhyrin

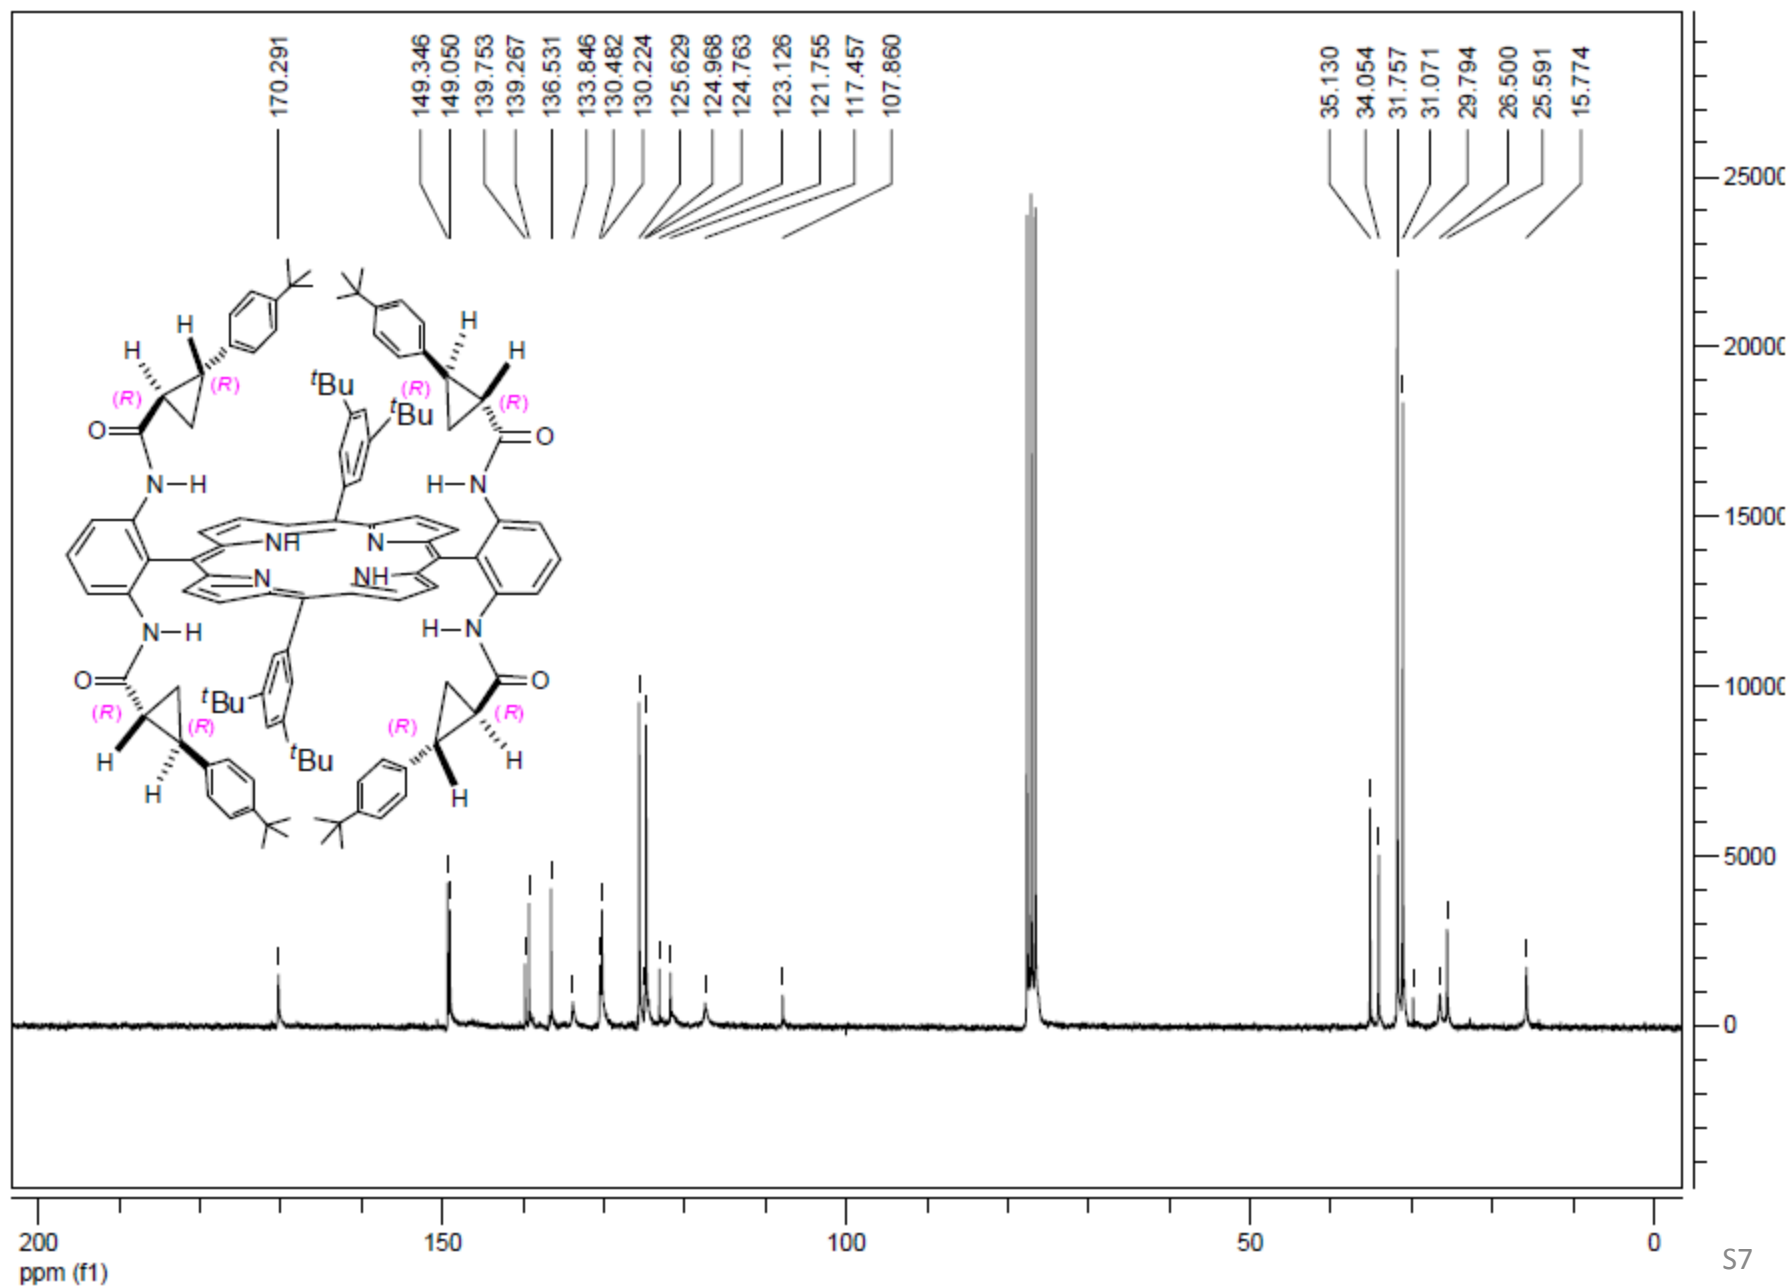

# 5,15-Bis(2,6-dibromophenyl)-10,20-bis(3,5-diisopropylphenyl)porphyrin

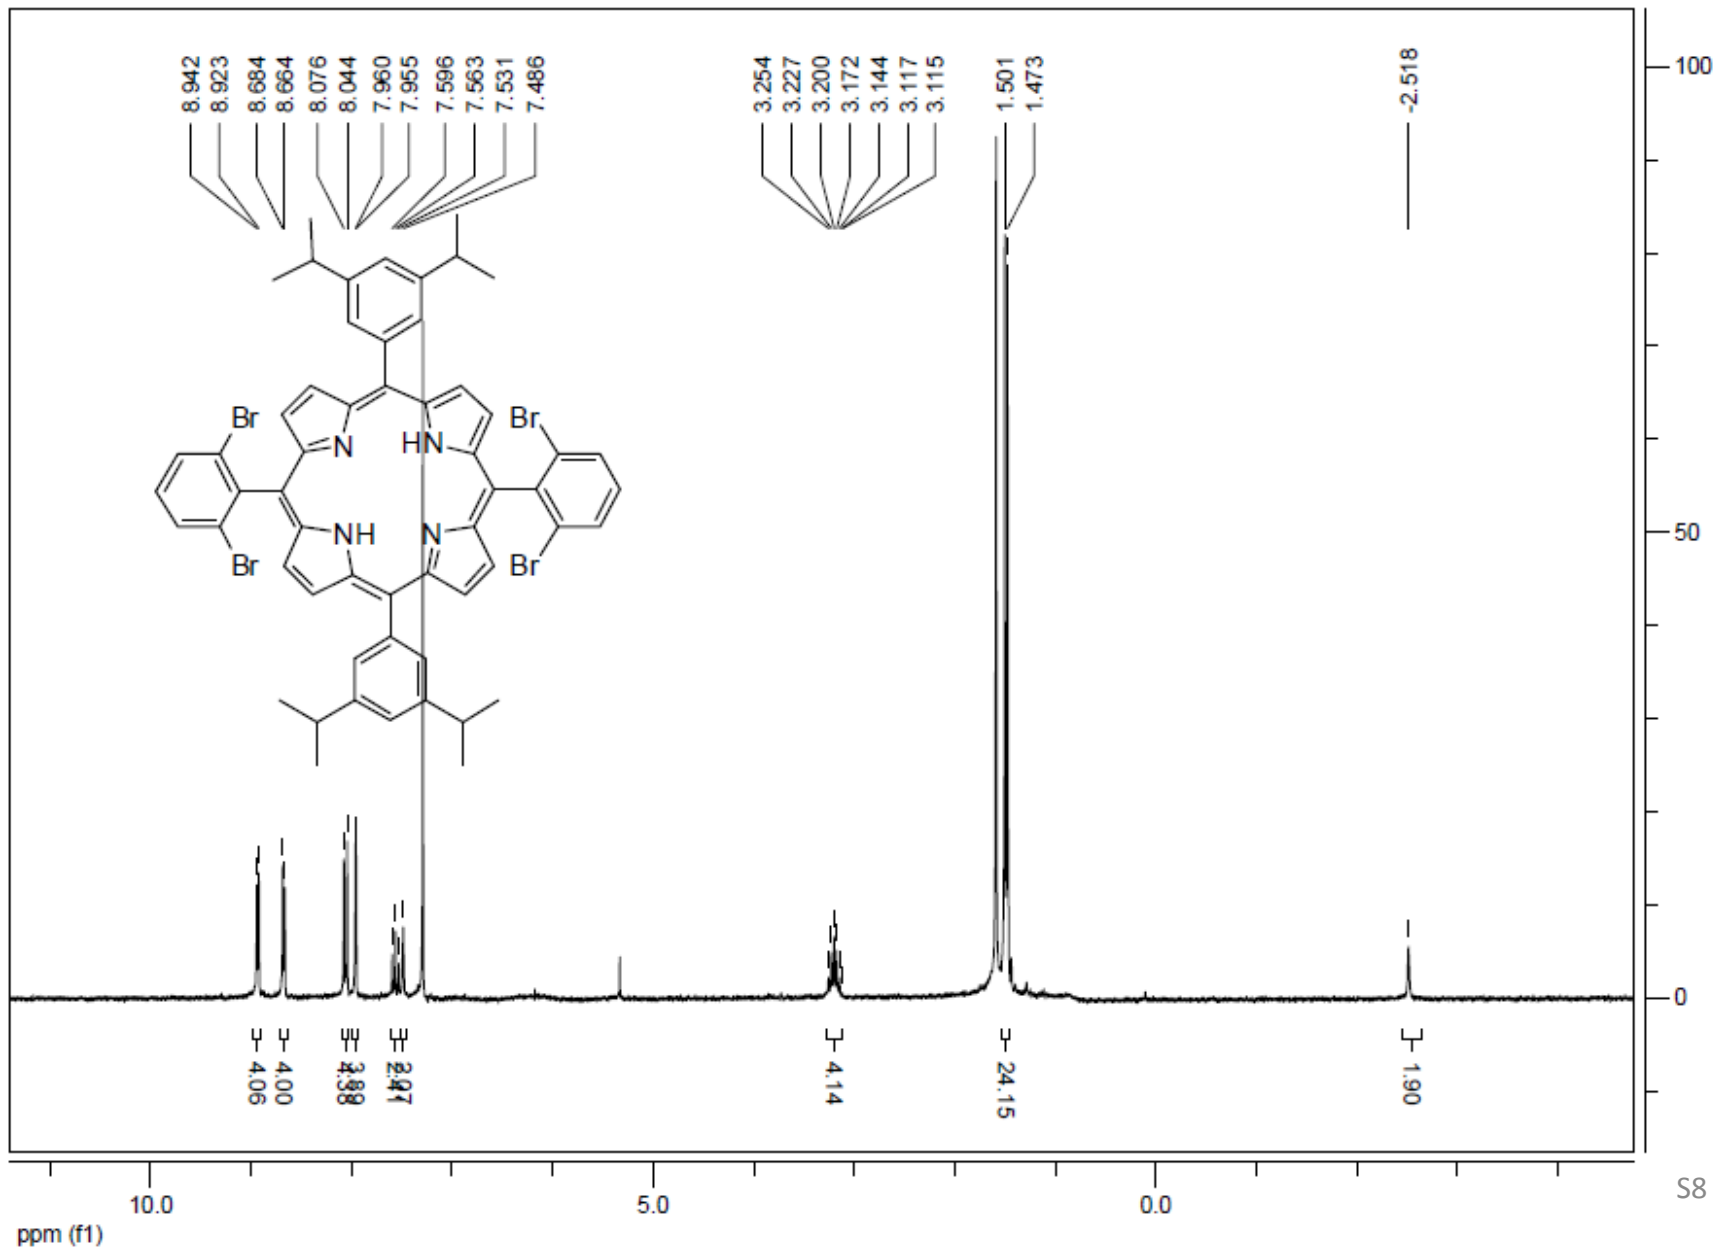

# 5,15-Bis(2,6-dibromophenyl)-10,20-bis(3,5-diisopropylphenyl)porphyrin

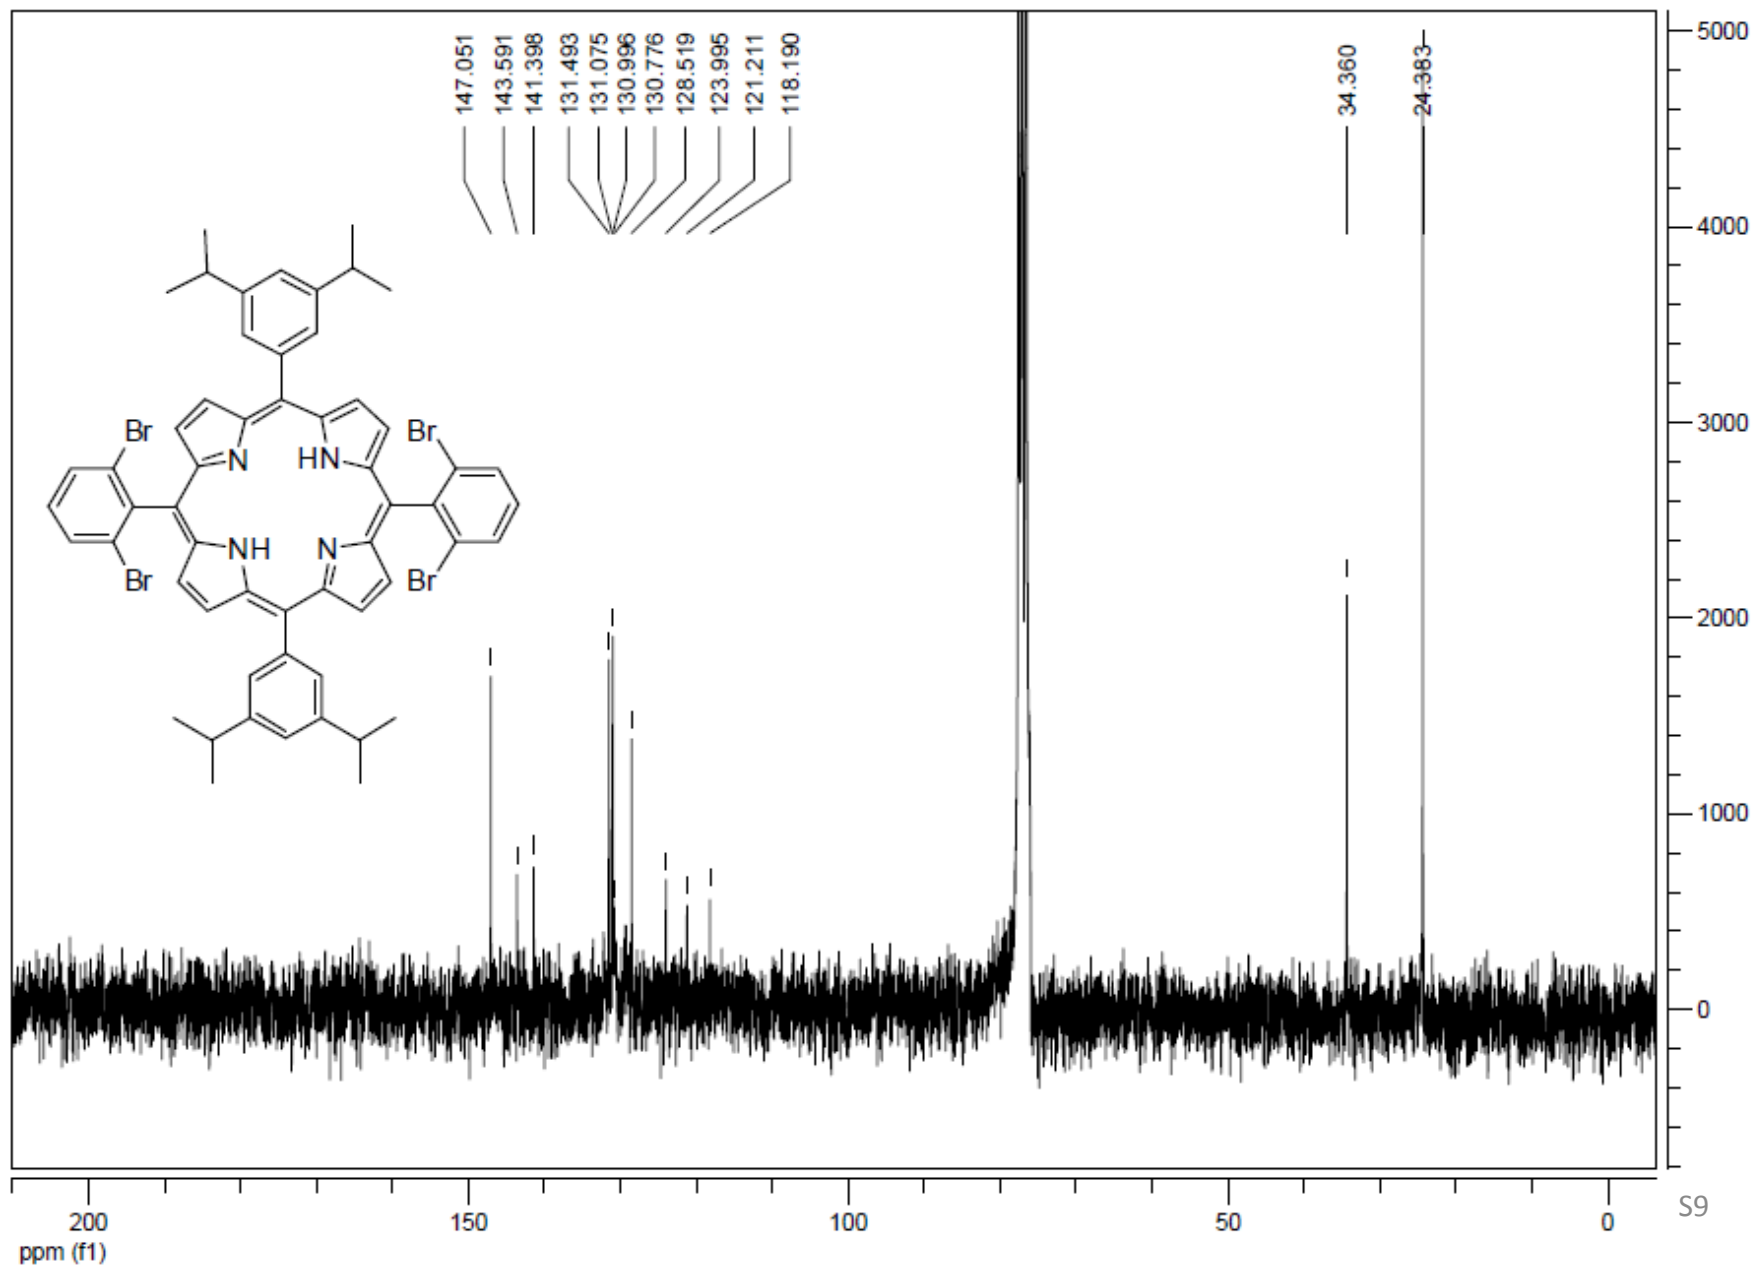

# [H<sub>2</sub>(P3)] 3,5-Di*i*Pr-(4'-*t*Bu)XuPhyrin

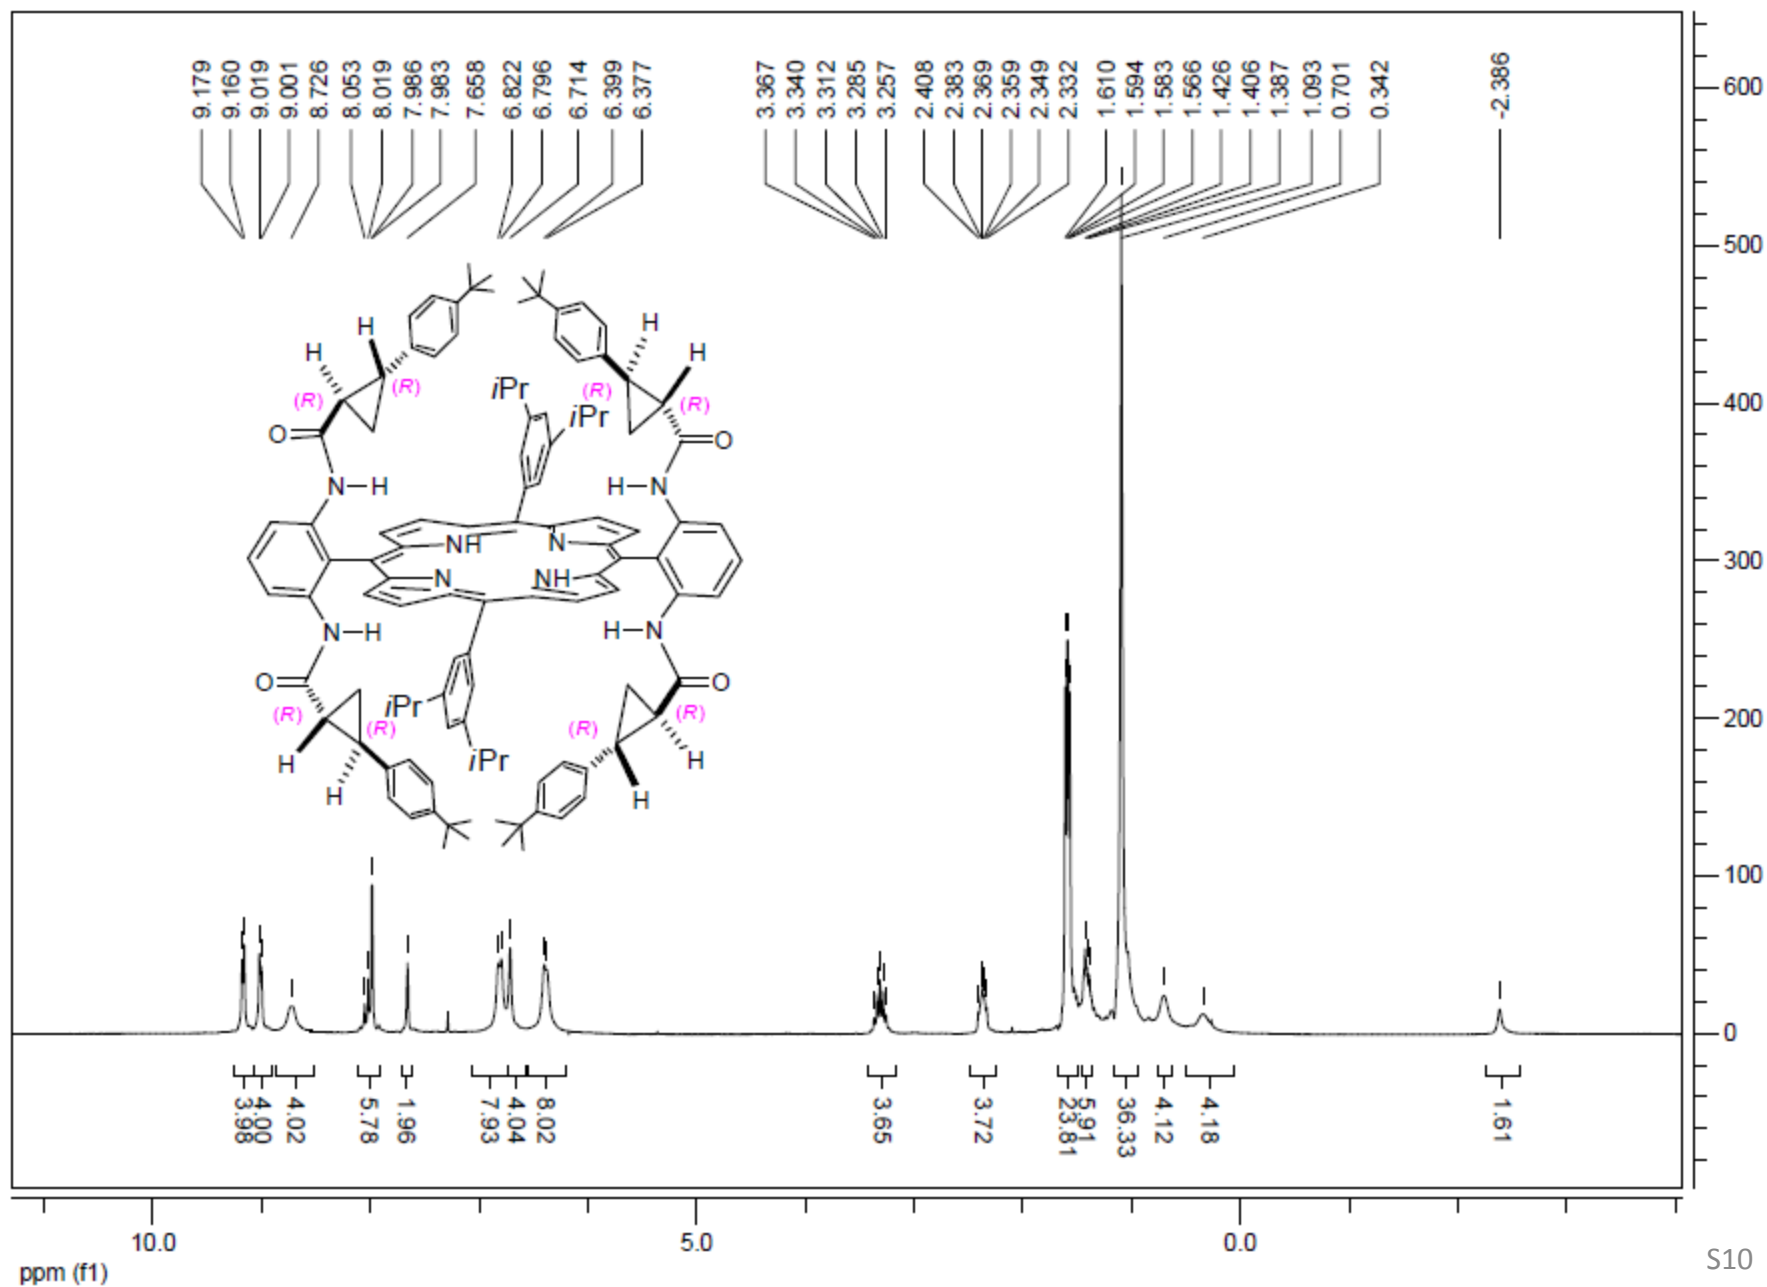

# [H<sub>2</sub>(P3)] 3,5-Di*i*Pr-(4'-*t*Bu)XuPhyrin

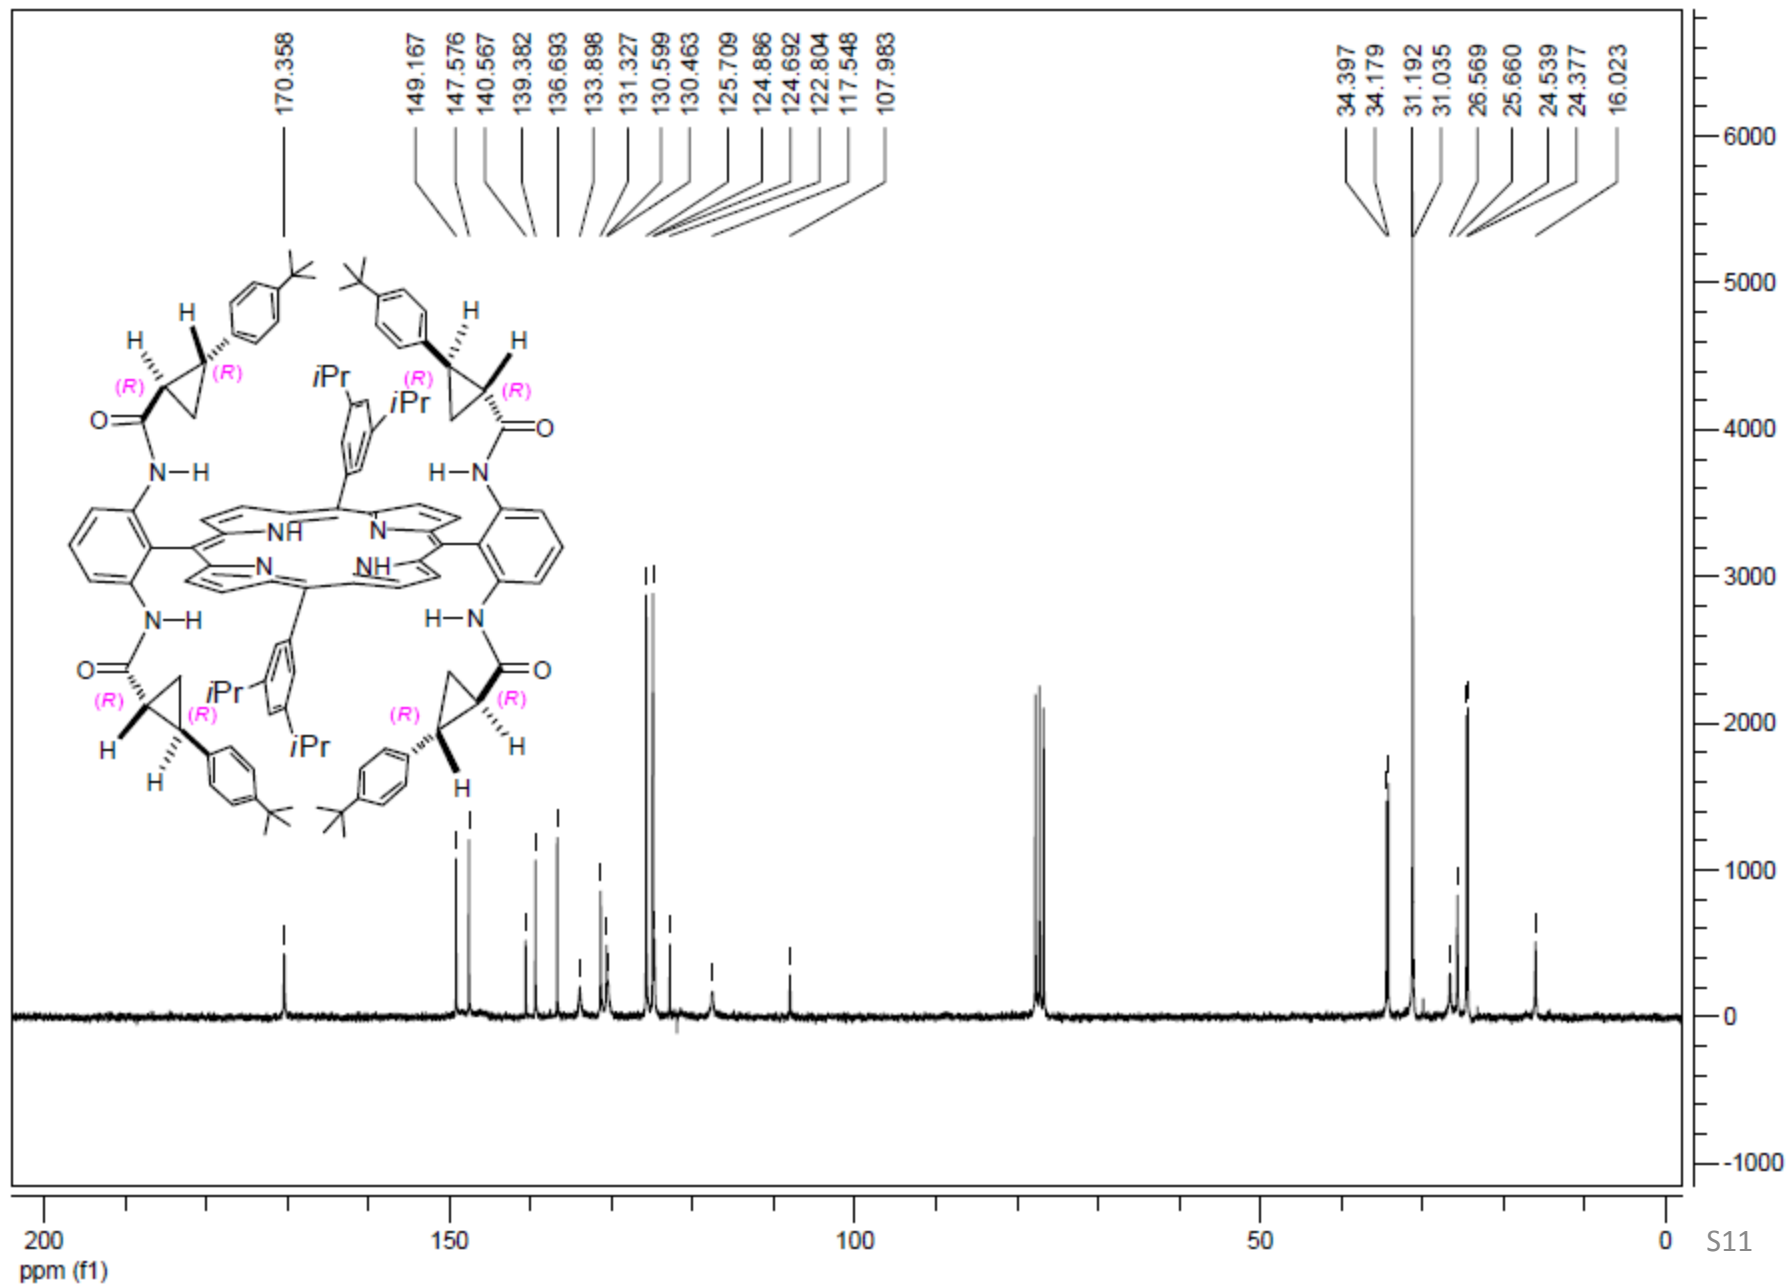



# methyl 2-diazo-2-((3-(4-nitrophenyl)propyl)sulfonyl)acetate (**1a**)

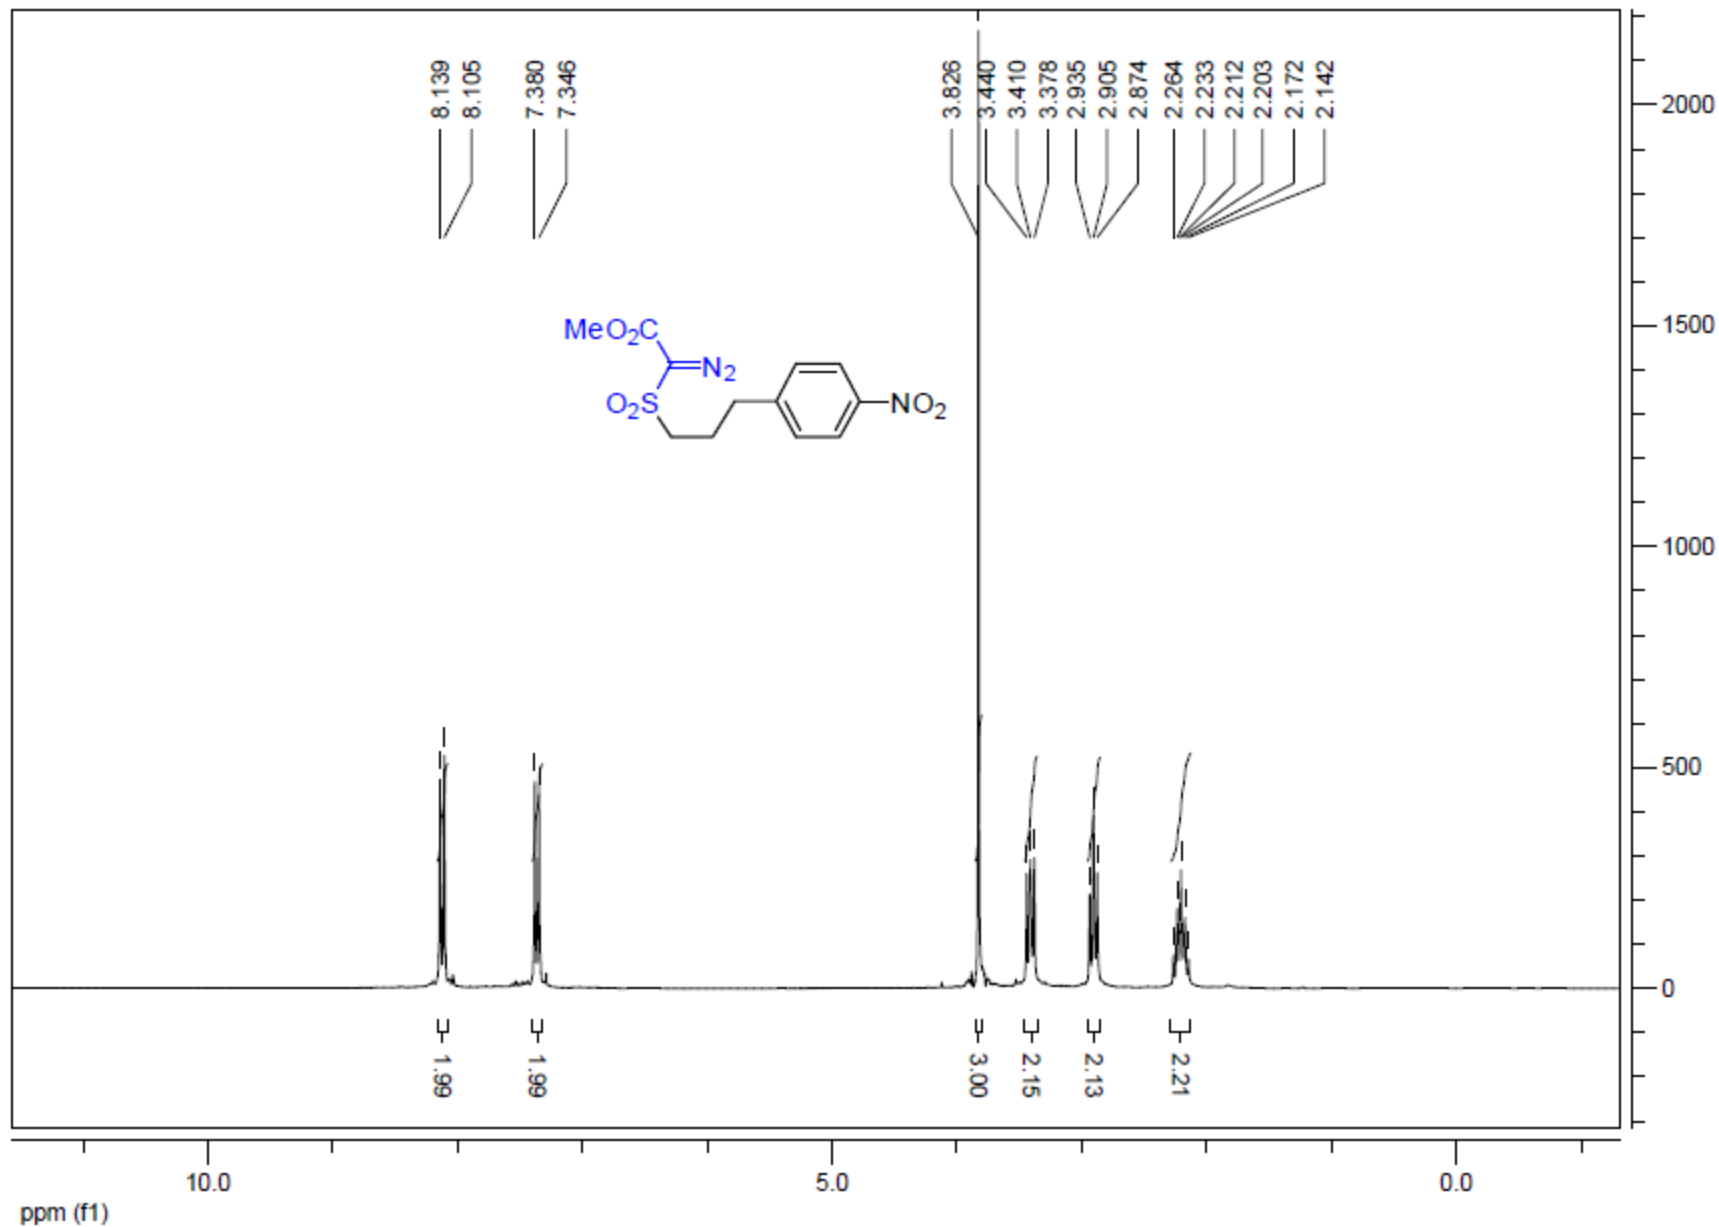

methyl 2-diazo-2-((3-(4-nitrophenyl)propyl)sulfonyl)acetate (**1a**)

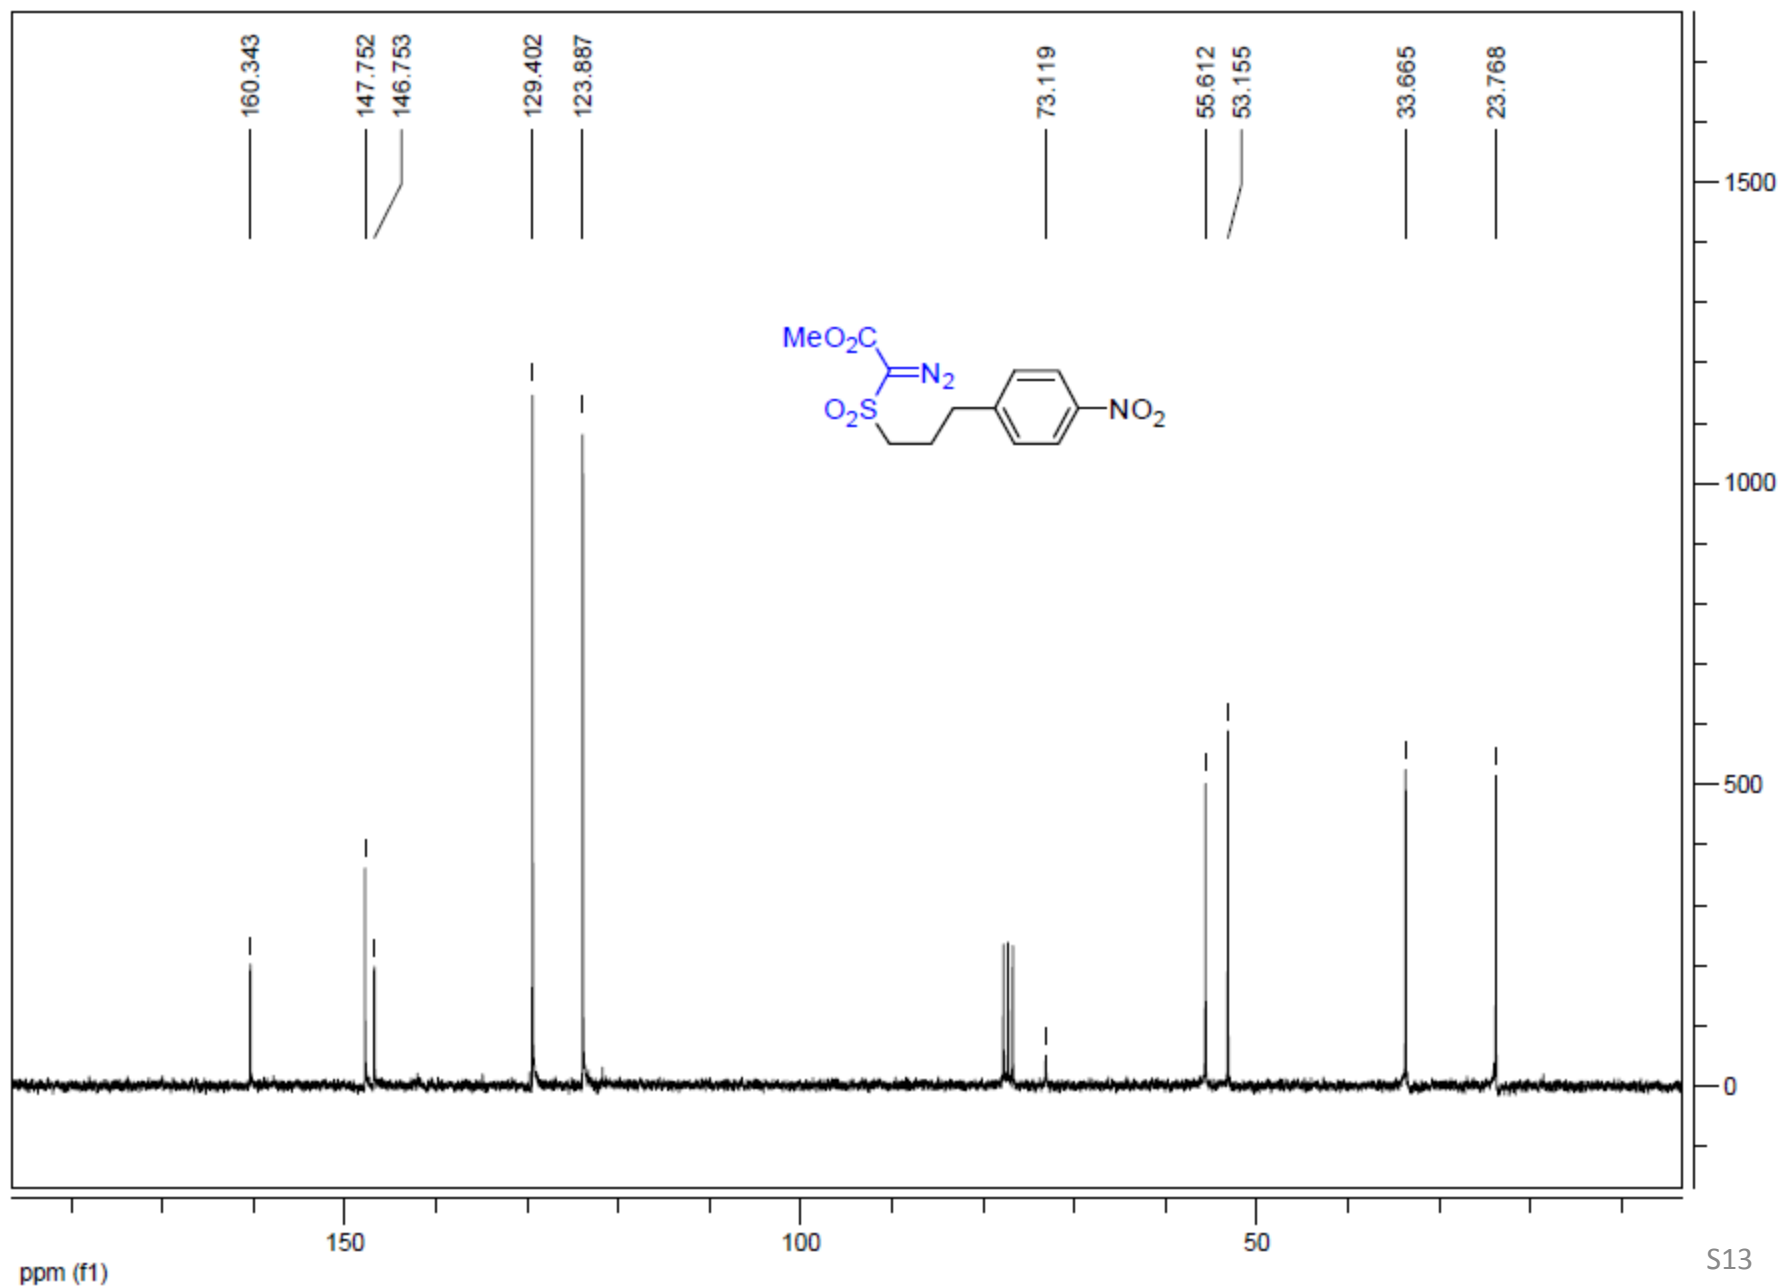

methyl 2-diazo-2-((3-(4-(trifluoromethyl)phenyl)propyl)sulfonyl)acetate (**1b**)

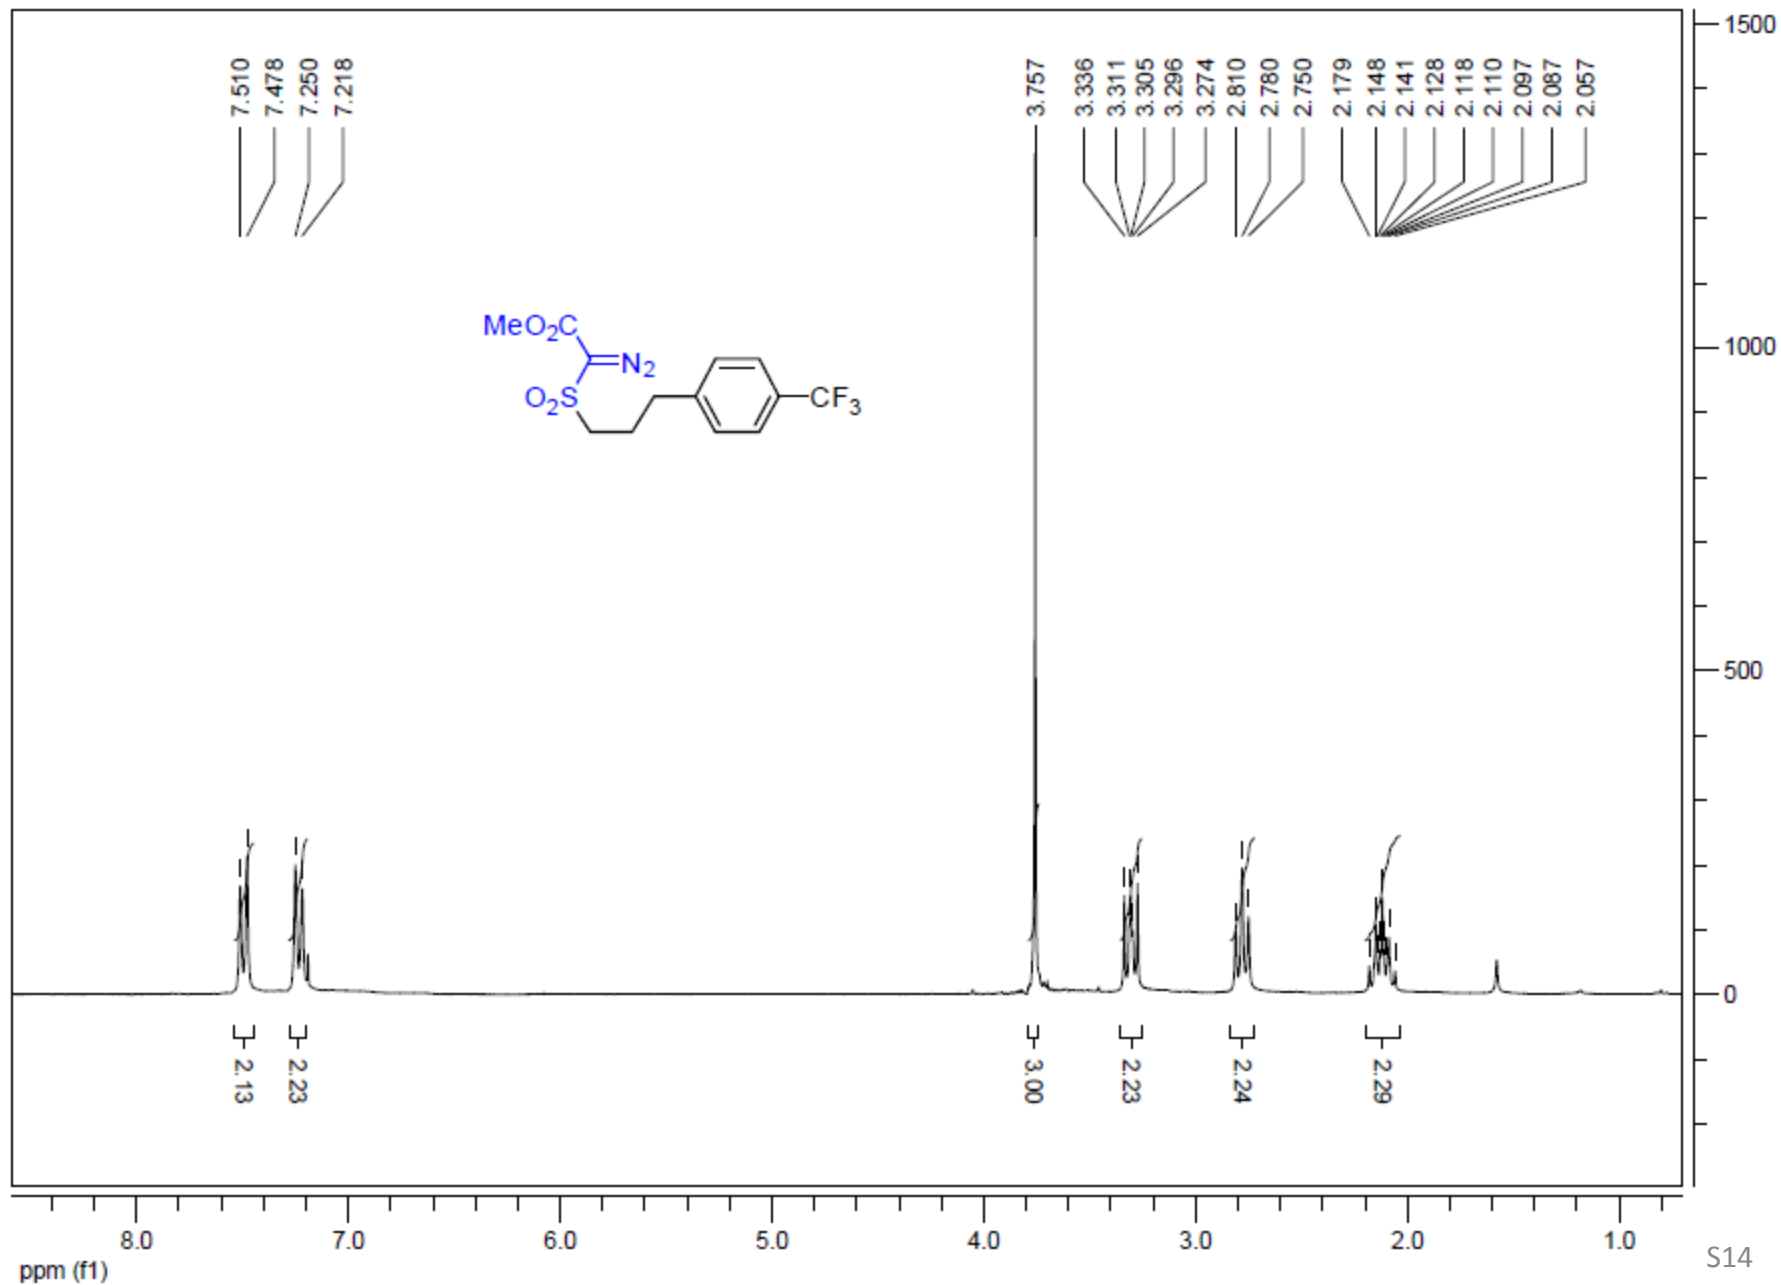

methyl 2-diazo-2-((3-(4-(trifluoromethyl)phenyl)propyl)sulfonyl)acetate (**1b**)

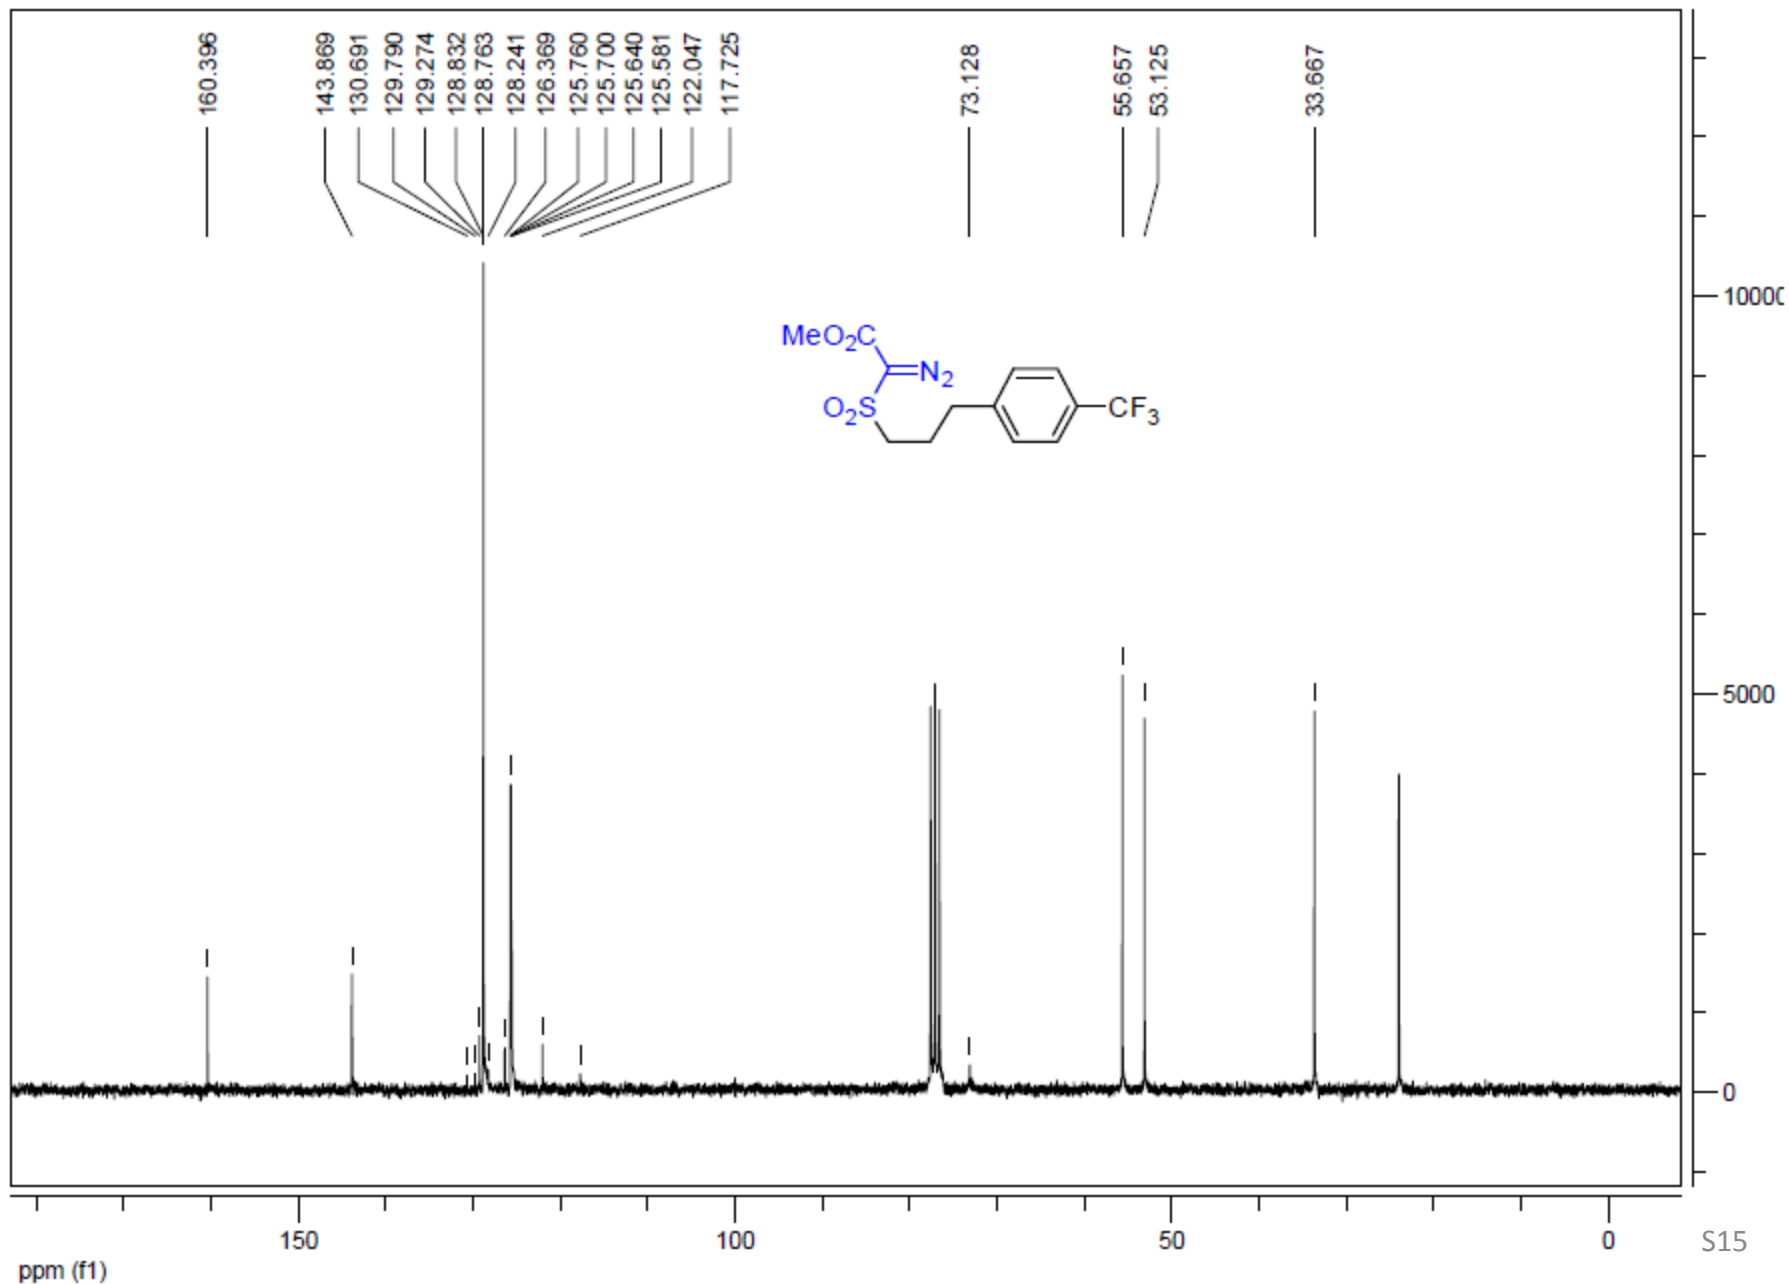

methyl 2-diazo-2-((3-(4-fluorophenyl)propyl)sulfonyl)acetate (**1c**)

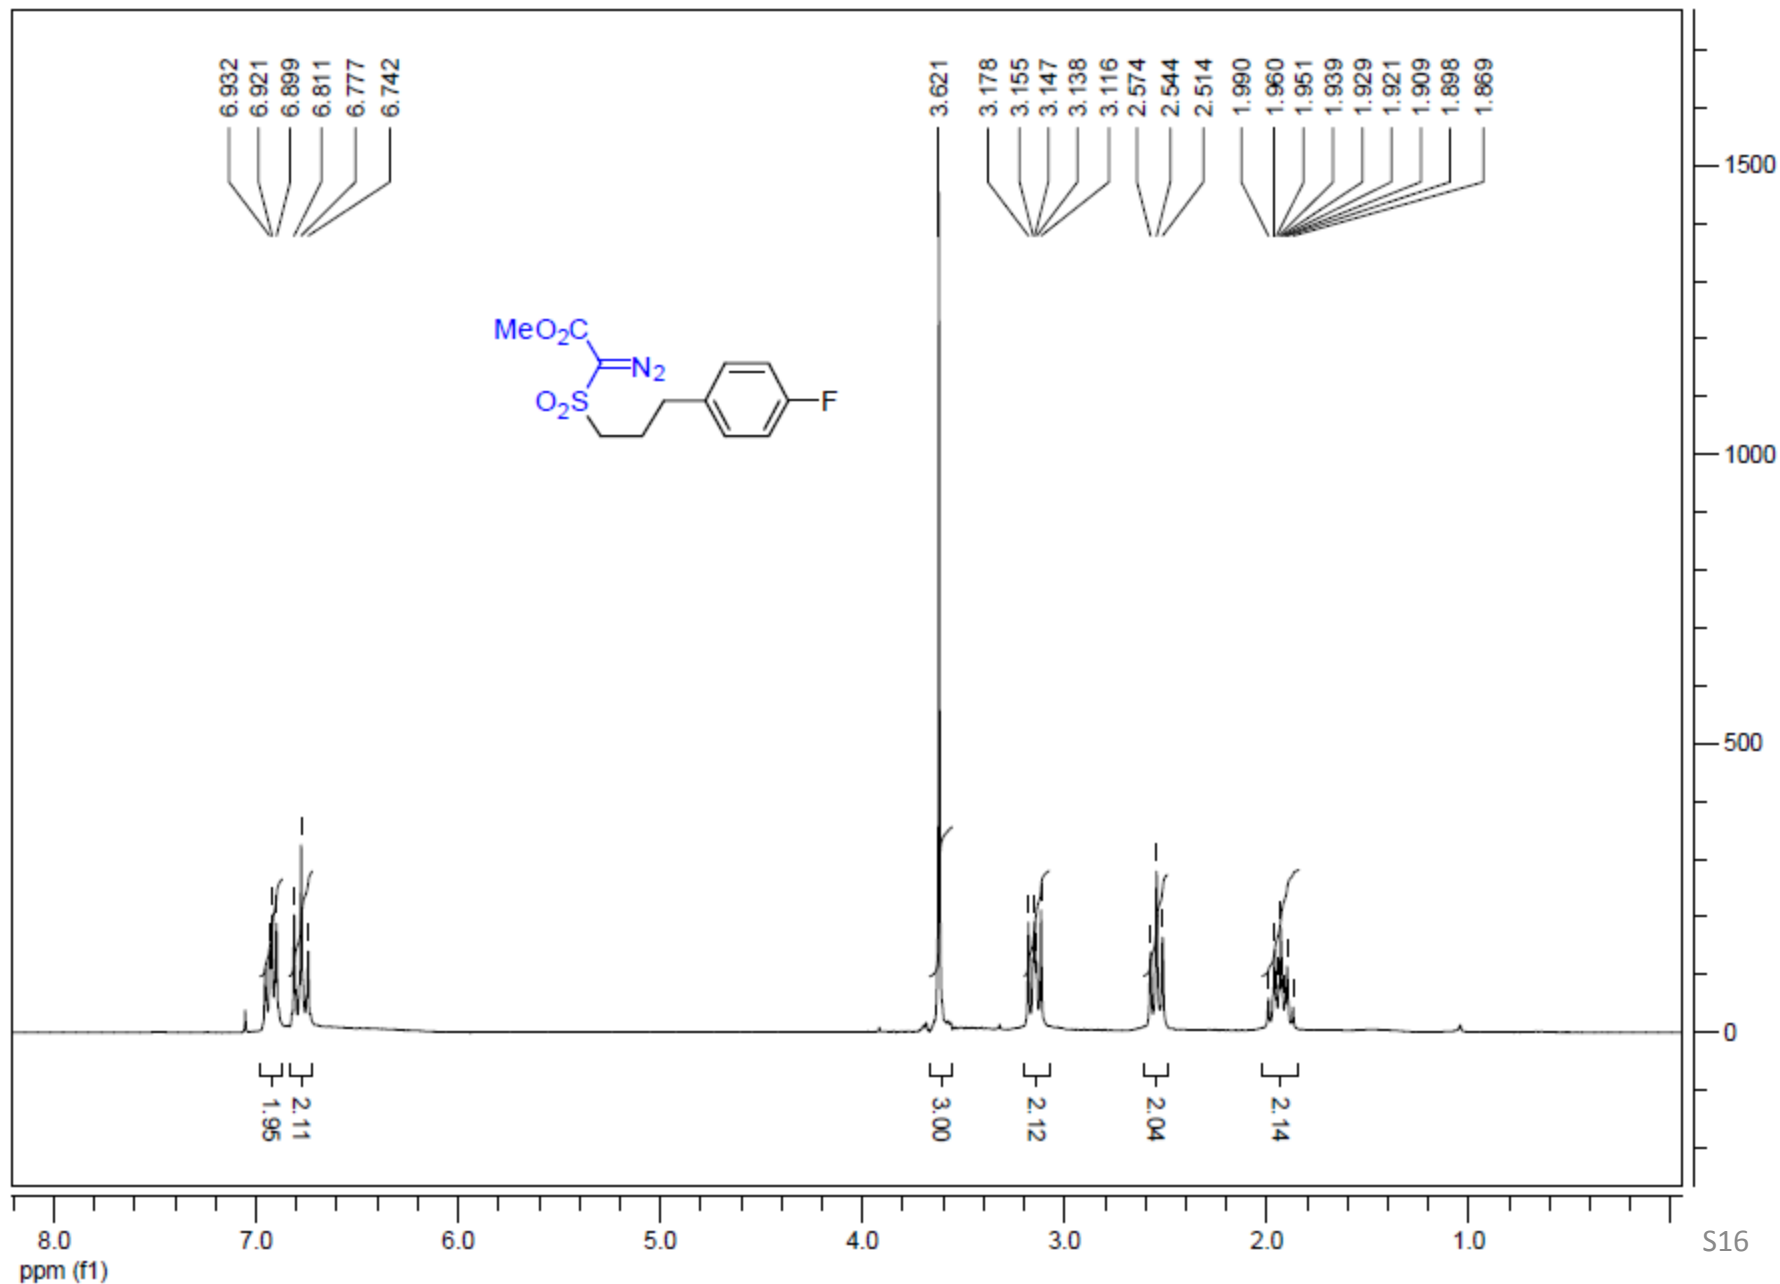

# methyl 2-diazo-2-((3-(4-fluorophenyl)propyl)sulfonyl)acetate (**1c**)

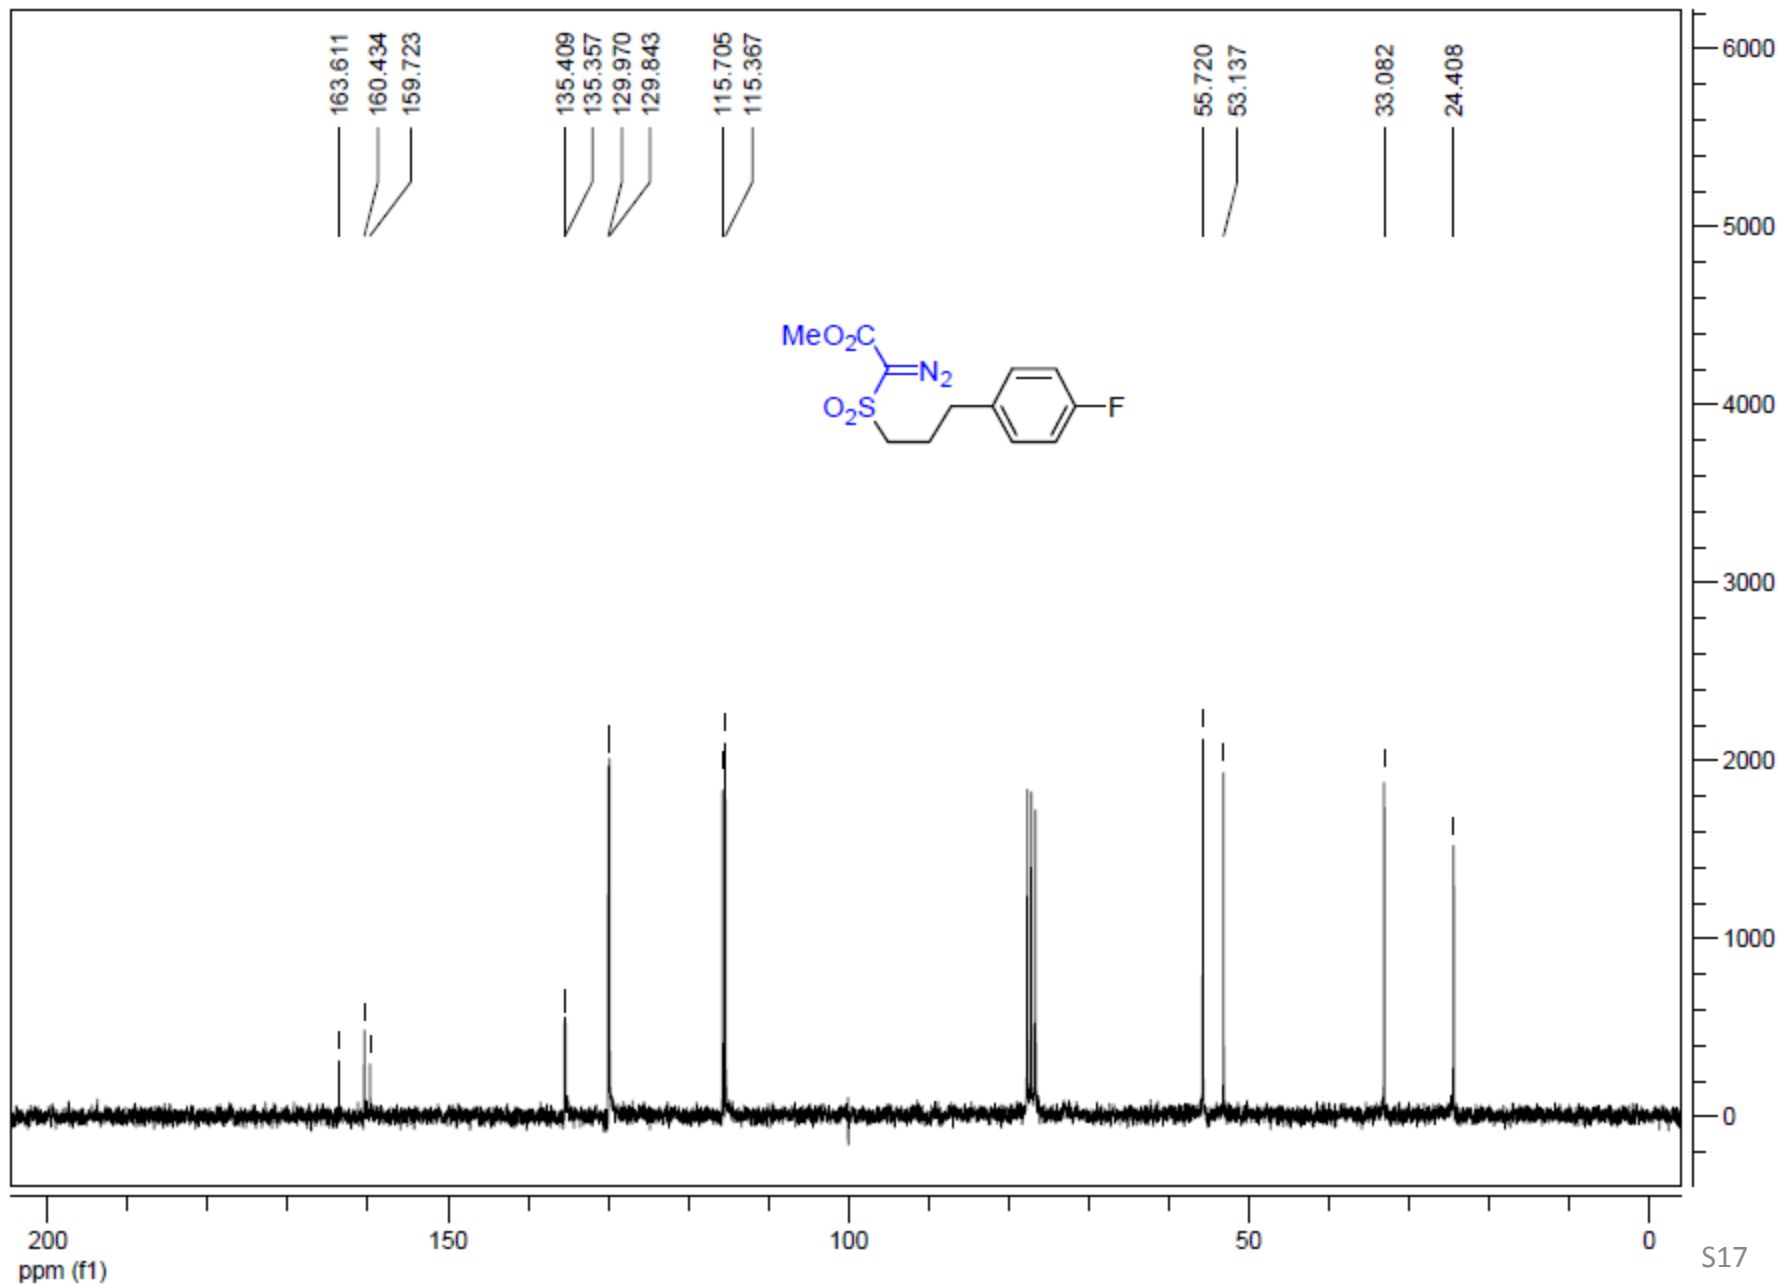

methyl 2-((3-(4-chlorophenyl)propyl)sulfonyl)-2-diazoacetate (**1d**)

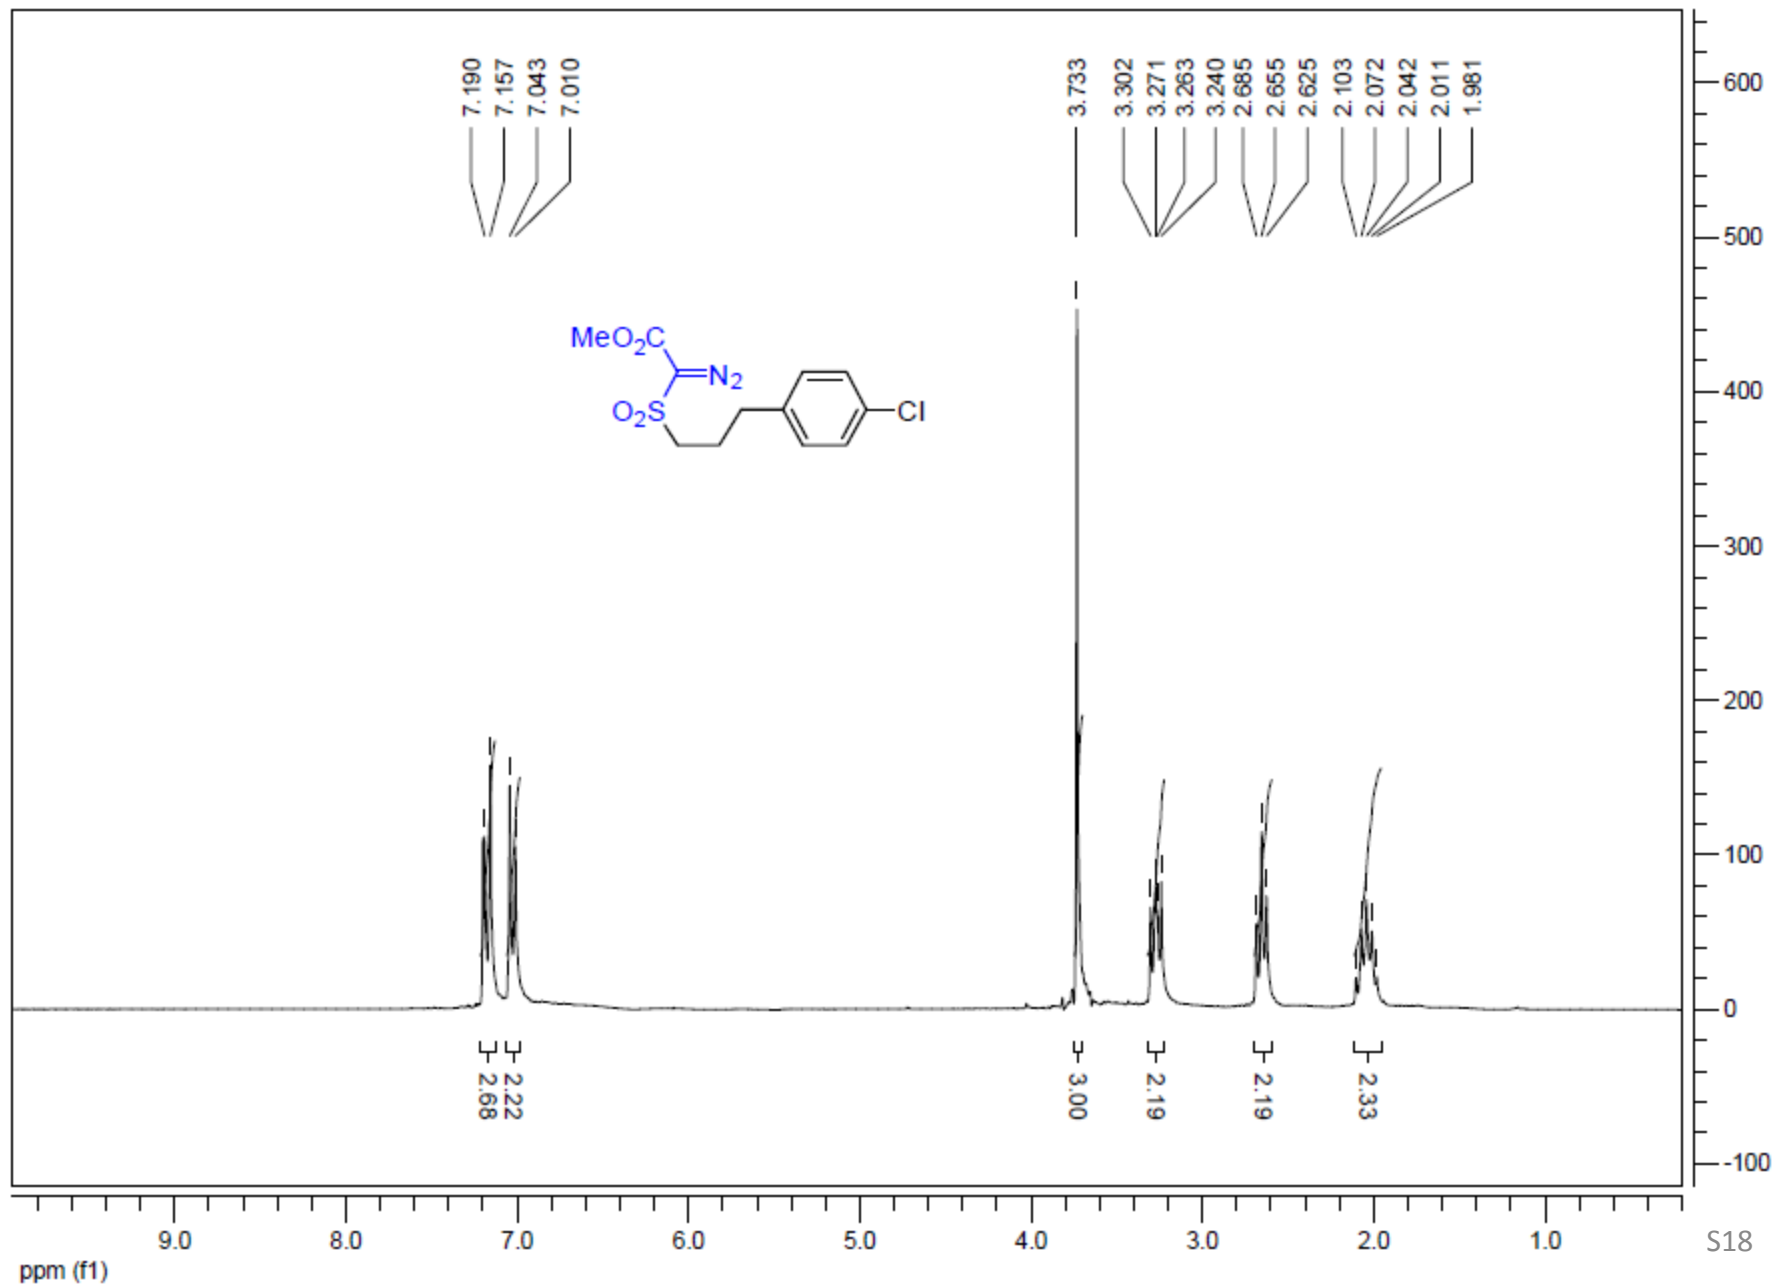

# methyl 2-((3-(4-chlorophenyl)propyl)sulfonyl)-2-diazoacetate (**1d**)

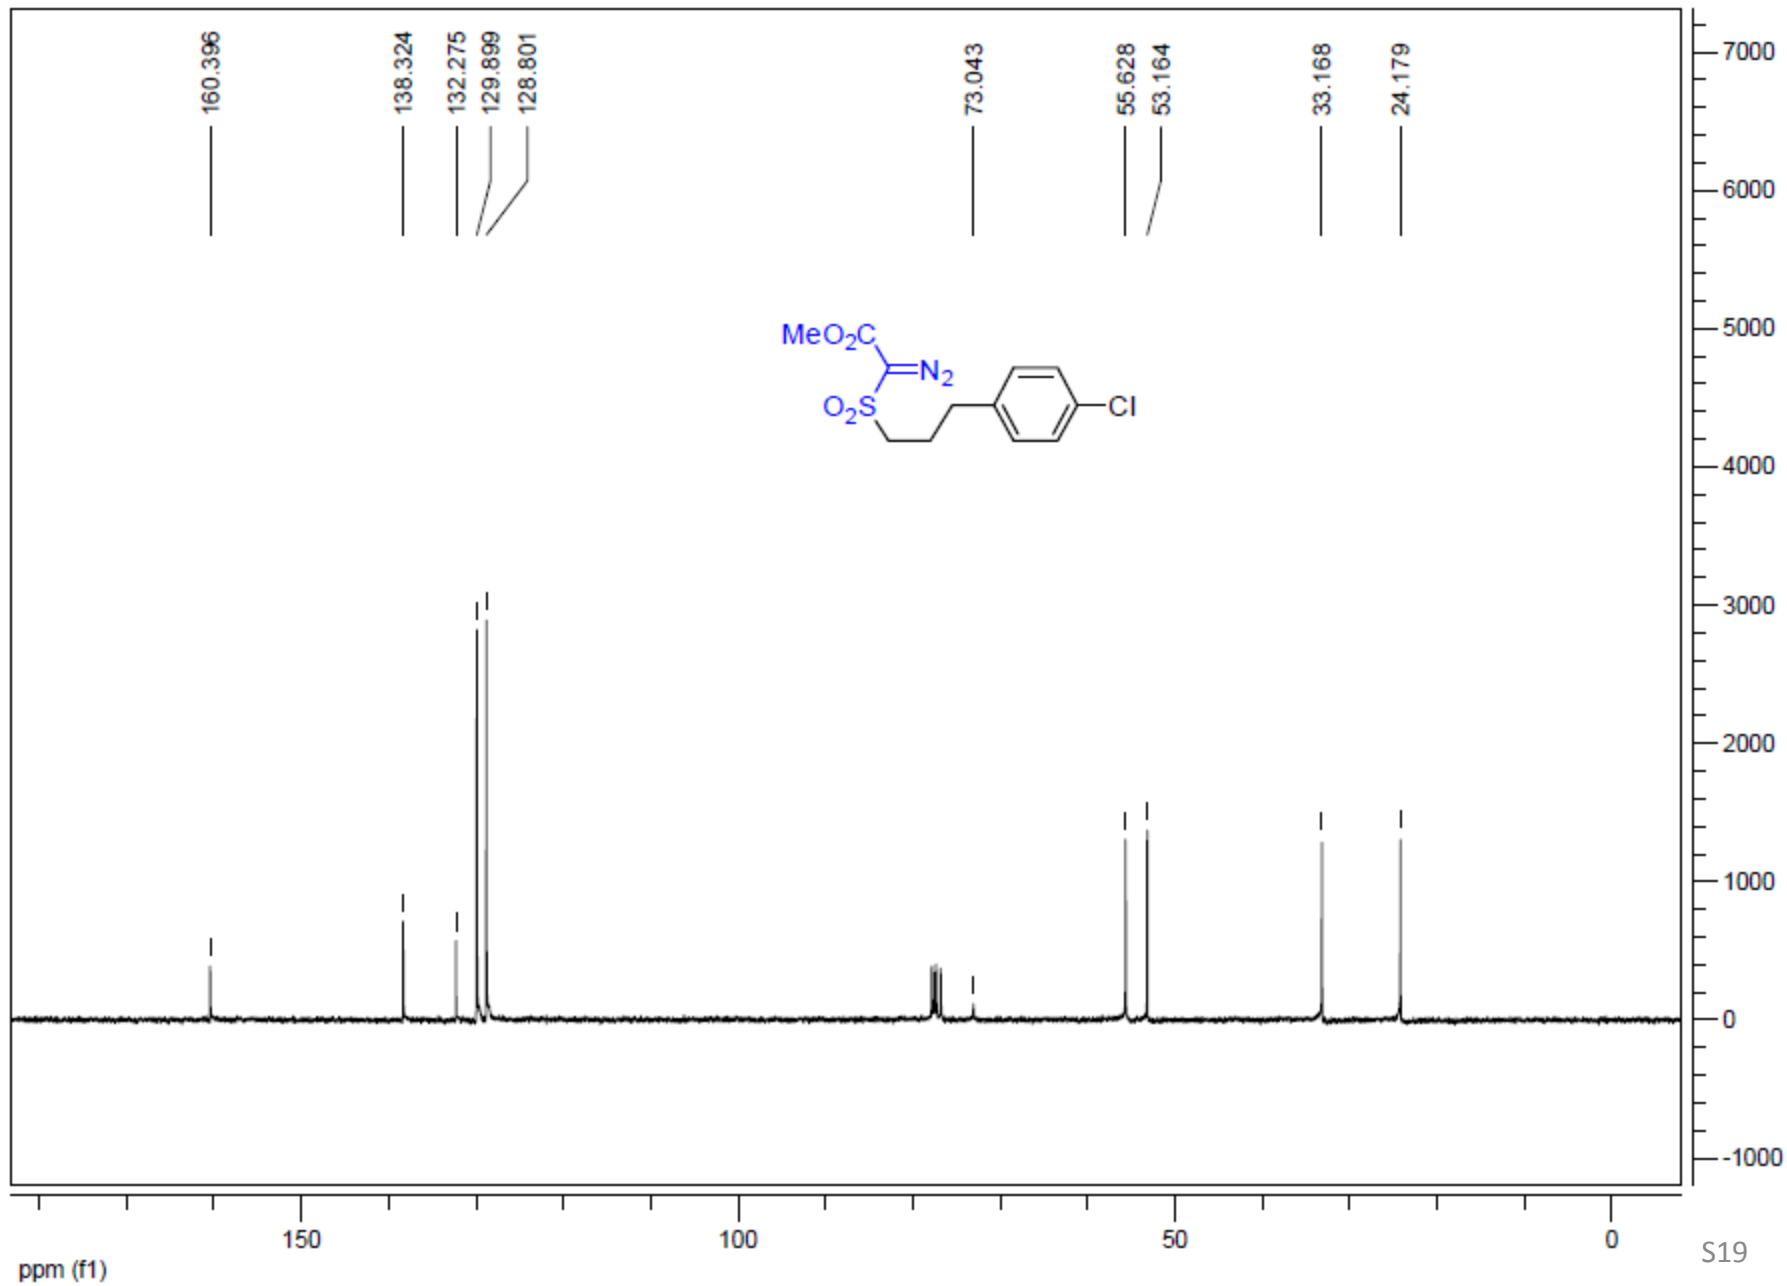



methyl 2-diazo-2-((3-(3,5-dichlorophenyl)propyl)sulfonyl)acetate (**1e**)

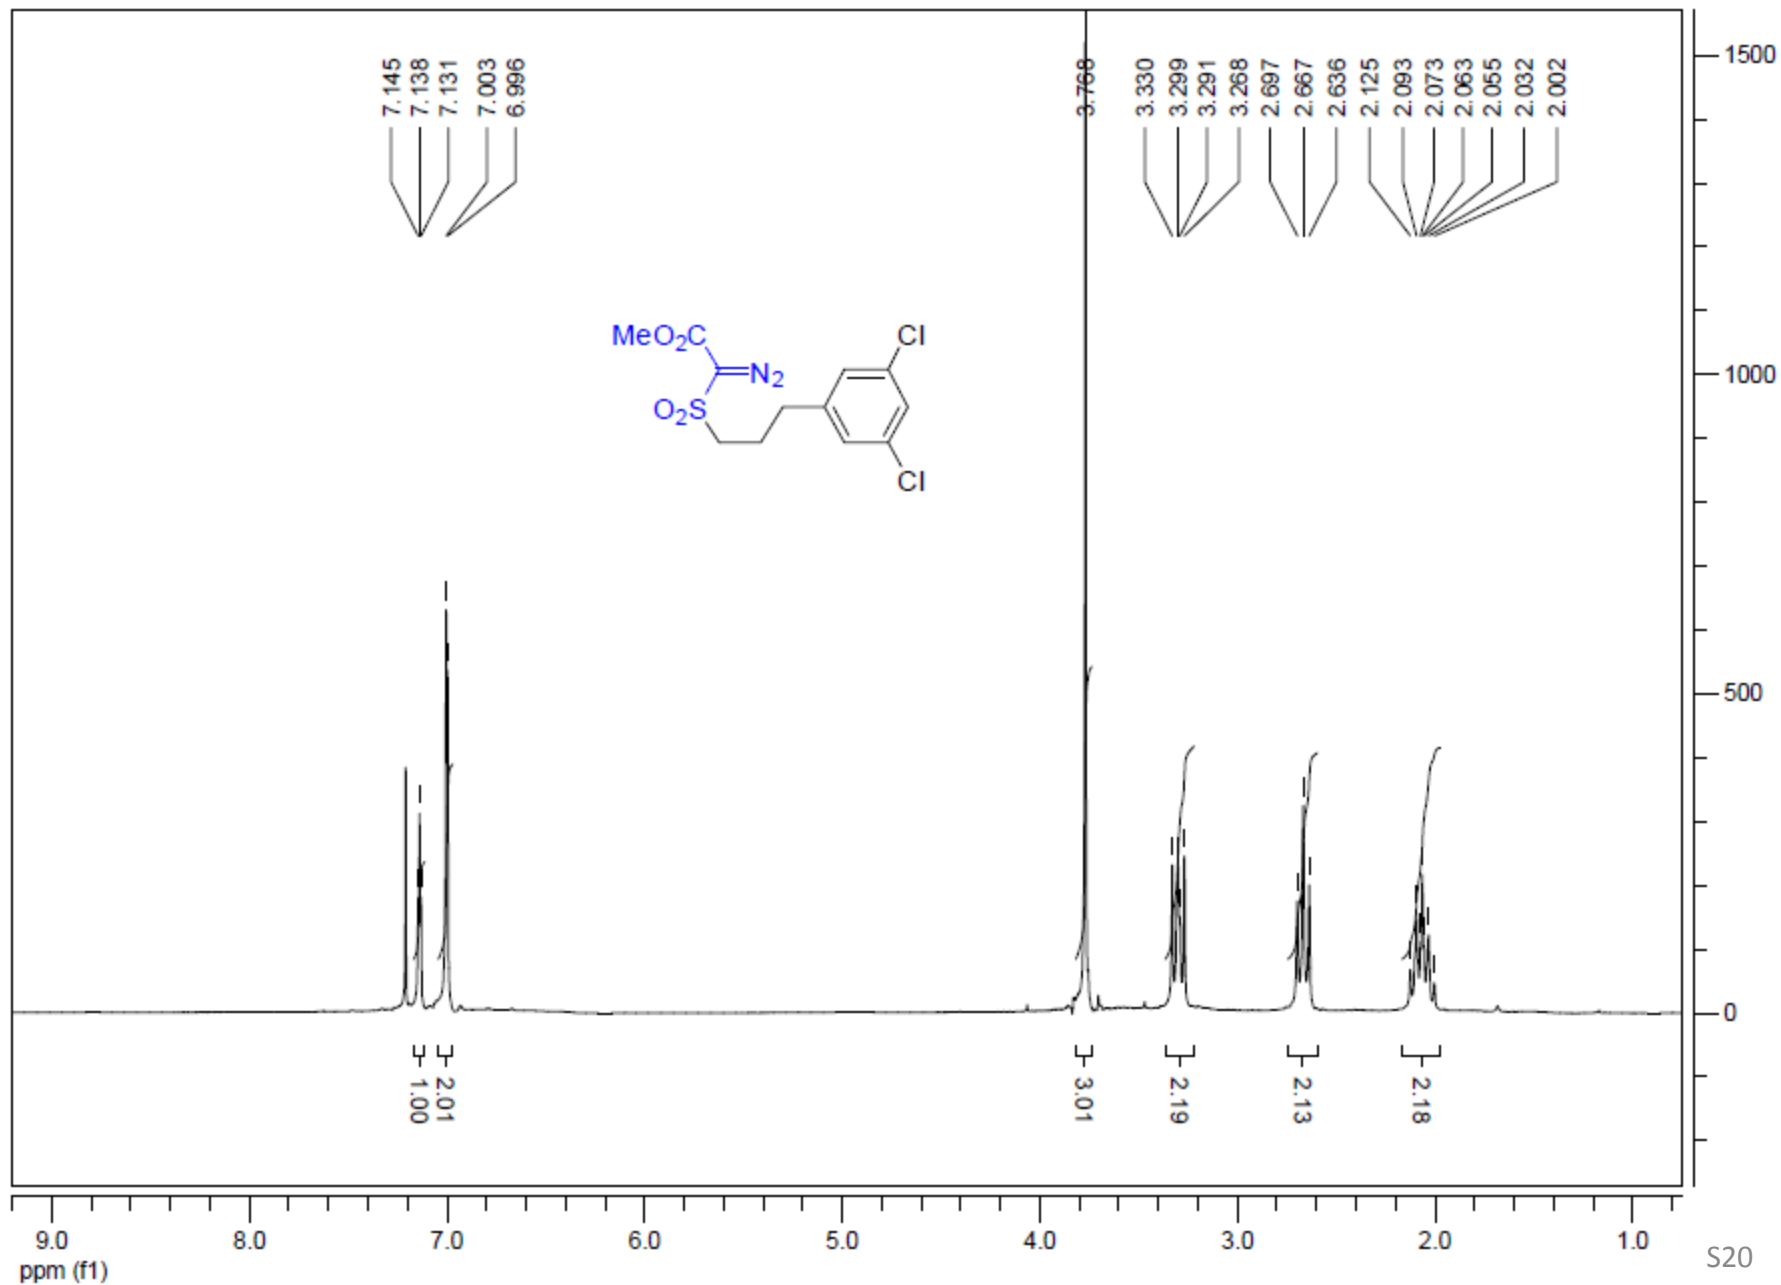

methyl 2-diazo-2-((3-(3,5-dichlorophenyl)propyl)sulfonyl)acetate (**1e**)

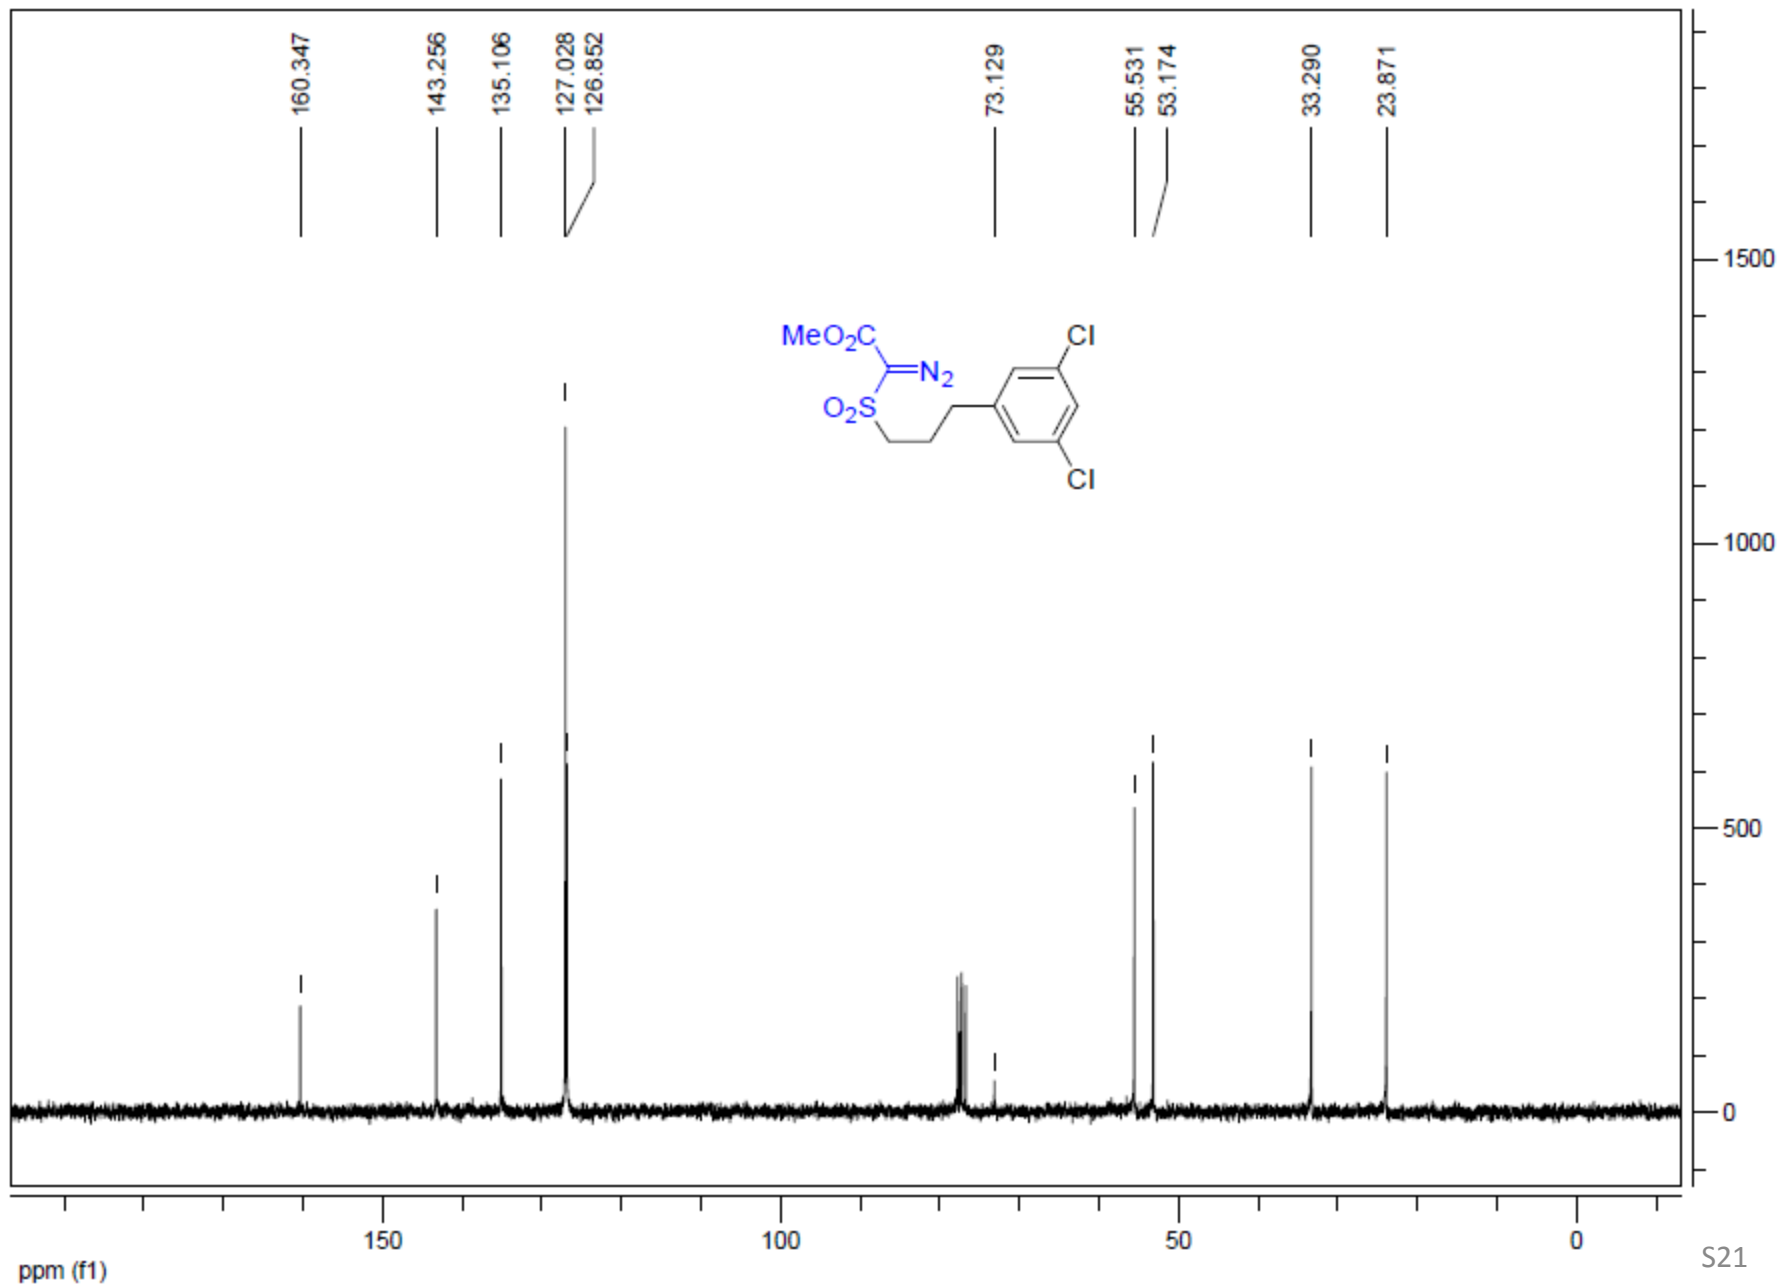

methyl 2-((3-(3-bromophenyl)propyl)sulfonyl)-2-diazoacetate (**1f**)

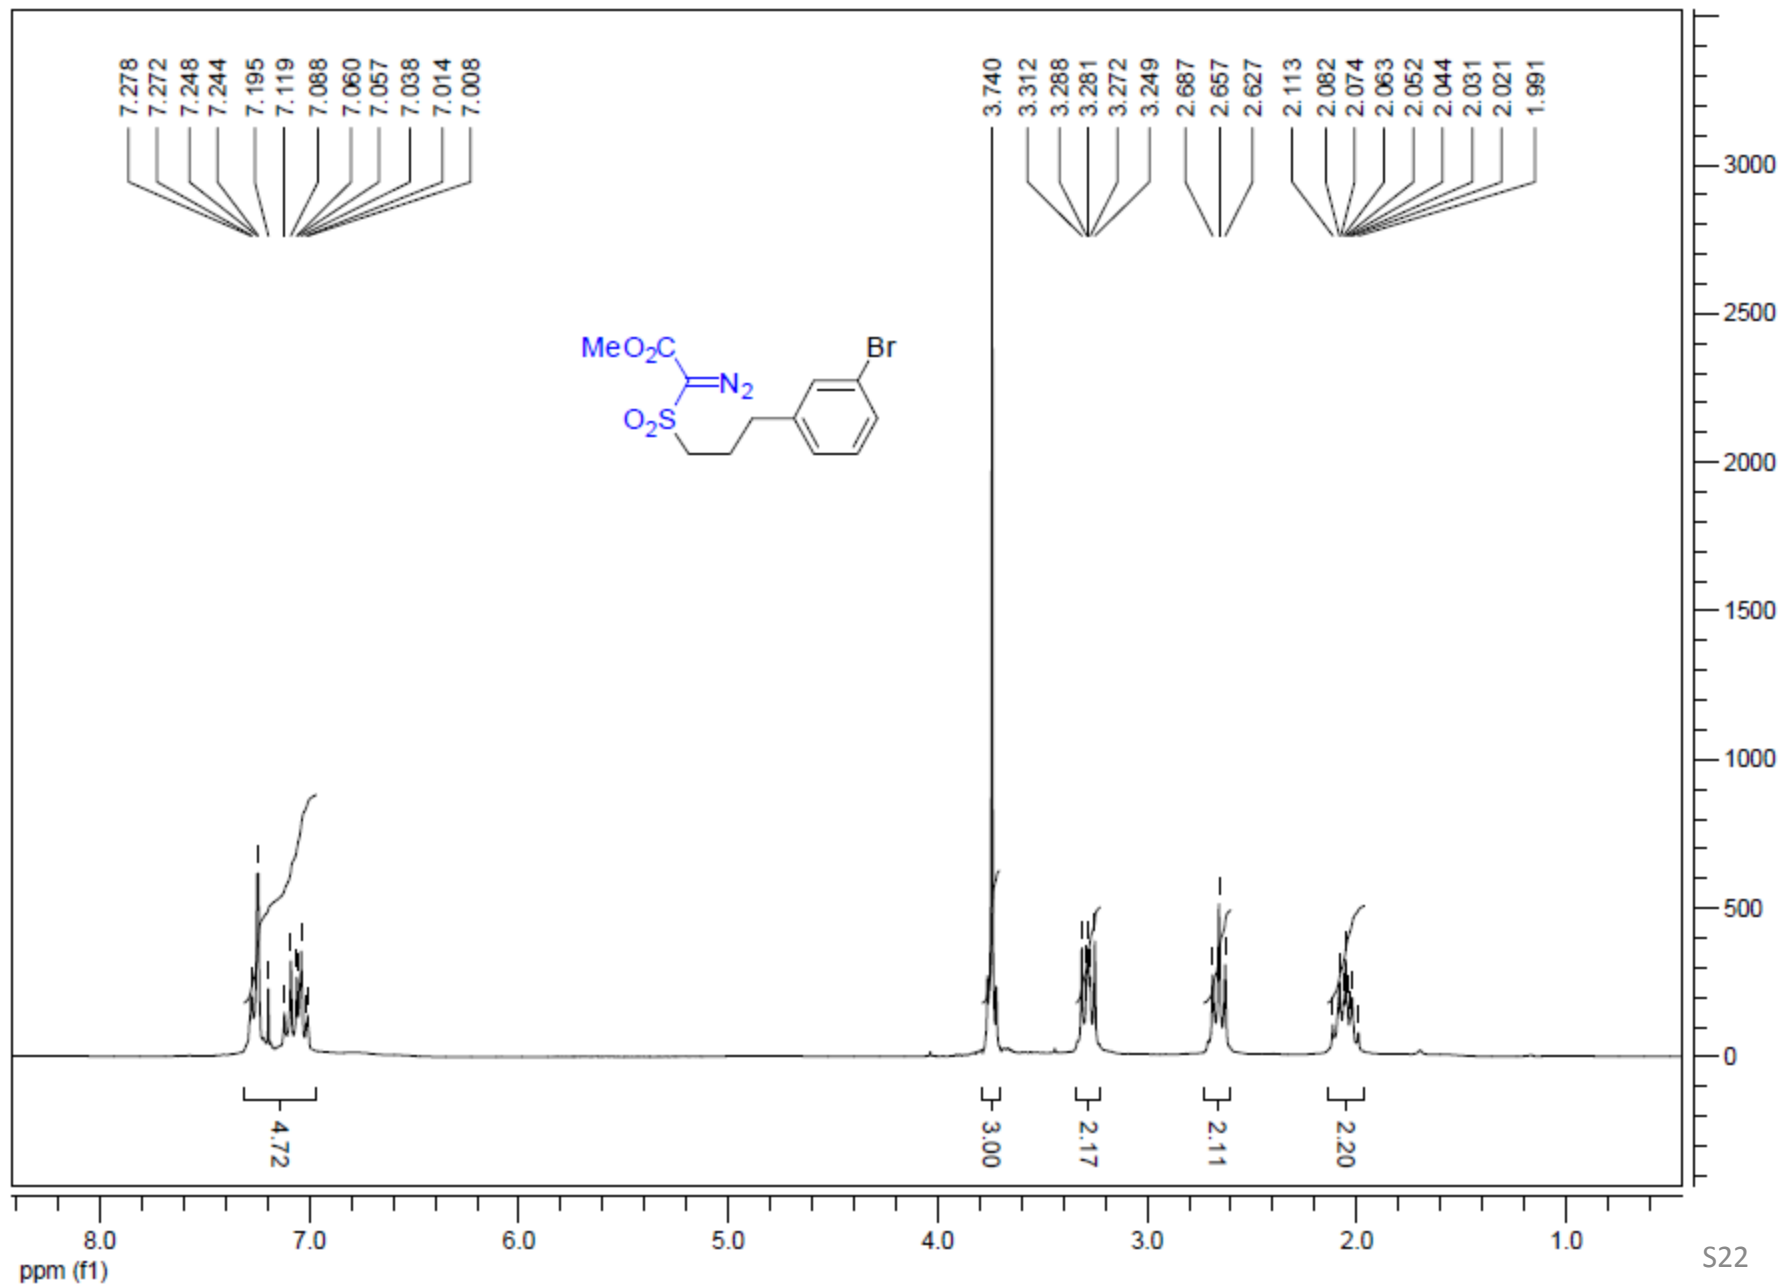

methyl 2-((3-(3-bromophenyl)propyl)sulfonyl)-2-diazoacetate (**1f**)

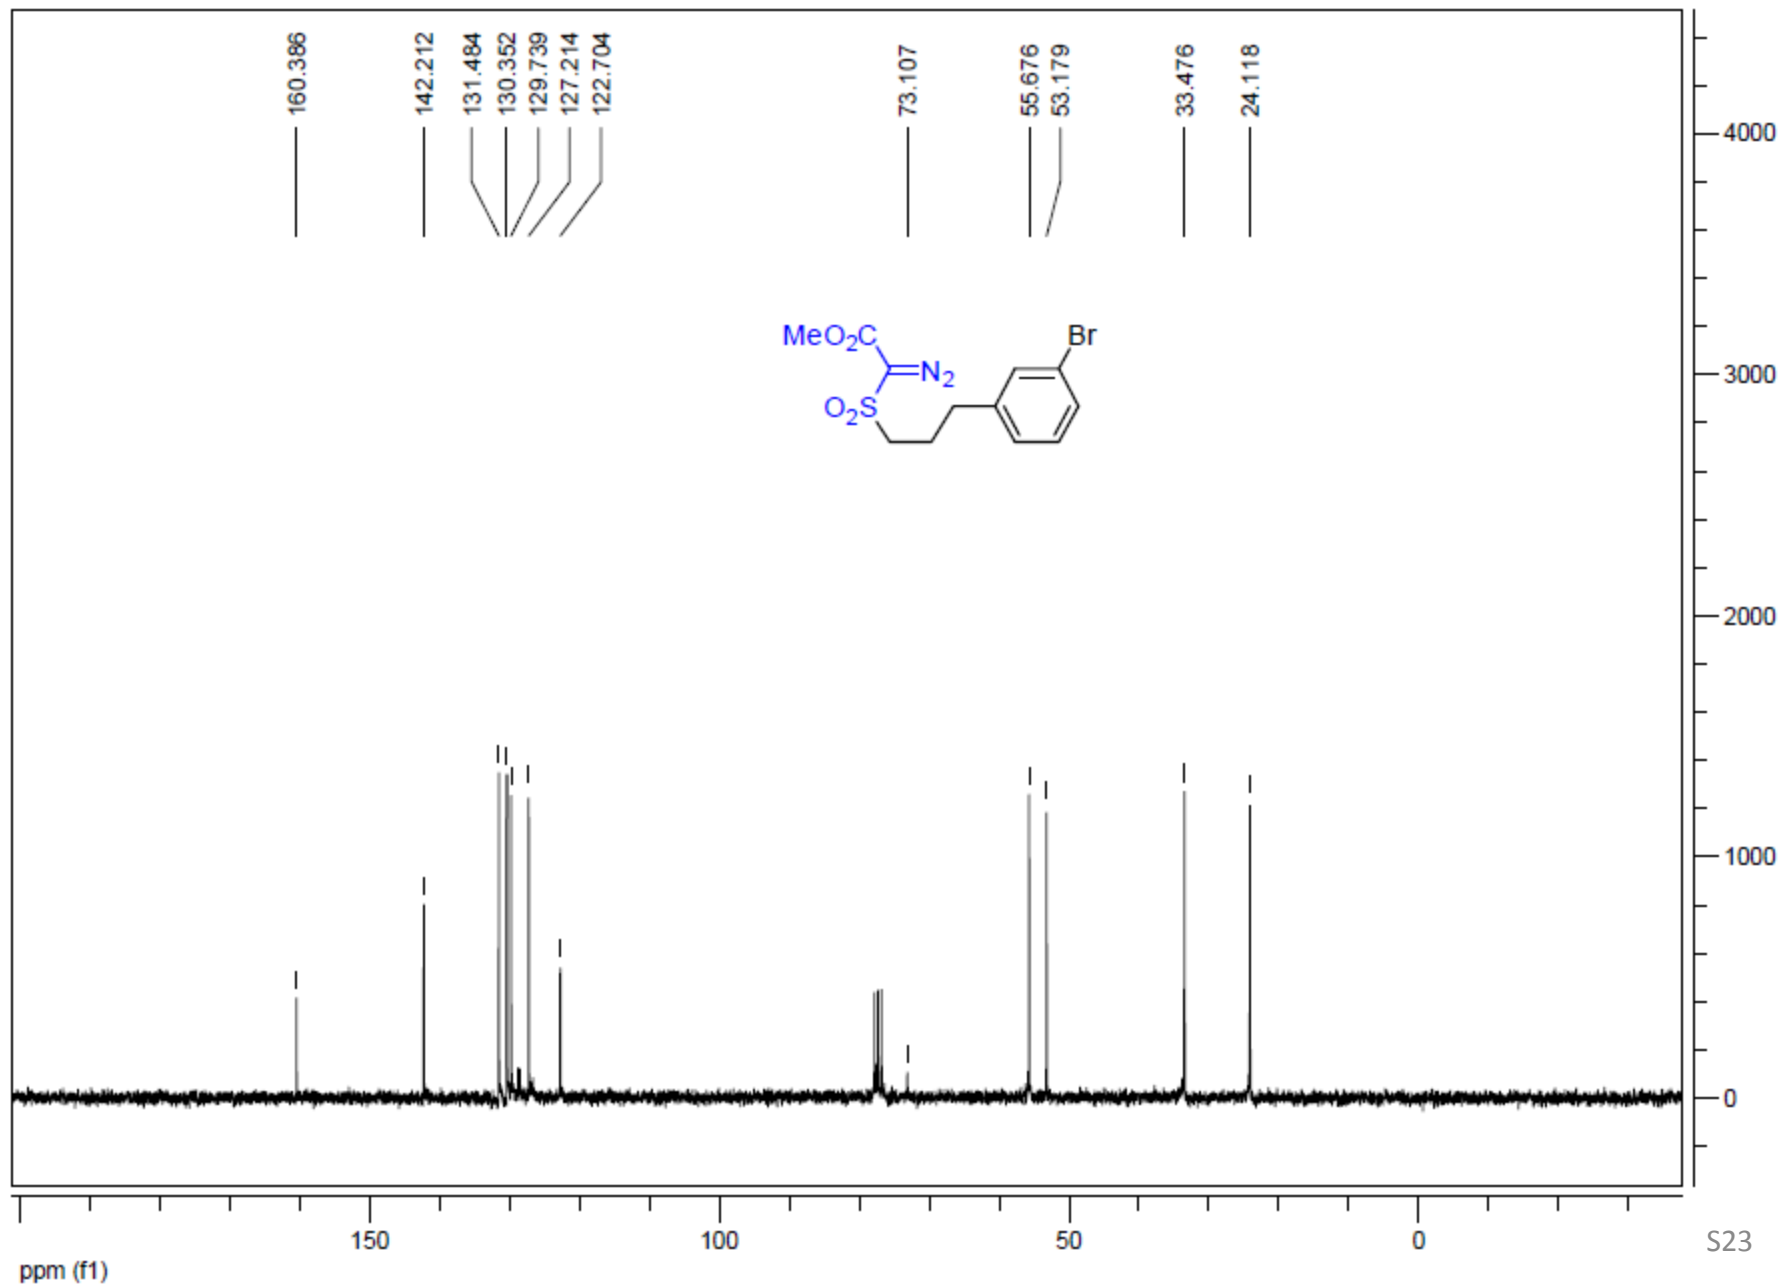

methyl 2-diazo-2-((3-phenylpropyl)sulfonyl)acetate (**1g**)

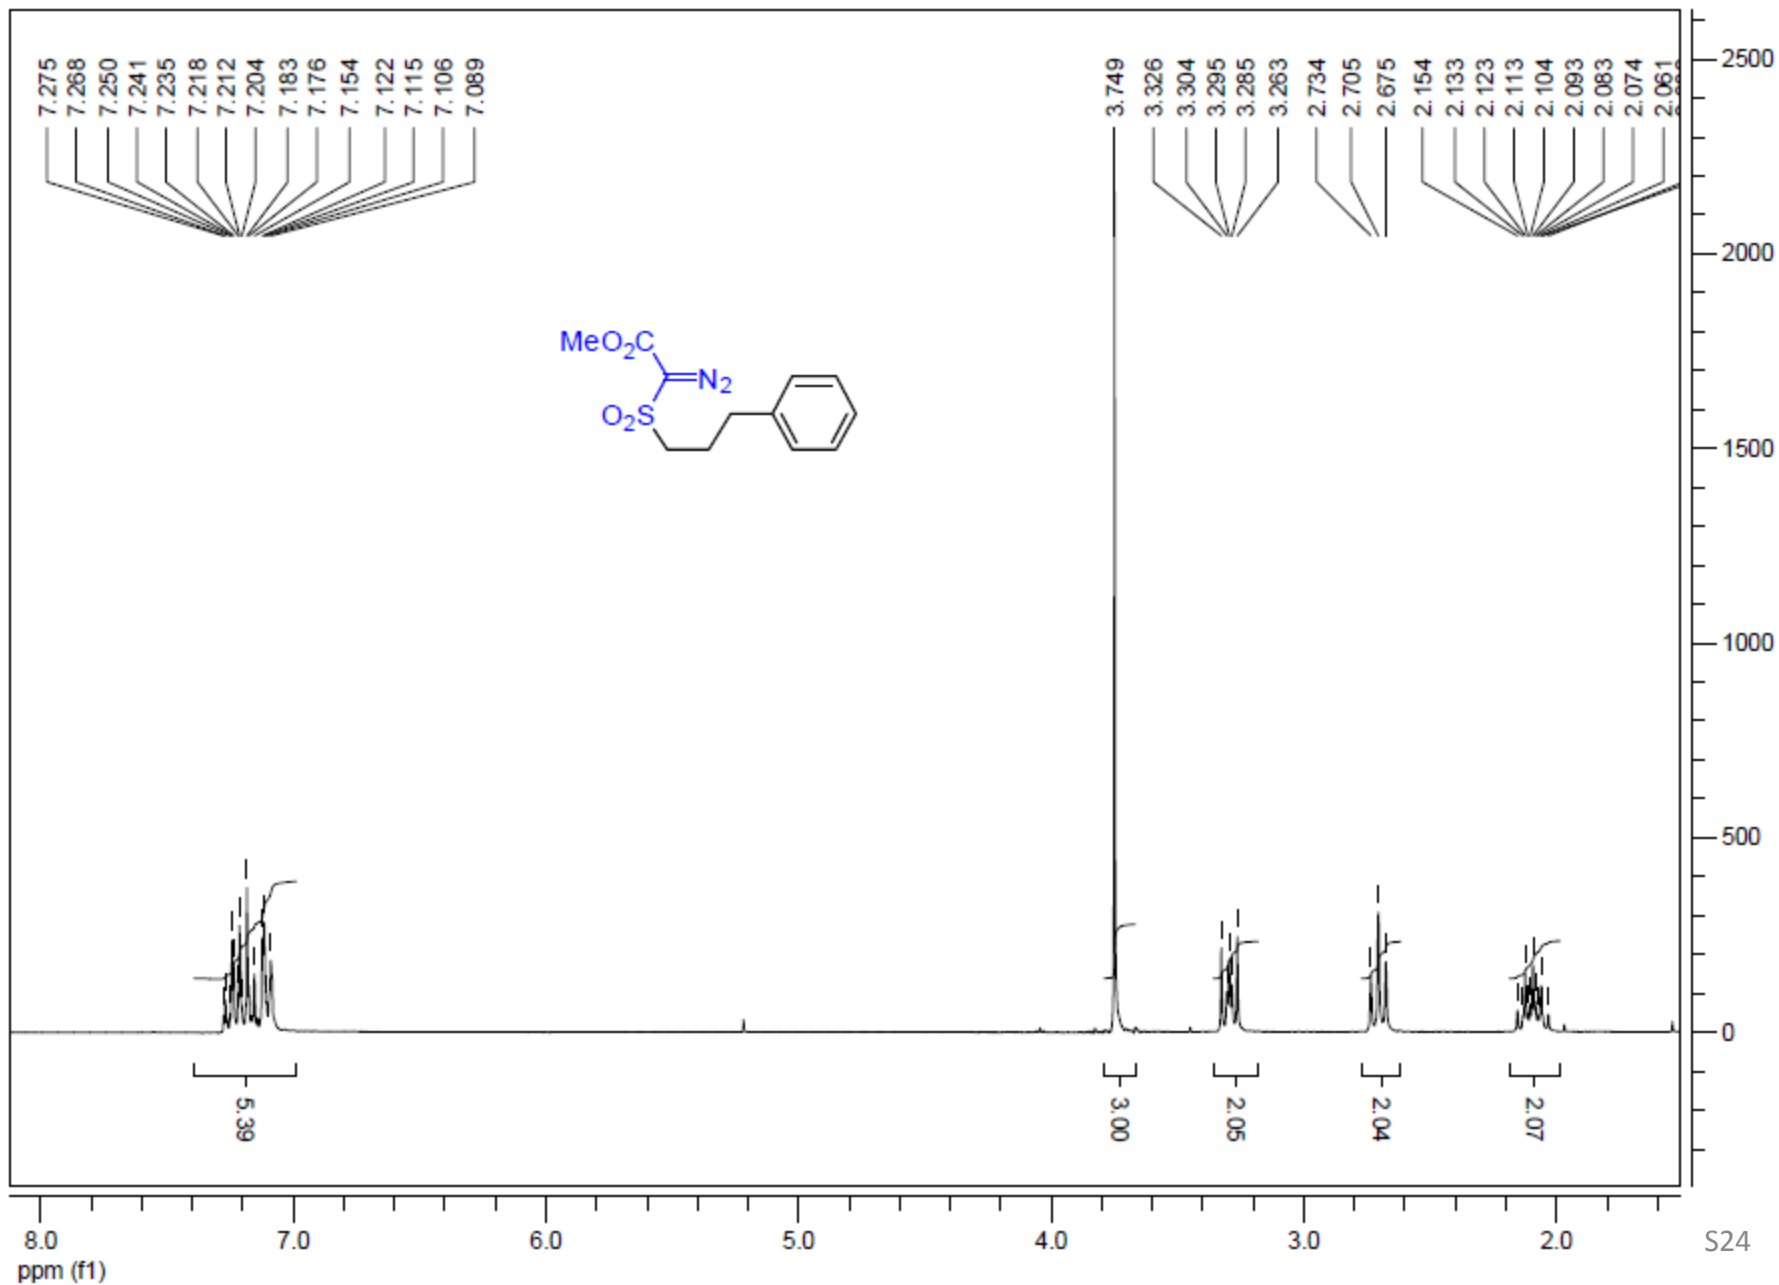

methyl 2-diazo-2-((3-phenylpropyl)sulfonyl)acetate (**1g**)

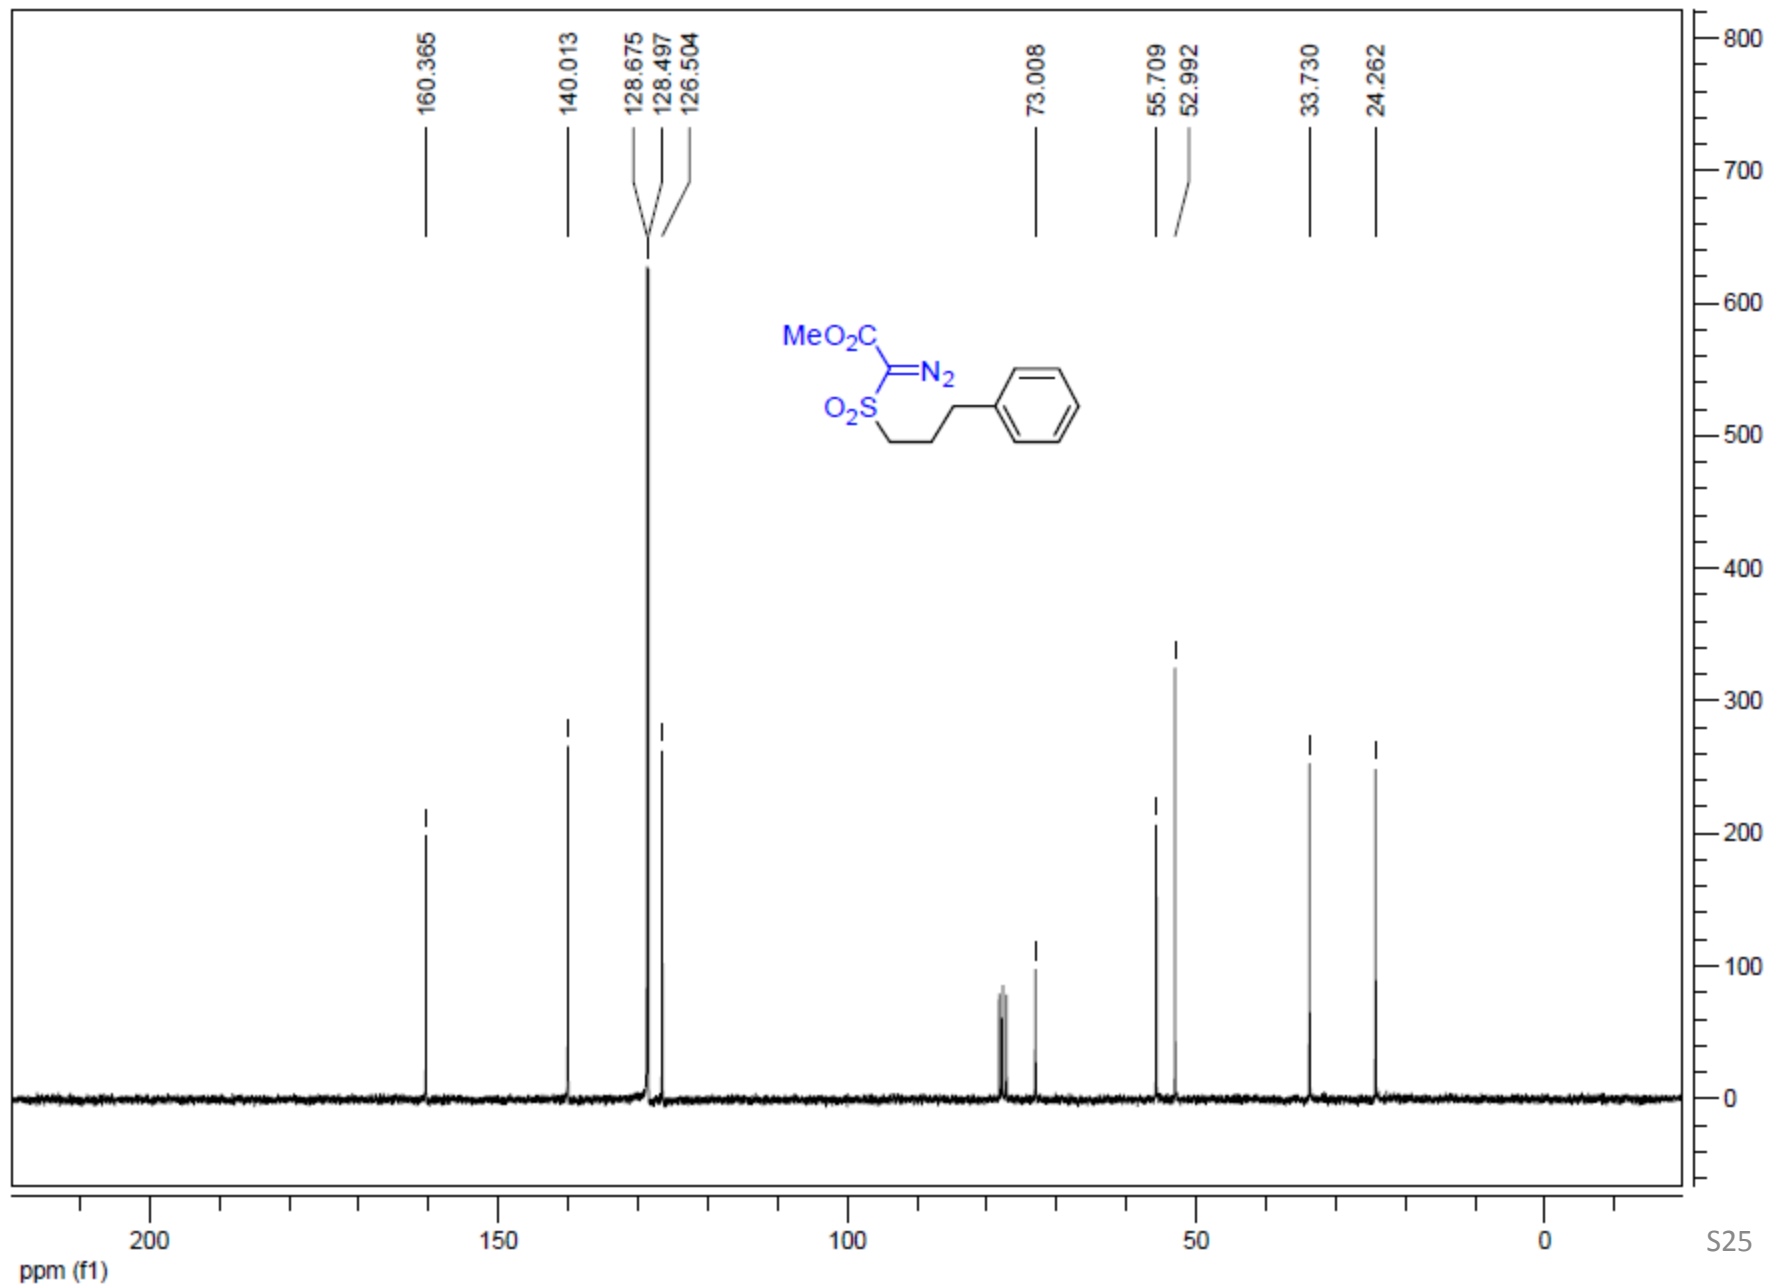

methyl 2-diazo-2-((3-(p-tolyl)propyl)sulfonyl)acetate (**1h**)

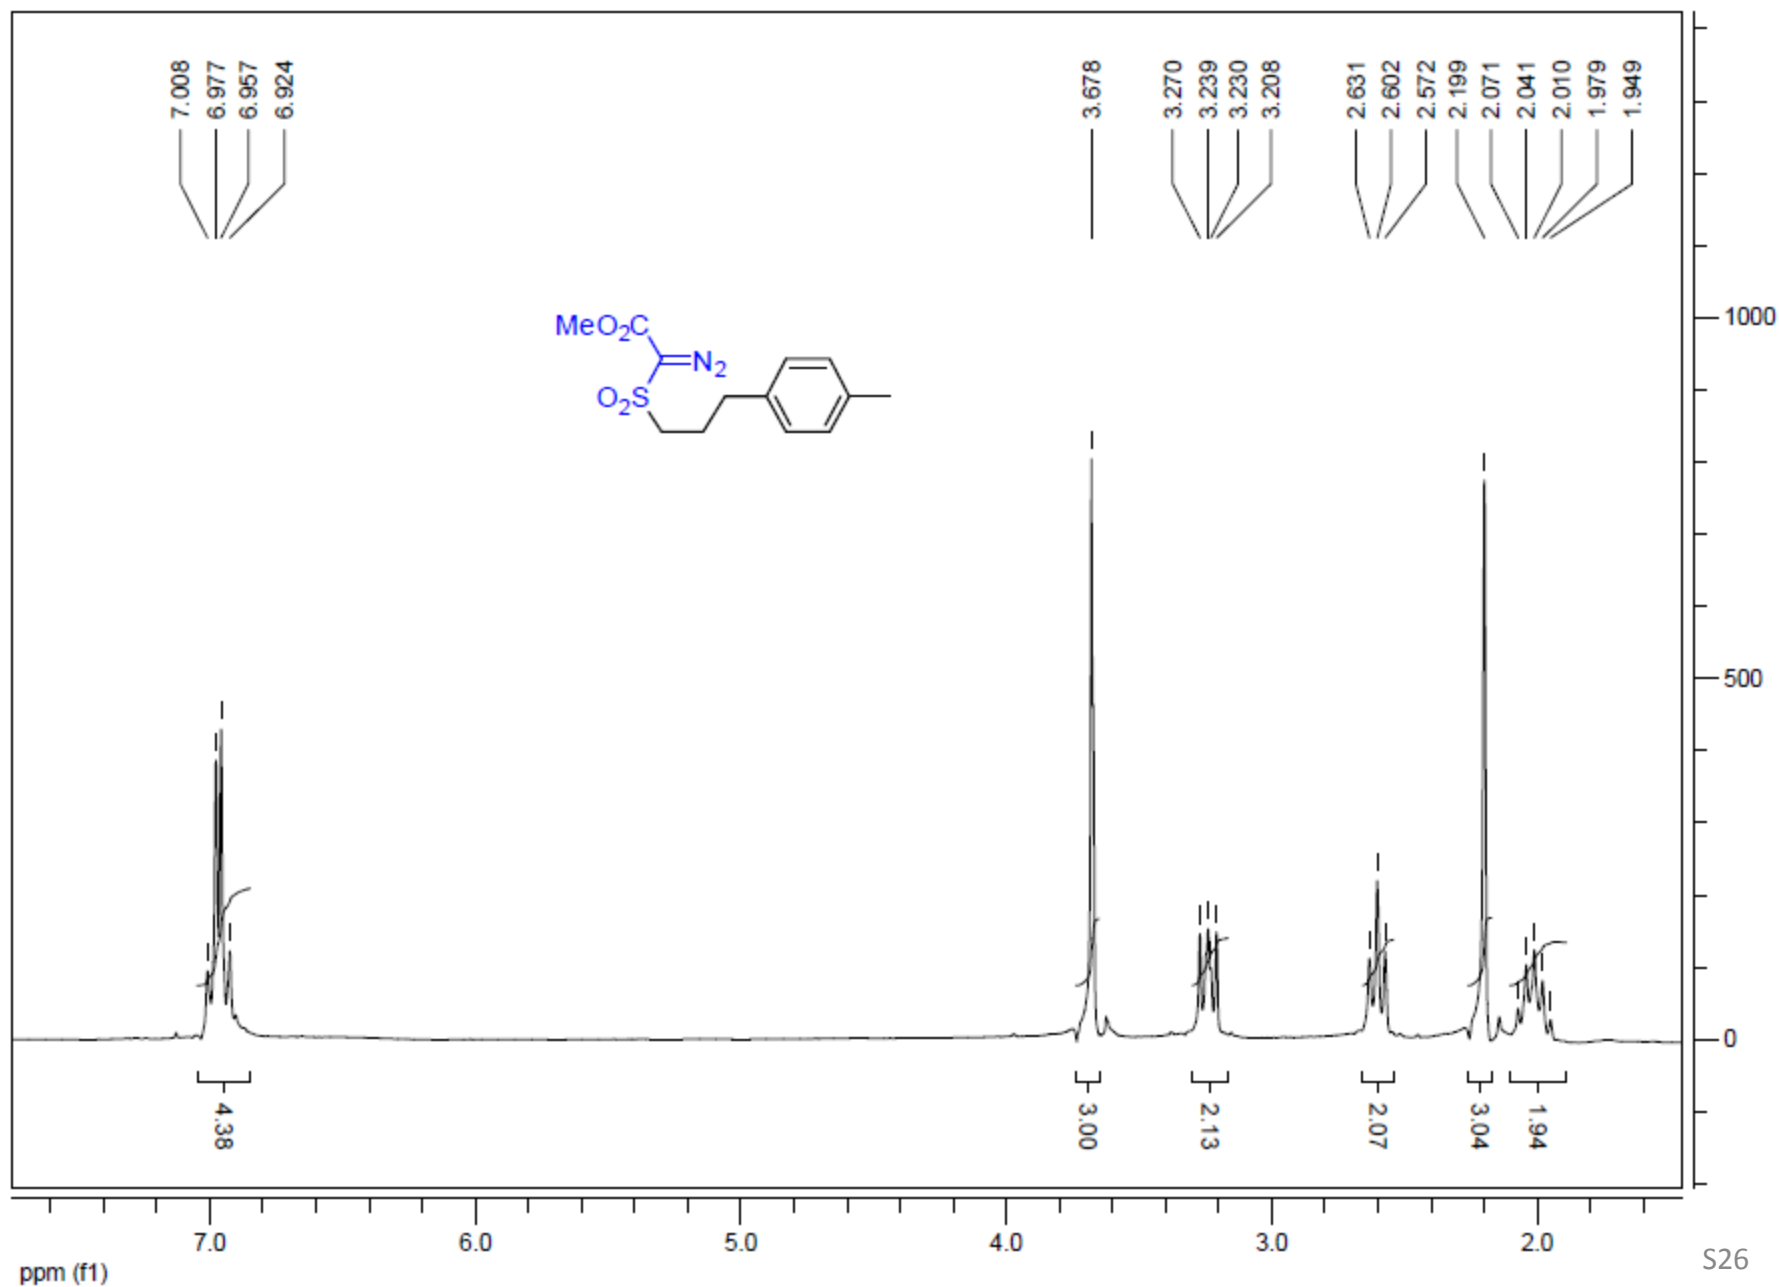

methyl 2-diazo-2-((3-(p-tolyl)propyl)sulfonyl)acetate (**1h**)

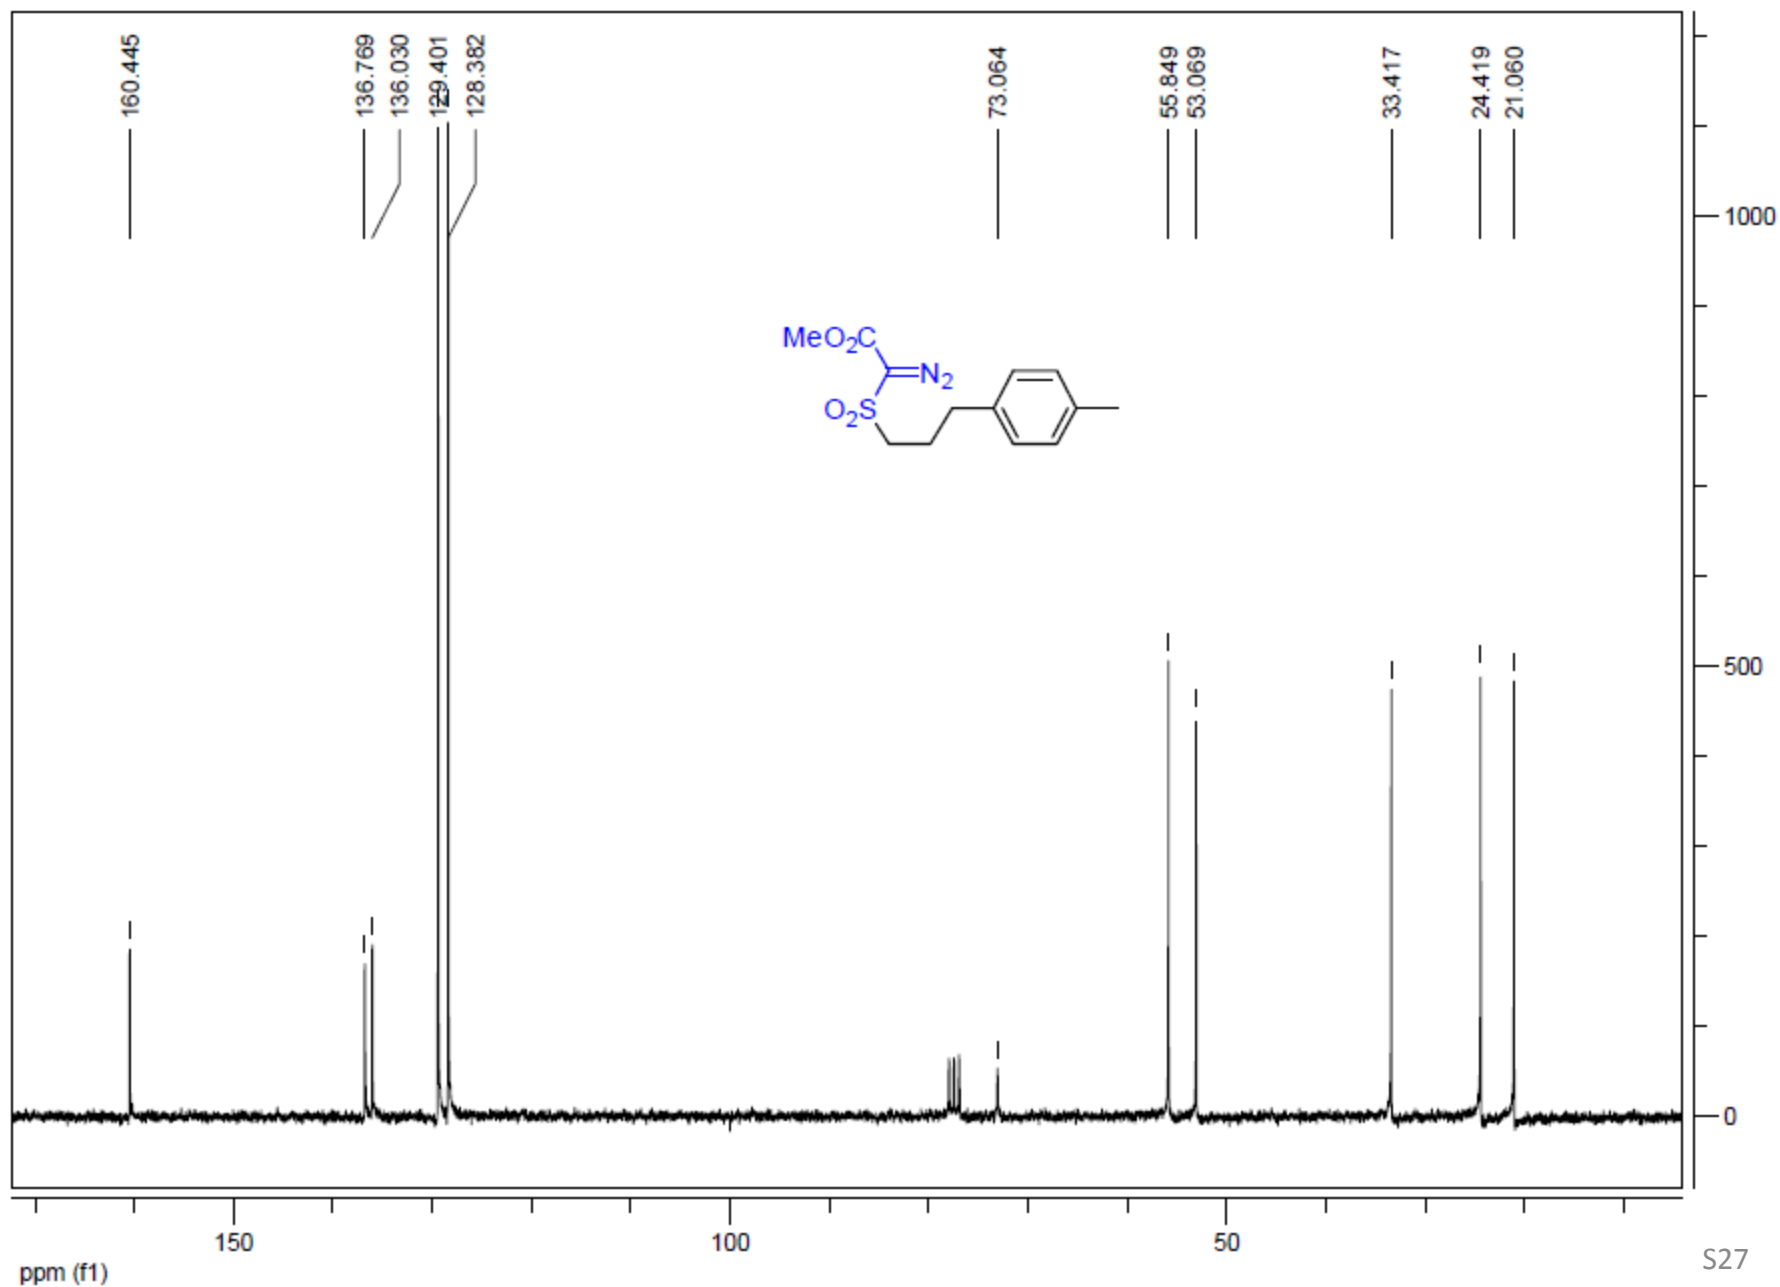



# methyl 2-diazo-2-((3-(4-methoxyphenyl)propyl)sulfonyl)acetate (**1i**)

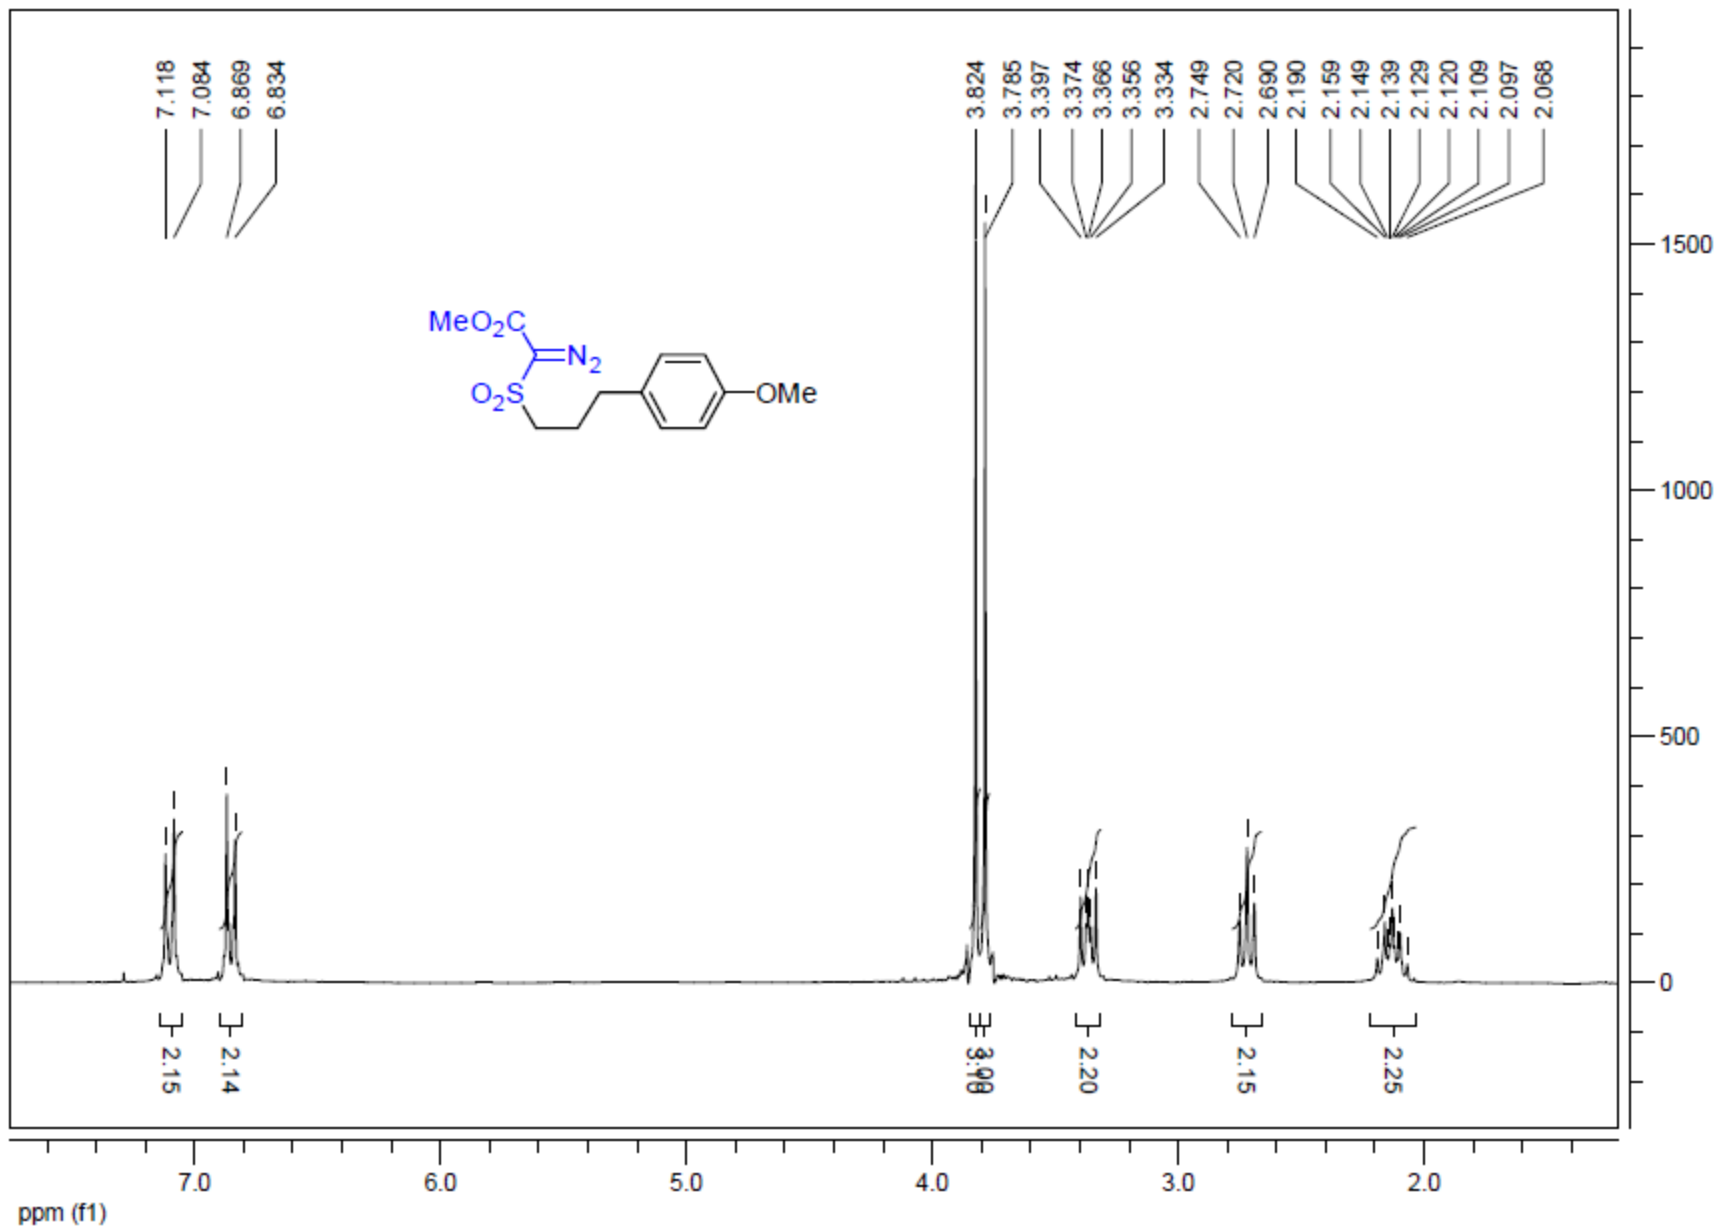

methyl 2-diazo-2-((3-(4-methoxyphenyl)propyl)sulfonyl)acetate (**1i**)

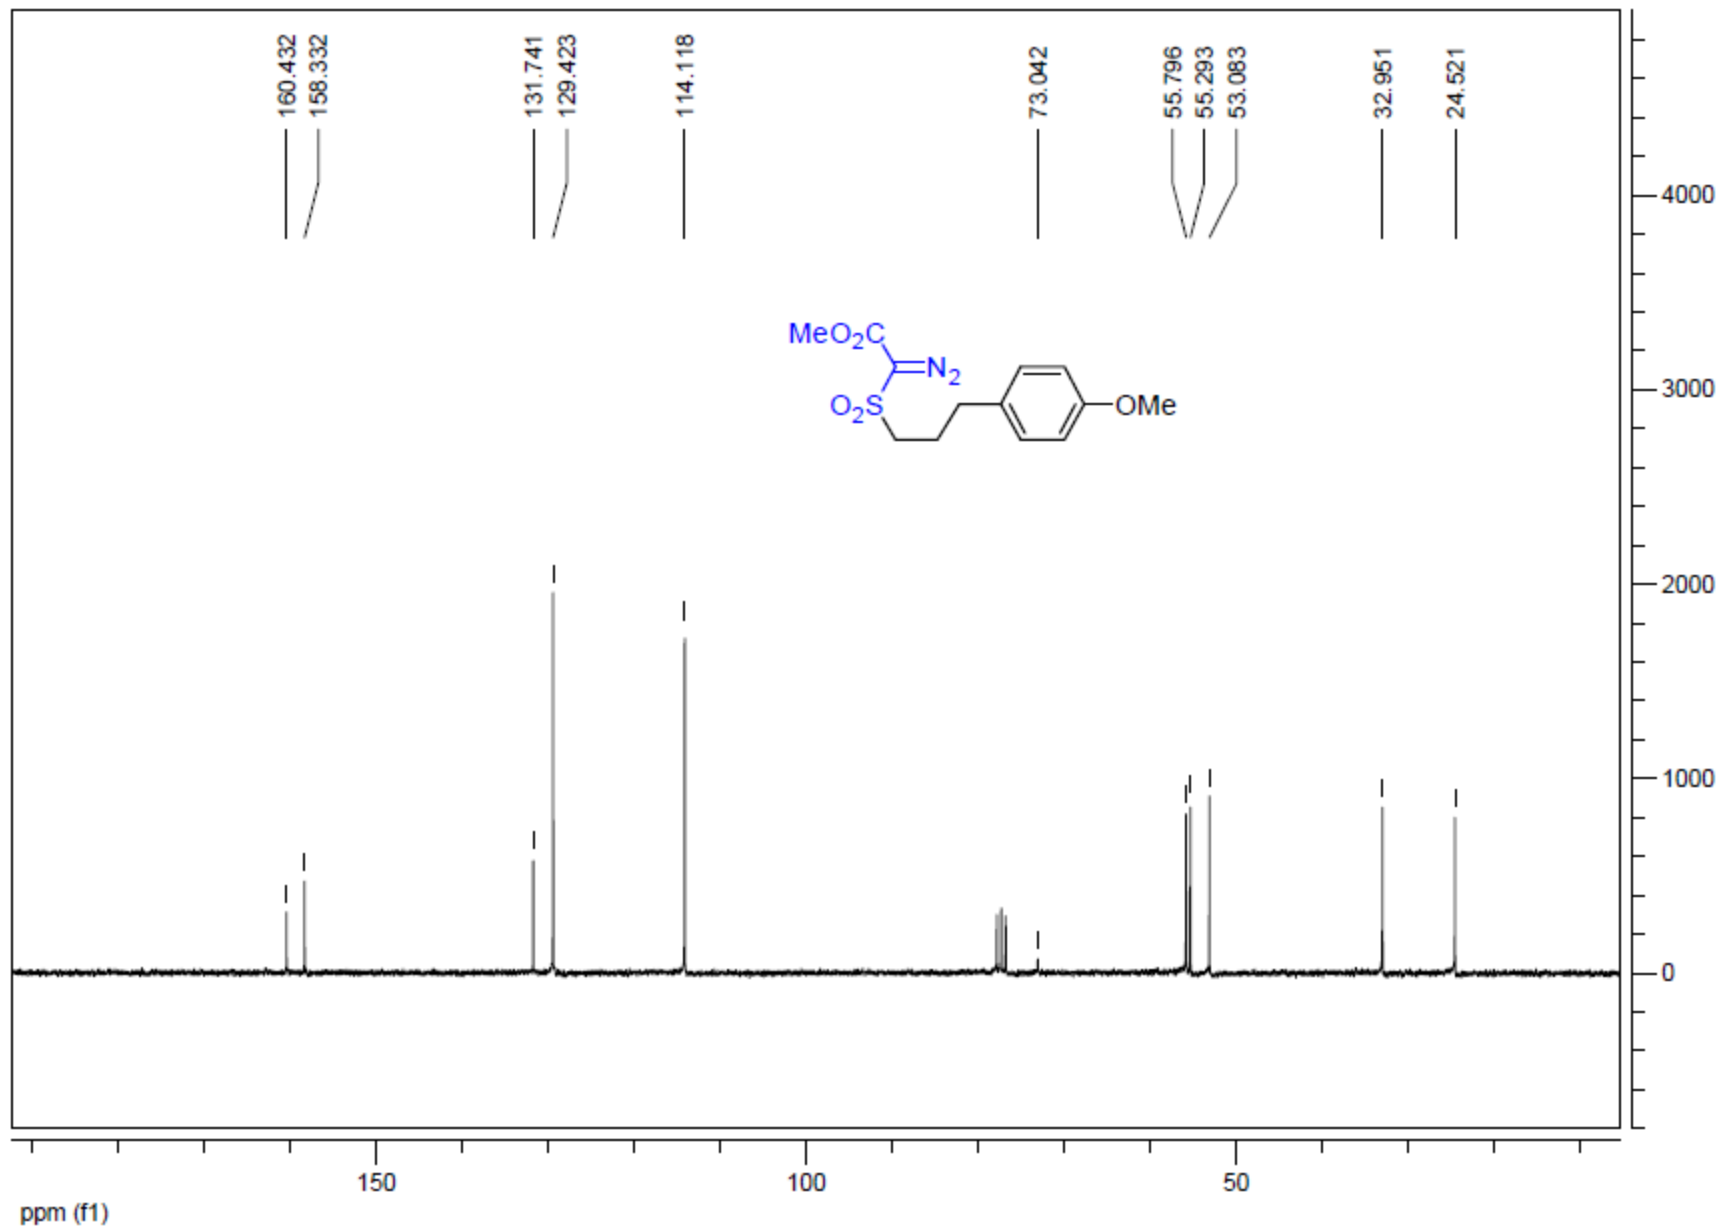

methyl 2-diazo-2-((3-(4-(methoxymethoxy)phenyl)propyl)sulfonyl)acetate (**1j**)

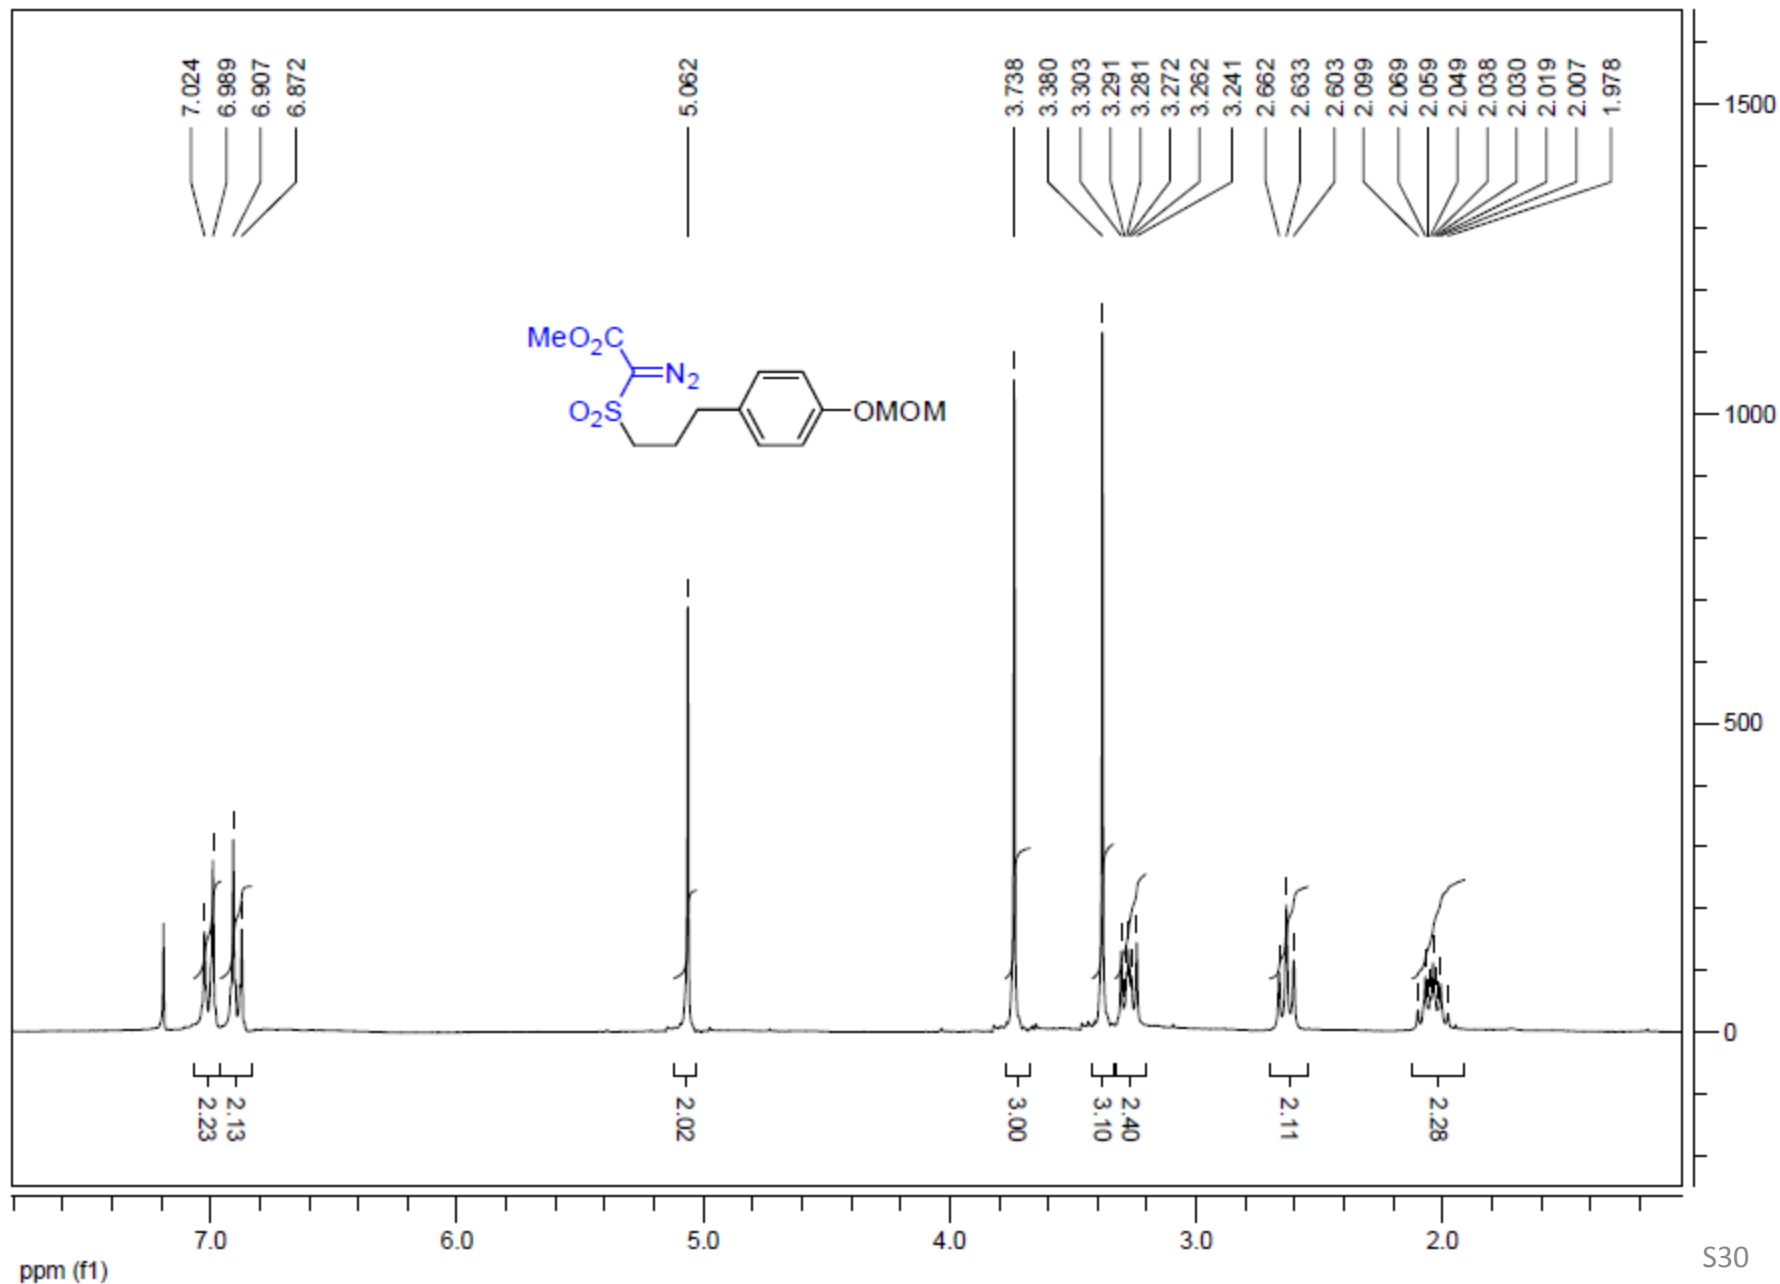

methyl 2-diazo-2-((3-(4-(methoxymethoxy)phenyl)propyl)sulfonyl)acetate (**1j**)

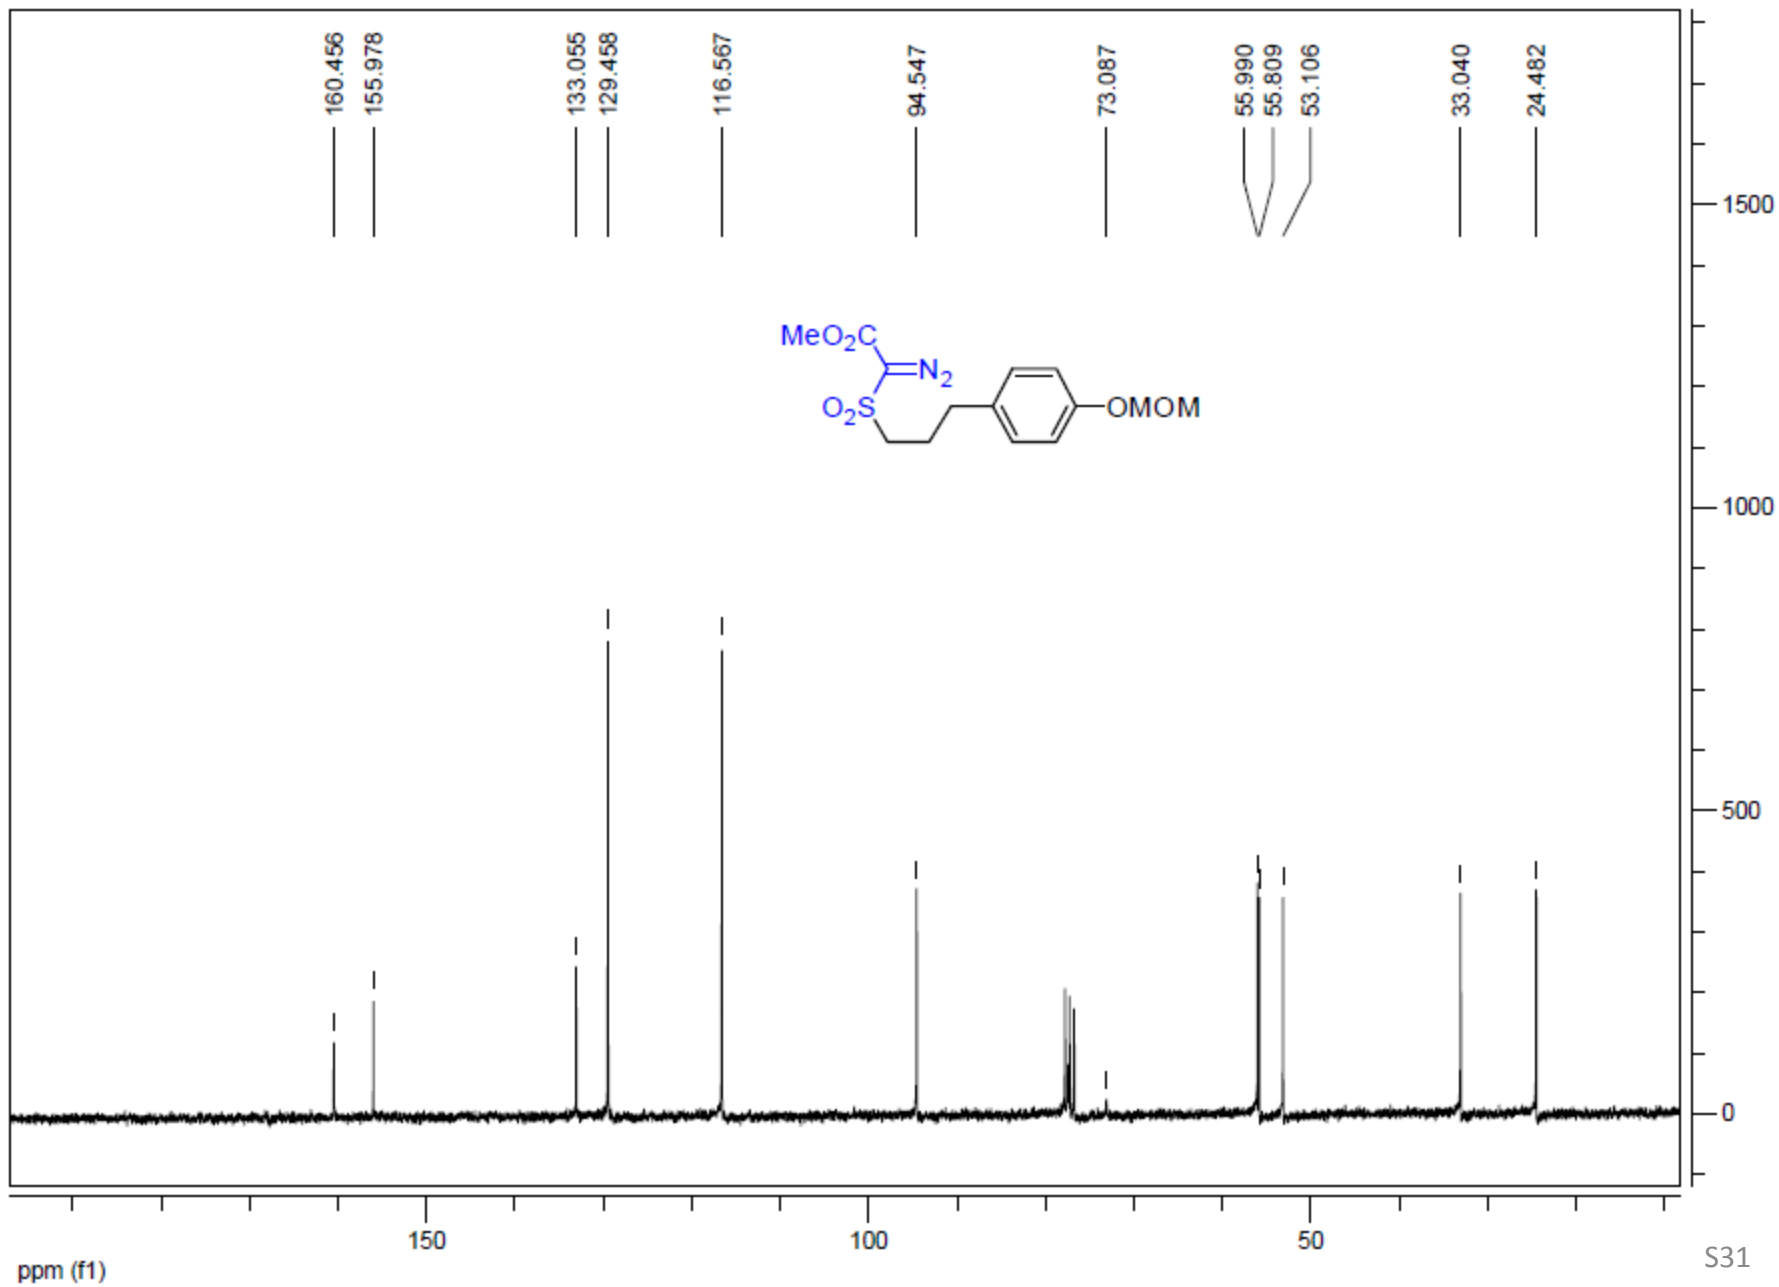

methyl 2-diazo-2-((3-(4-hydroxyphenyl)propyl)sulfonyl)acetate (**1k**)

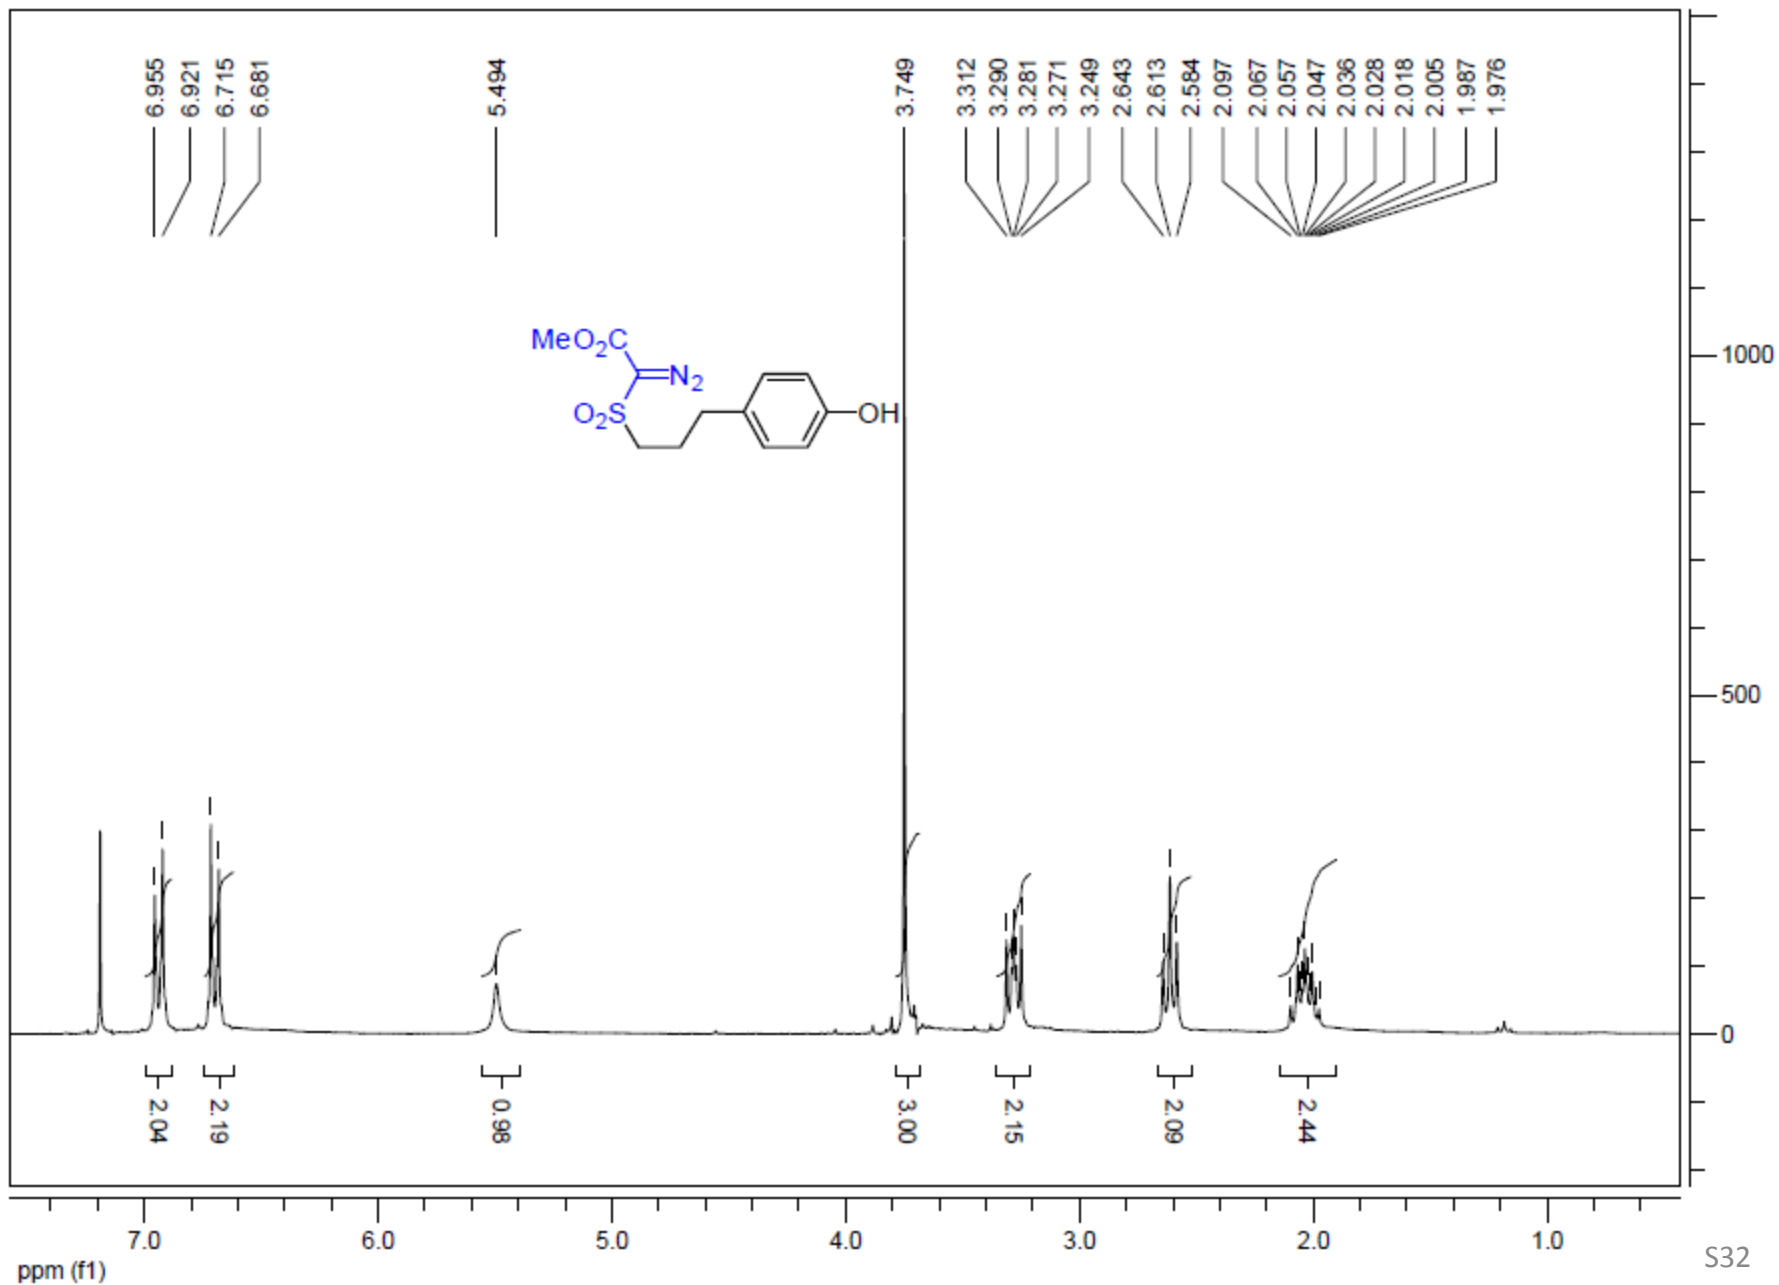

# methyl 2-diazo-2-((3-(4-hydroxyphenyl)propyl)sulfonyl)acetate (**1k**)

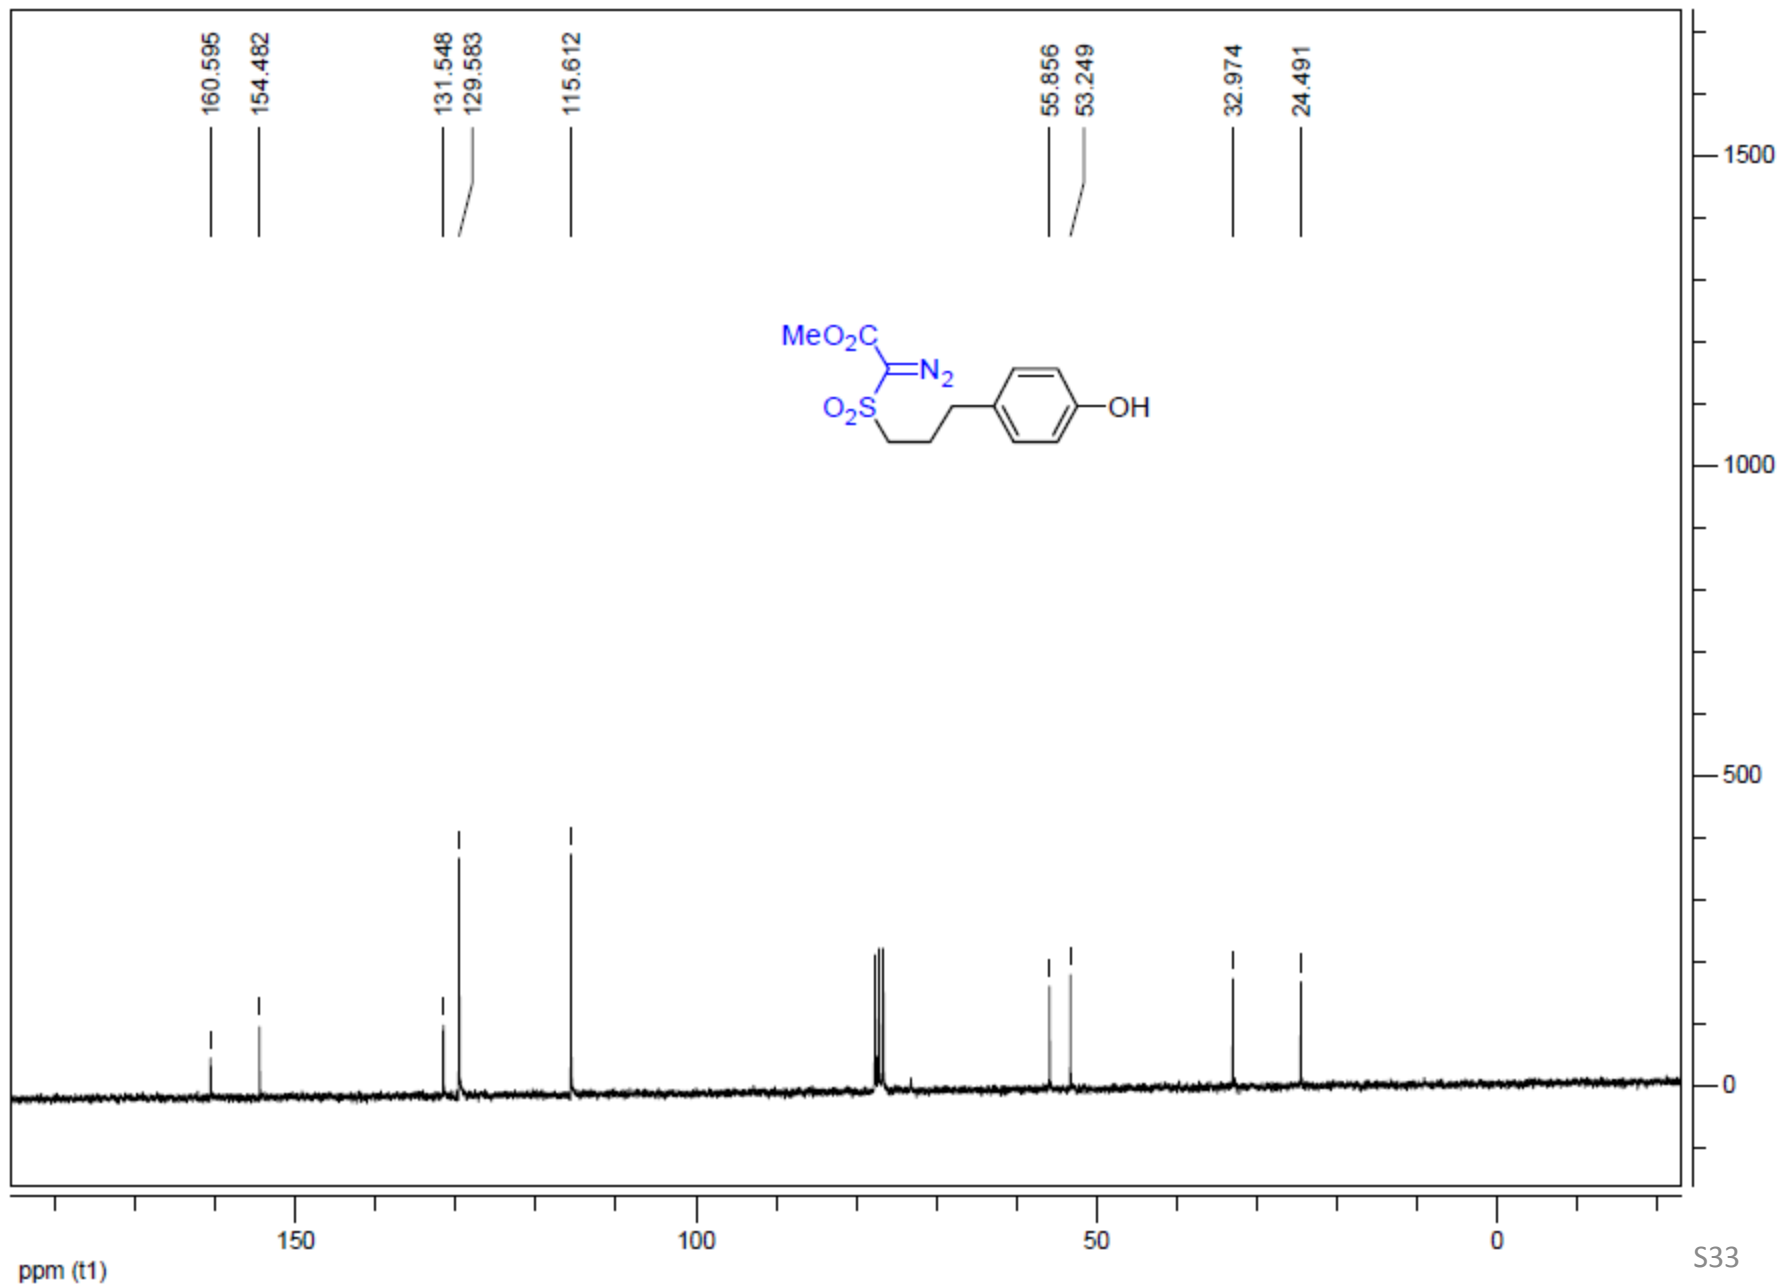

methyl 2-((3-(4-aminophenyl)propyl)sulfonyl)-2-diazoacetate (**1I**)

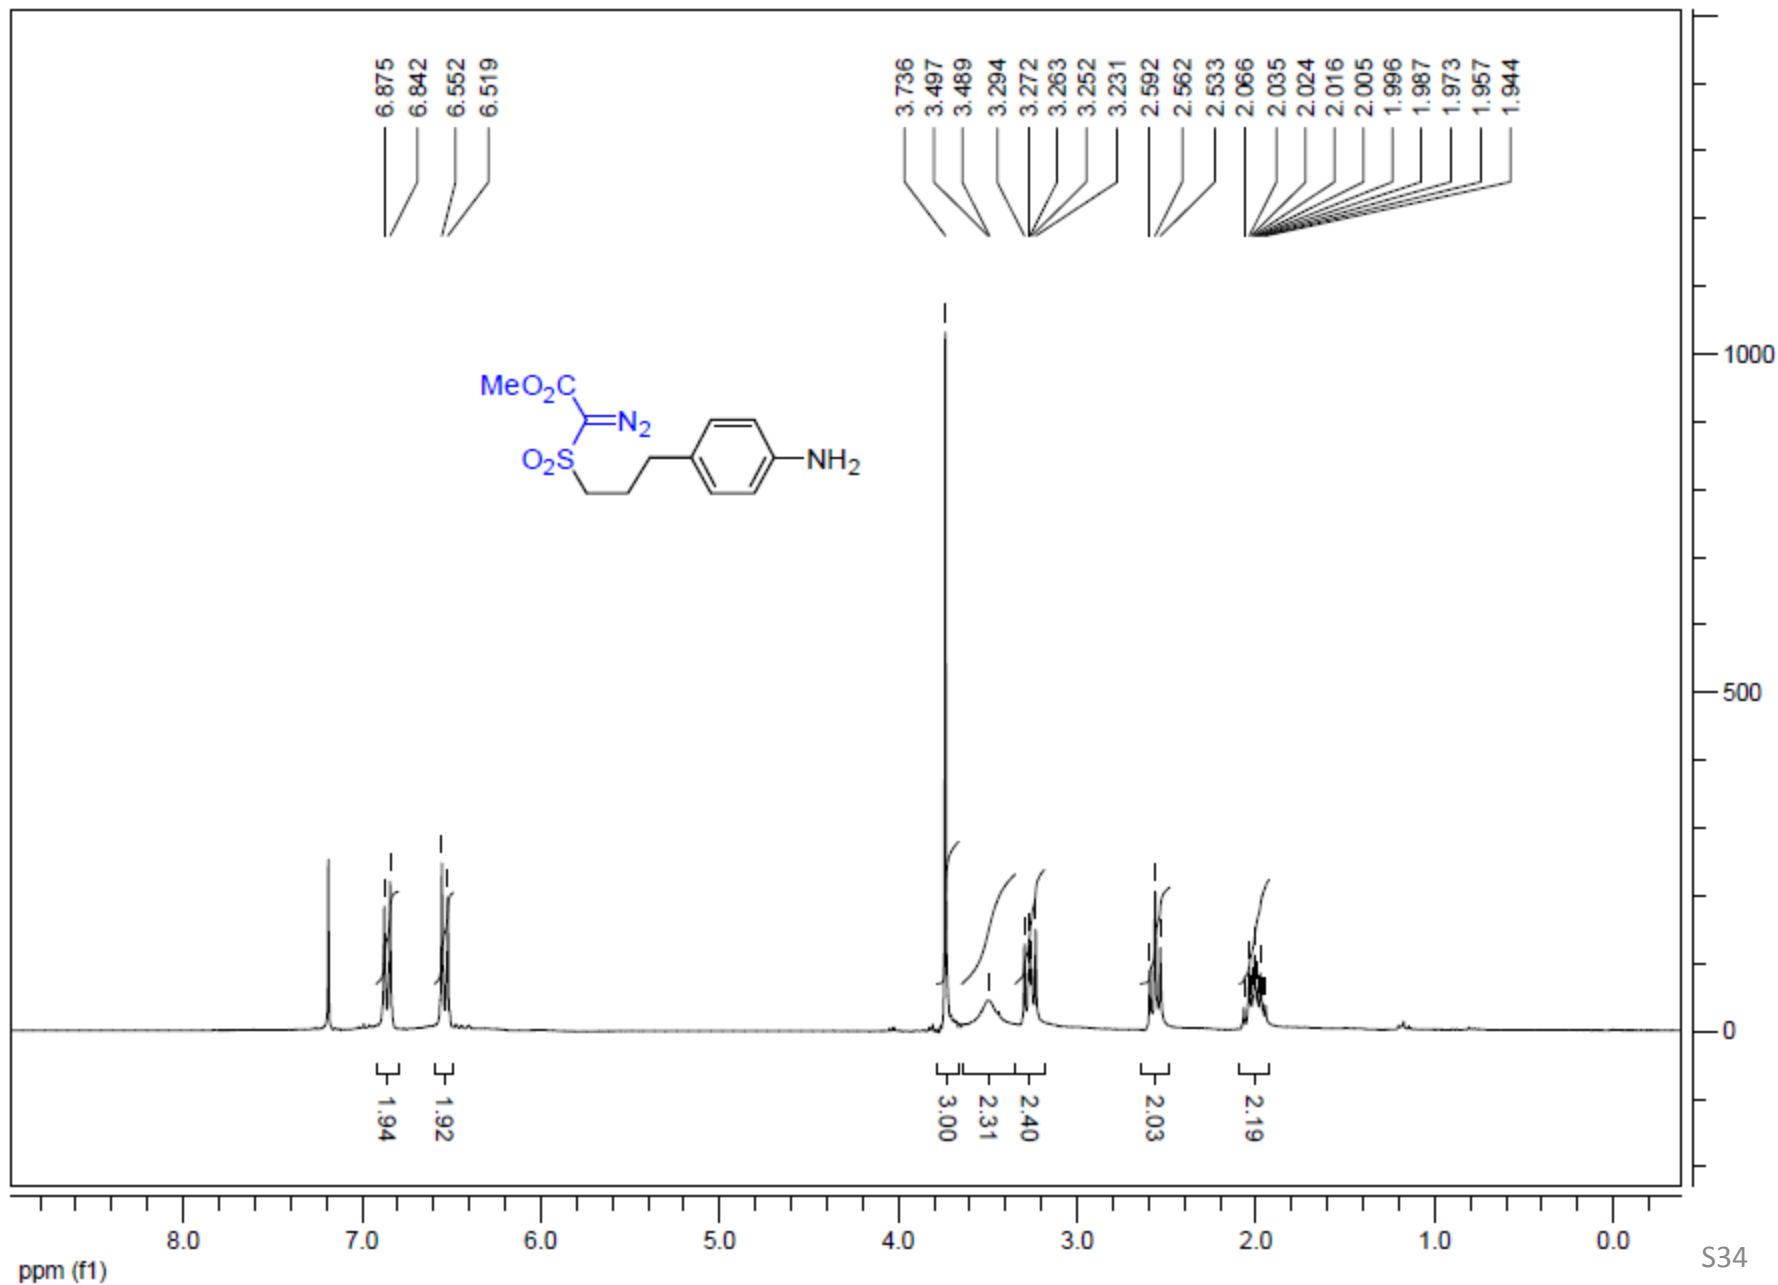

# methyl 2-((3-(4-aminophenyl)propyl)sulfonyl)-2-diazoacetate (**1**)

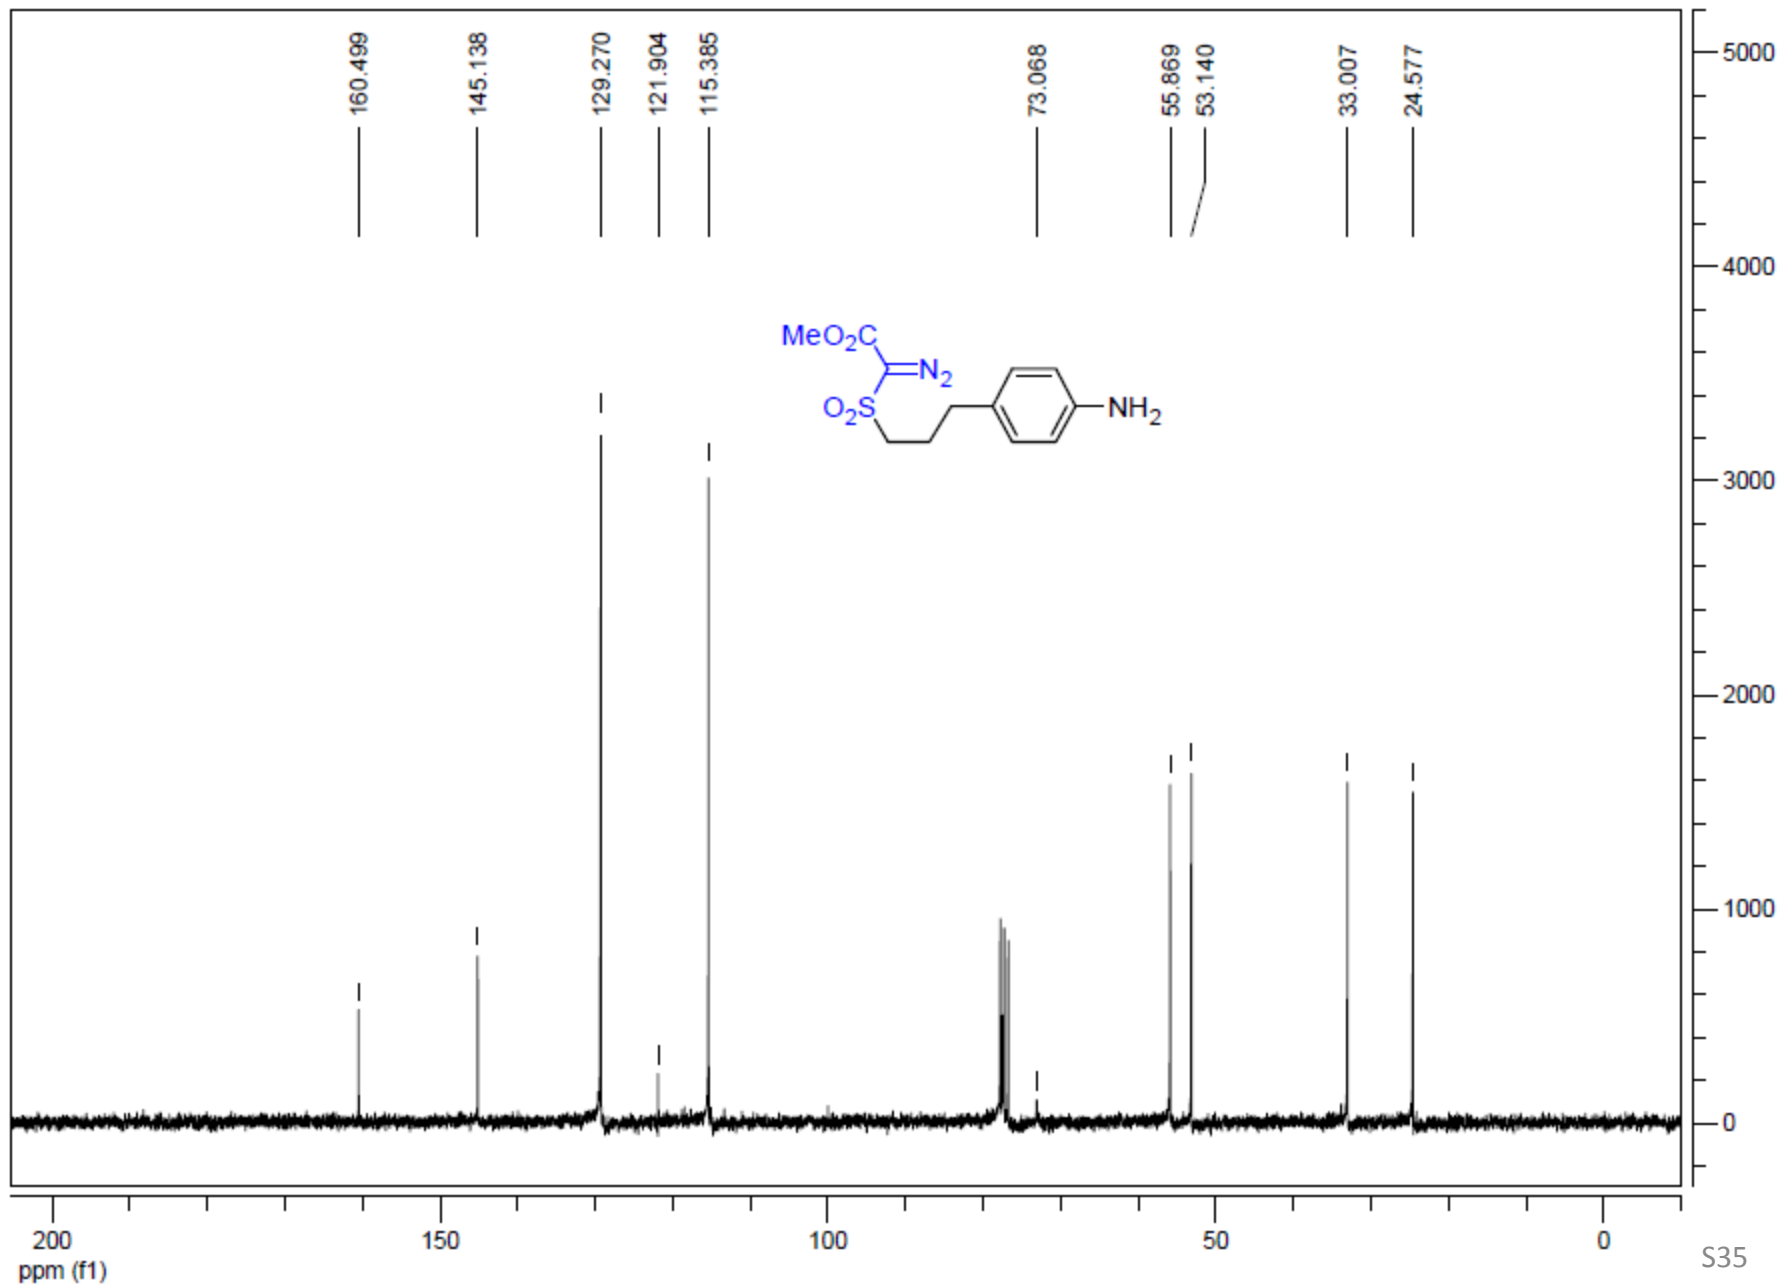



# methyl 2-((3-(4-acetamidophenyl)propyl)sulfonyl)-2-diazoacetate (**1m**)

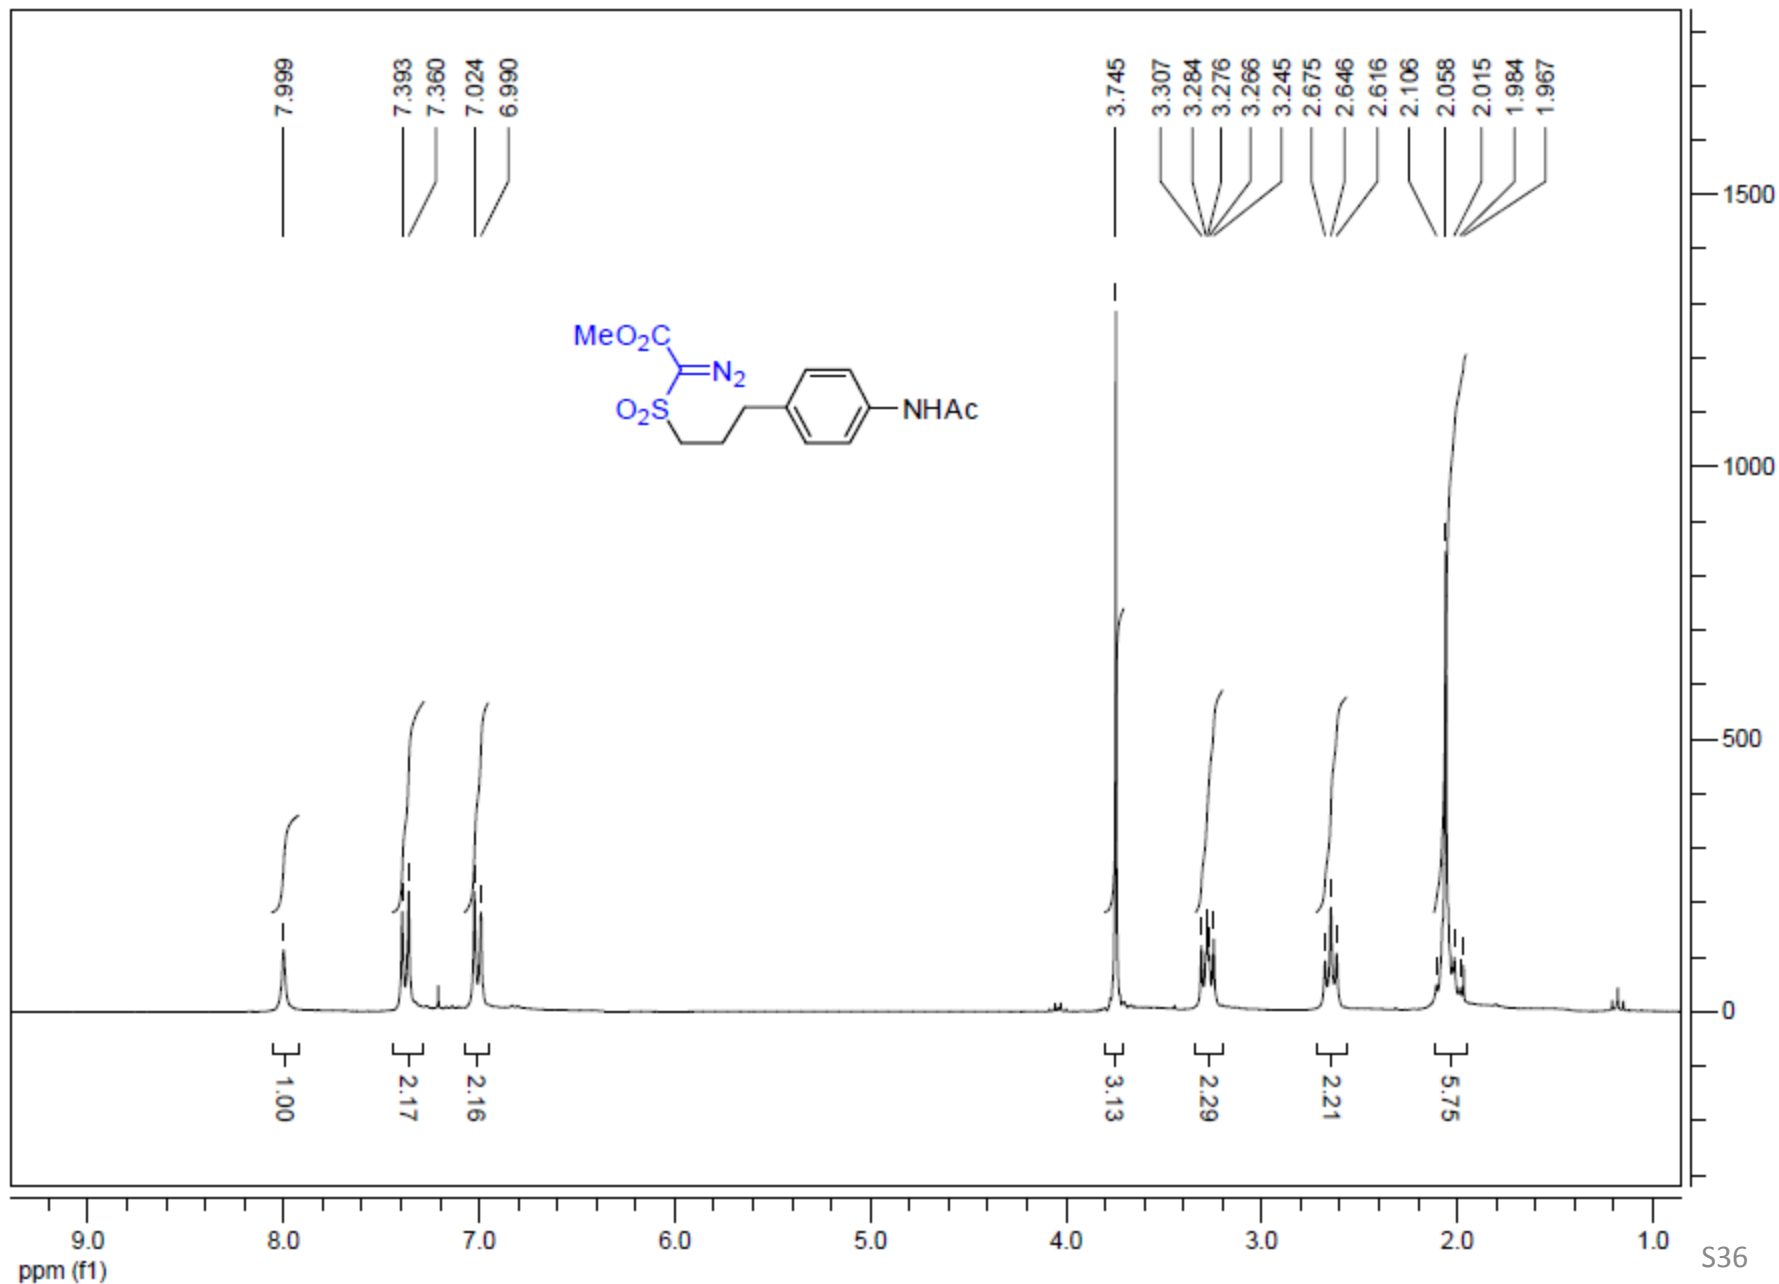

methyl 2-((3-(4-acetamidophenyl)propyl)sulfonyl)-2-diazoacetate (**1m**)

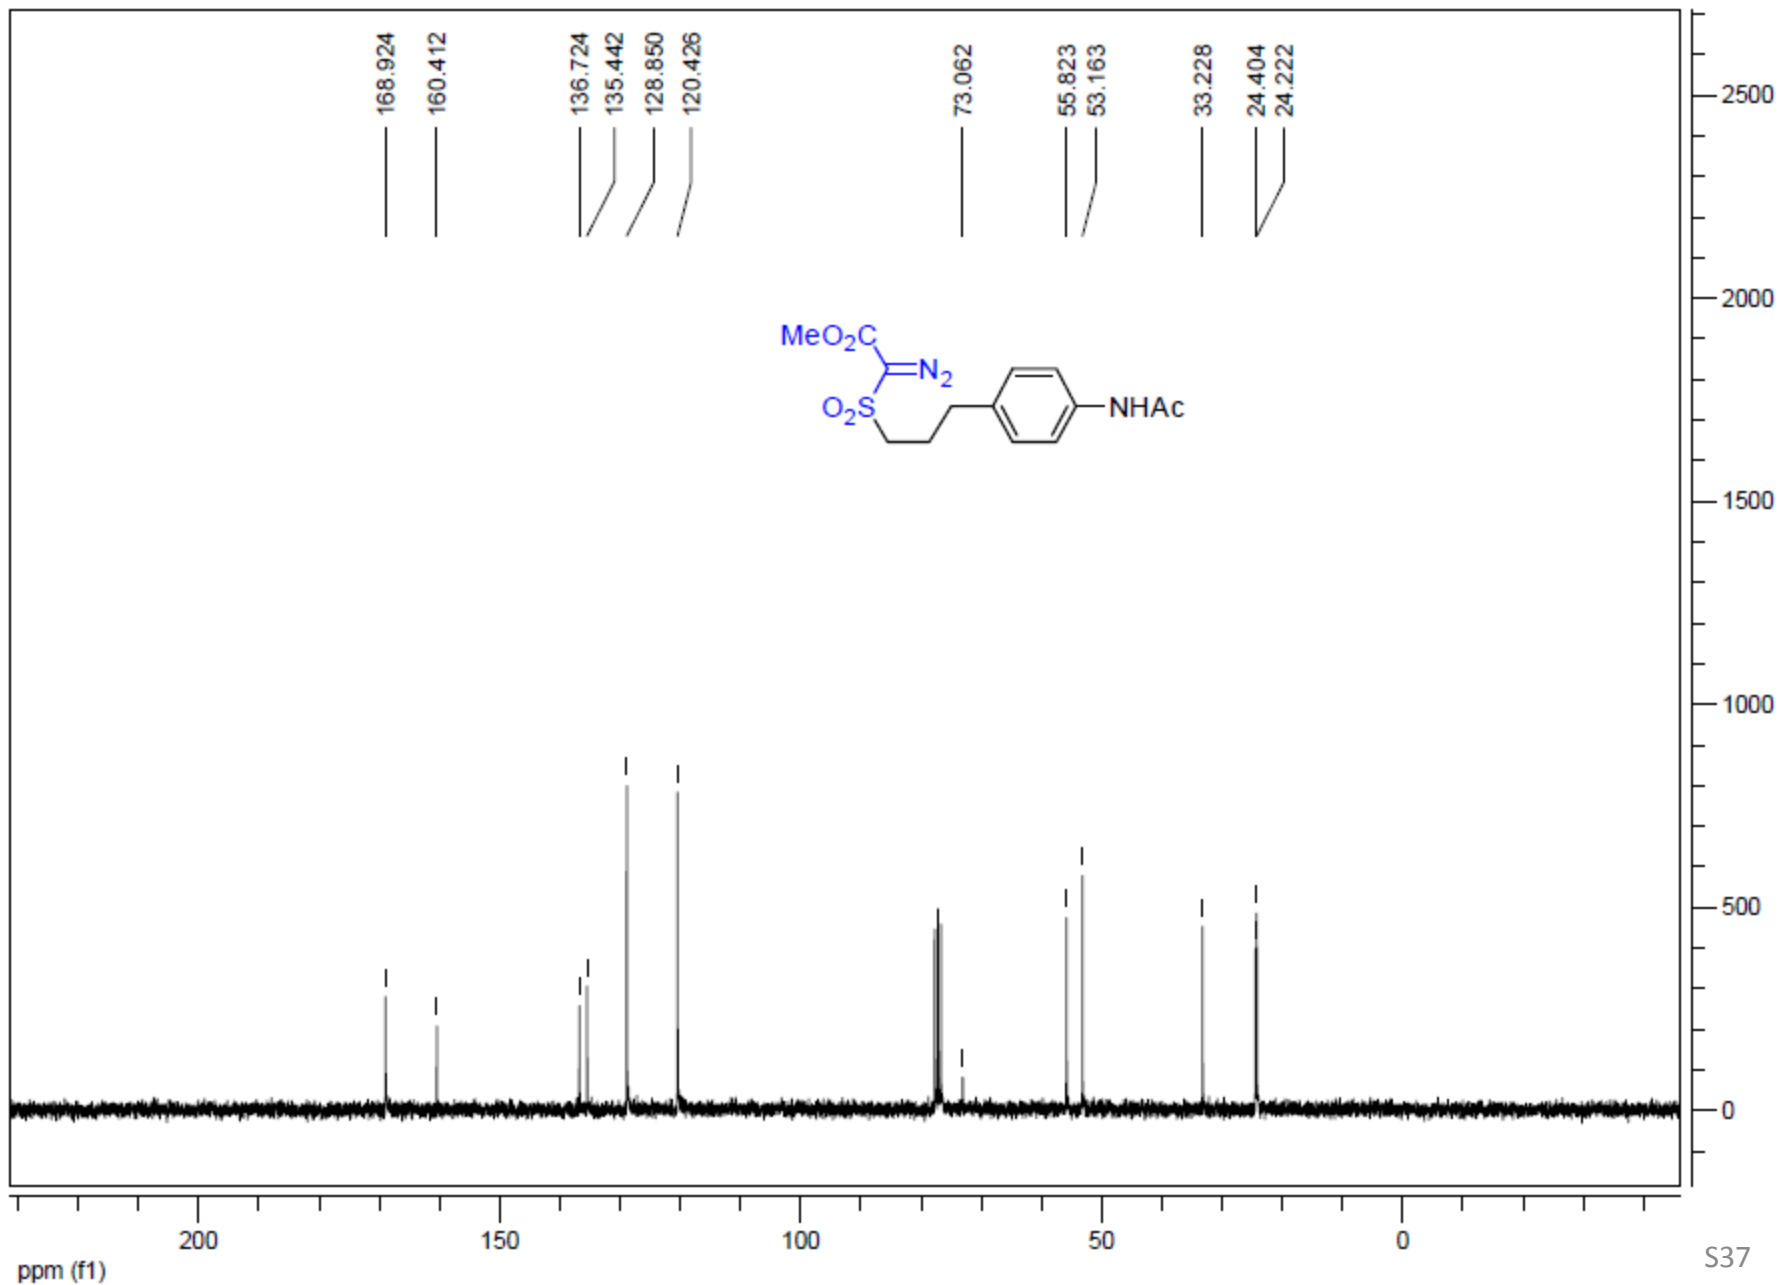

methyl 2-diazo-2-((3-(1-phenyl-1H-1,2,3-triazol-4-yl)propyl)sulfonyl)acetate (**1n**)

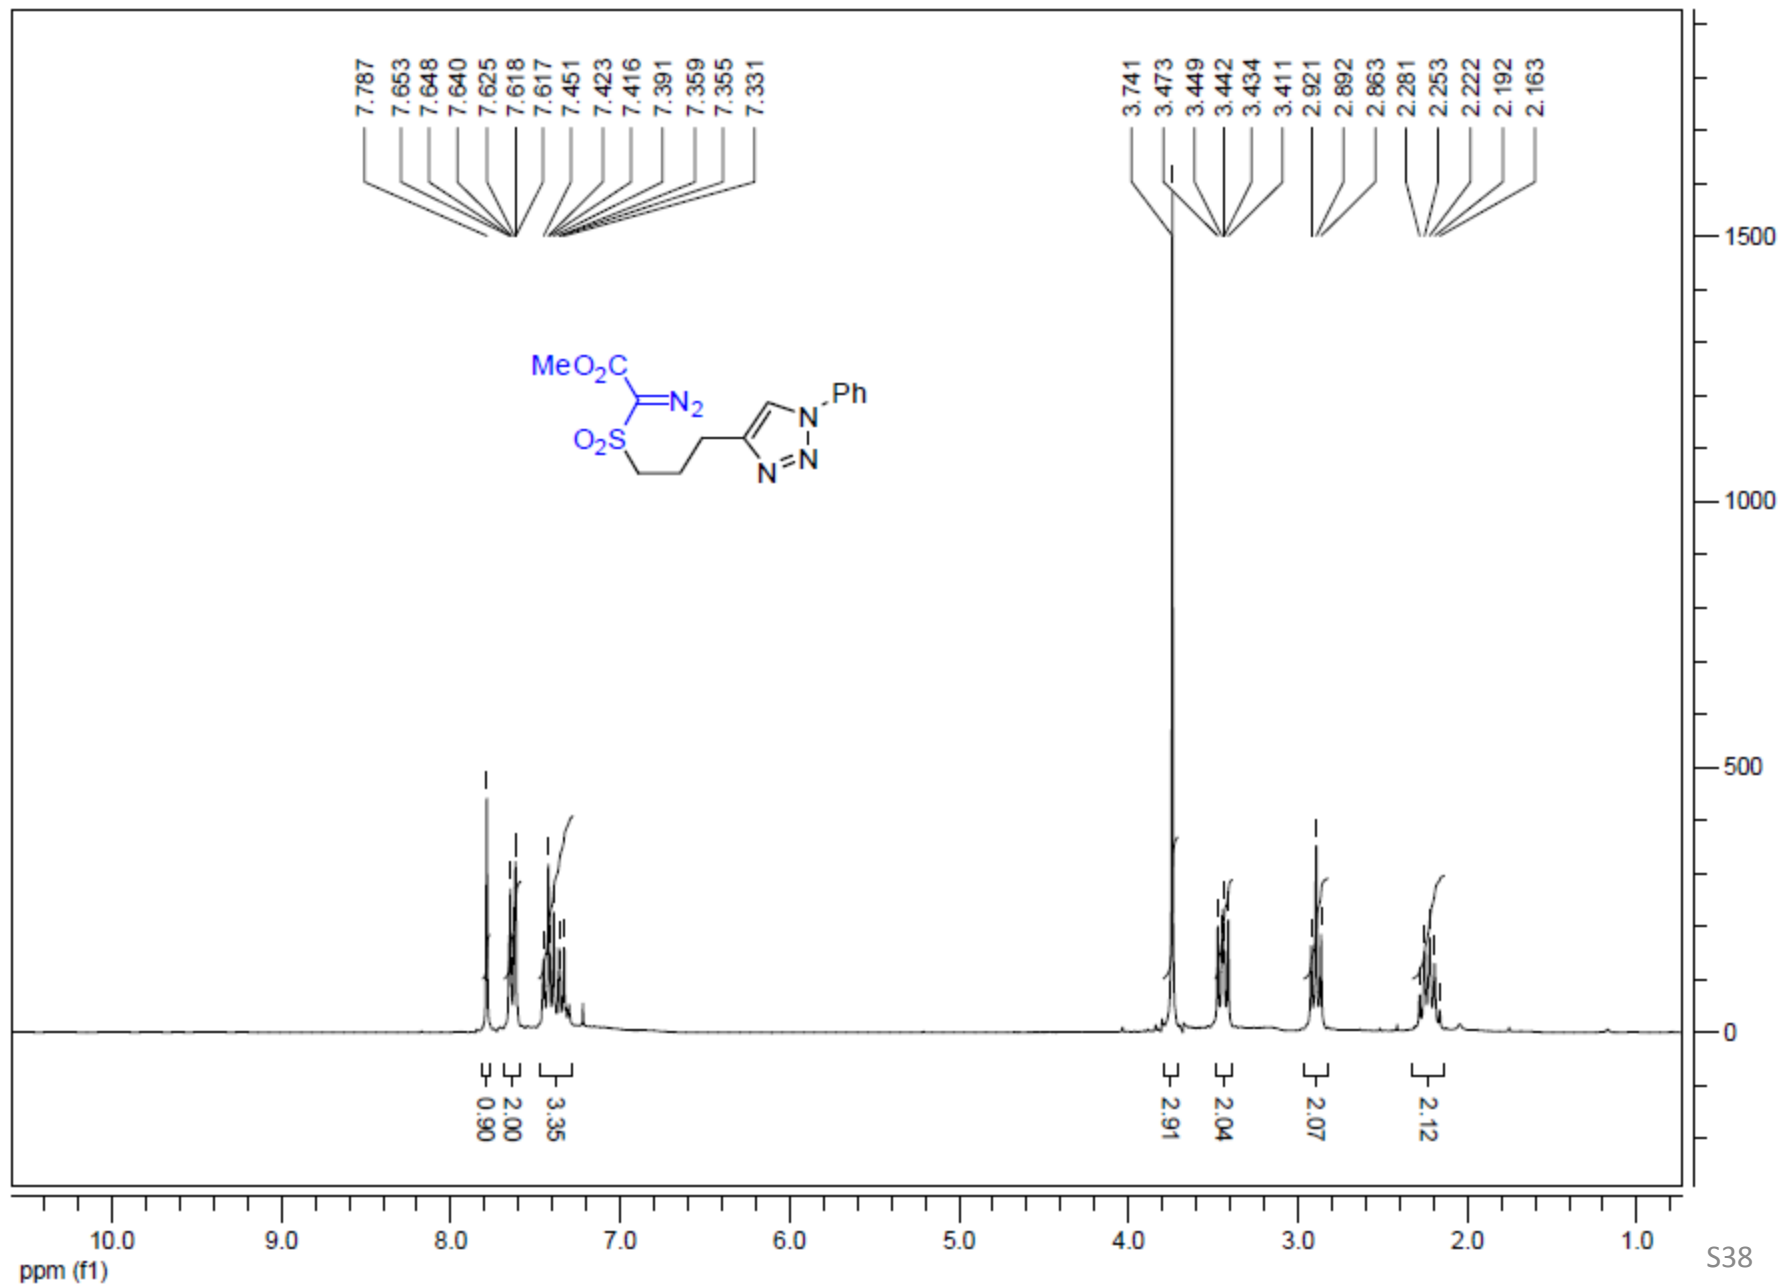

methyl 2-diazo-2-((3-(1-phenyl-1H-1,2,3-triazol-4-yl)propyl)sulfonyl)acetate (**1n**)

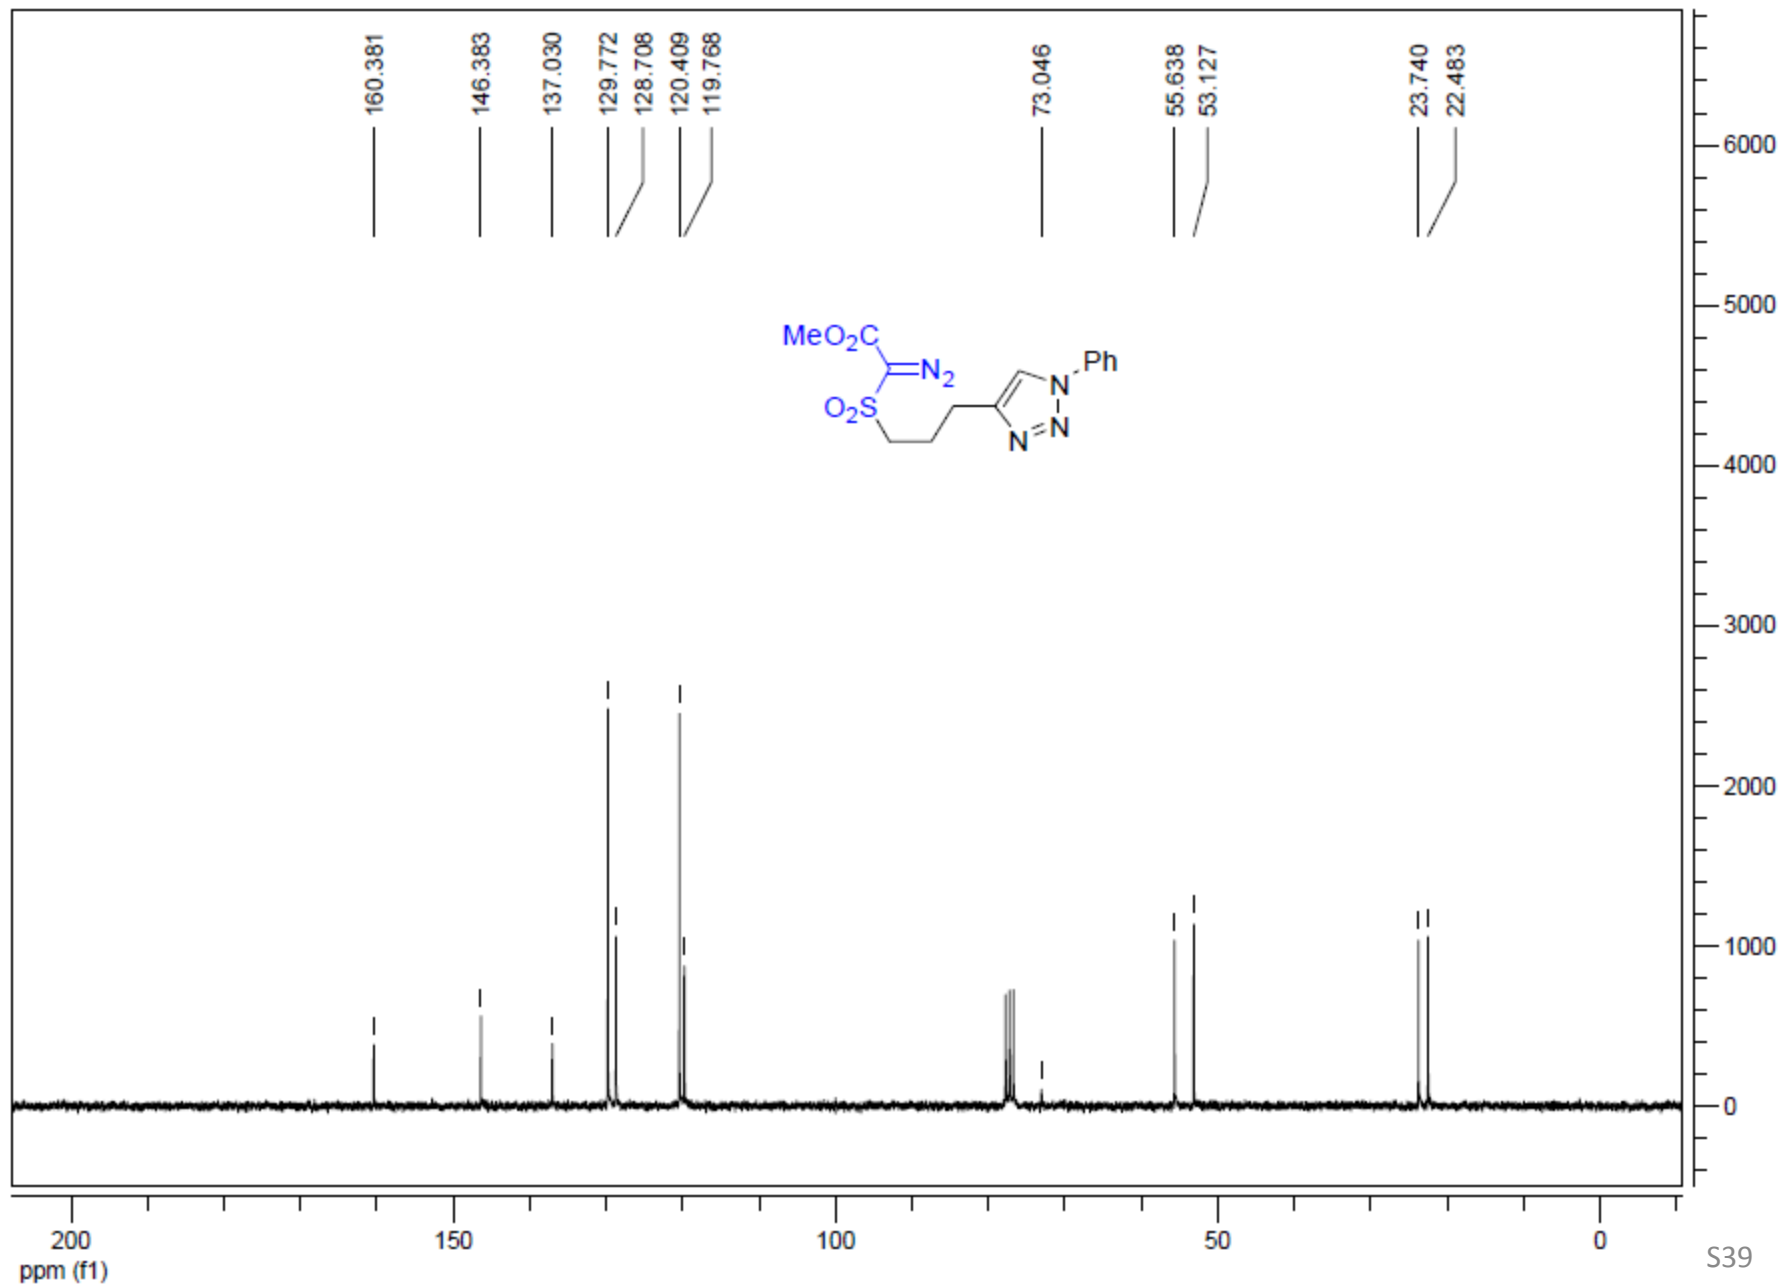

# methyl 2-diazo-2-(pent-4-en-1-ylsulfonyl)acetate (**1o**)

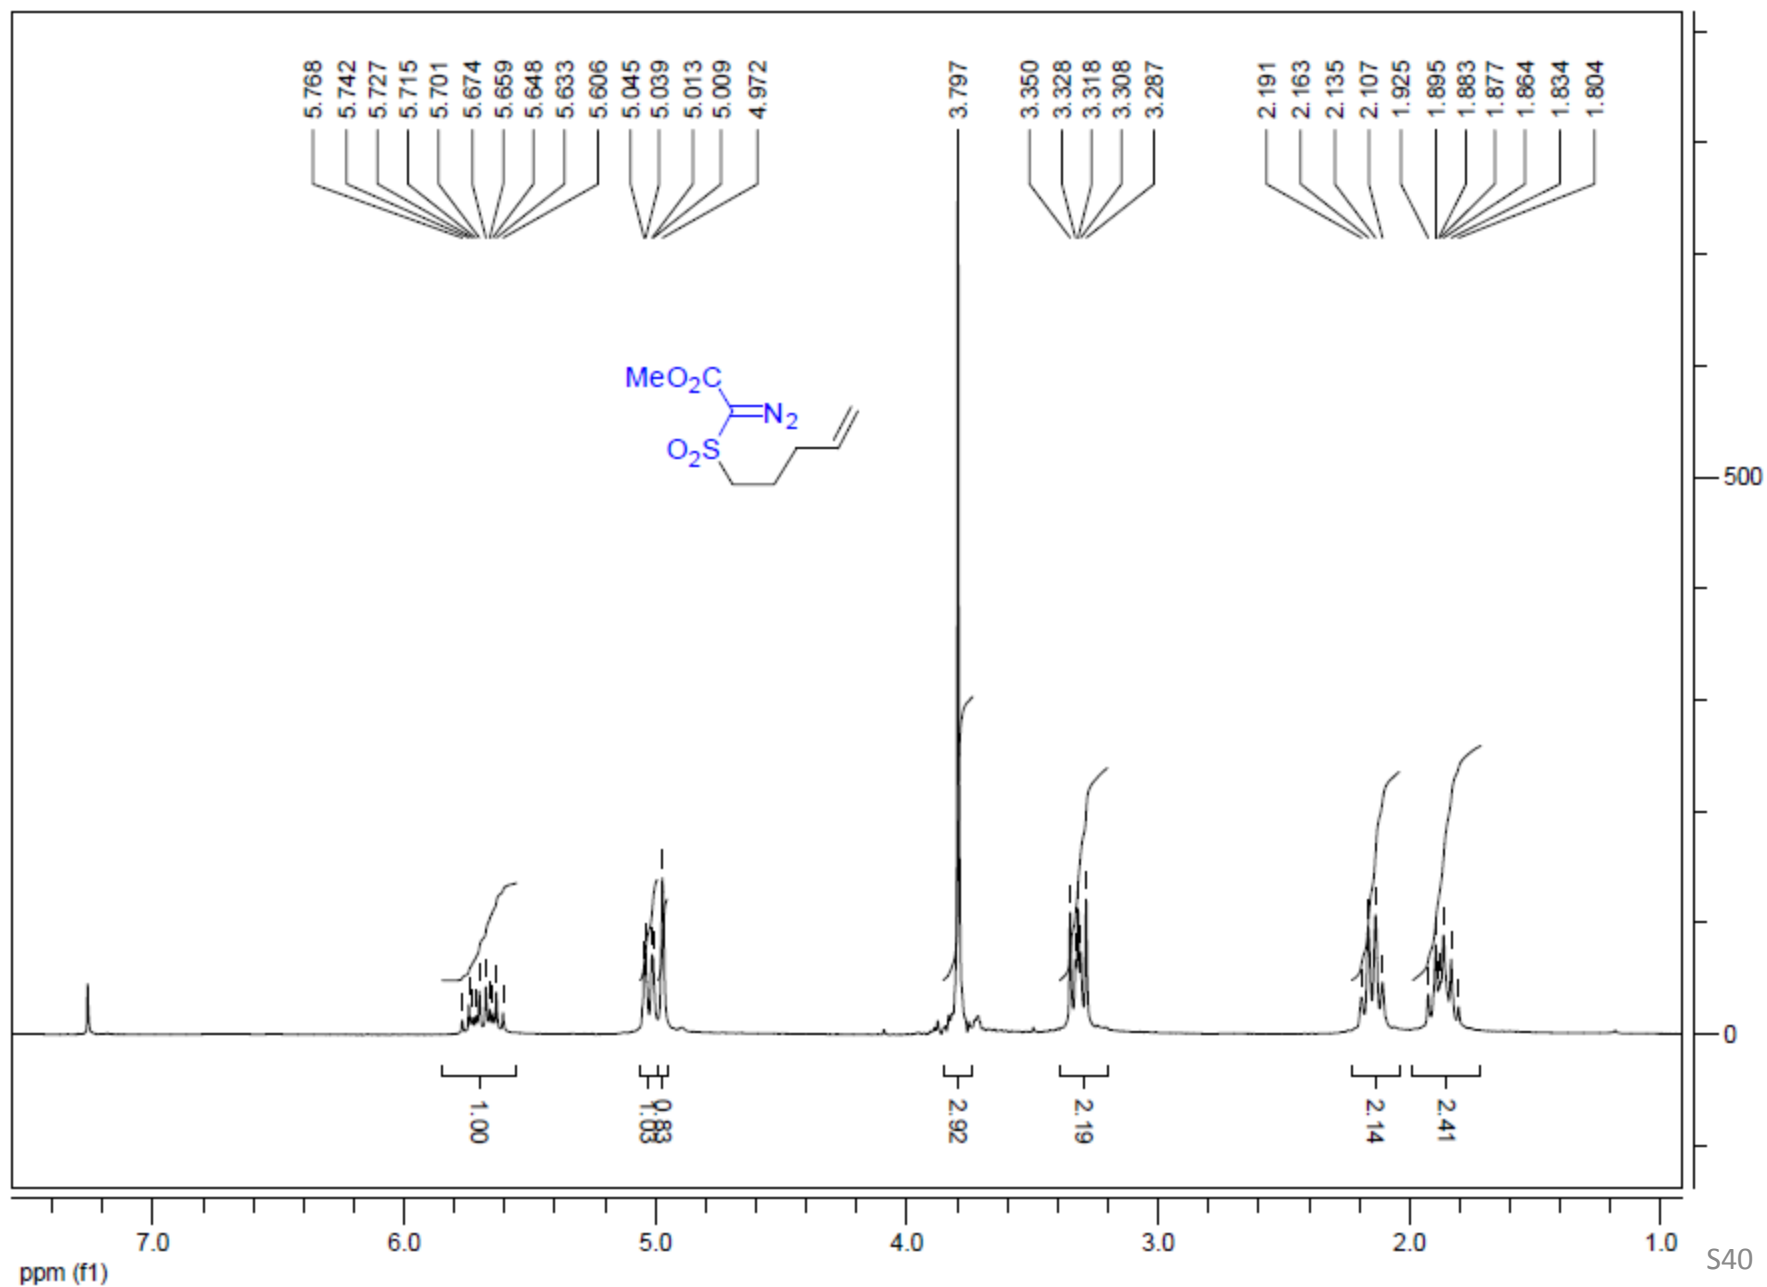

methyl 2-diazo-2-(pent-4-en-1-ylsulfonyl)acetate (**1o**)

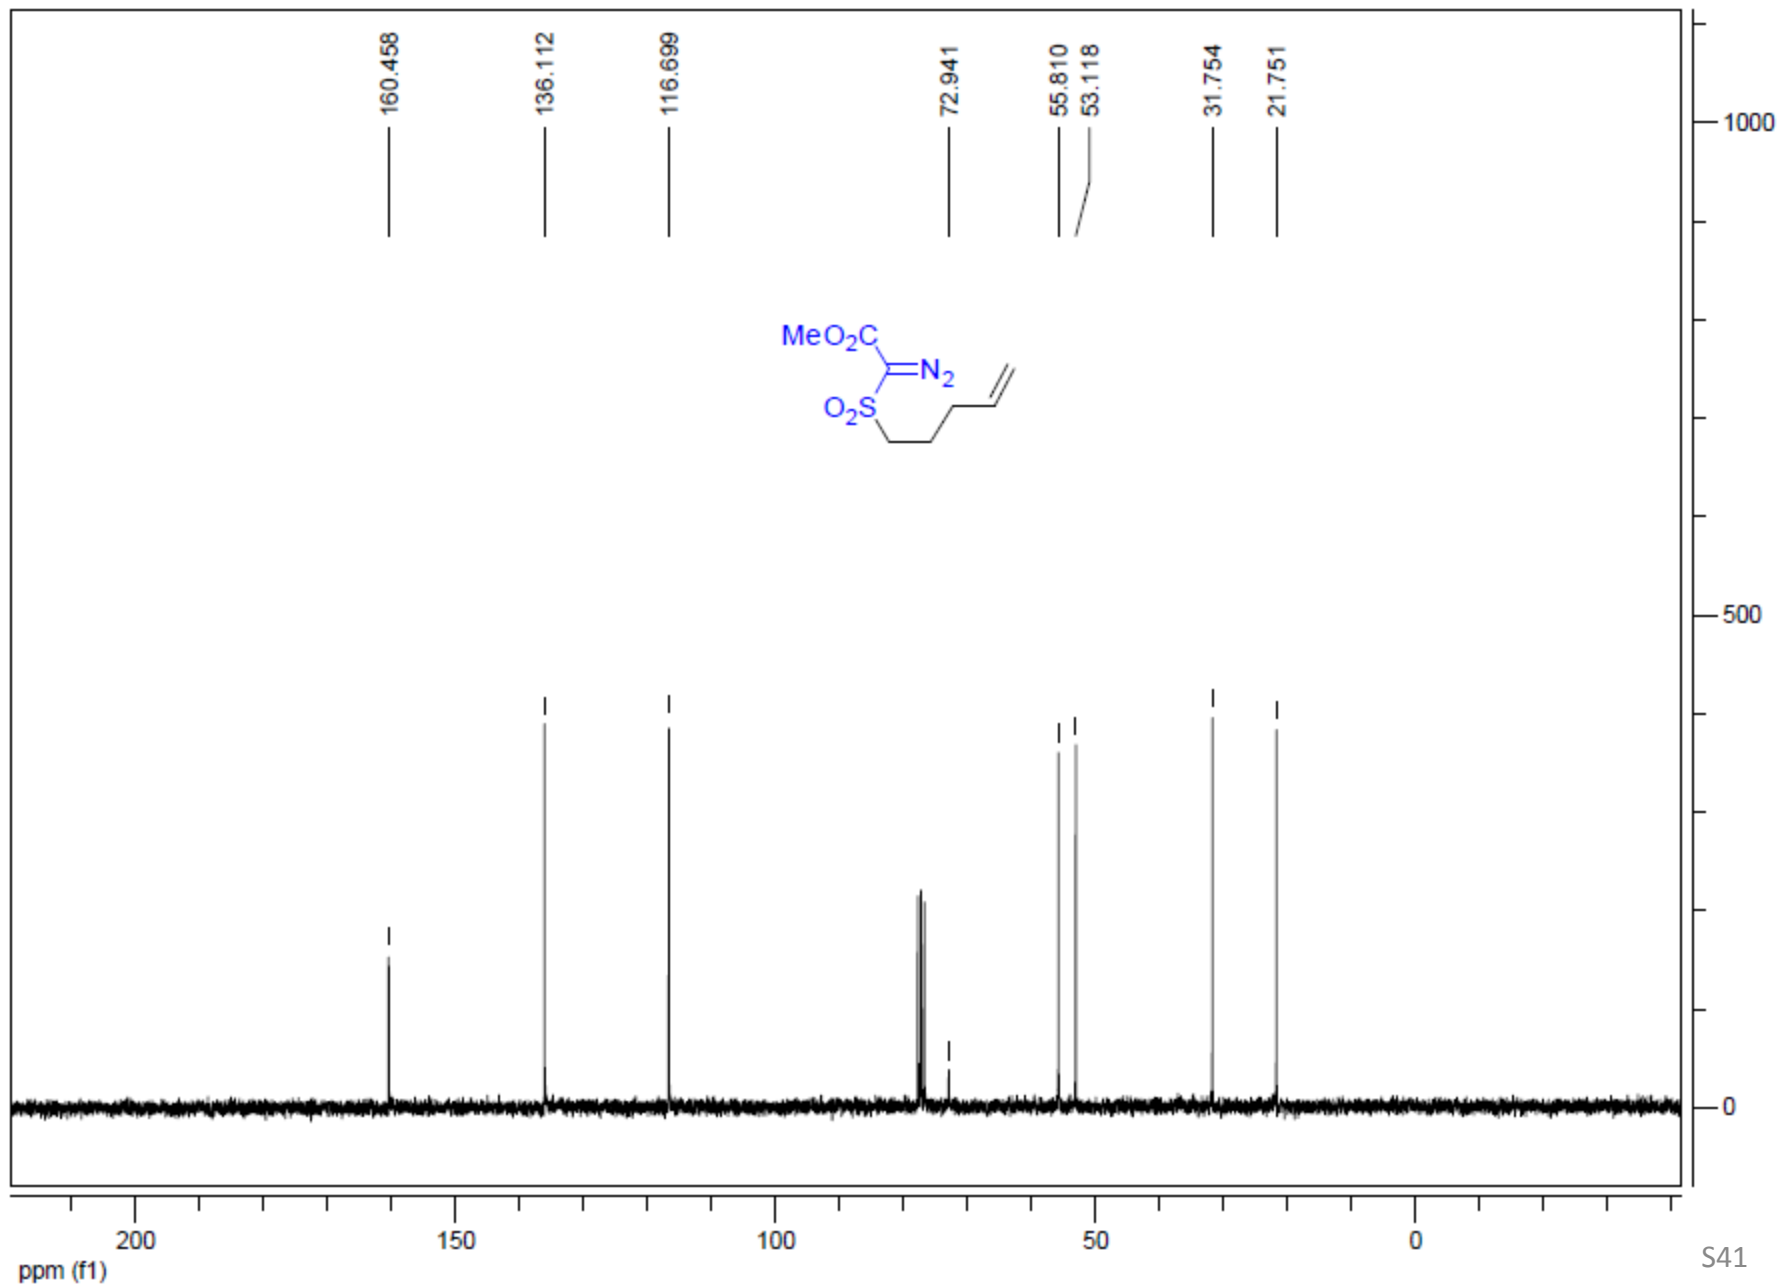

methyl 2-diazo-2-((4-methylpent-4-en-1-yl)sulfonyl)acetate (**1p**)

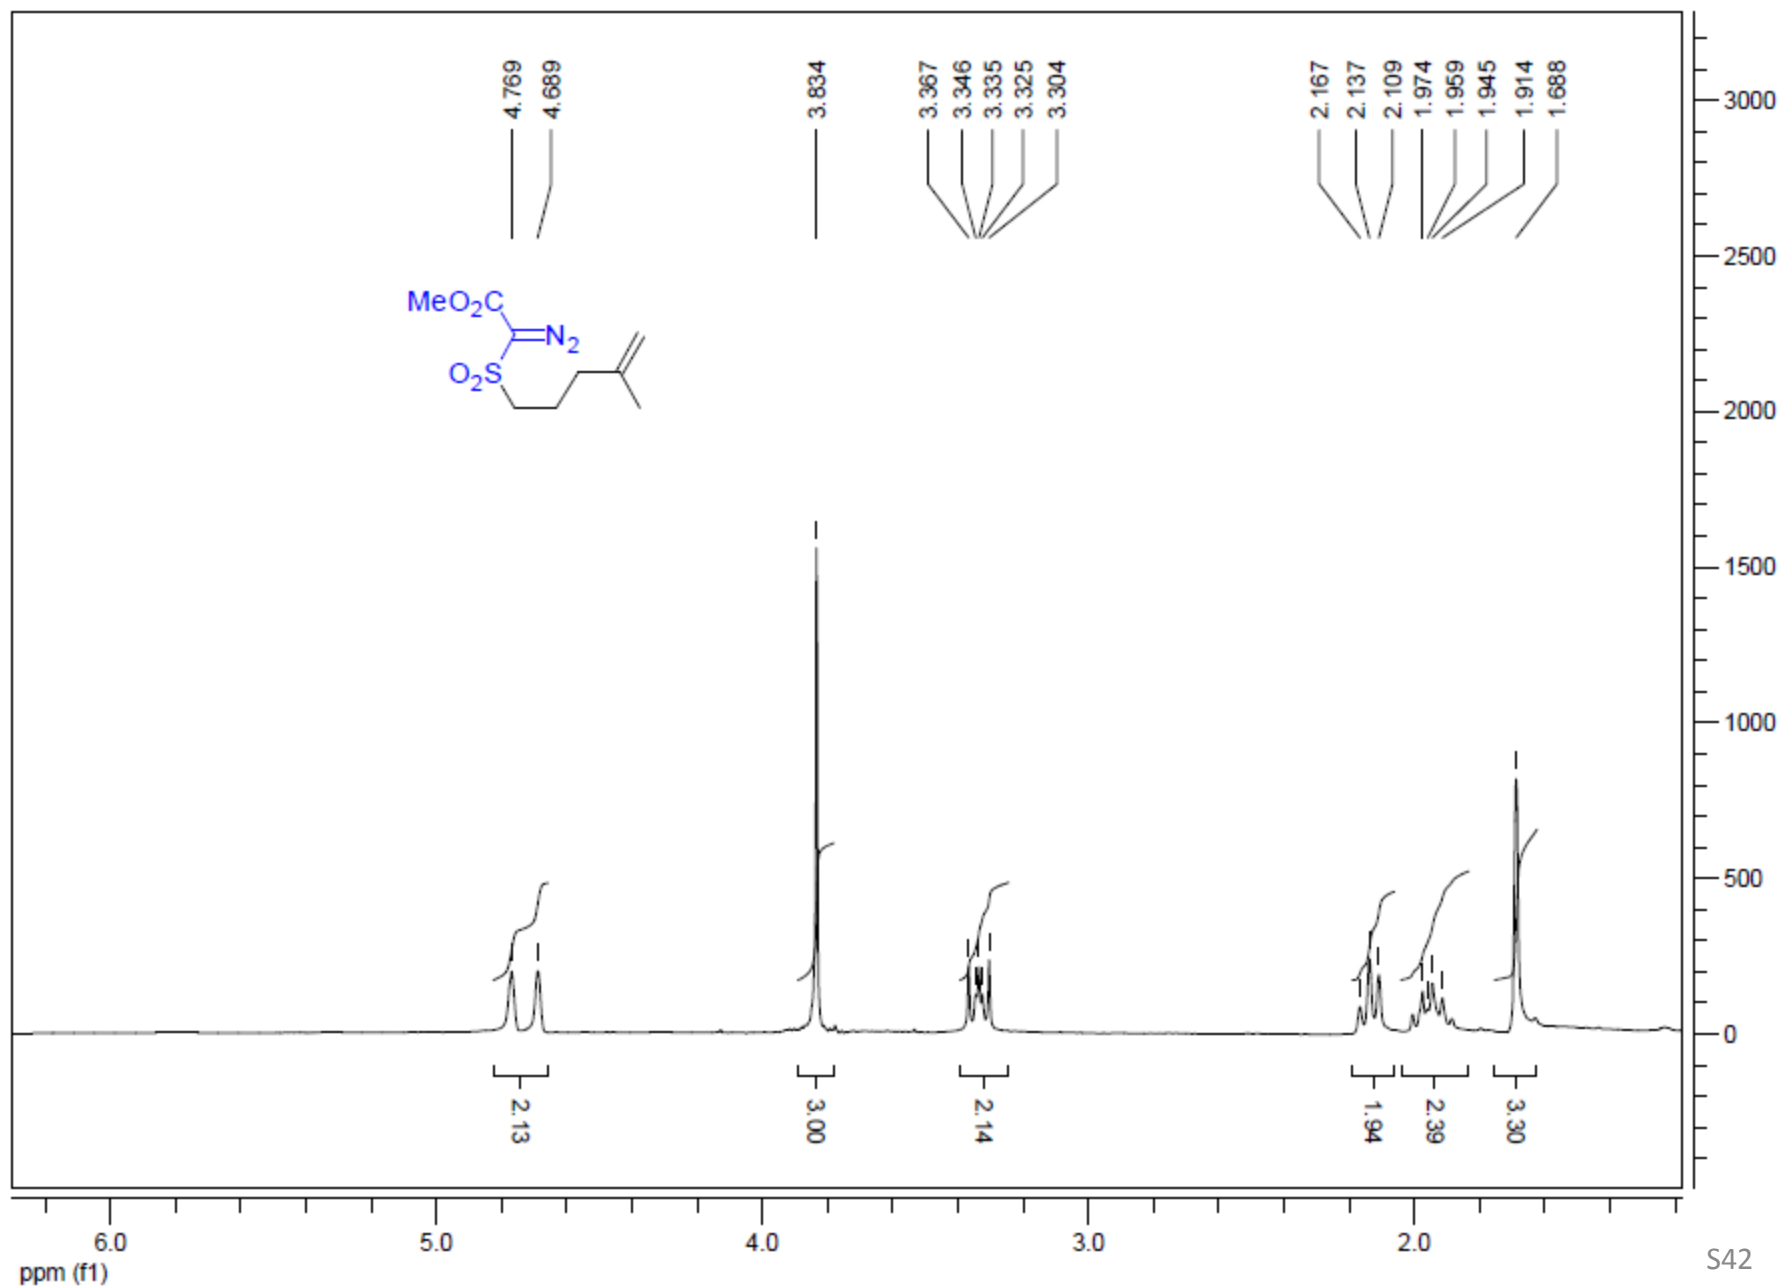

methyl 2-diazo-2-((4-methylpent-4-en-1-yl)sulfonyl)acetate (**1p**)

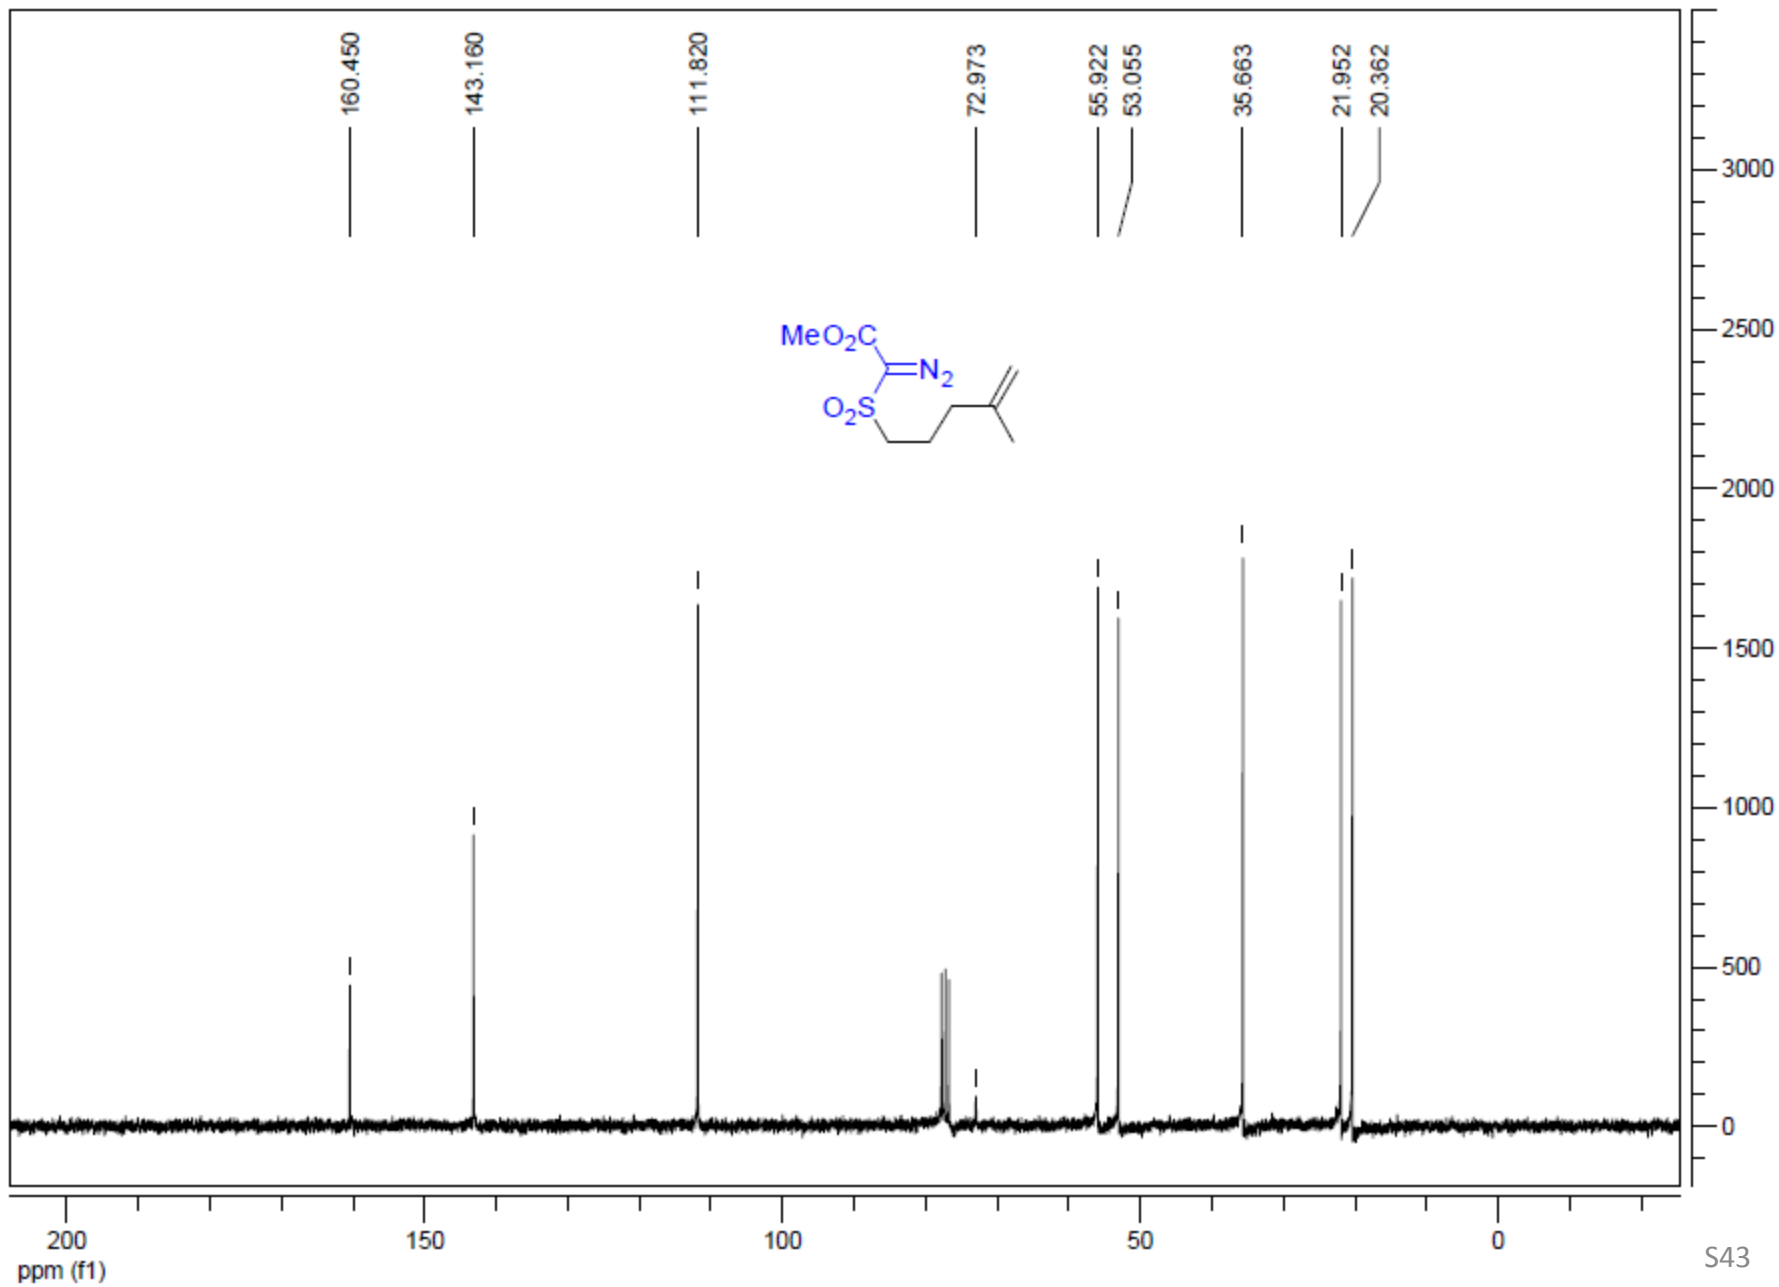



methyl 2-diazo-2-(hexa-4,5-dien-1-ylsulfonyl)acetate (**1q**)

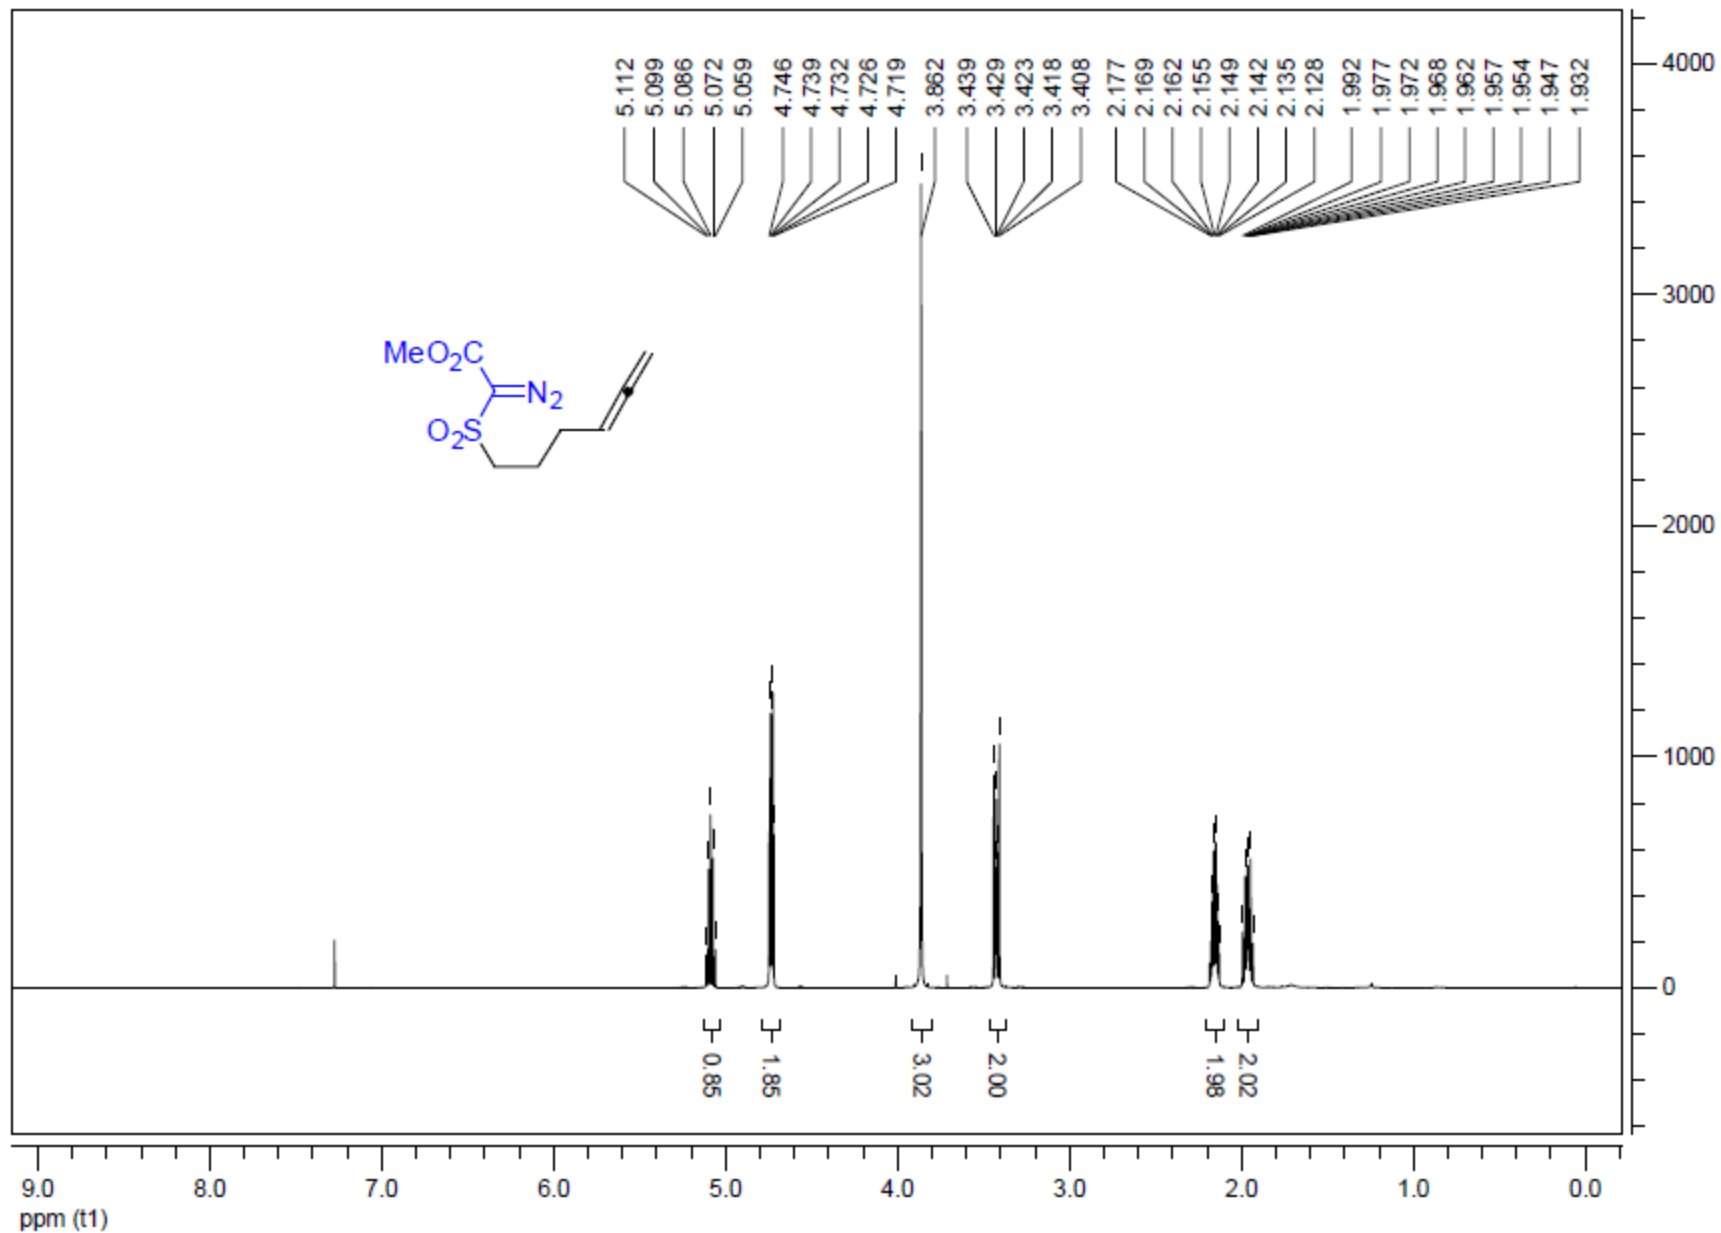

methyl 2-diazo-2-(hexa-4,5-dien-1-ylsulfonyl)acetate (**1q**)

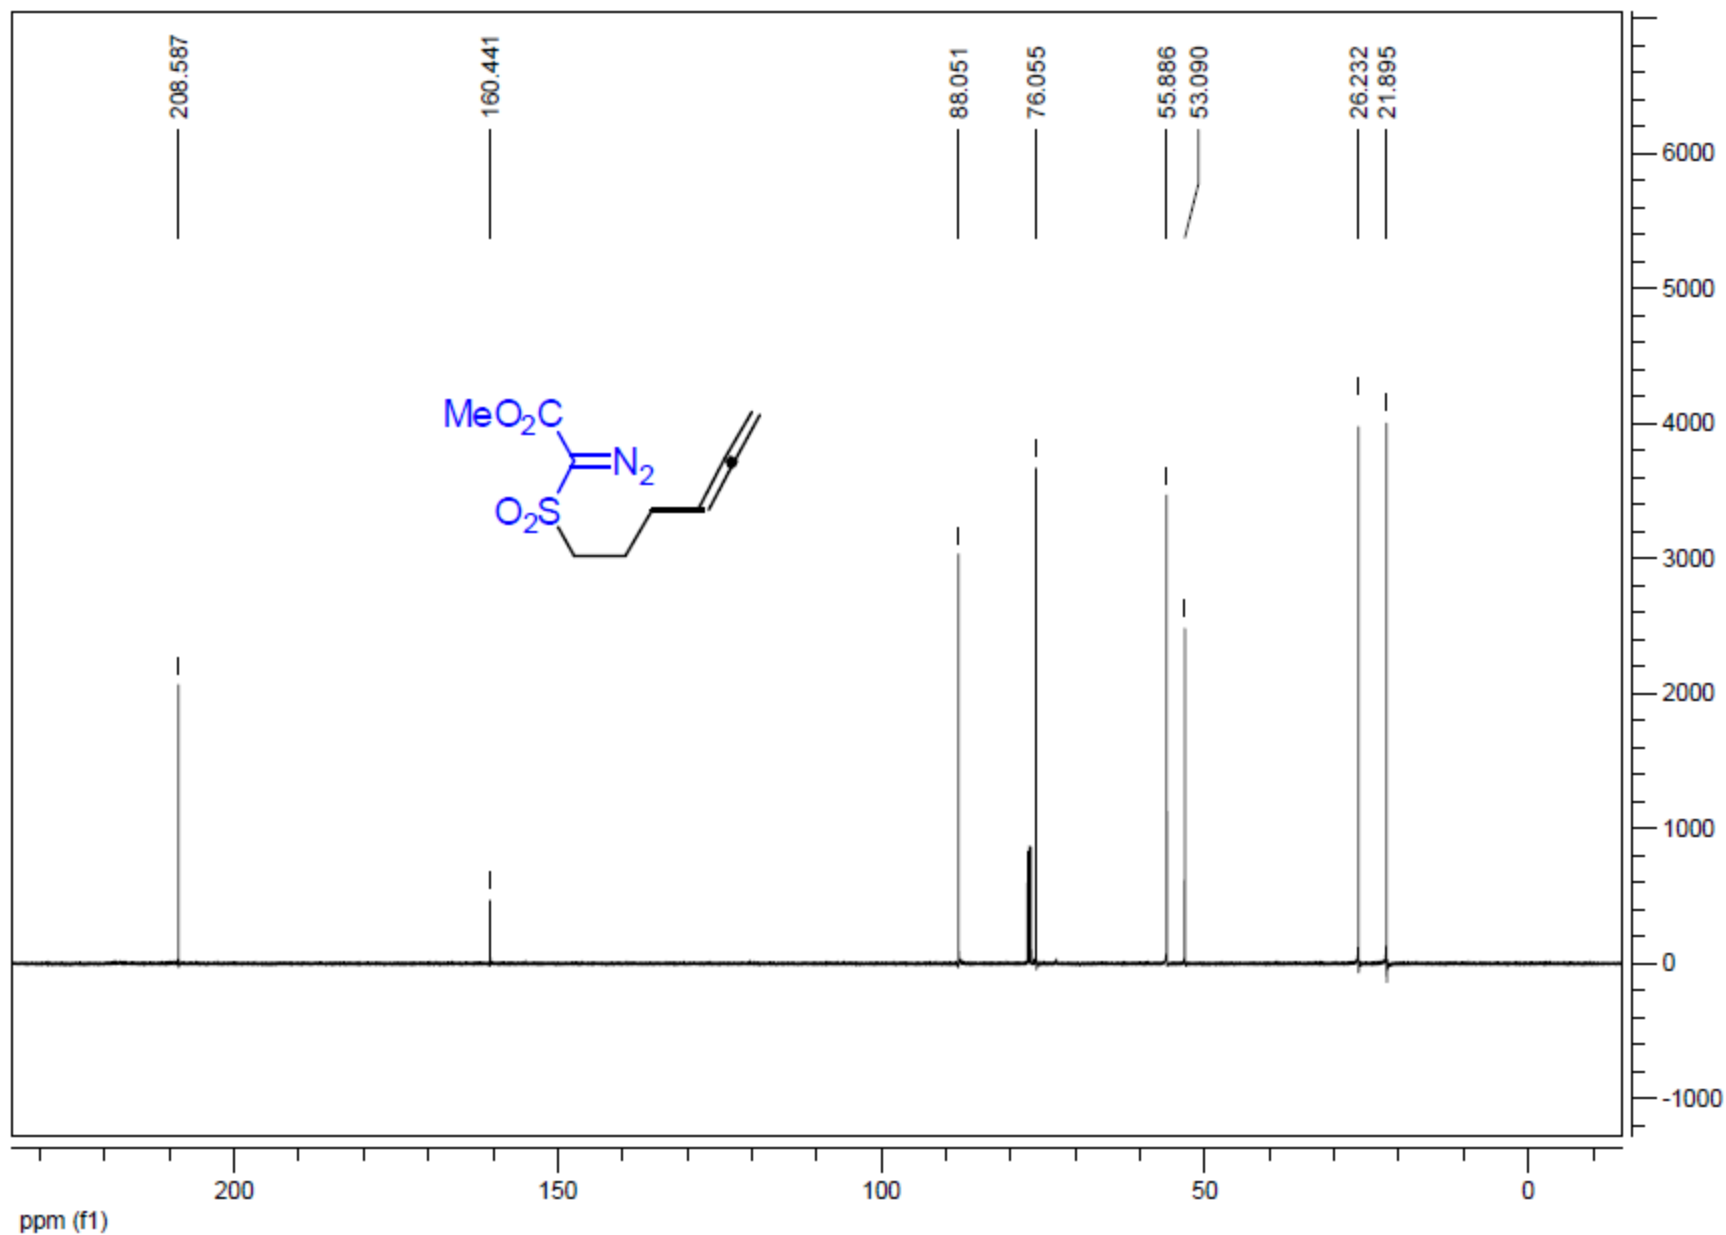

(E)-methyl 2-diazo-2-(hex-4-en-1-ylsulfonyl)acetate (**1r**)

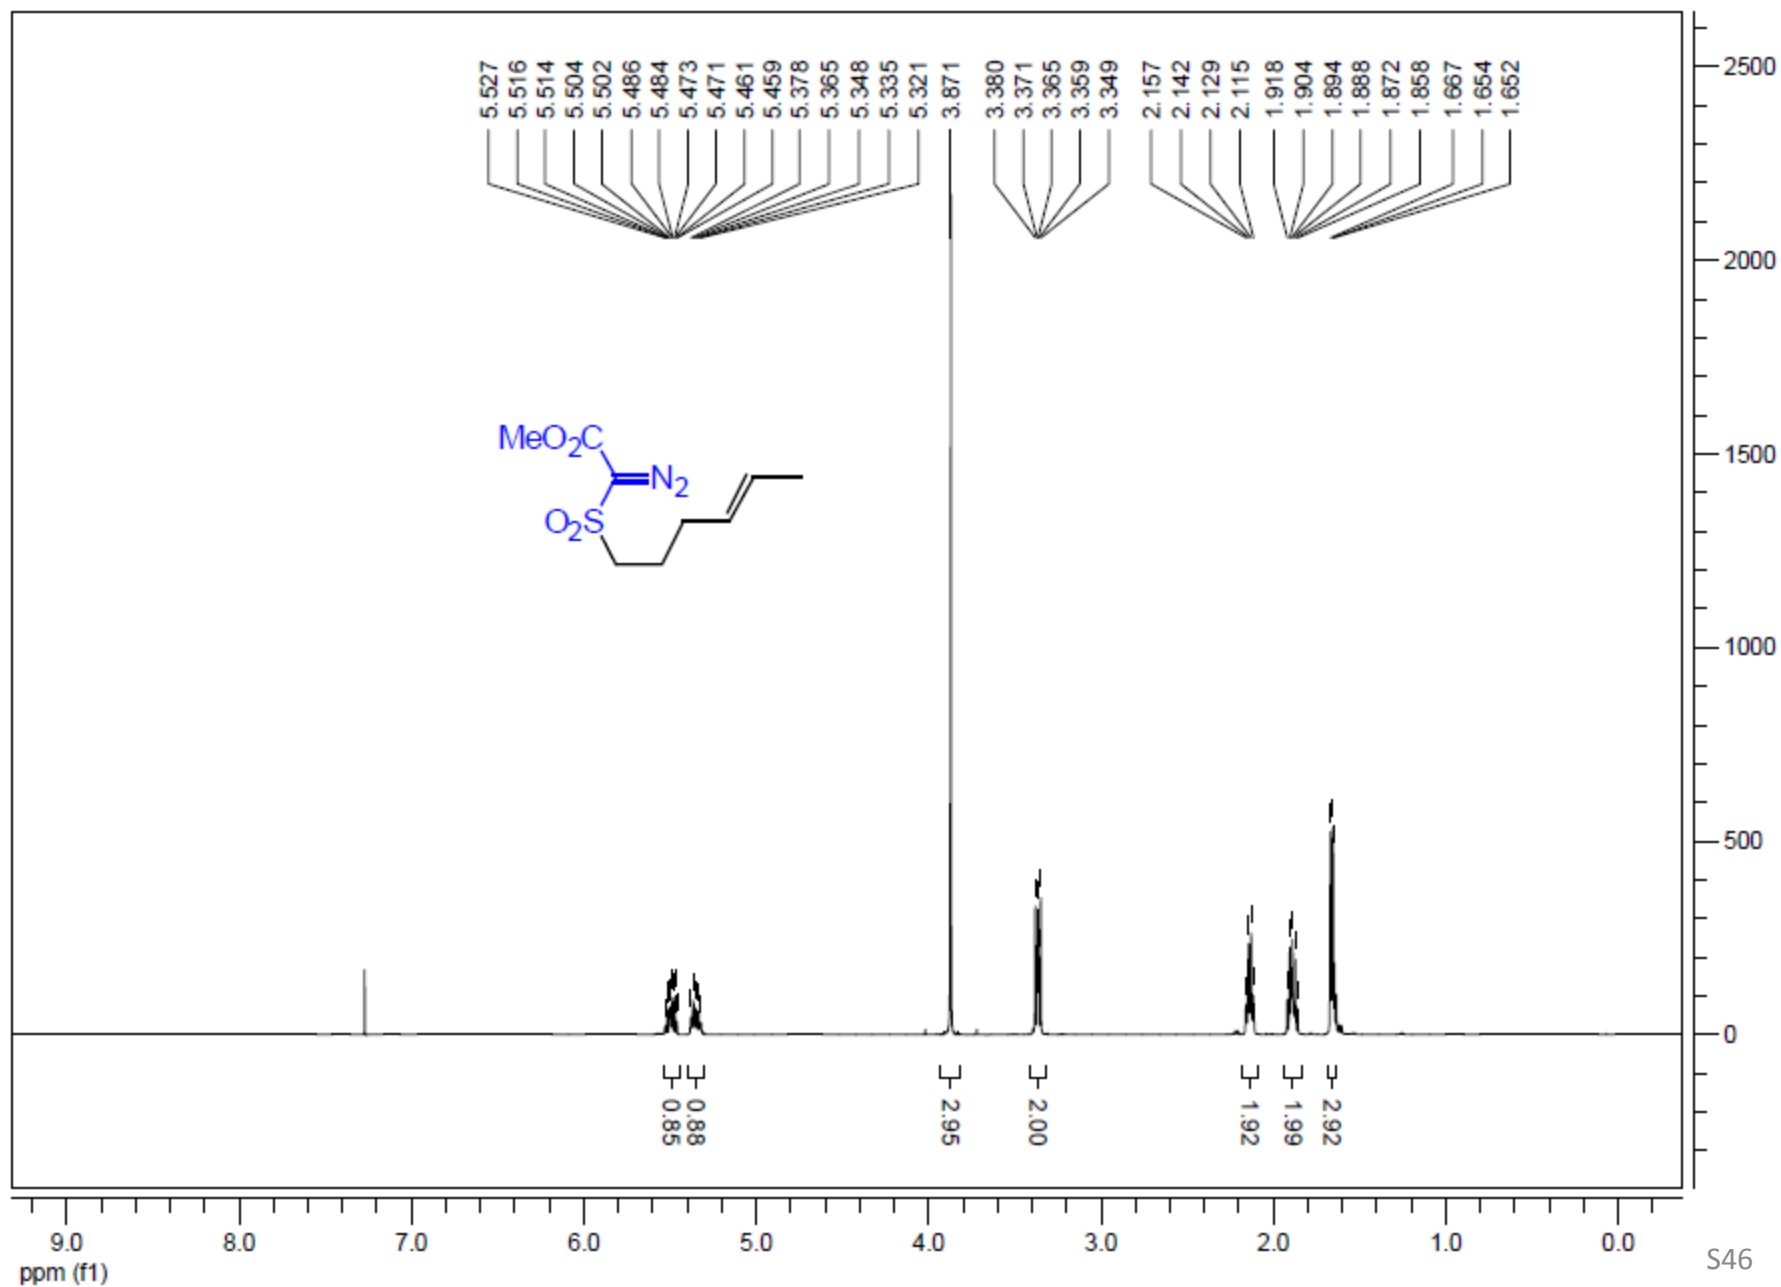

(E)-methyl 2-diazo-2-(hex-4-en-1-ylsulfonyl)acetate (**1r**)

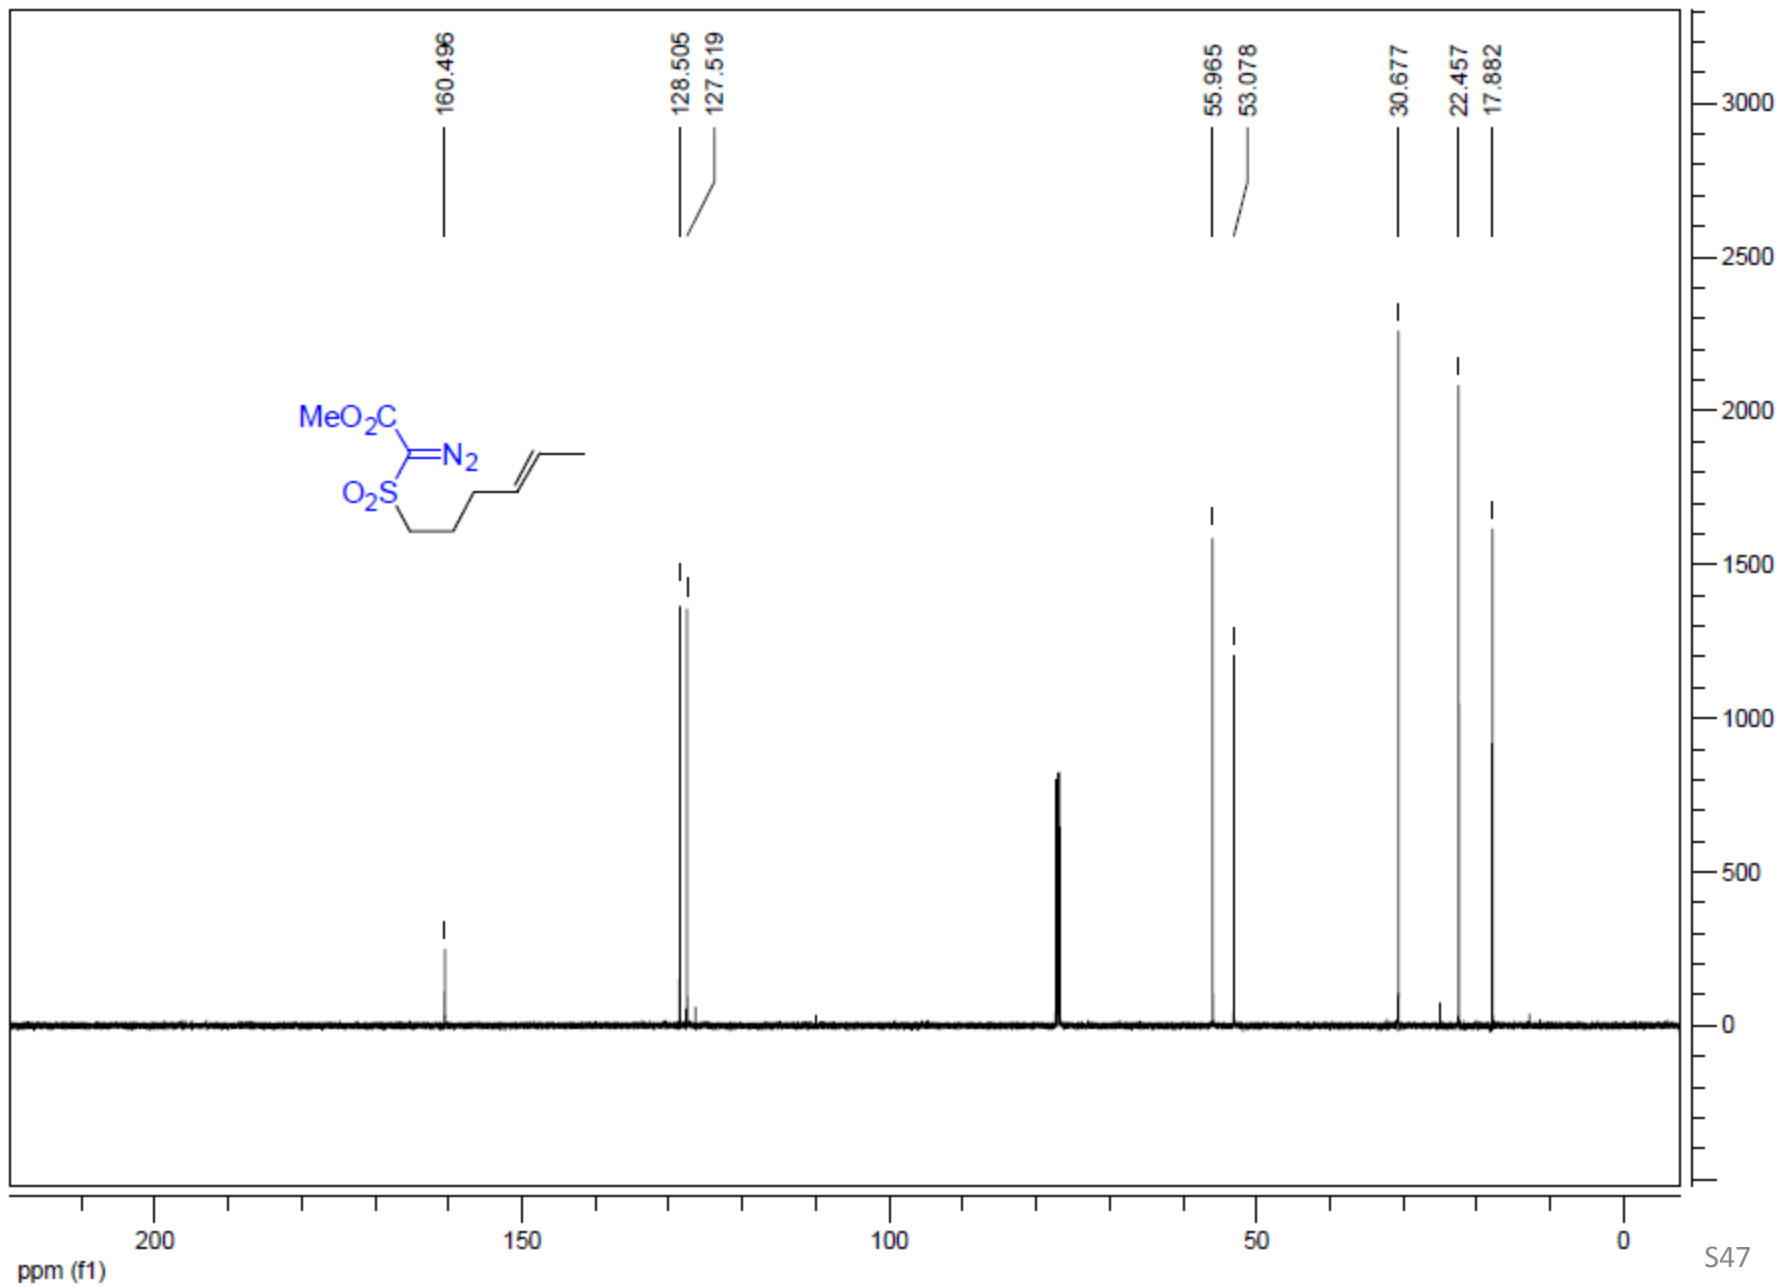

# (Z)-methyl 2-diazo-2-(hex-4-en-1-ylsulfonyl)acetate (**1s**)

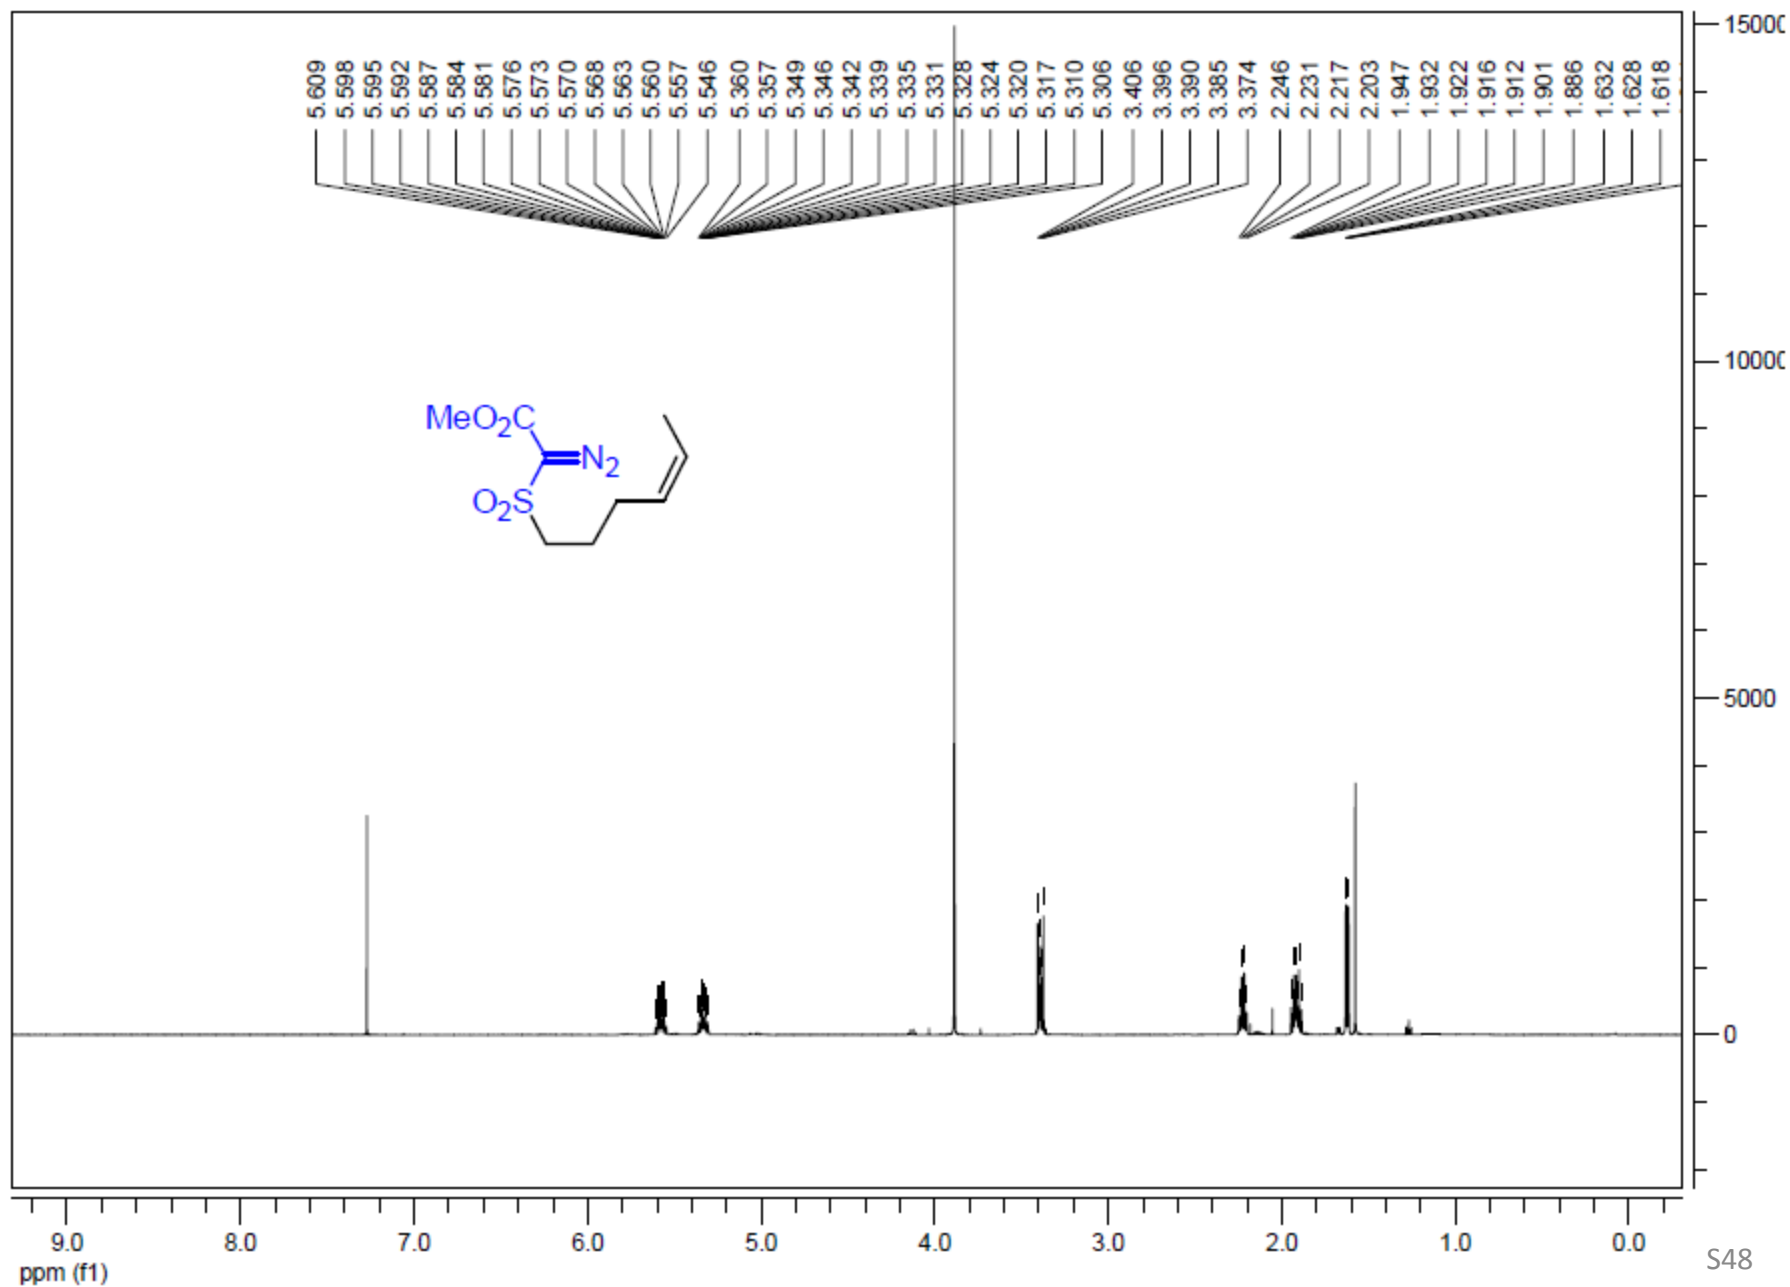

(Z)-methyl 2-diazo-2-(hex-4-en-1-ylsulfonyl)acetate (**1s**)

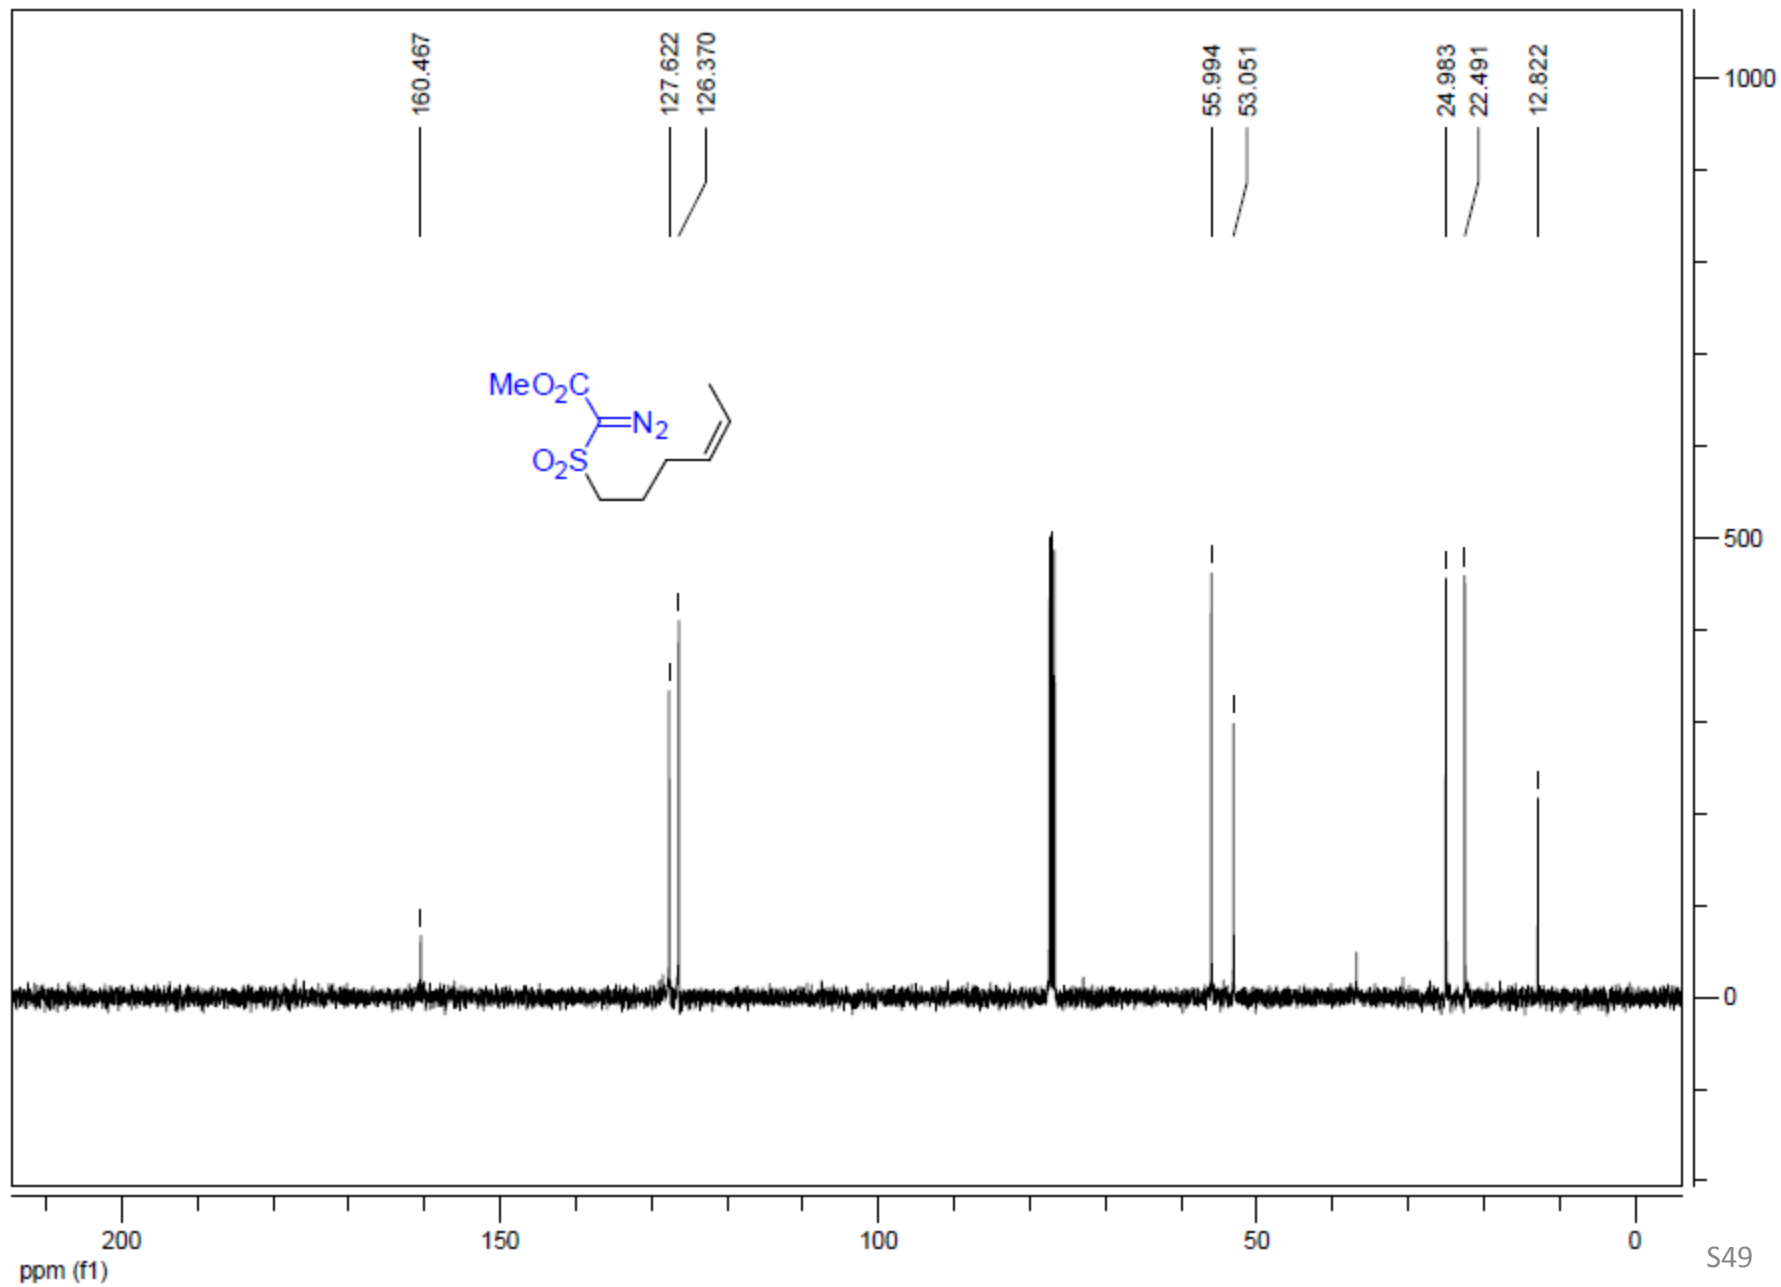

# methyl 3-(4-nitrophenyl)tetrahydrothiophene-2-carboxylate 1,1-dioxide (2a)

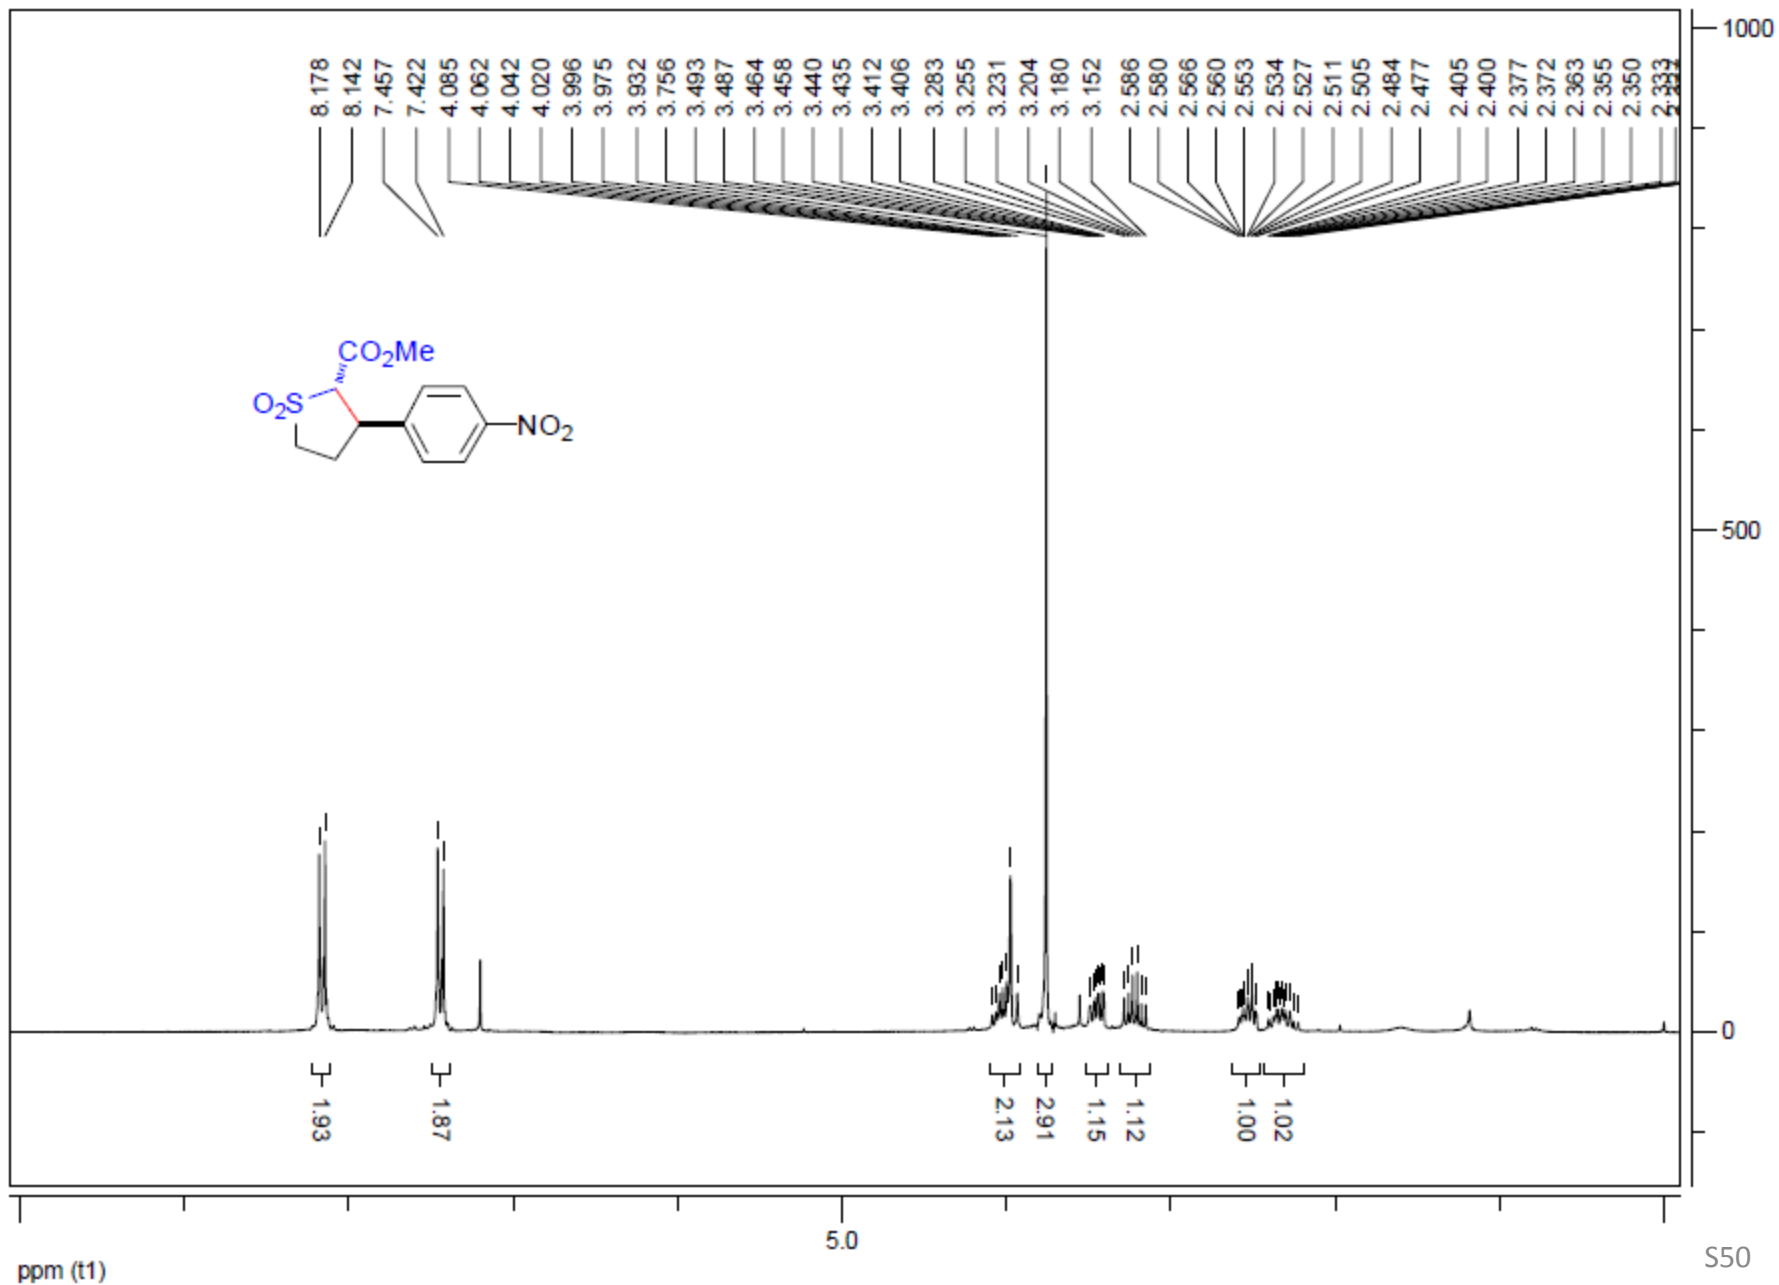

# methyl 3-(4-nitrophenyl)tetrahydrothiophene-2-carboxylate **(2a)**

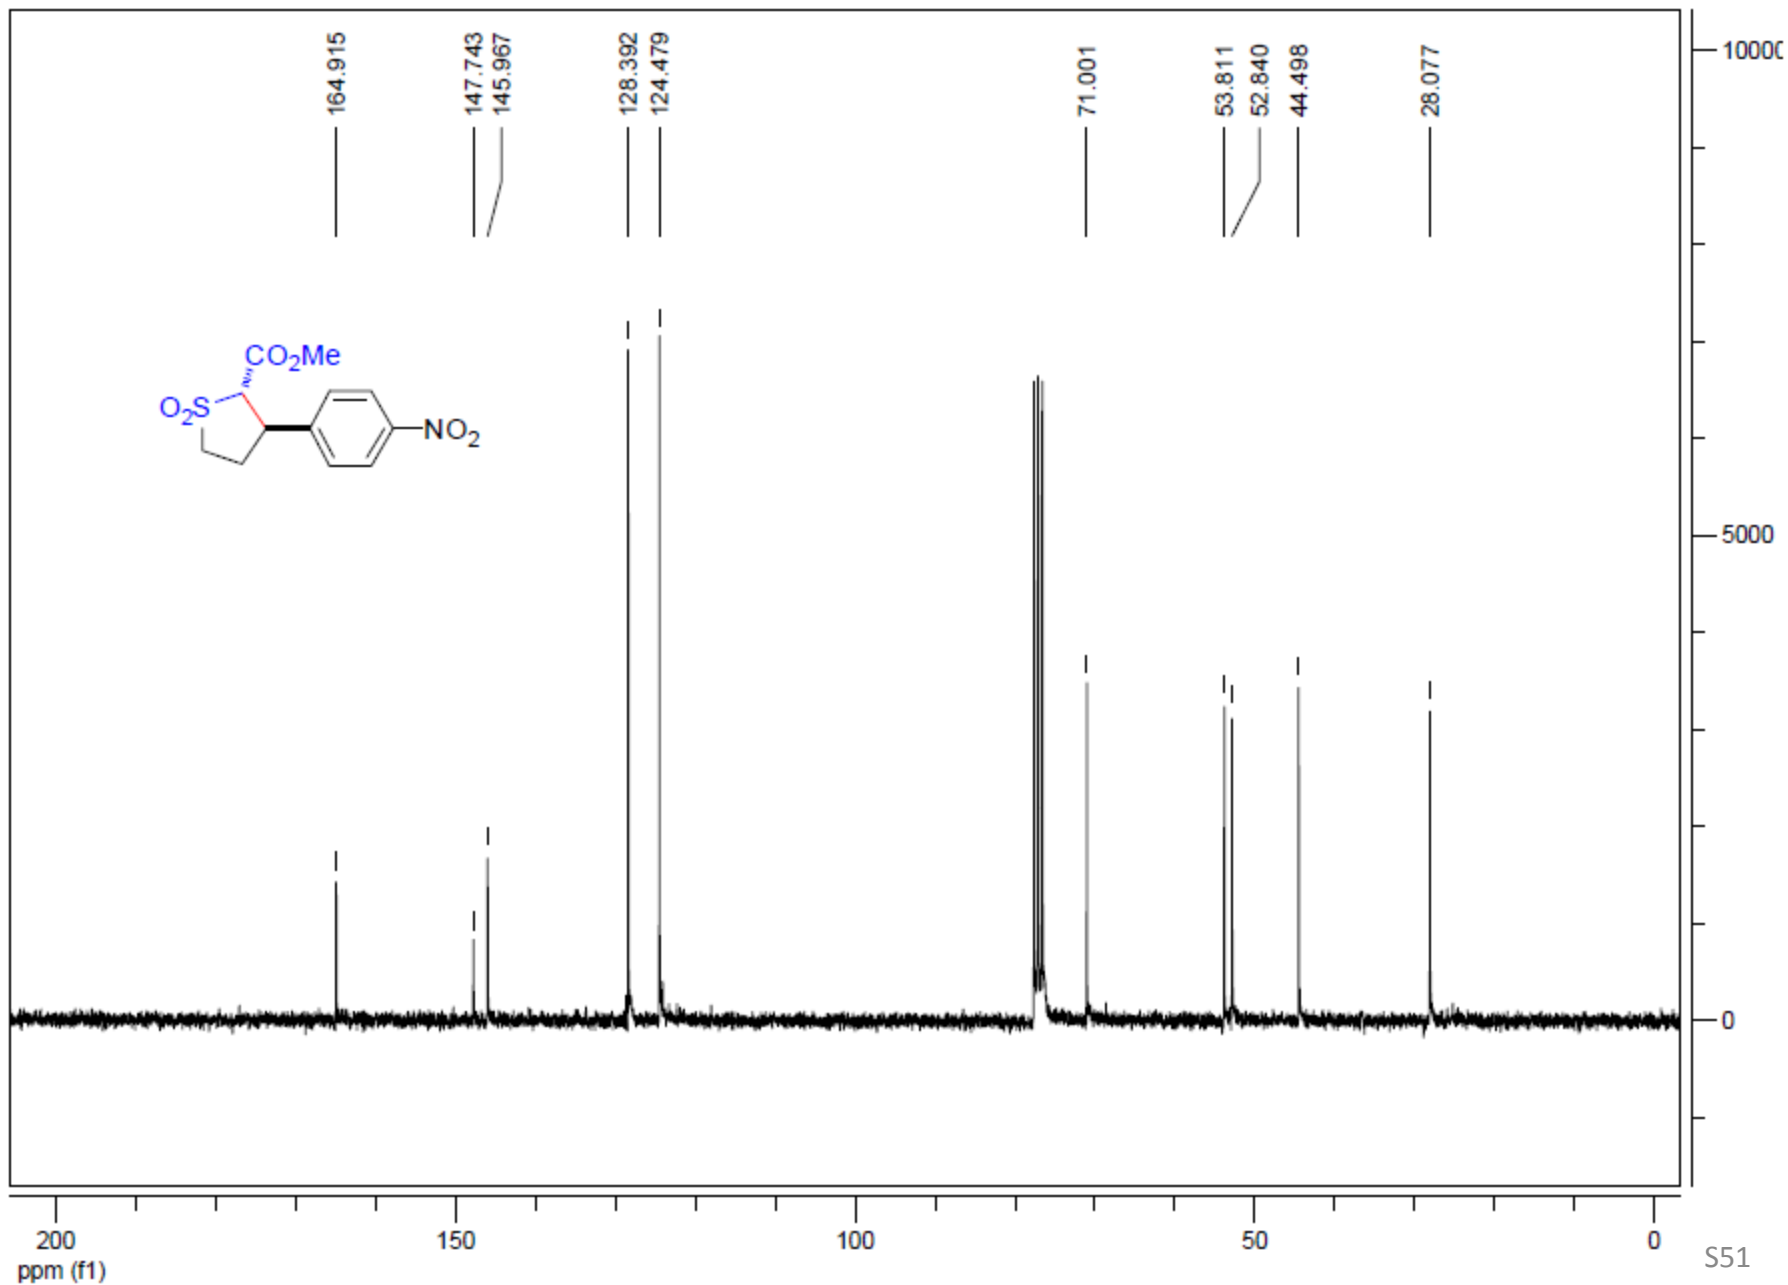



# methyl 3-(4-nitrophenyl)tetrahydrothiophene-2-carboxylate 1,1-dioxide (2a)

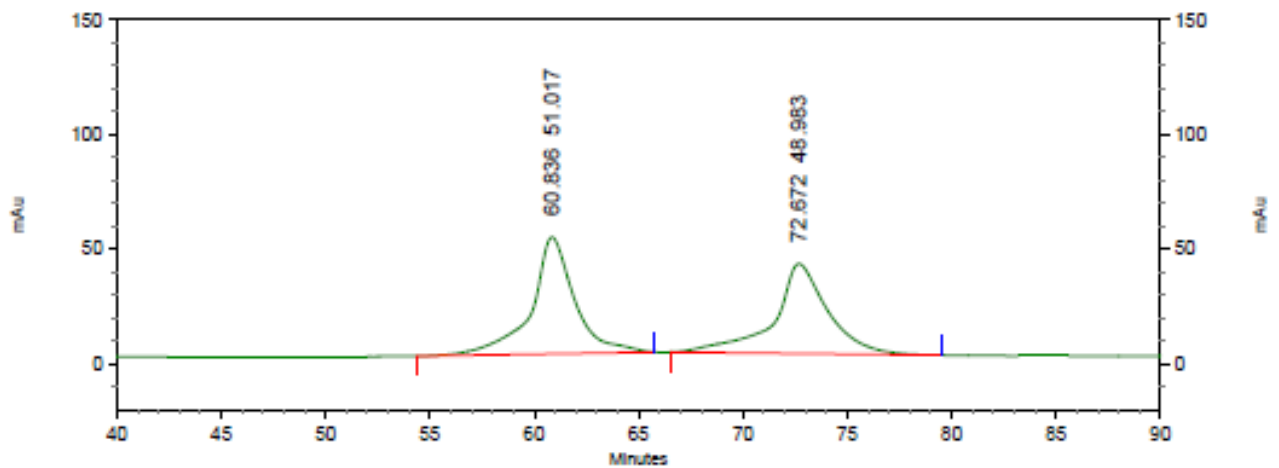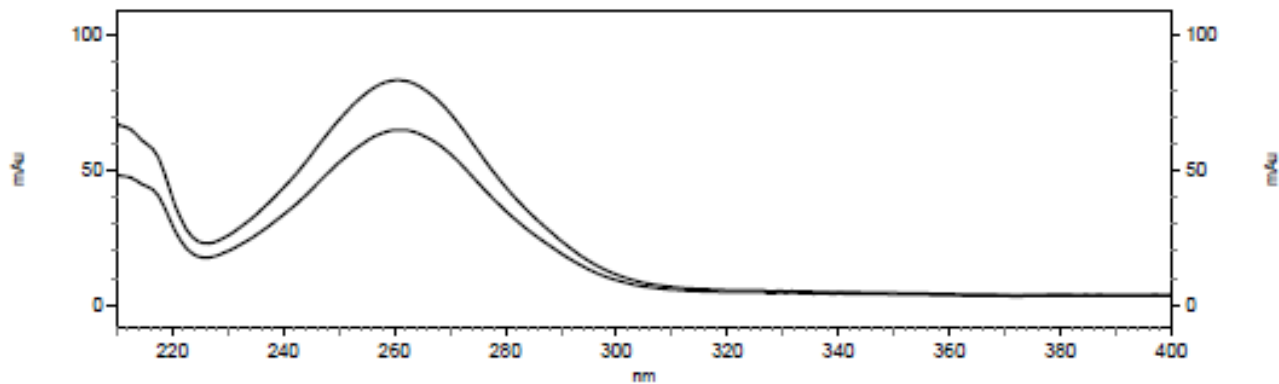

6: 268 nm, 4 nm Results

| Pk # | Retention Time | Area Percent |
|------|----------------|--------------|
| 1    | 0.168          | 0.000        |
| 2    | 60.836         | 51.017       |
| 3    | 72.672         | 48.983       |

|        |  |         |
|--------|--|---------|
| Totals |  | 100.000 |
|--------|--|---------|

# methyl 3-(4-nitrophenyl)tetrahydrothiophene-2-carboxylate 1,1-dioxide (**2a**)

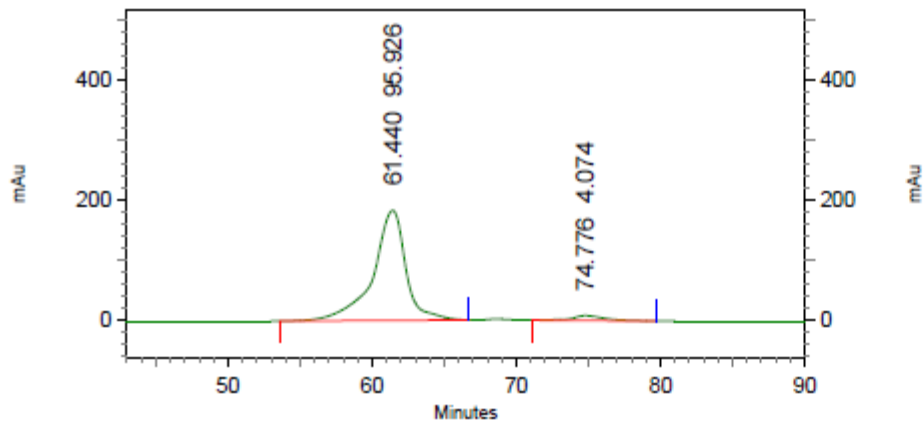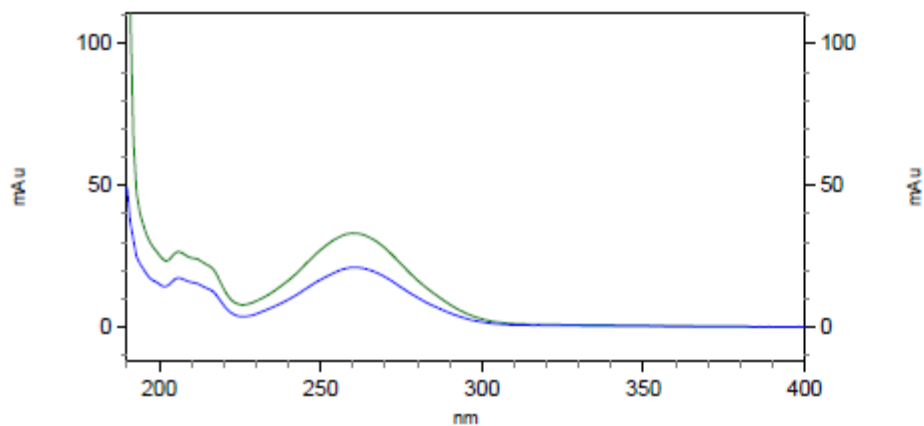

8: 280 nm, 4 nm

Results

| Pk #   | Name | Retention Time | Area Percent |
|--------|------|----------------|--------------|
| 1      |      | 61.440         | 95.926       |
| 2      |      | 74.776         | 4.074        |
| Totals |      |                | 100.000      |

methyl 3-(4-(trifluoromethyl)phenyl)tetrahydrothiophene-2-carboxylate 1,1-dioxide  
**(2b)**

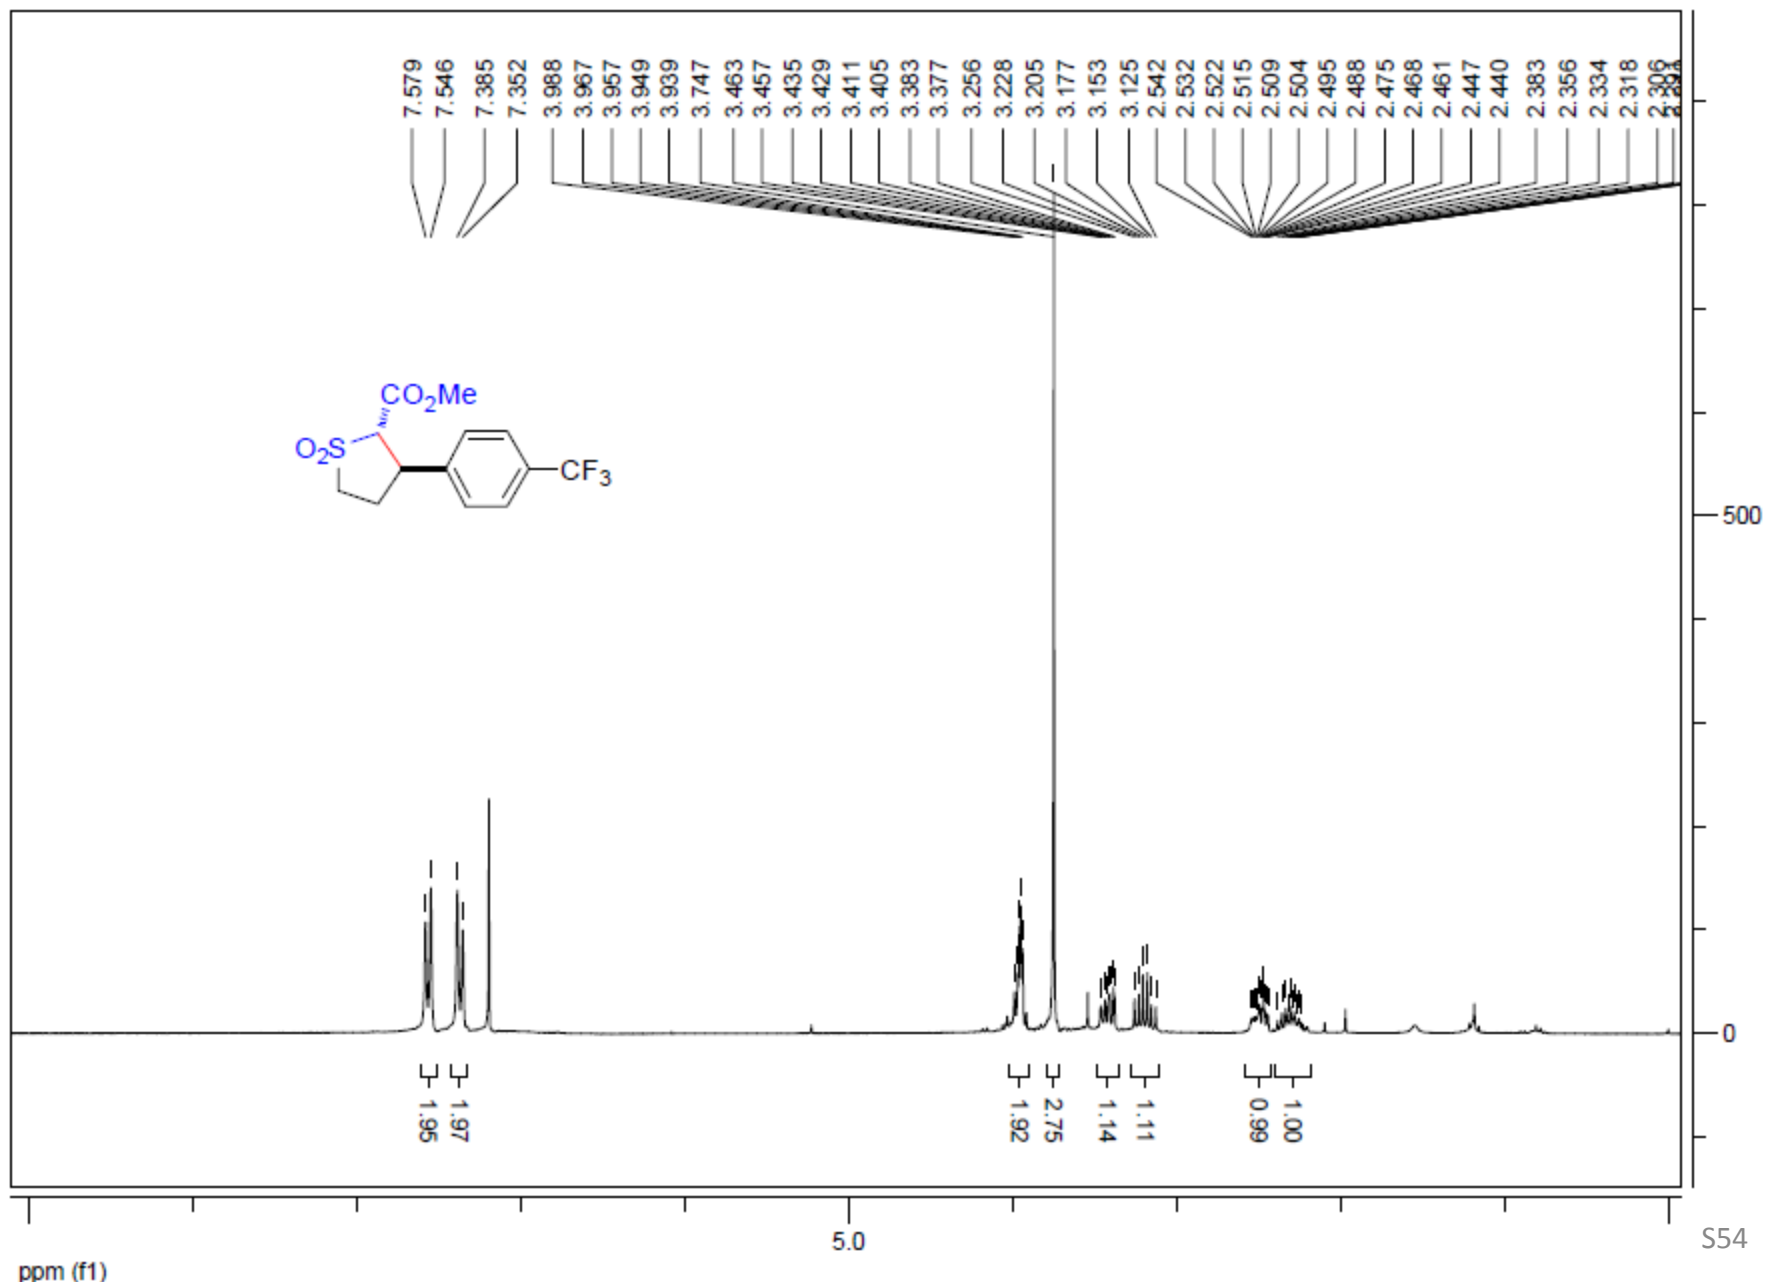

methyl 3-(4-(trifluoromethyl)phenyl)tetrahydrothiophene-2-carboxylate 1,1-dioxide  
**(2b)**

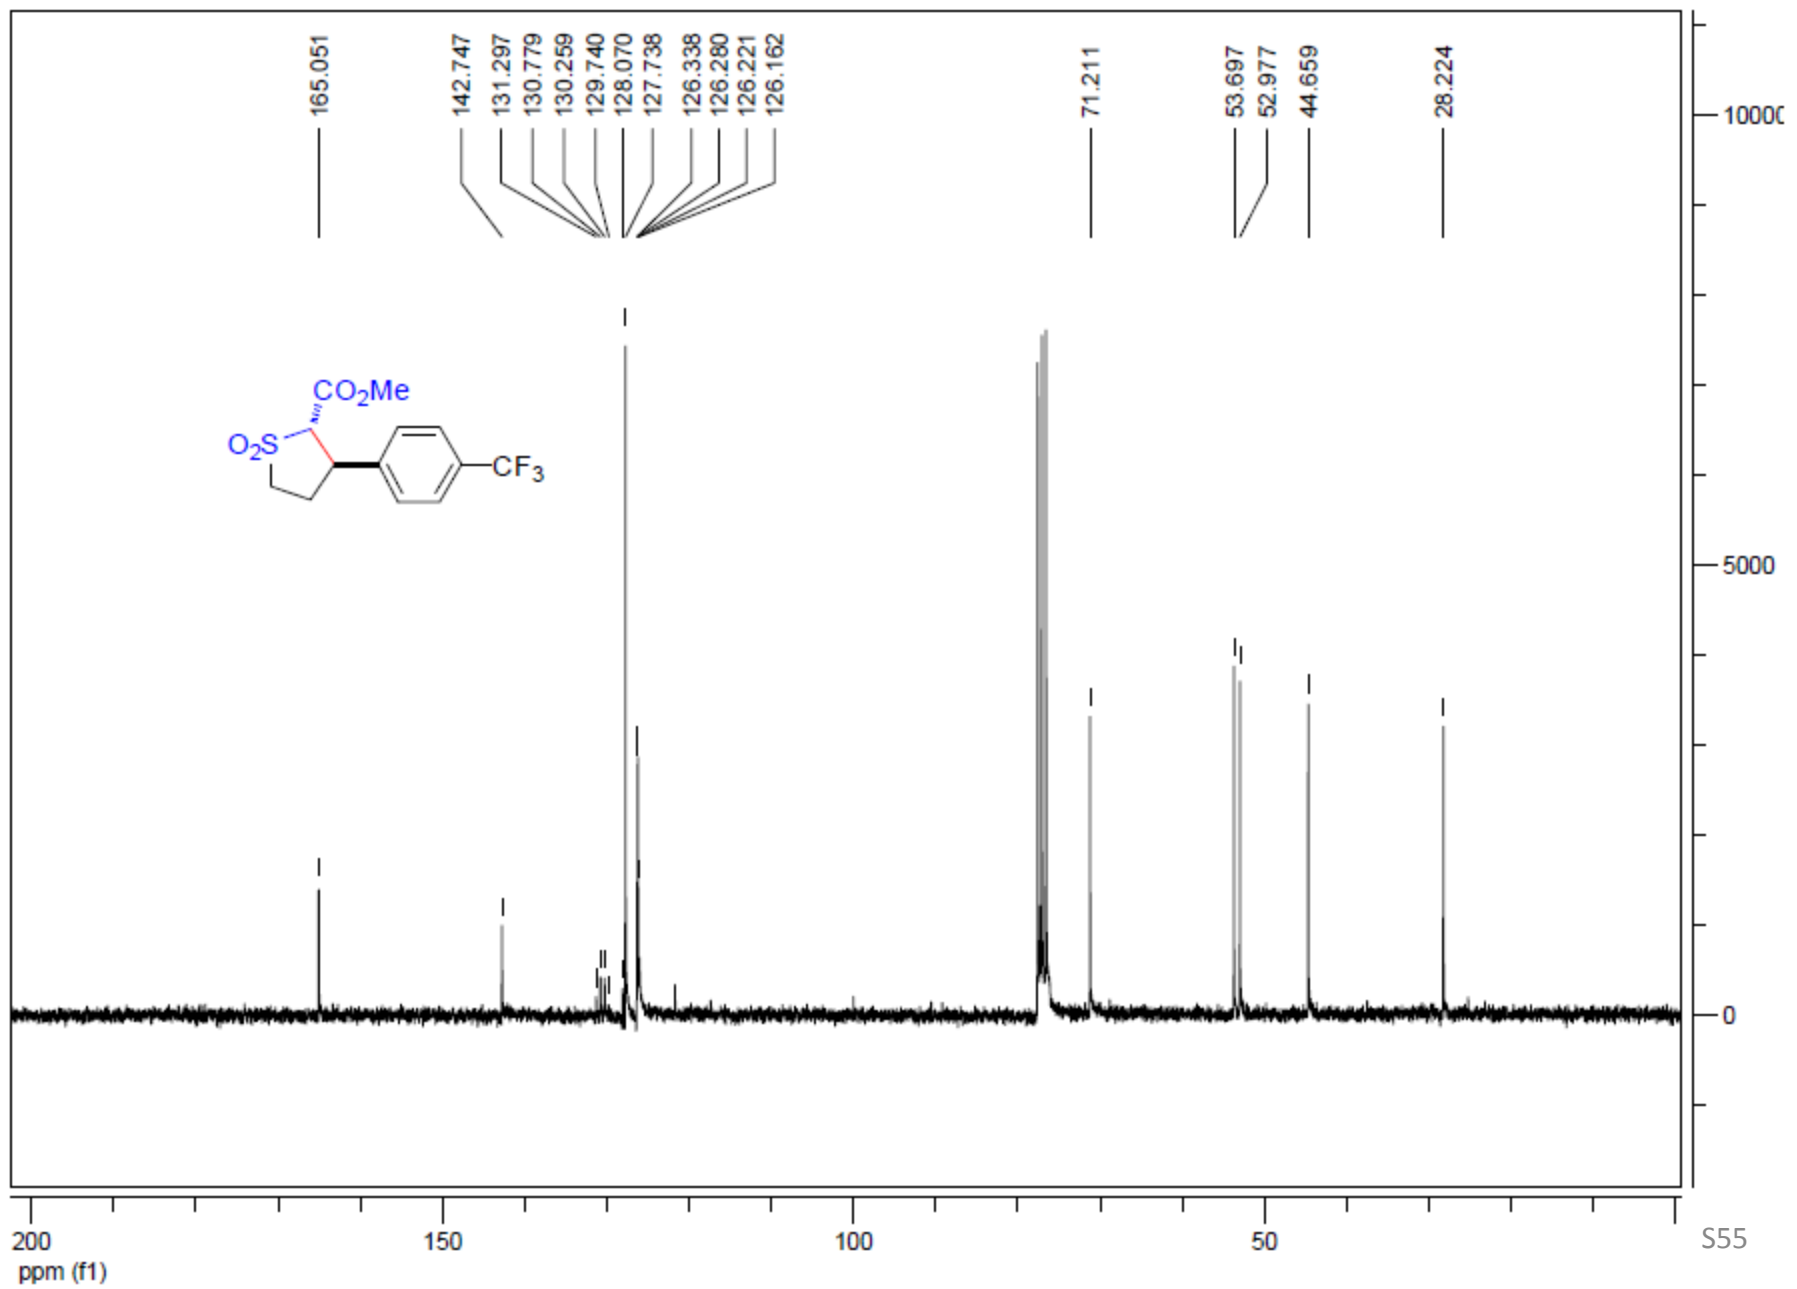

# methyl 3-(4-(trifluoromethyl)phenyl)tetrahydrothiophene-2-carboxylate 1,1-dioxide (2b)

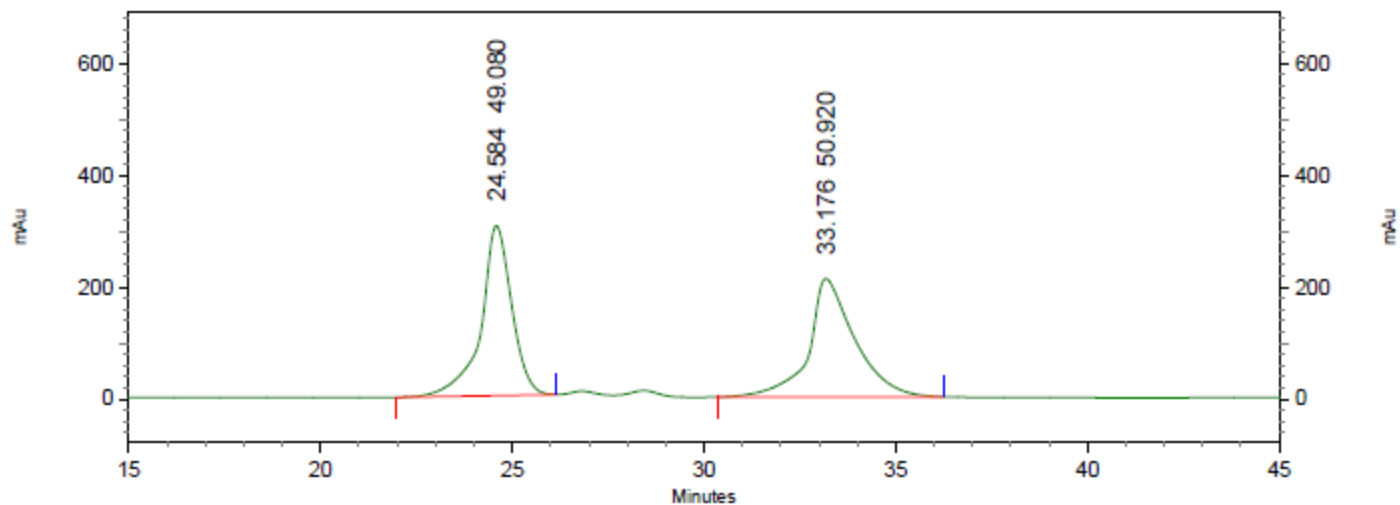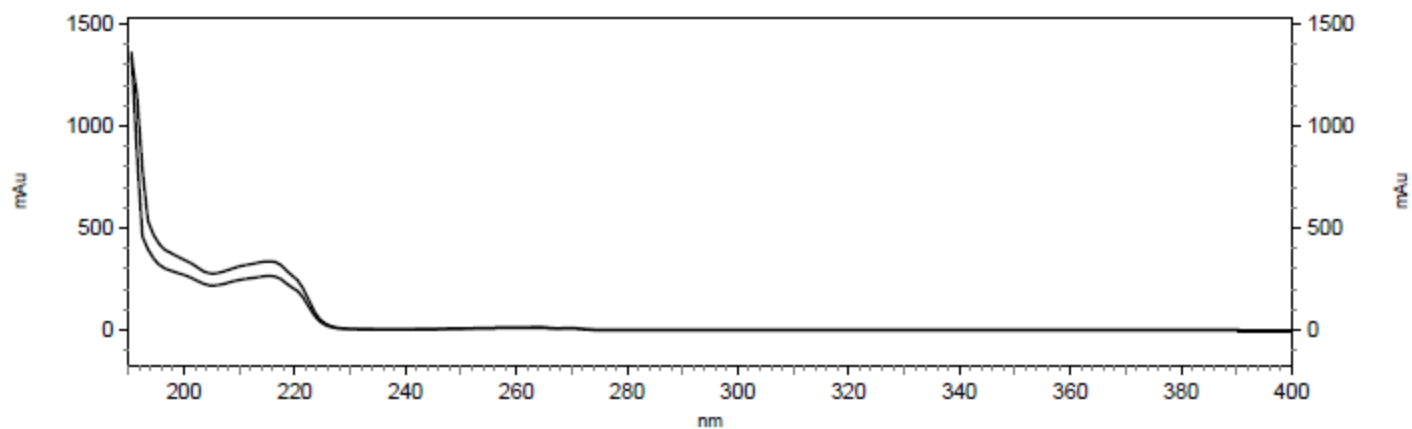

7: 221 nm, 4 nm Results

| Pk # | Retention Time | Area Percent |
|------|----------------|--------------|
| 1    | 24.584         | 49.080       |
| 2    | 33.176         | 50.920       |

|        |  |         |
|--------|--|---------|
| Totals |  | 100.000 |
|--------|--|---------|

methyl 3-(4-(trifluoromethyl)phenyl)tetrahydrothiophene-2-carboxylate 1,1-dioxide  
**(2b)**

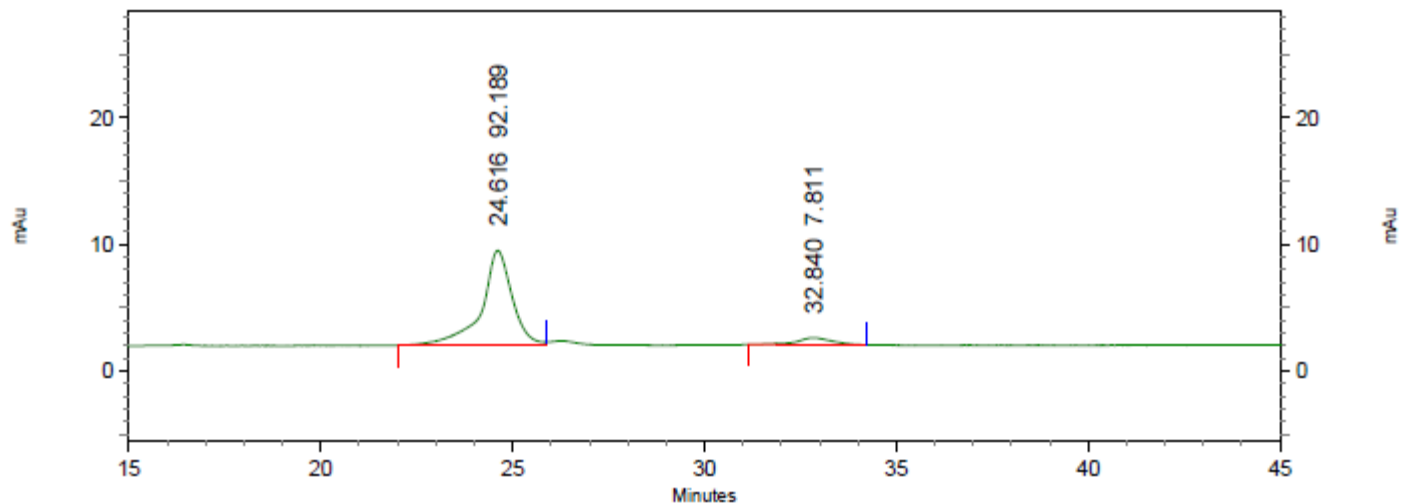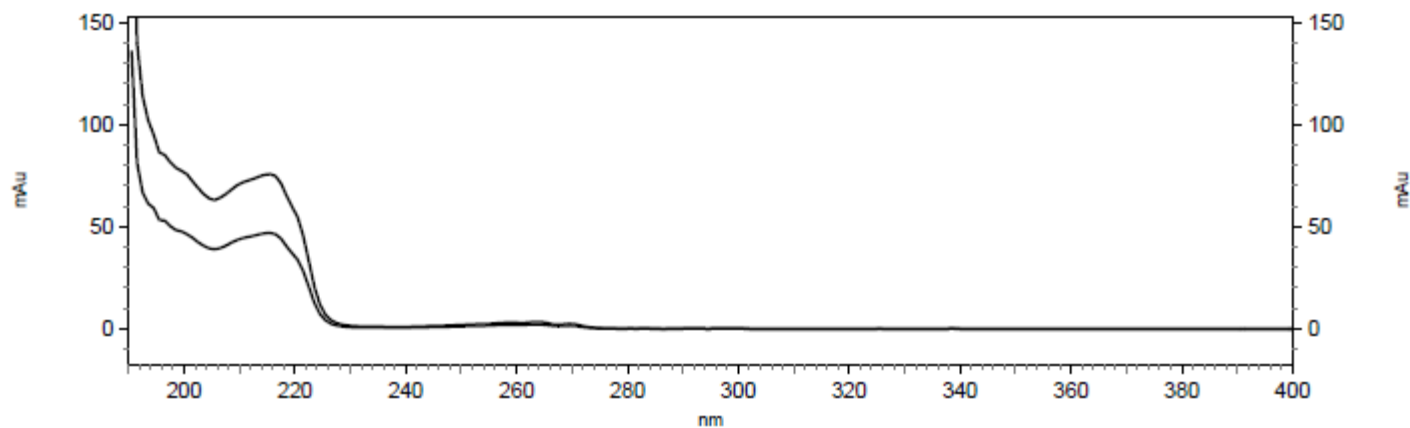

4: 260 nm, 4 nm Results

| Pk # | Retention Time | Area Percent |
|------|----------------|--------------|
| 1    | 24.616         | 92.189       |
| 2    | 32.840         | 7.811        |

|        |         |
|--------|---------|
| Totals | 100.000 |
|--------|---------|

# methyl 3-(4-fluorophenyl)tetrahydrothiophene-2-carboxylate (**2c**)

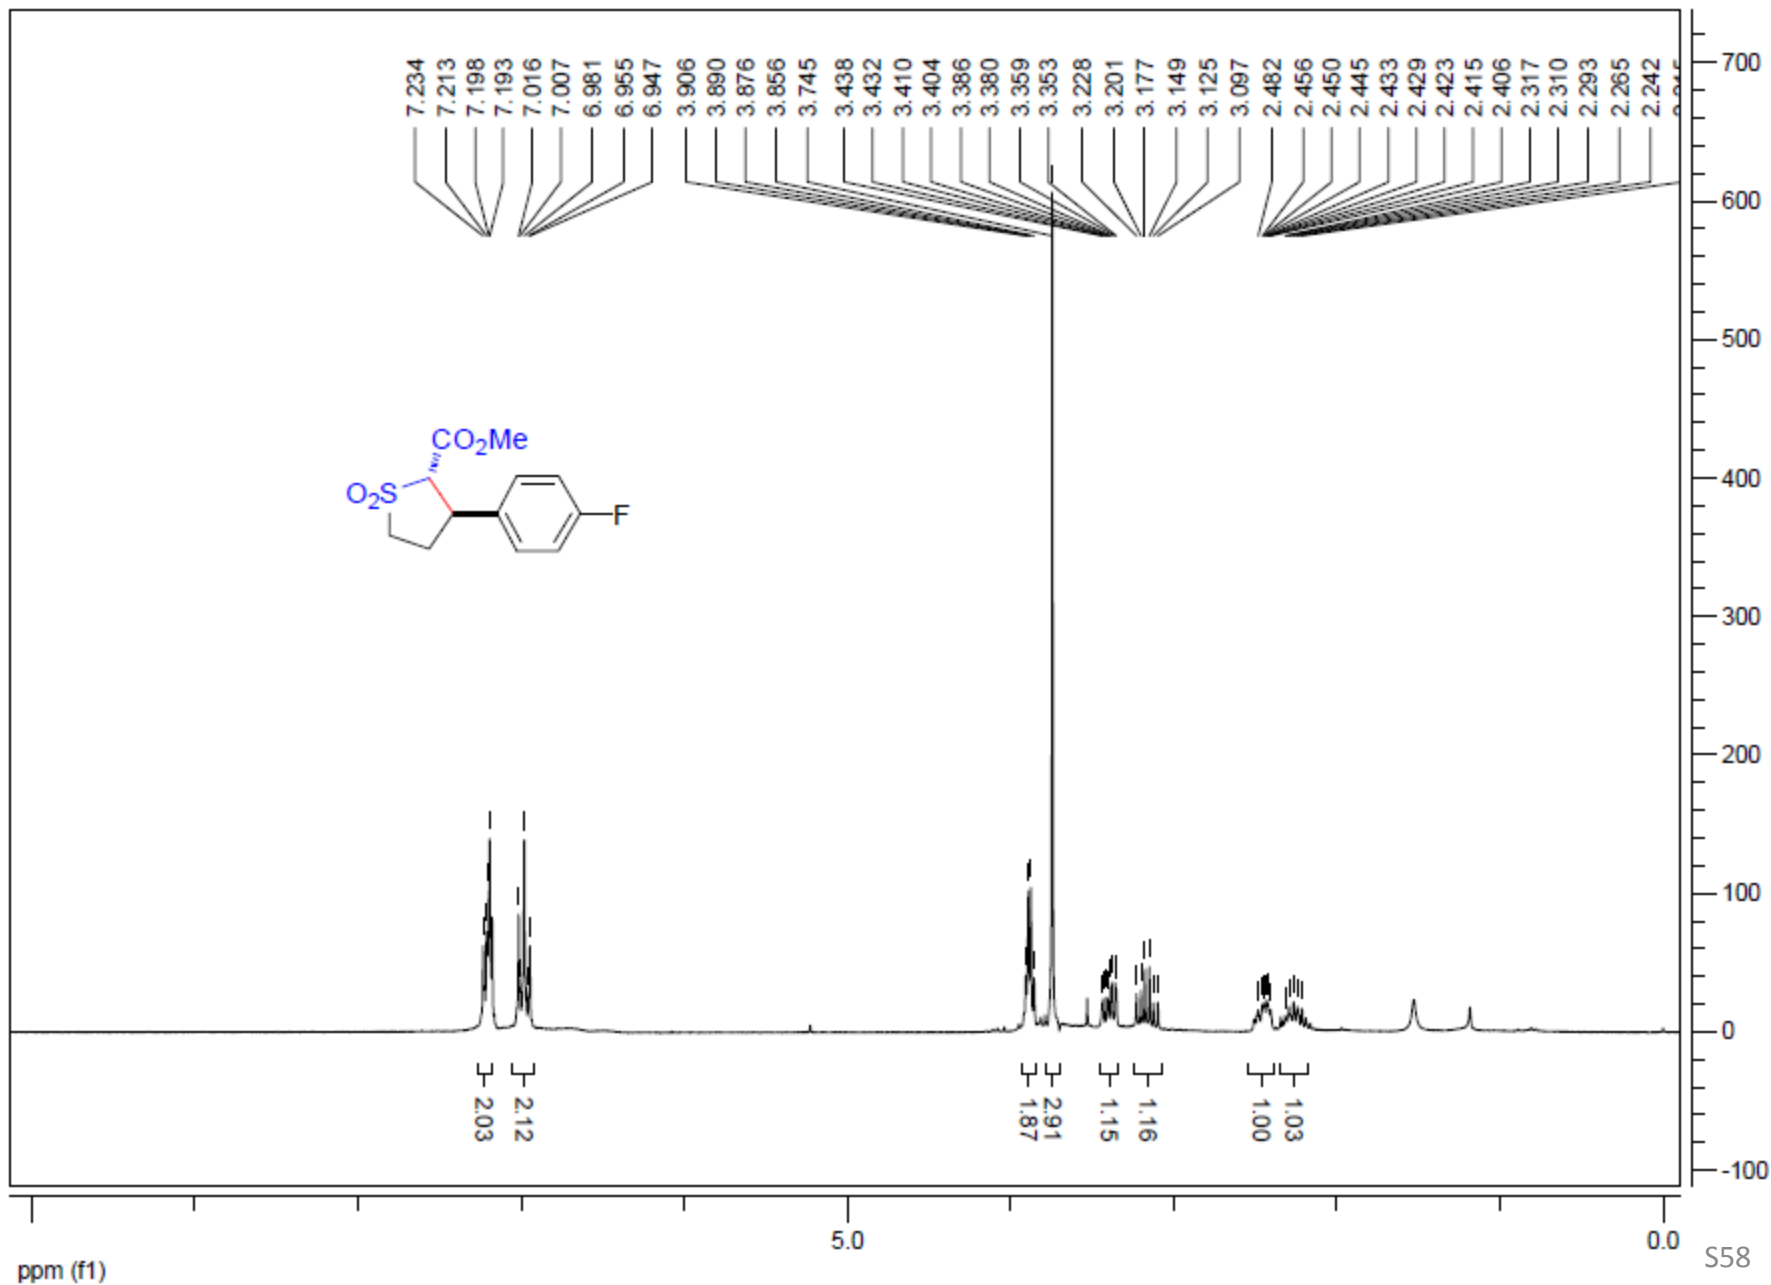

# methyl 3-(4-fluorophenyl)tetrahydrothiophene-2-carboxylate 1,1-dioxide (**2c**)

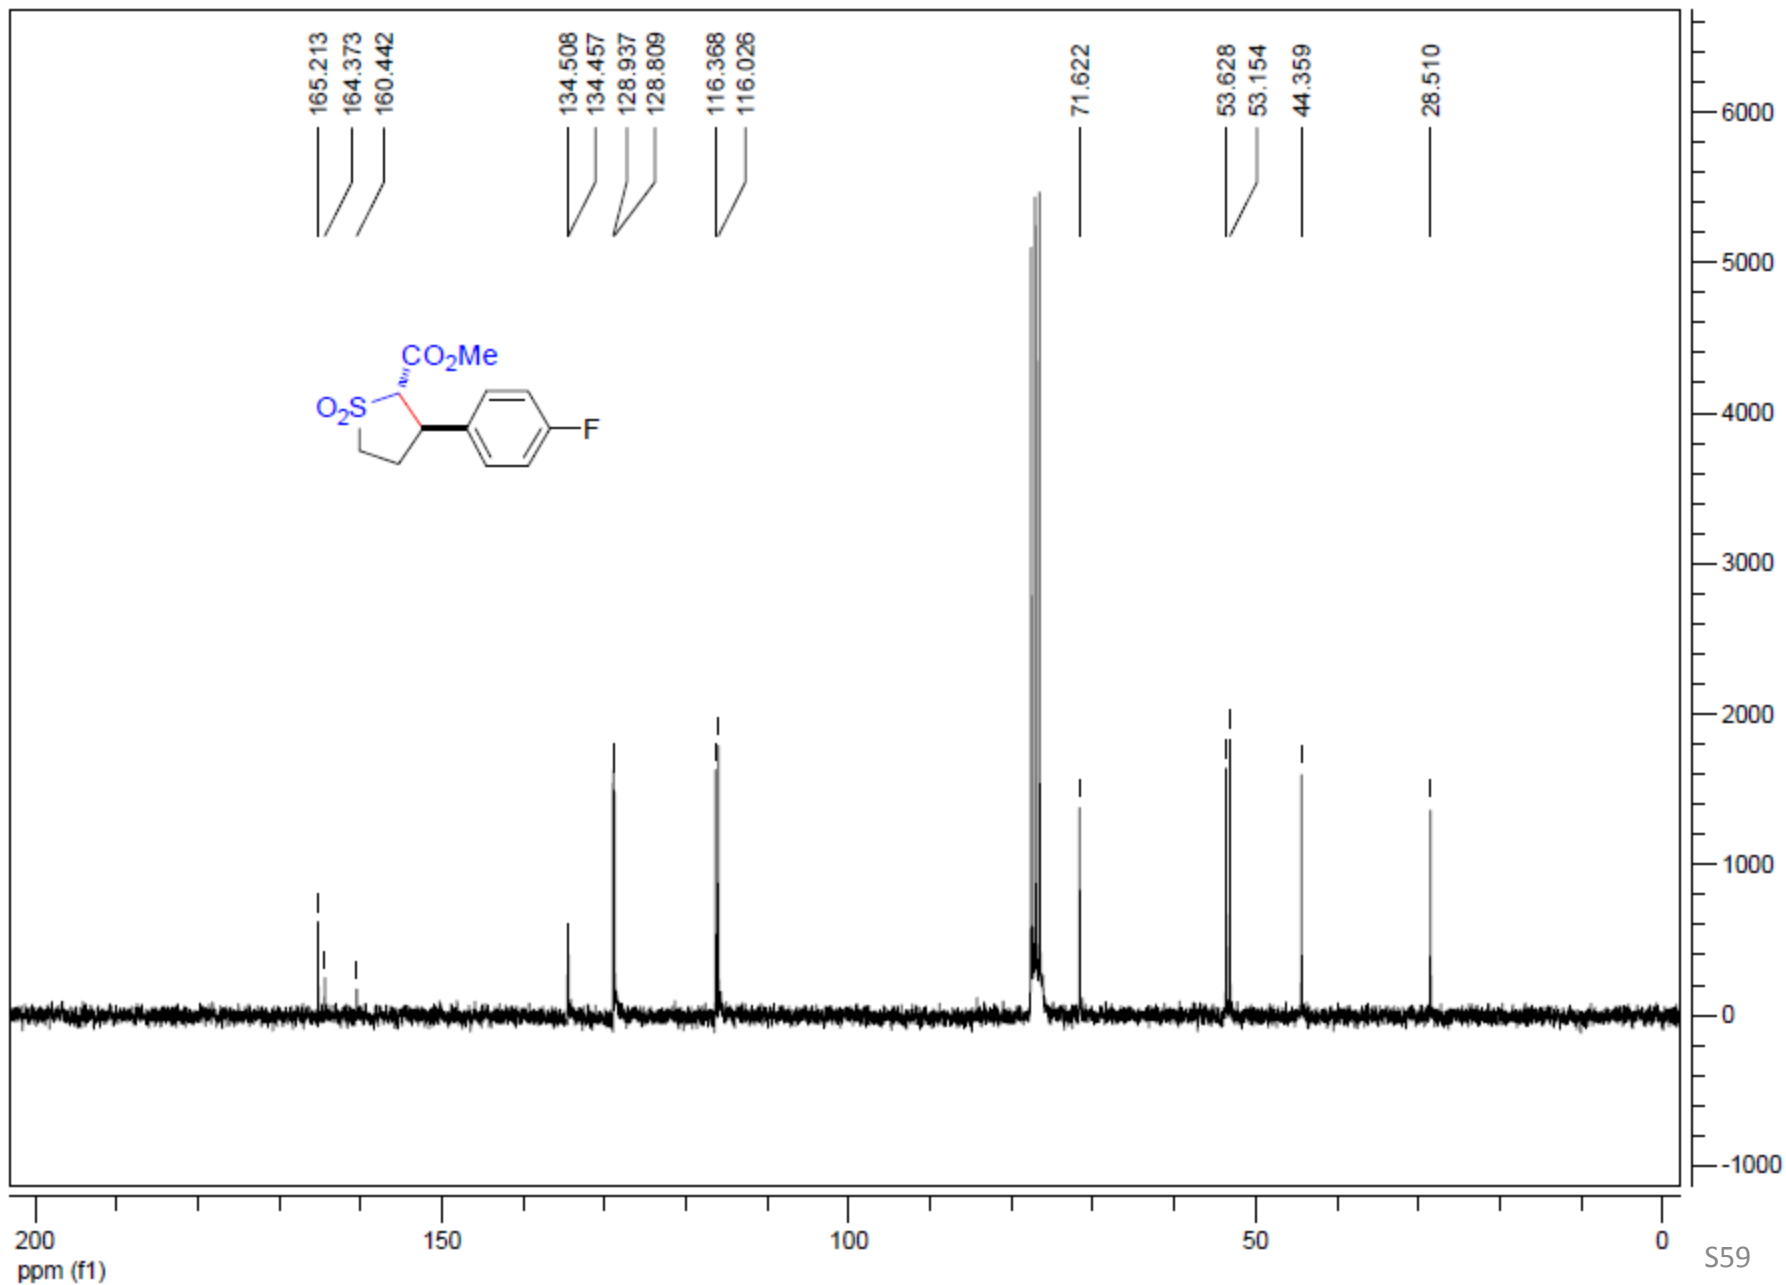



# methyl 3-(4-fluorophenyl)tetrahydrothiophene-2-carboxylate 1,1-dioxide (**2c**)

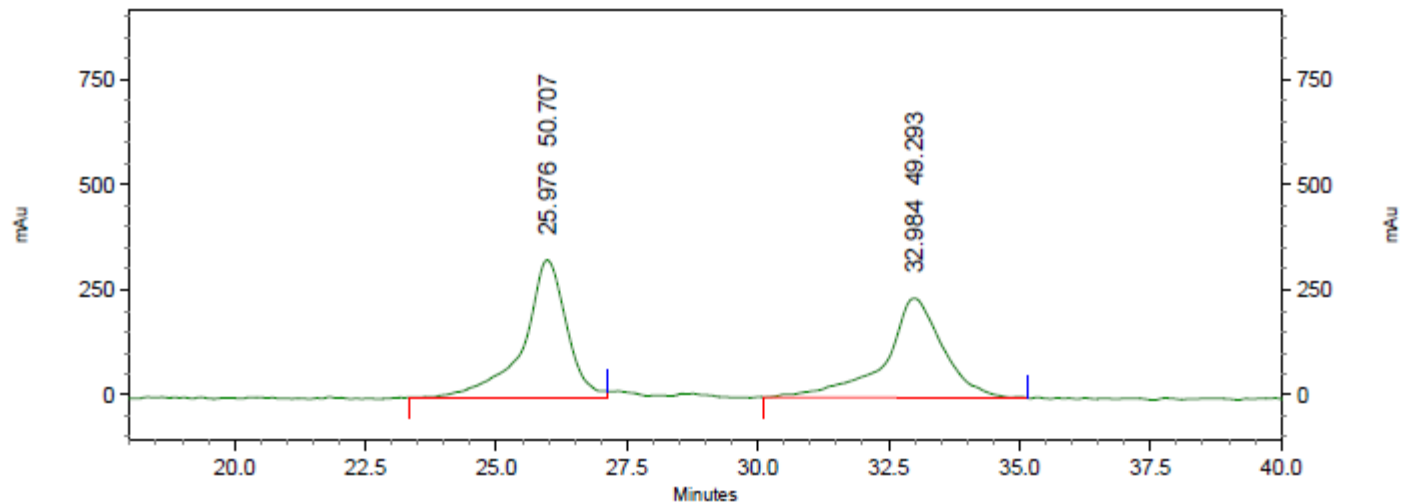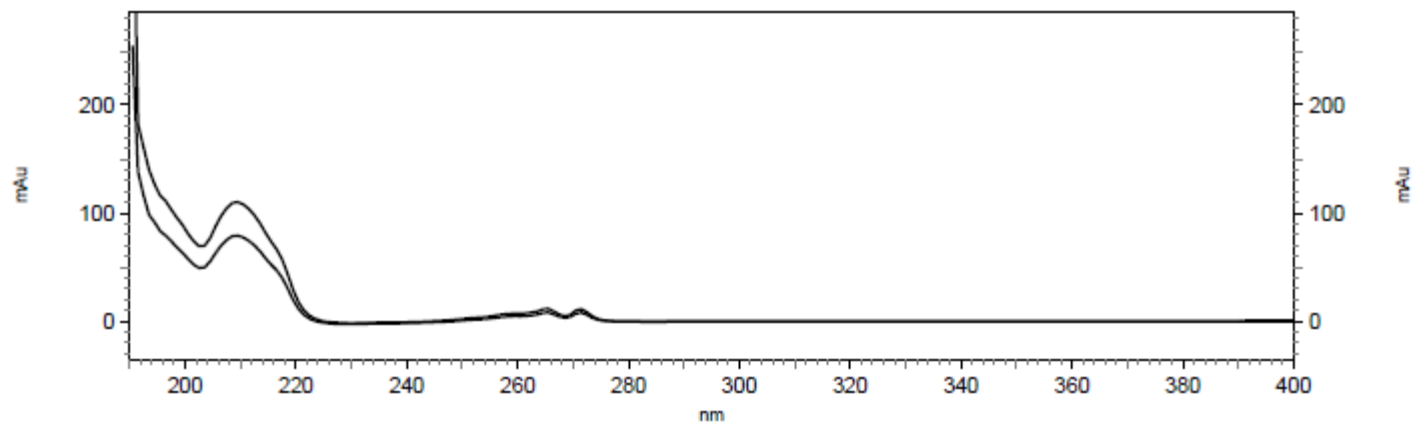

11: 210 nm, 4 nm Results

| Pk # | Retention Time | Area Percent |
|------|----------------|--------------|
| 1    | 25.976         | 50.707       |
| 2    | 32.984         | 49.293       |

|        |         |
|--------|---------|
| Totals | 100.000 |
|--------|---------|

# methyl 3-(4-fluorophenyl)tetrahydrothiophene-2-carboxylate 1,1-dioxide (**2c**)

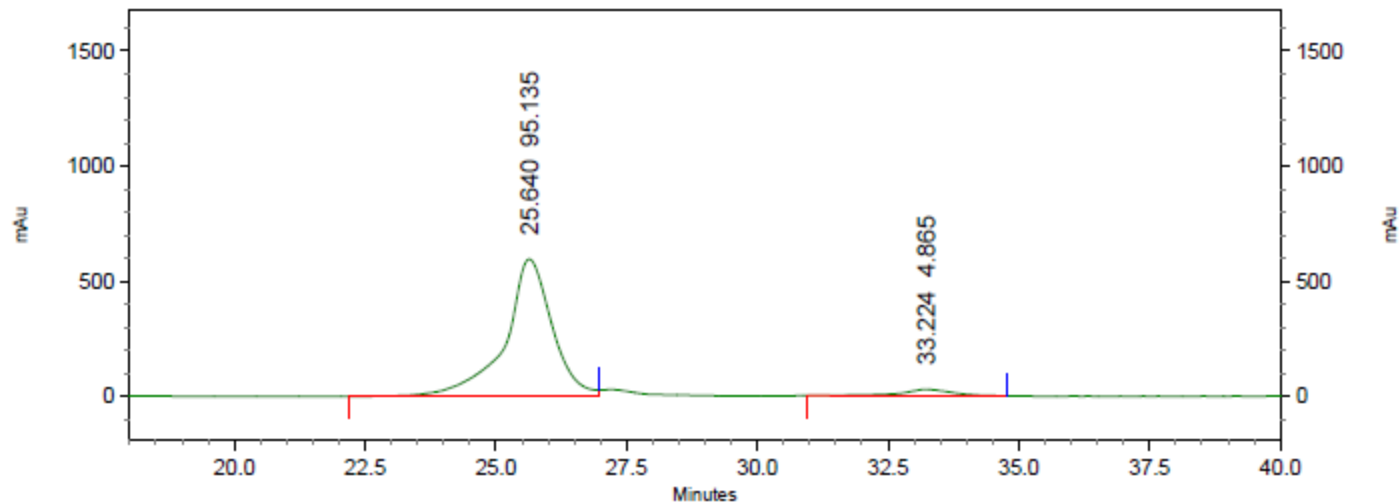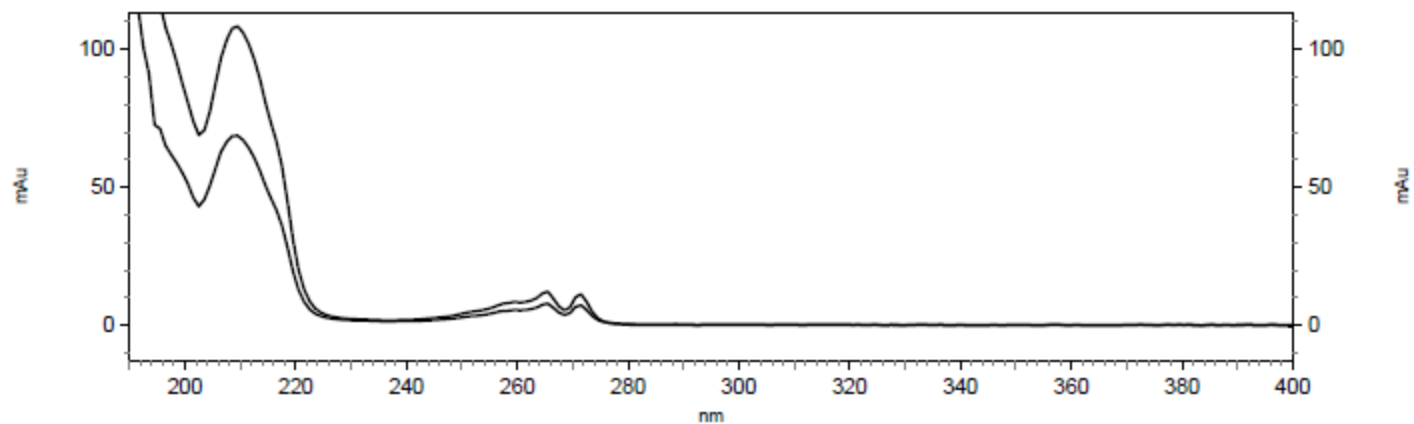

4: 212 nm, 4 nm Results

| Pk #   | Retention Time | Area Percent |
|--------|----------------|--------------|
| 1      | 25.640         | 95.135       |
| 2      | 33.224         | 4.865        |
| Totals |                | 100.000      |

# methyl 3-(4-chlorophenyl)tetrahydrothiophene-2-carboxylate **(2d)**

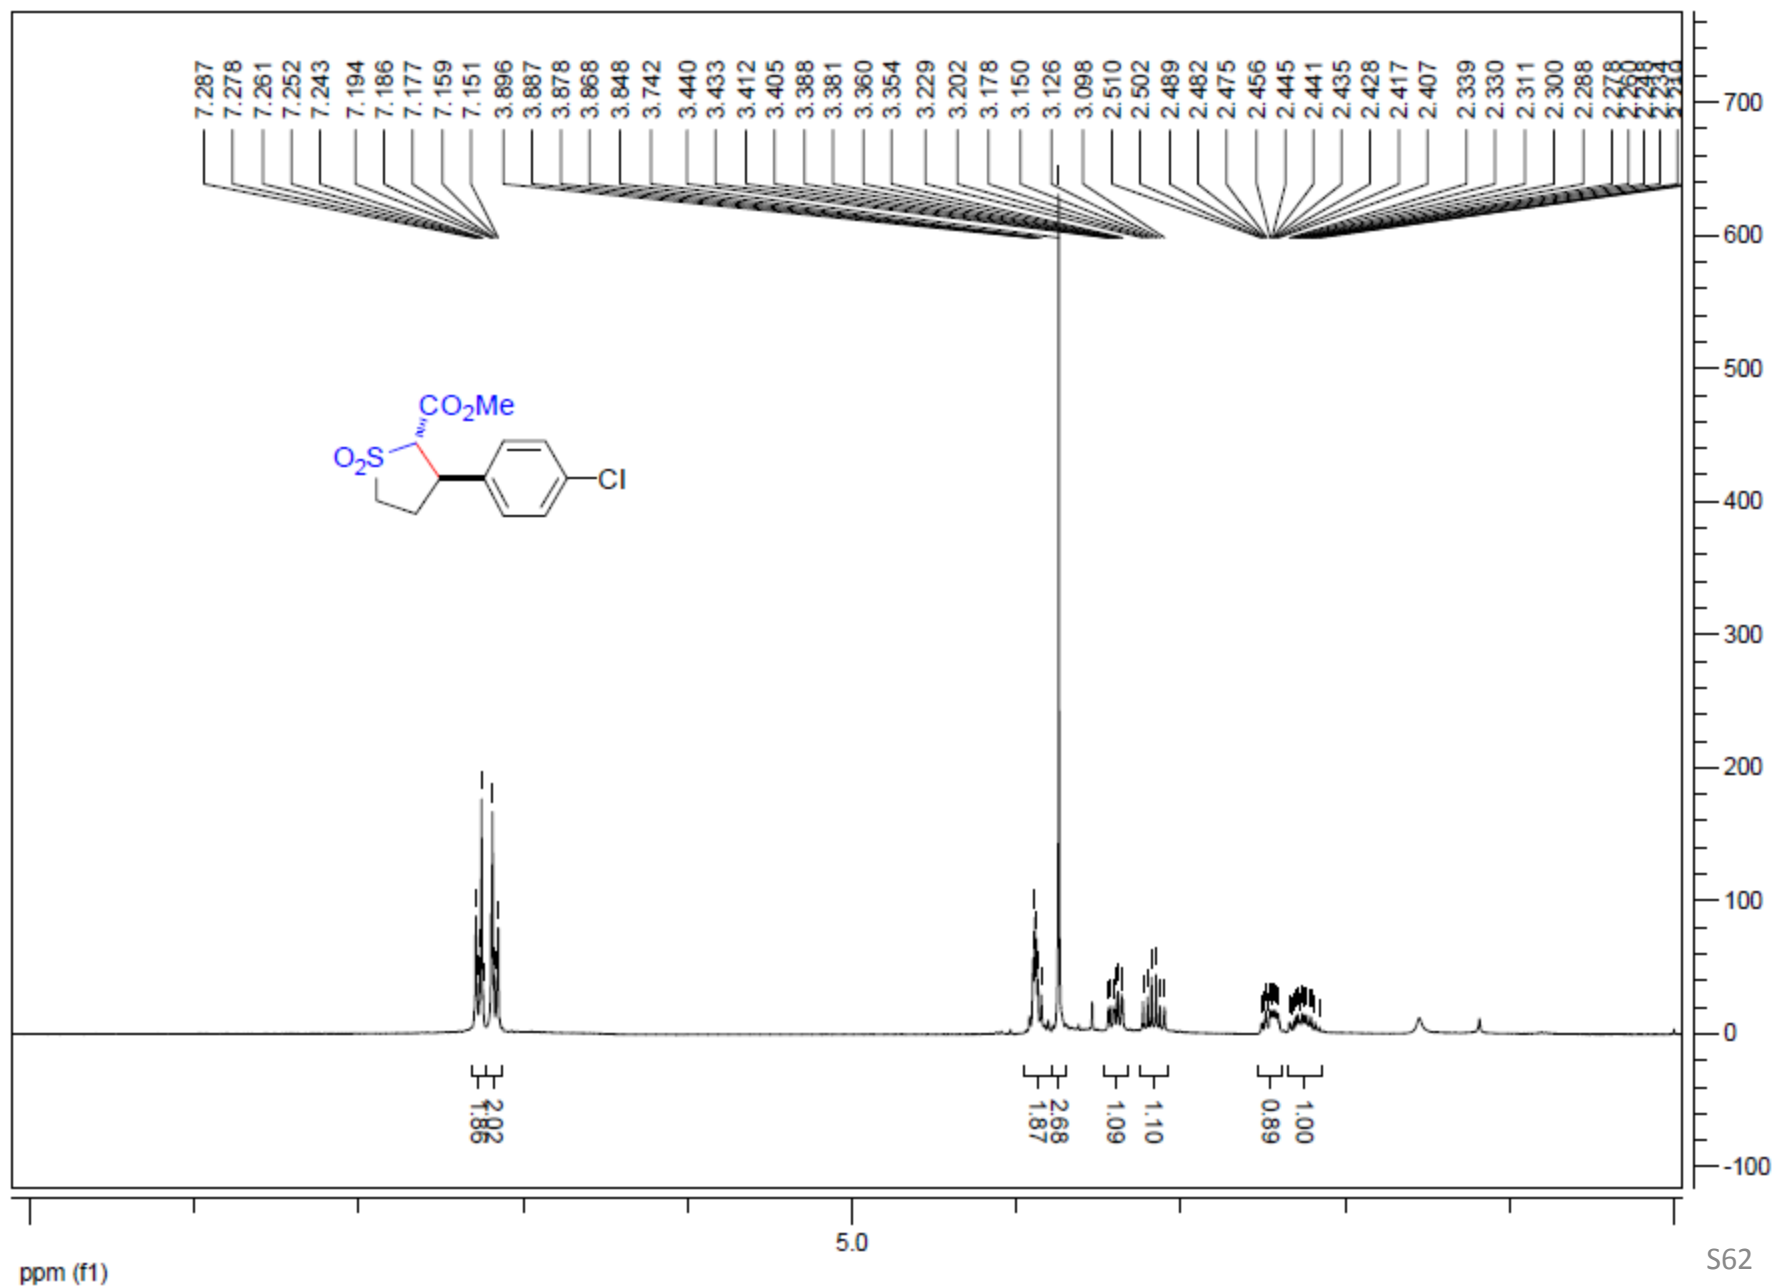

# methyl 3-(4-chlorophenyl)tetrahydrothiophene-2-carboxylate 1,1-dioxide (**2d**)

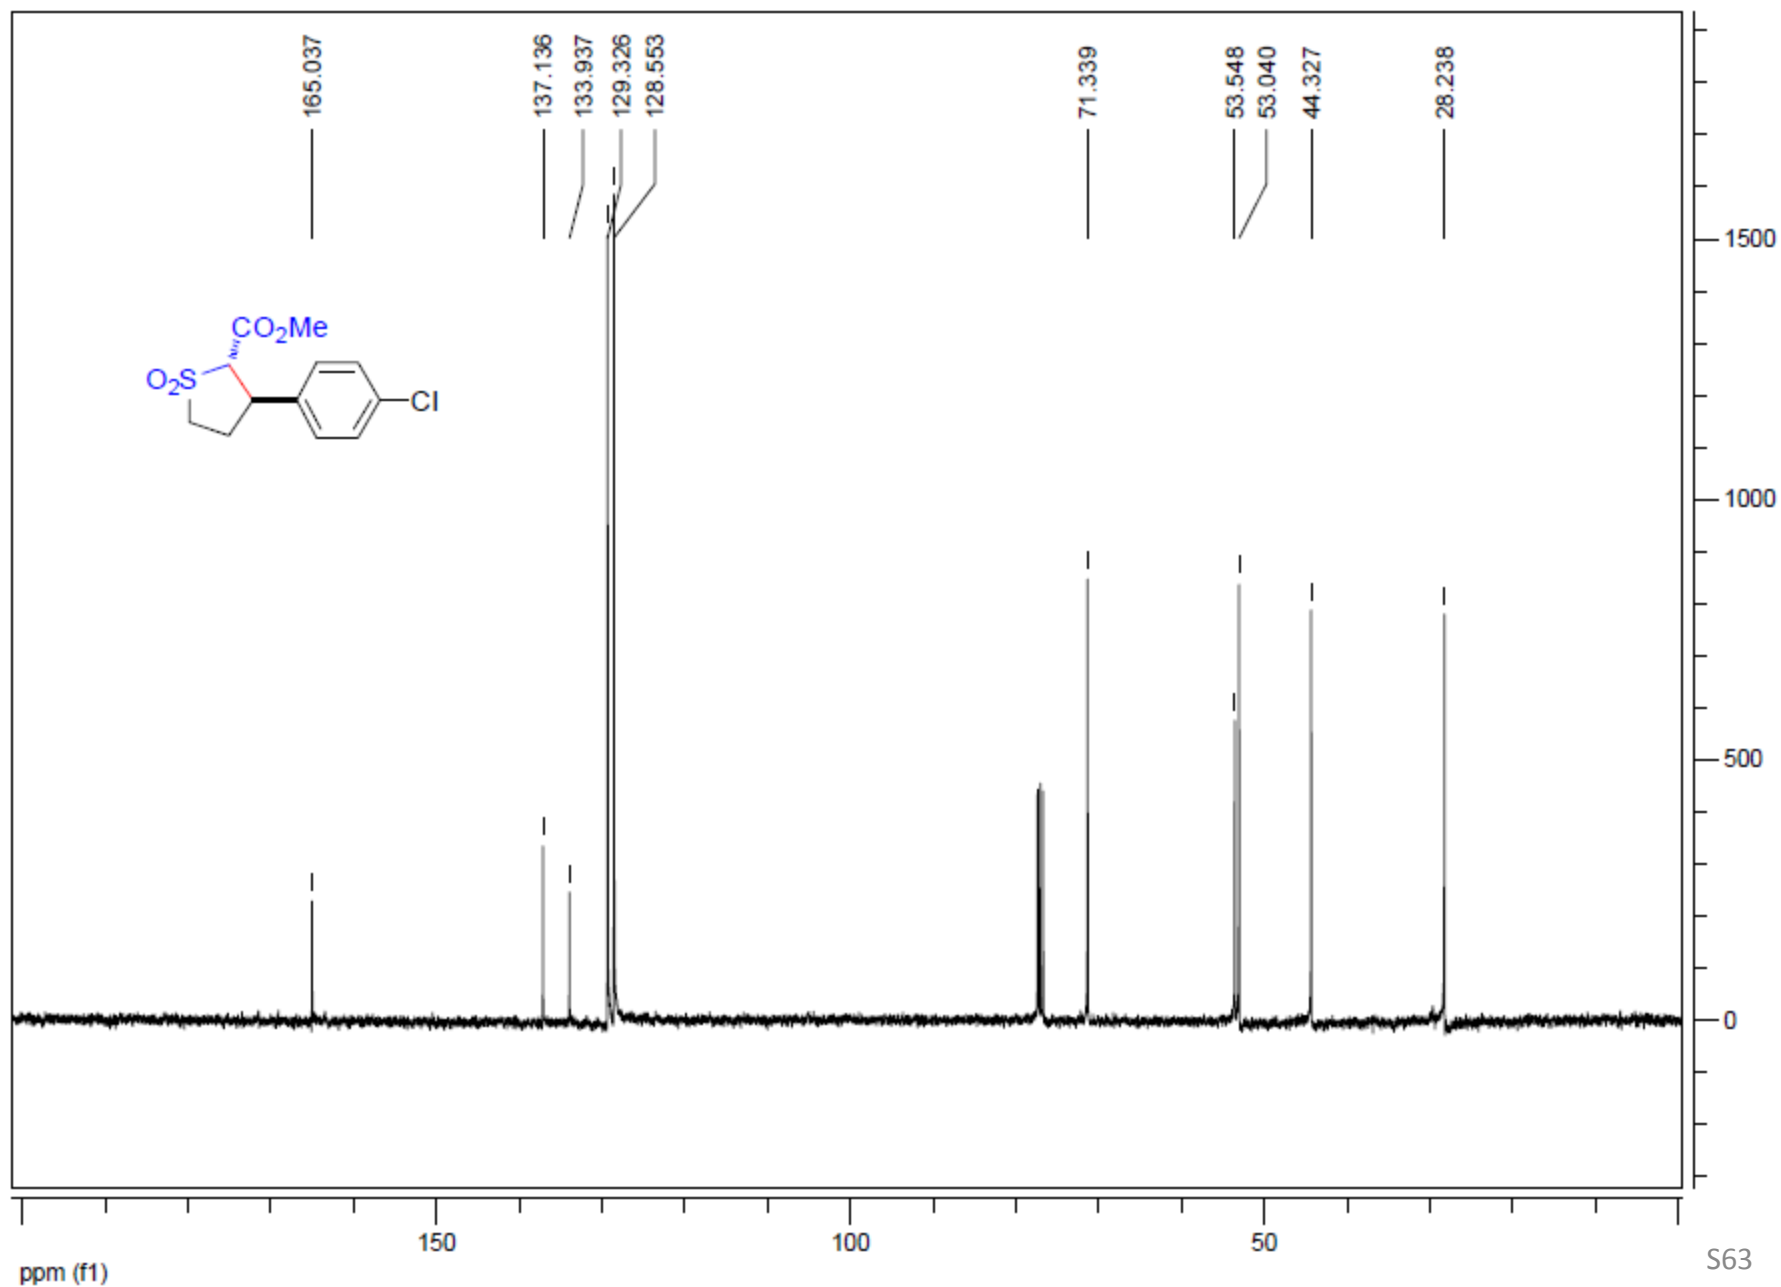

# methyl 3-(4-chlorophenyl)tetrahydrothiophene-2-carboxylate 1,1-dioxide (2d)

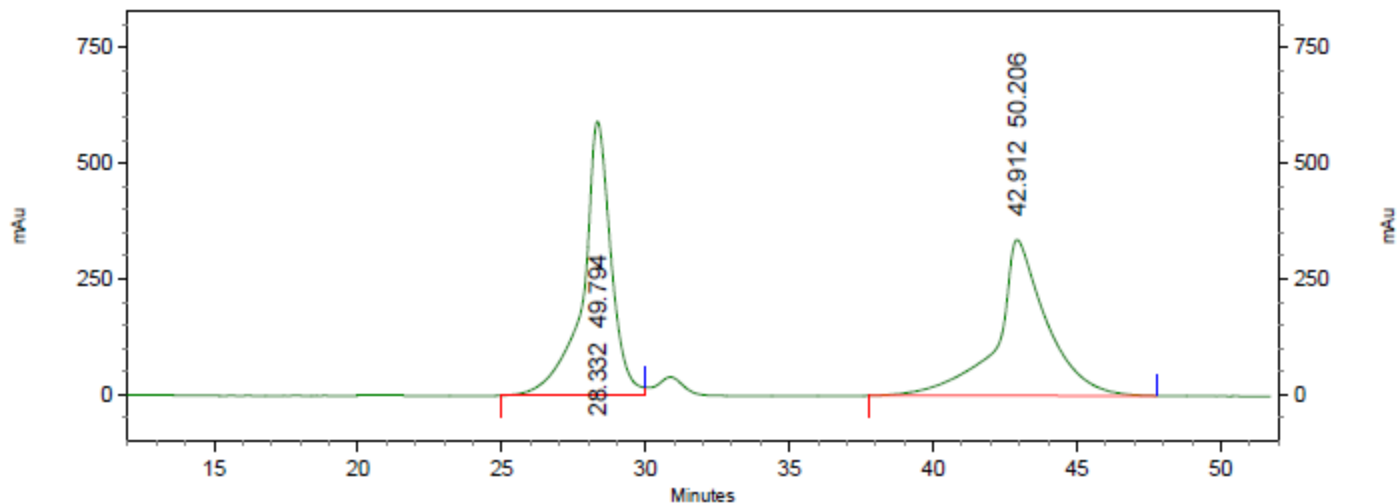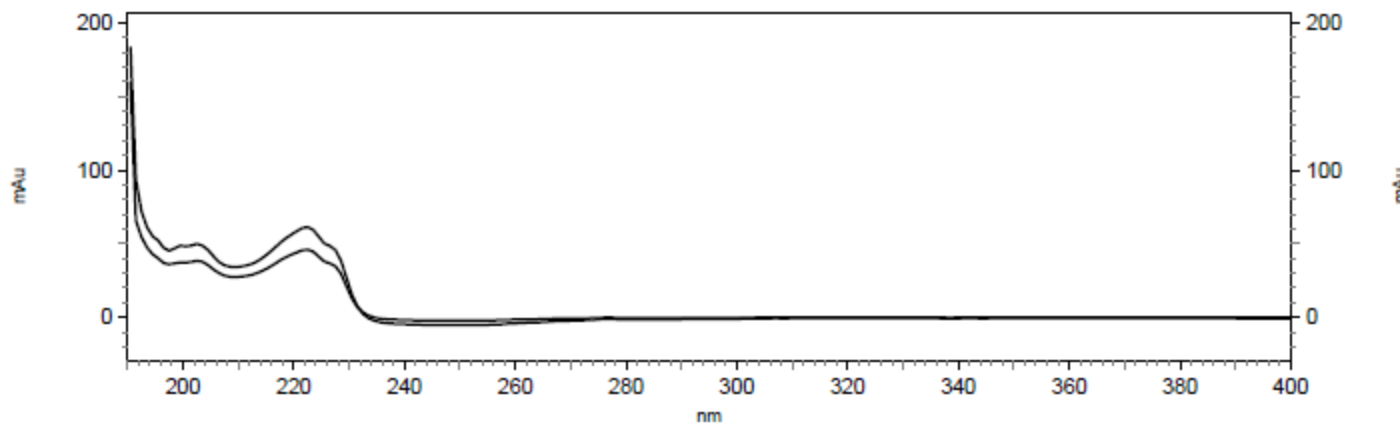

11: 223 nm, 4 nm Results

| Pk #   | Retention Time | Area Percent |
|--------|----------------|--------------|
| 1      | 28.332         | 49.794       |
| 2      | 42.912         | 50.206       |
| Totals |                | 100.000      |

# methyl 3-(4-chlorophenyl)tetrahydrothiophene-2-carboxylate 1,1-dioxide (2d)

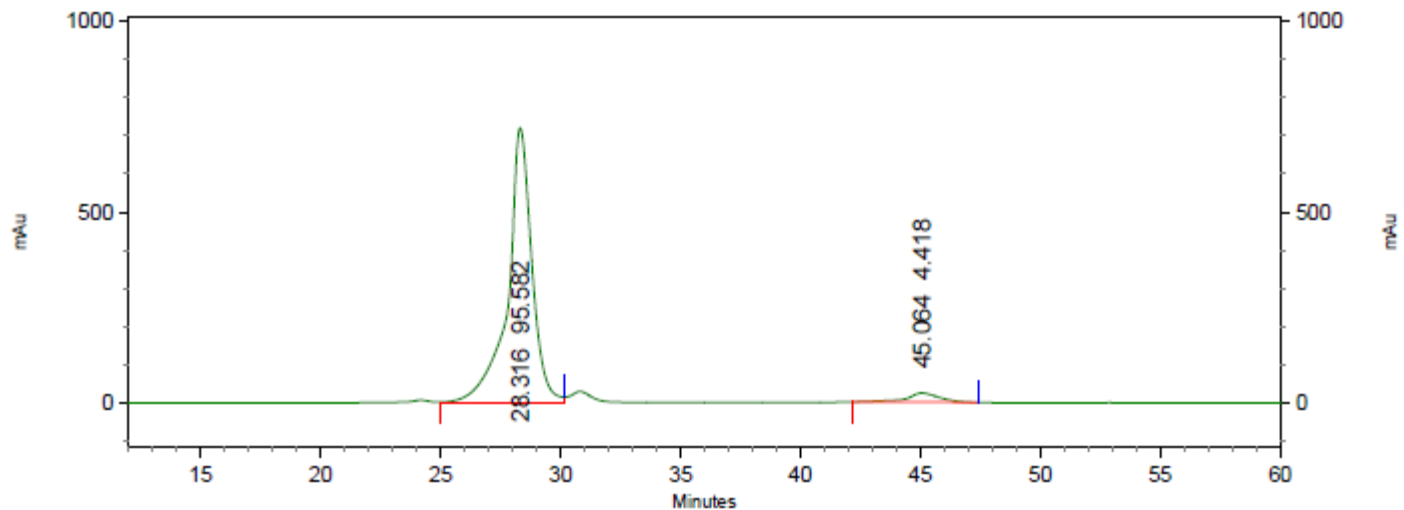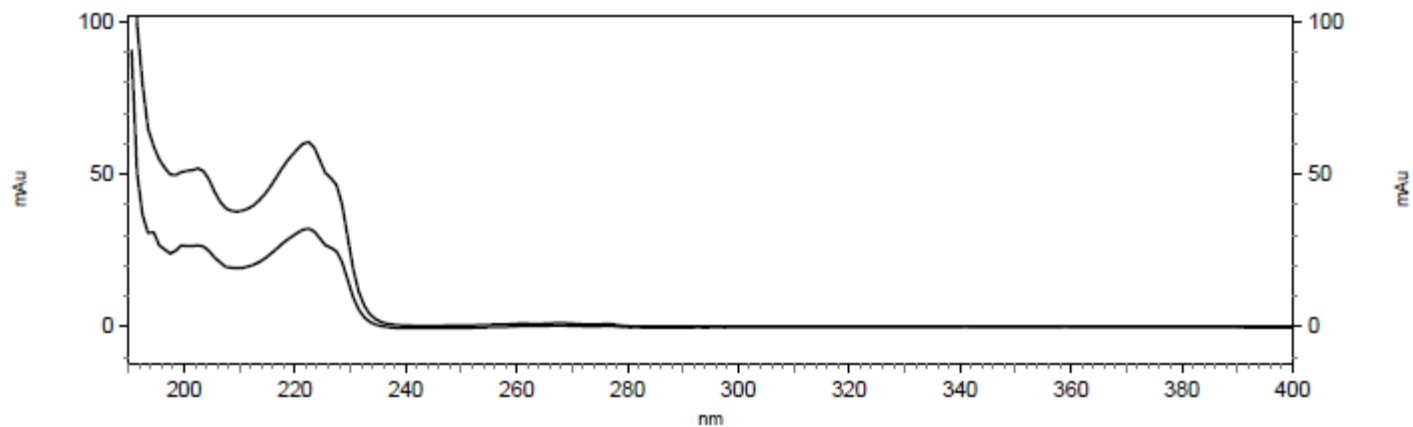

11: 223 nm, 4 nm Results

| Pk #   | Retention Time | Area Percent |
|--------|----------------|--------------|
| 1      | 28.316         | 95.582       |
| 2      | 45.064         | 4.418        |
| Totals |                | 100.000      |

methyl 3-(3,5-dichlorophenyl)tetrahydrothiophene-2-carboxylate 1,1-dioxide (**2e**)

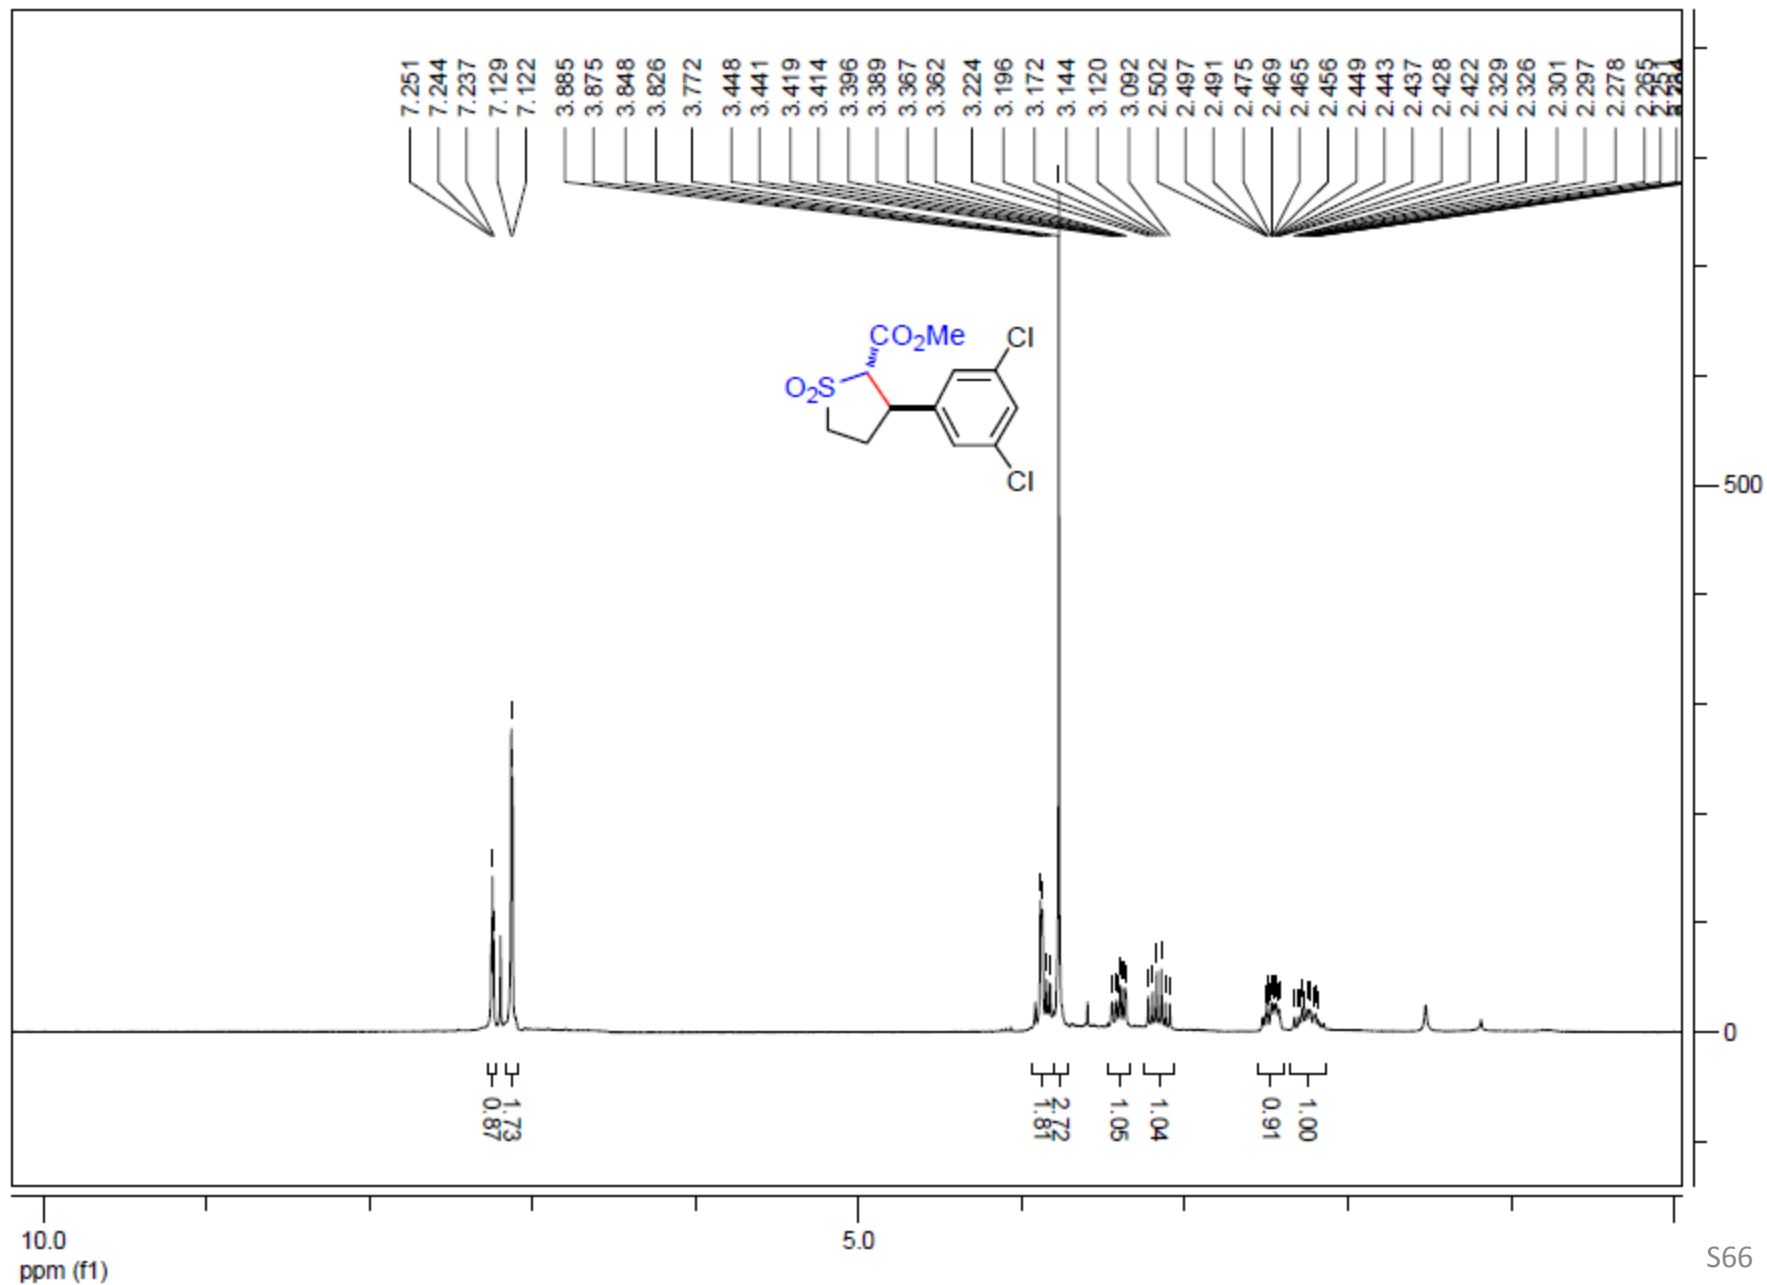

methyl 3-(3,5-dichlorophenyl)tetrahydrothiophene-2-carboxylate 1,1-dioxide (**2e**)

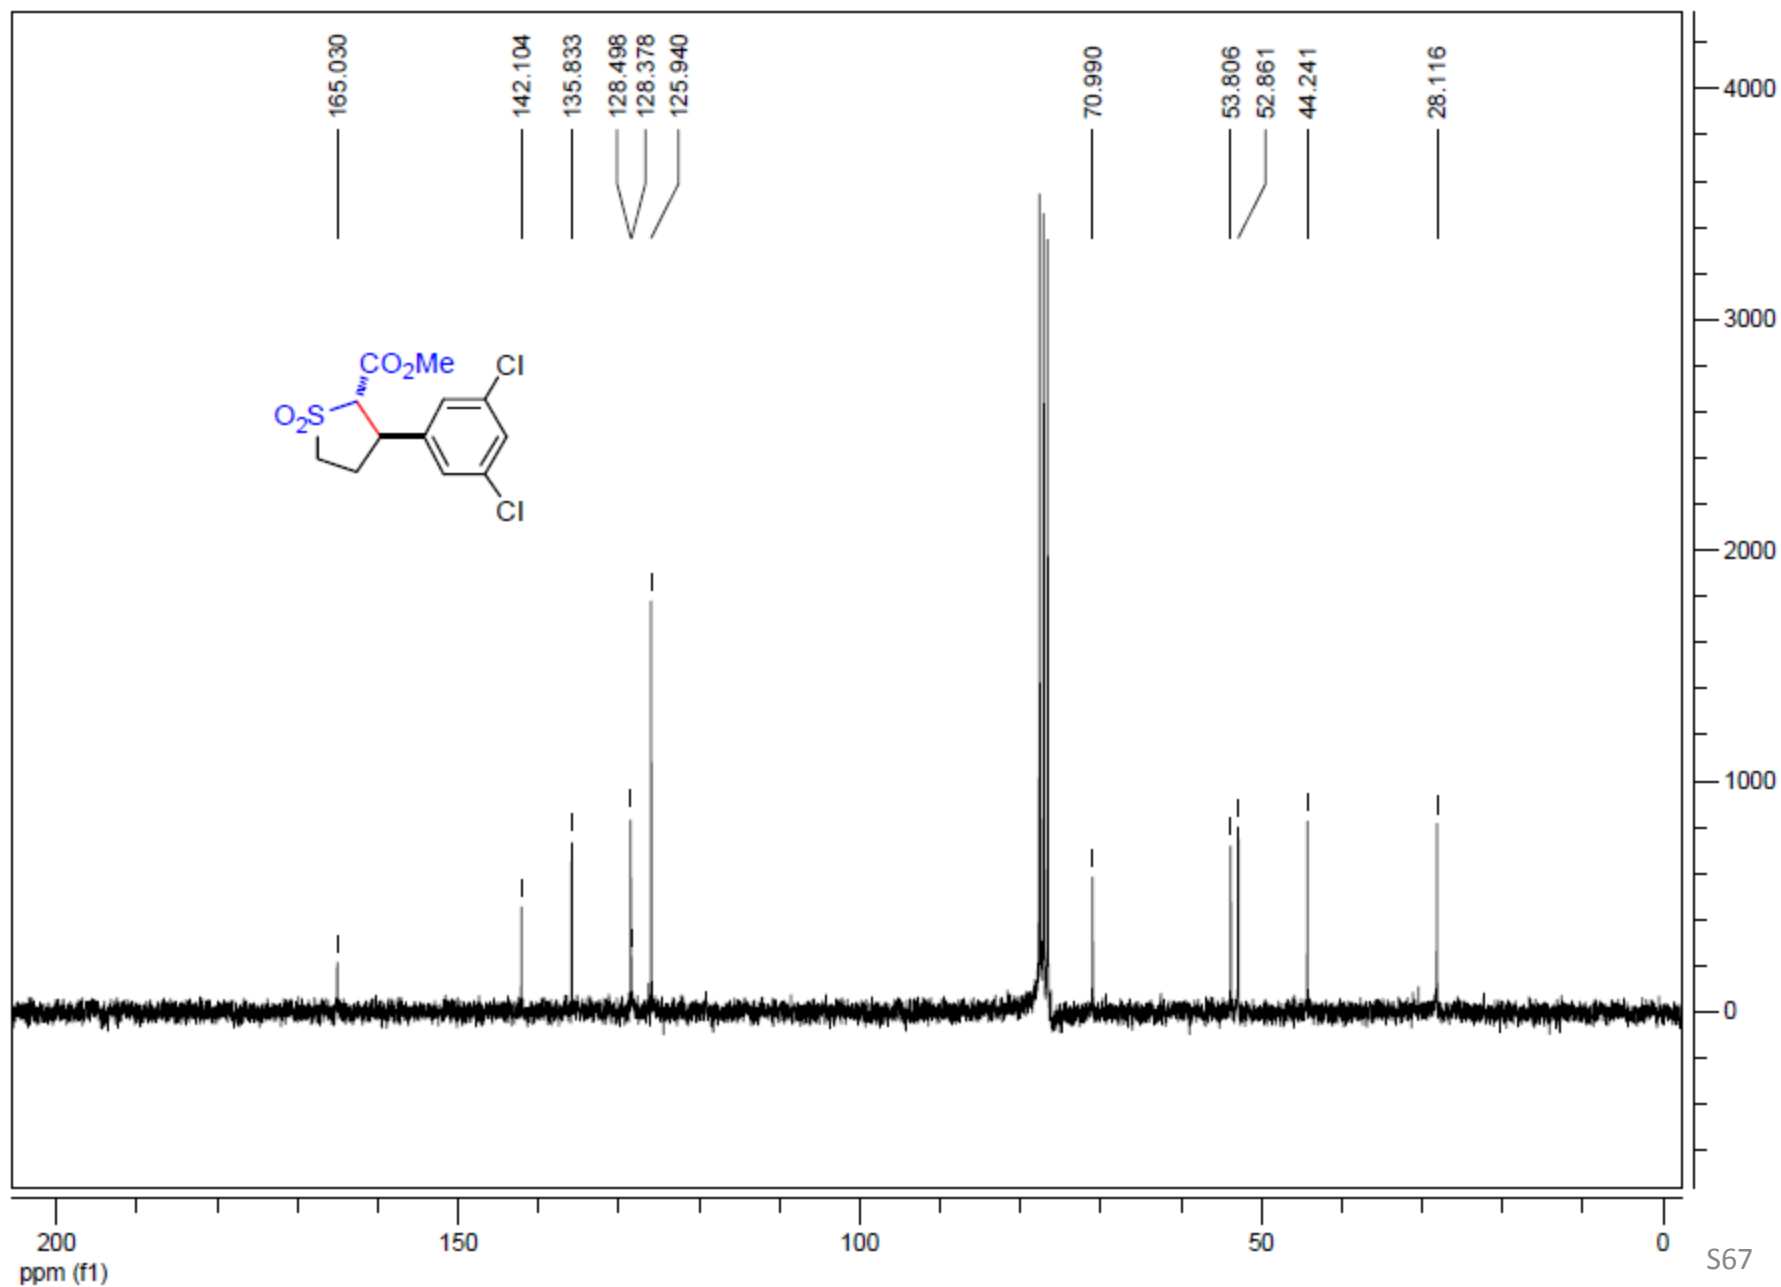



# methyl 3-(3,5-dichlorophenyl)tetrahydrothiophene-2-carboxylate 1,1-dioxide (2e)

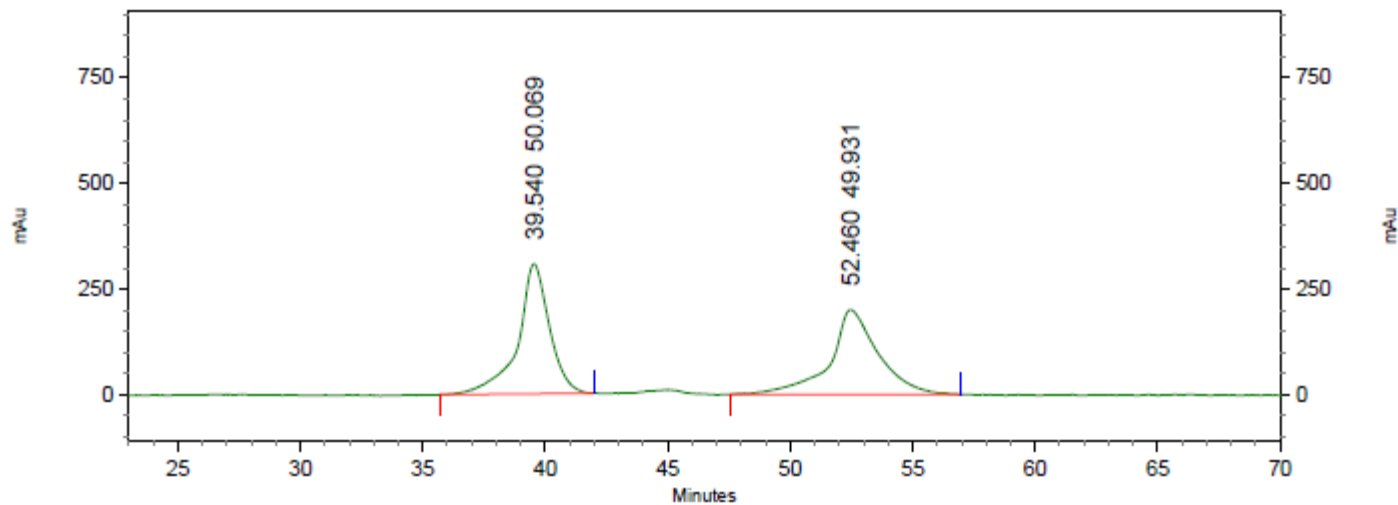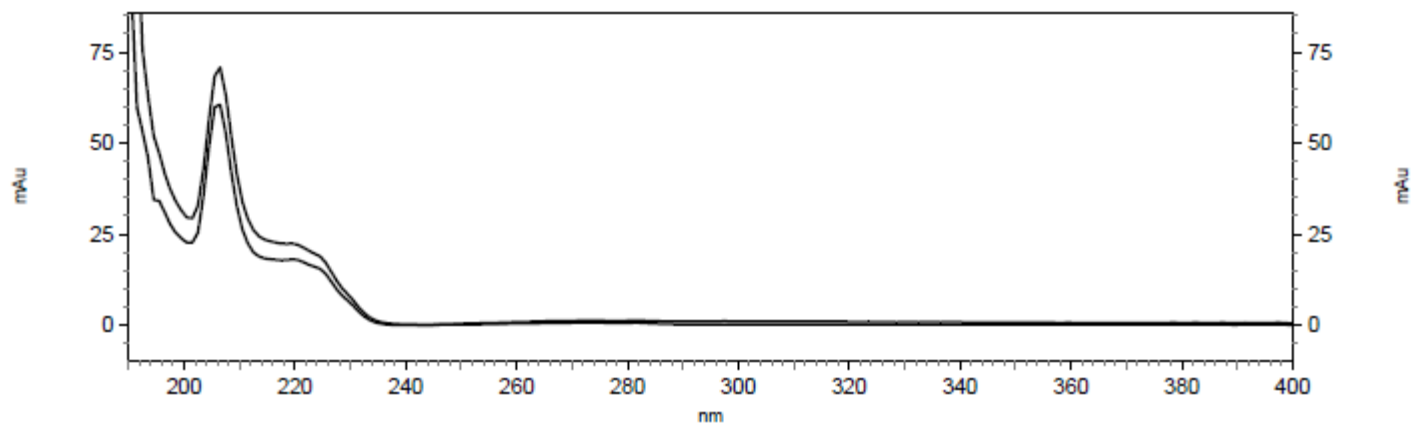

9: 210 nm, 4 nm Results

| Pk #   | Retention Time | Area Percent |
|--------|----------------|--------------|
| 1      | 39.540         | 50.069       |
| 2      | 52.460         | 49.931       |
| Totals |                | 100.000      |

# methyl 3-(3,5-dichlorophenyl)tetrahydrothiophene-2-carboxylate 1,1-dioxide (2e)

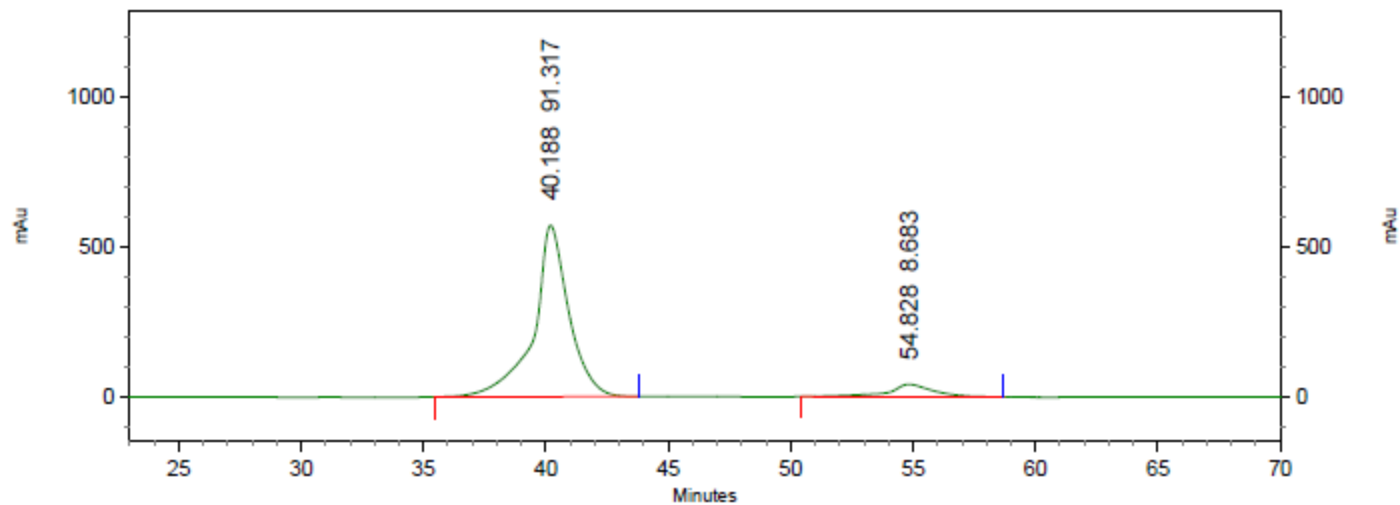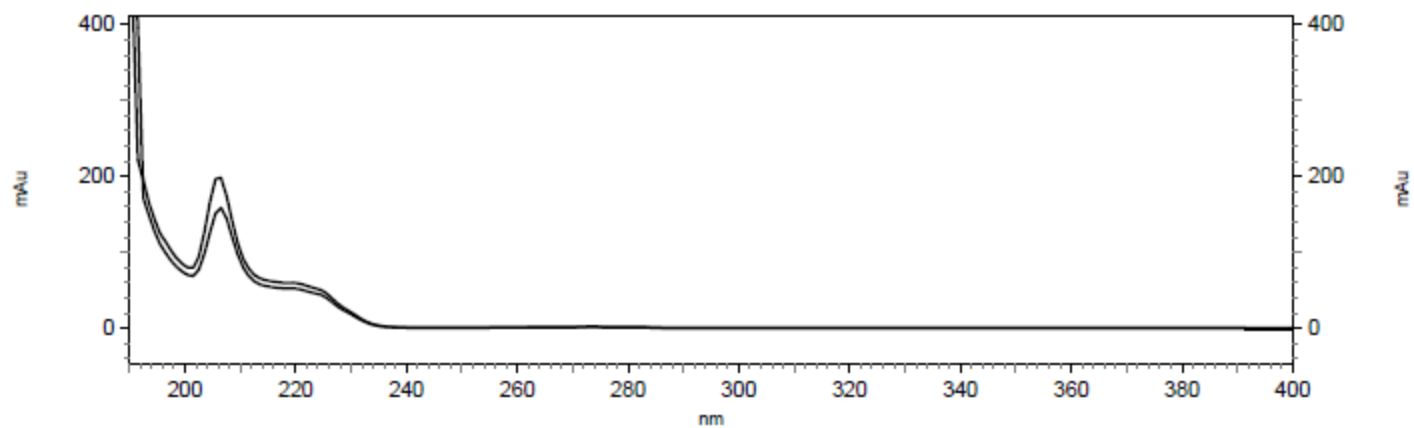

9: 210 nm, 4 nm Results

| Pk #   | Retention Time | Area Percent |
|--------|----------------|--------------|
| 1      | 40.188         | 91.317       |
| 2      | 54.828         | 8.683        |
| Totals |                | 100.000      |

# methyl 3-(3-bromophenyl)tetrahydrothiophene-2-carboxylate 1,1-dioxide (**2f**)

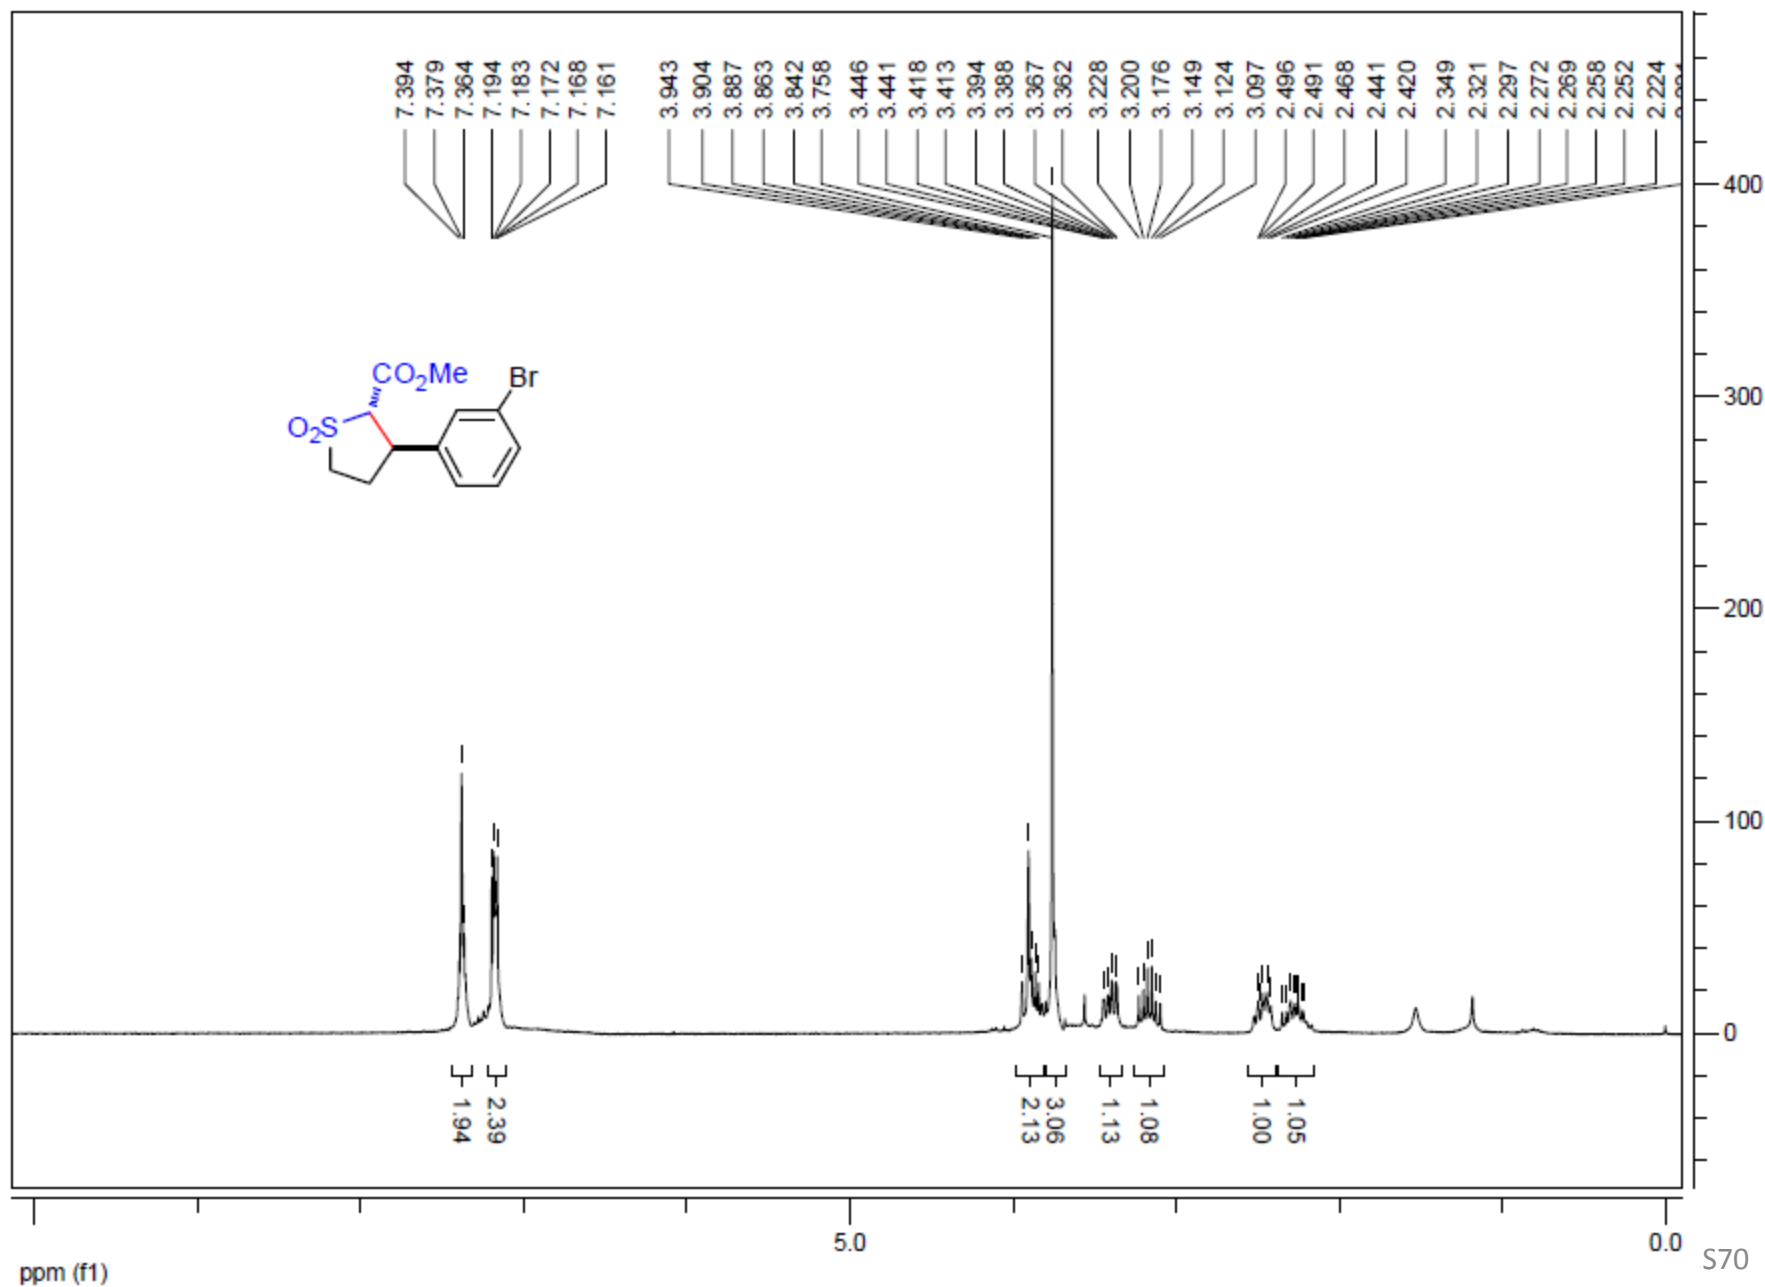

methyl 3-(3-bromophenyl)tetrahydrothiophene-2-carboxylate 1,1-dioxide (**2f**)

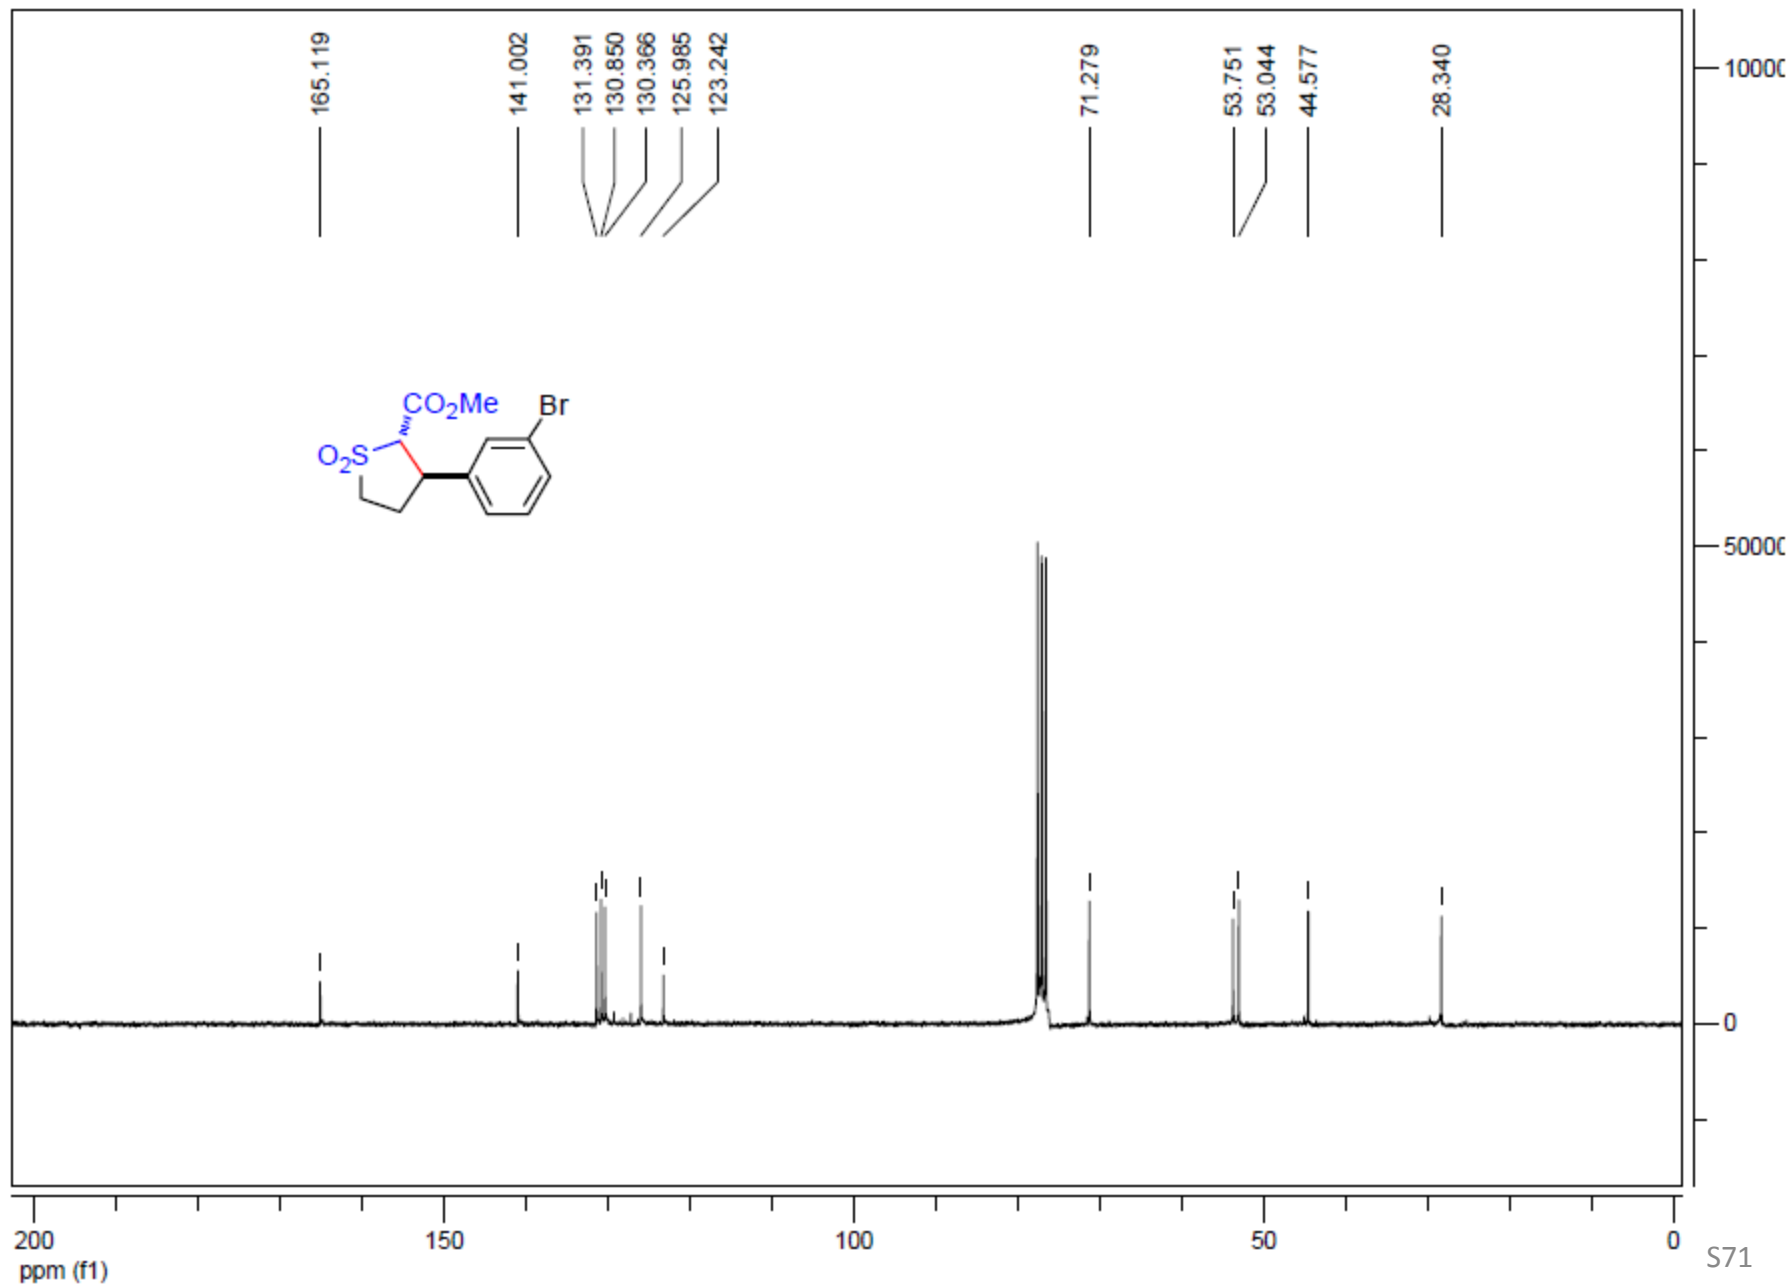

# methyl 3-(3-bromophenyl)tetrahydrothiophene-2-carboxylate 1,1-dioxide (2f)

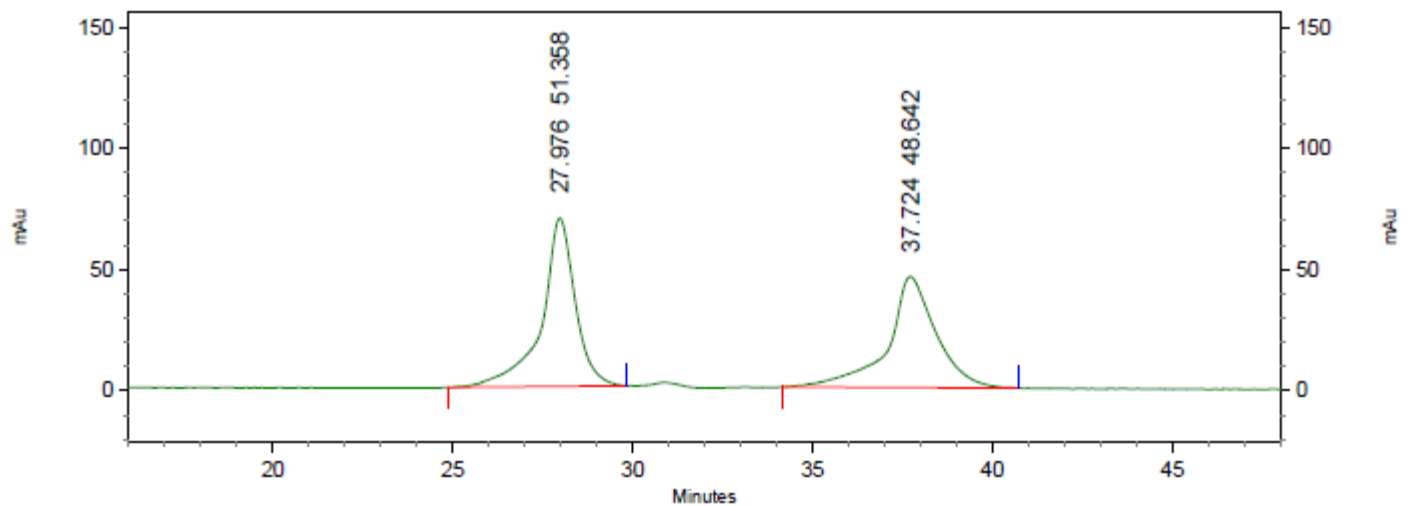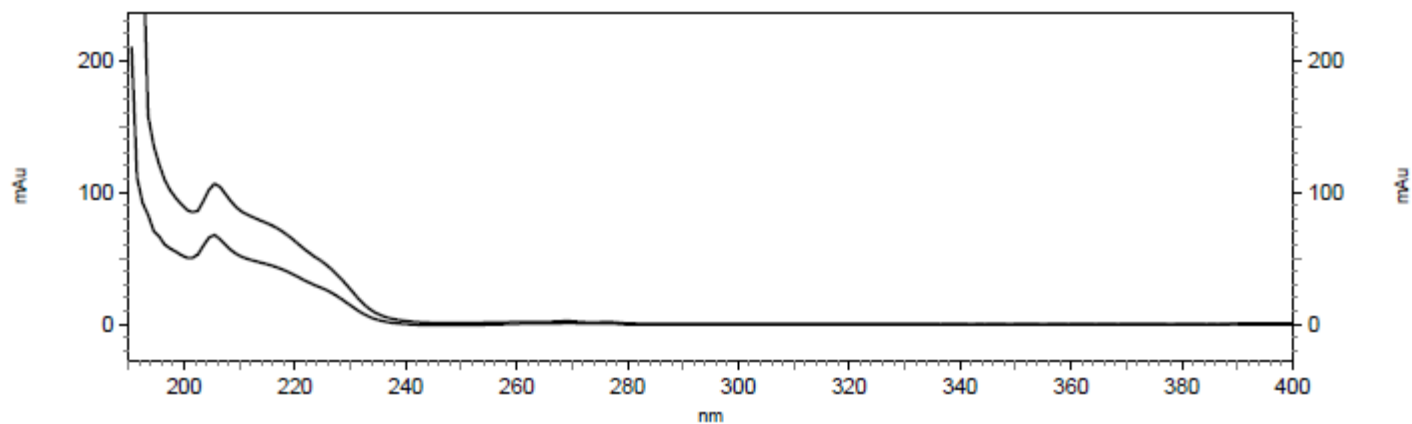

11: 226 nm, 4 nm Results

| Pk #   | Retention Time | Area Percent |
|--------|----------------|--------------|
| 1      | 27.976         | 51.358       |
| 2      | 37.724         | 48.642       |
| Totals |                | 100.000      |

# methyl 3-(3-bromophenyl)tetrahydrothiophene-2-carboxylate 1,1-dioxide (2f)

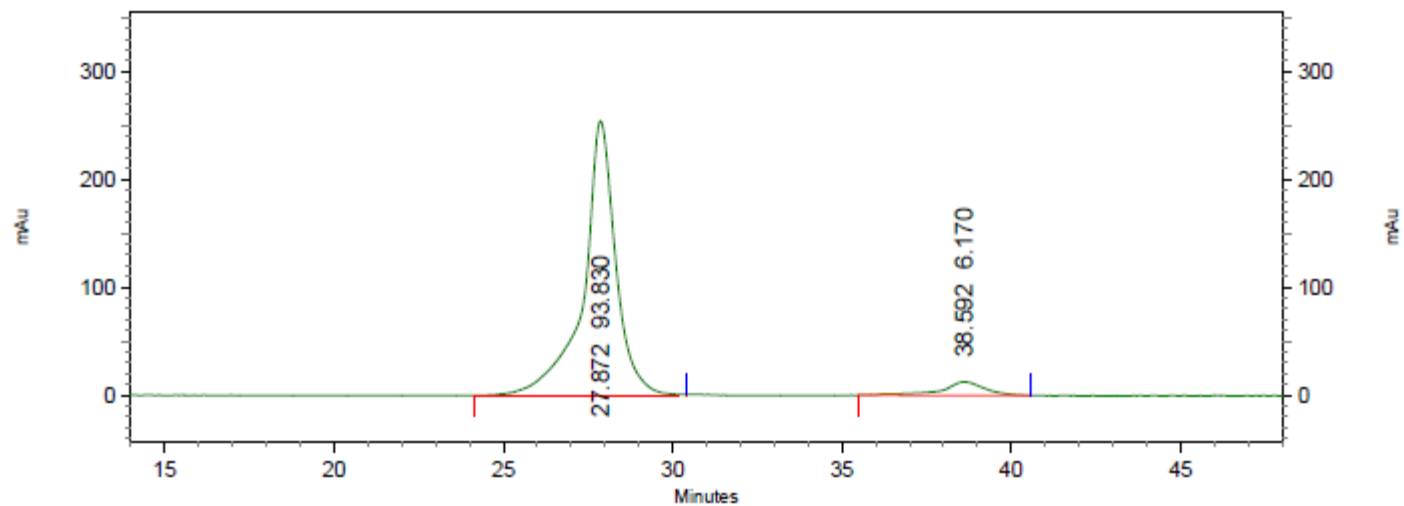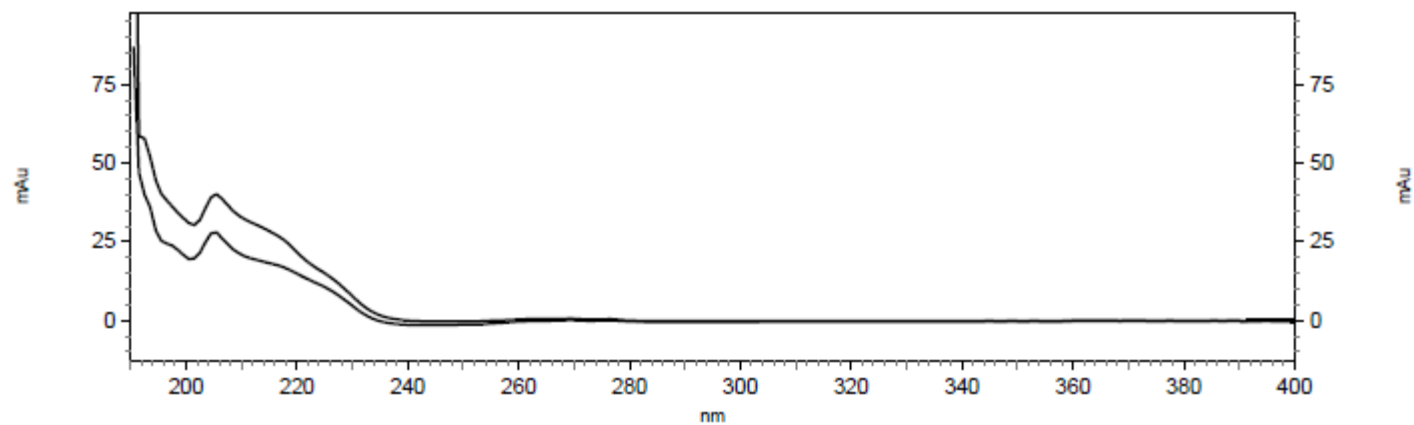

11: 223 nm, 4 nm Results

| Pk #   | Retention Time | Area Percent |
|--------|----------------|--------------|
| 1      | 27.872         | 93.830       |
| 2      | 38.592         | 6.170        |
| Totals |                | 100.000      |

(2S,3R)-methyl 3-phenyltetrahydrothiophene-2-carboxylate 1,1-dioxide (**2g**)

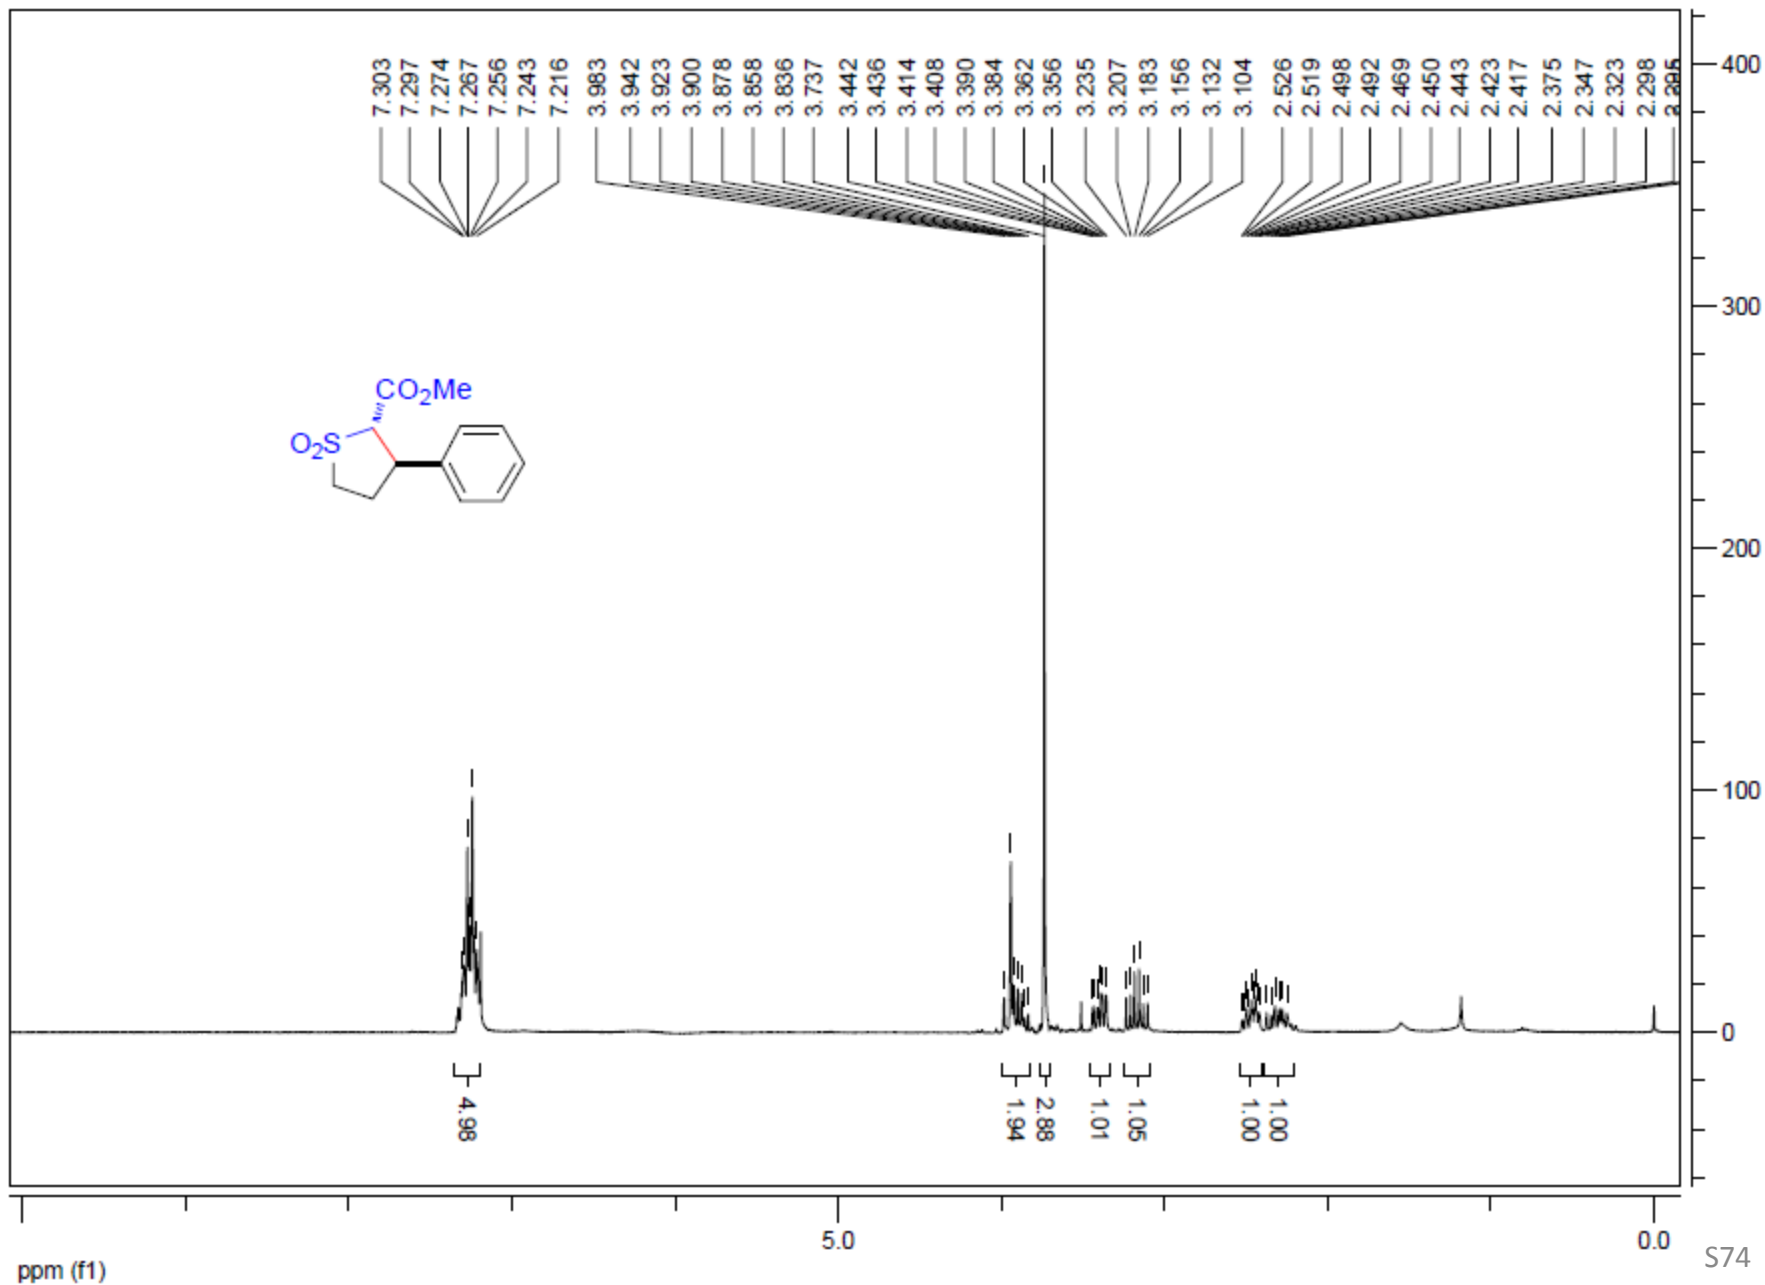

(2S,3R)-methyl 3-phenyltetrahydrothiophene-2-carboxylate 1,1-dioxide (2g)

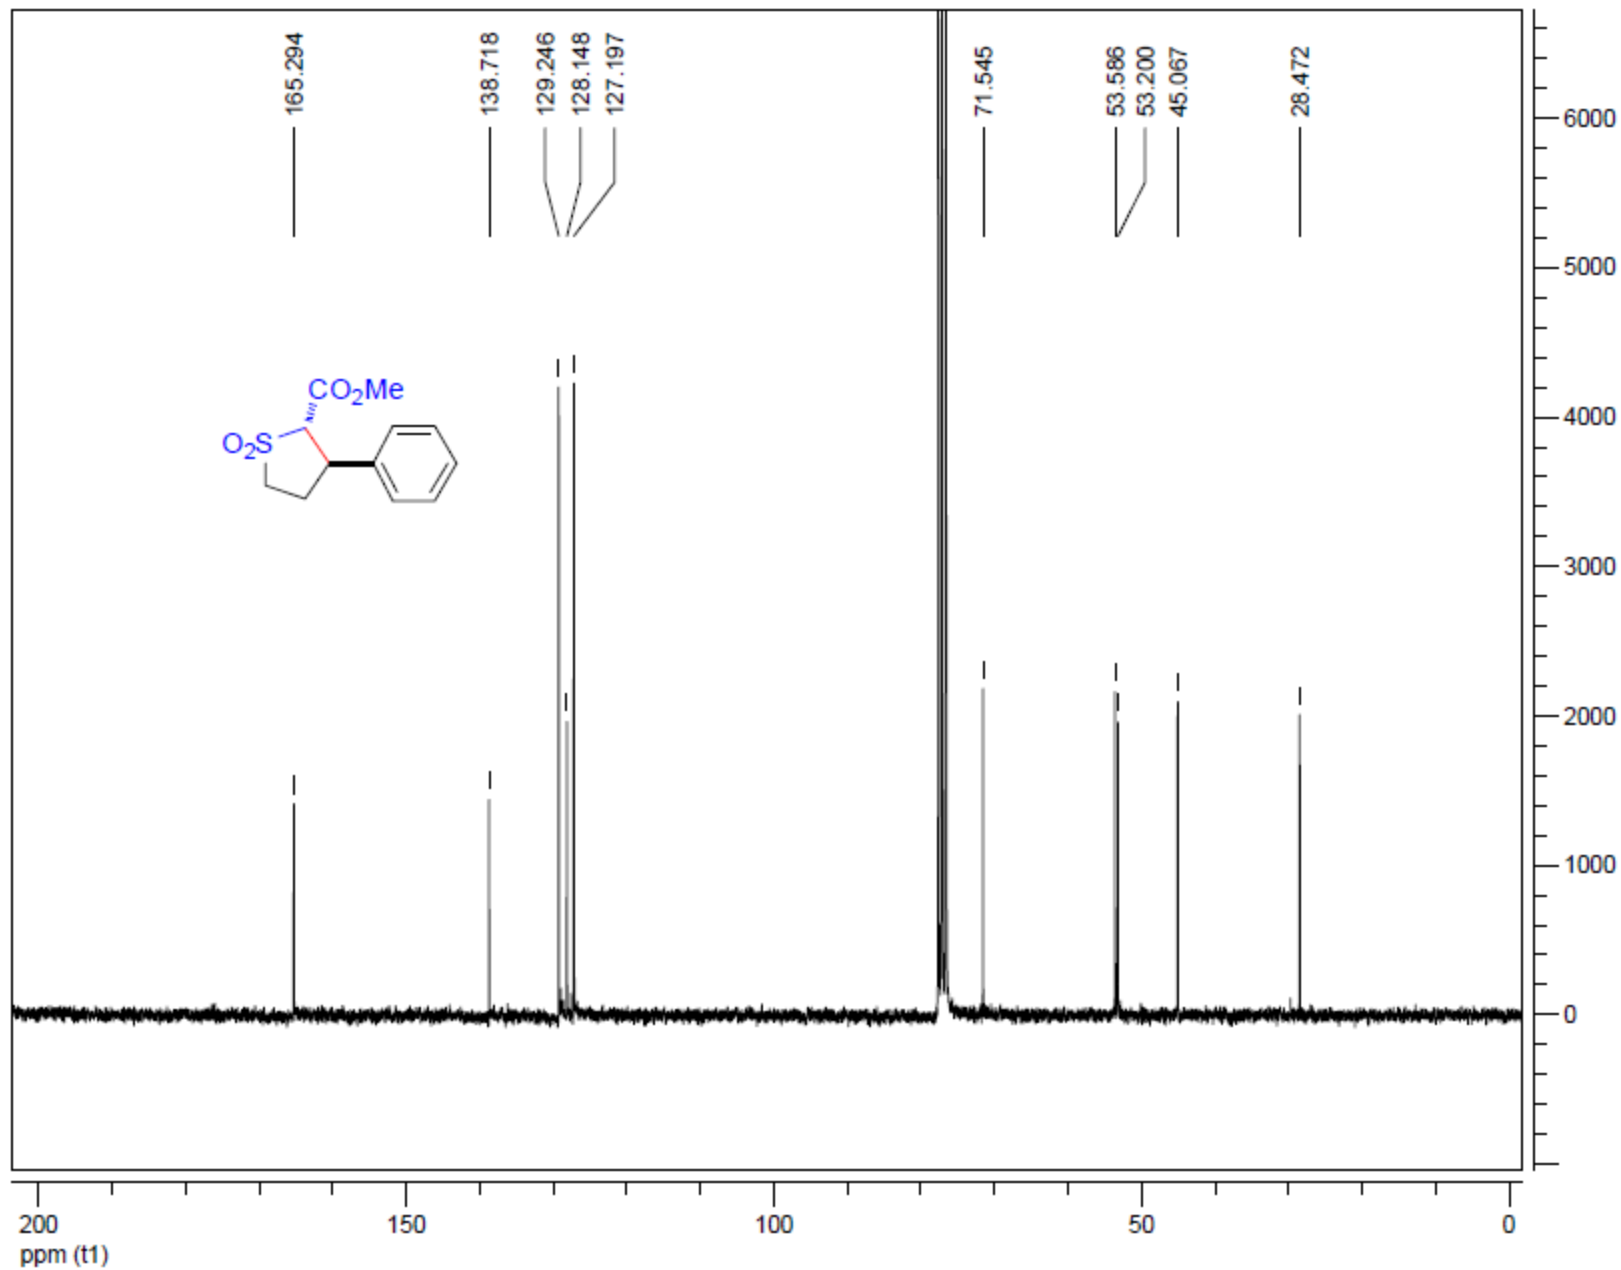



# (2S,3R)-methyl 3-phenyltetrahydrothiophene-2-carboxylate 1,1-dioxide (2g)

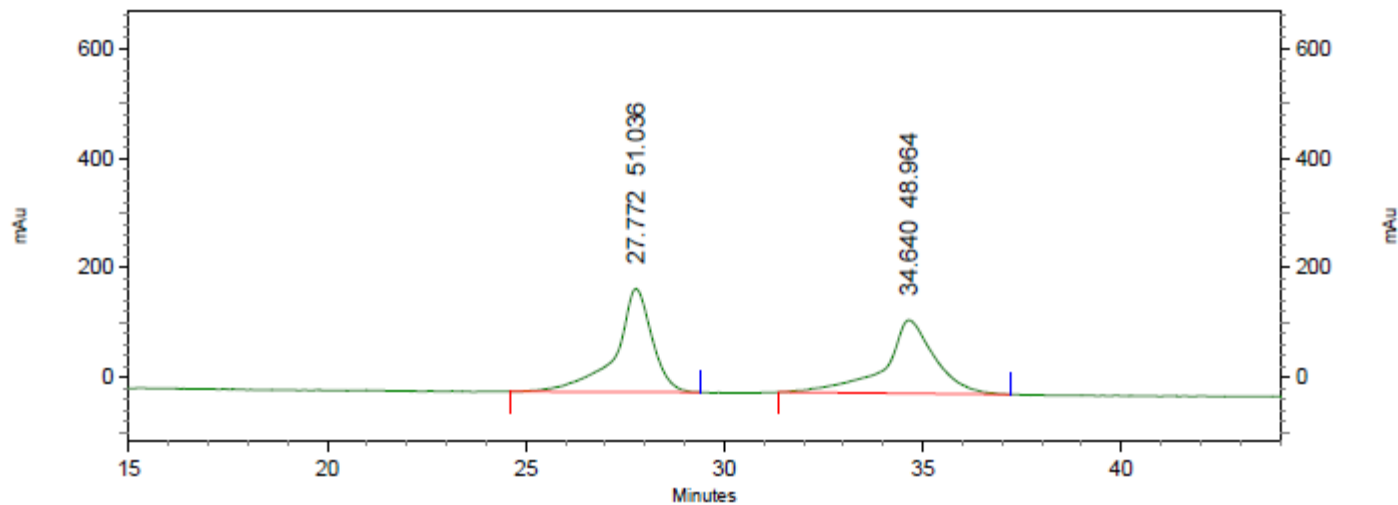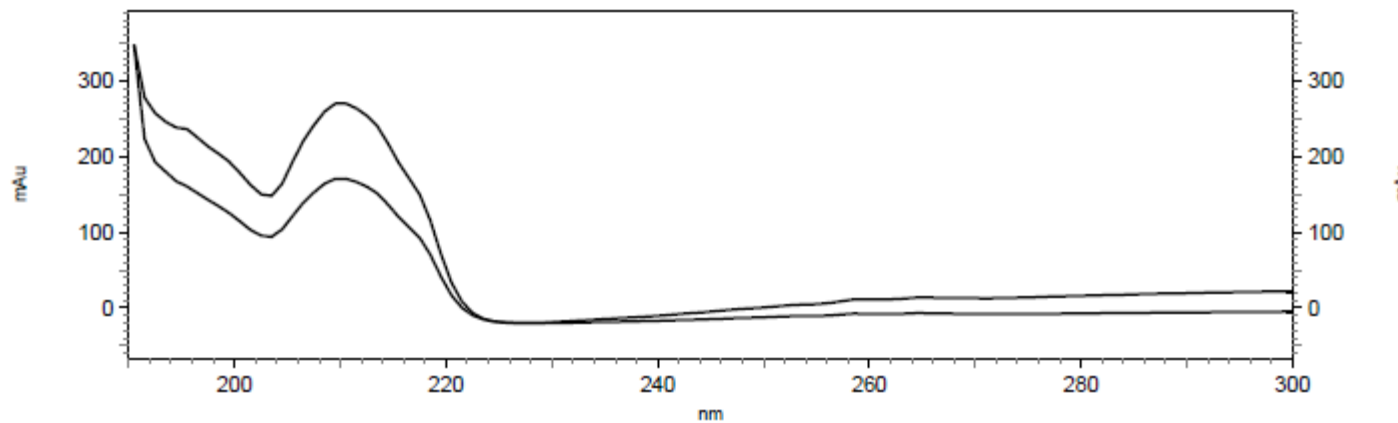

4: 215 nm, 4 nm Results

| Pk #   | Retention Time | Area Percent |
|--------|----------------|--------------|
| 1      | 27.772         | 51.036       |
| 2      | 34.640         | 48.964       |
| Totals |                | 100.000      |

# (2S,3R)-methyl 3-phenyltetrahydrothiophene-2-carboxylate 1,1-dioxide (2g)

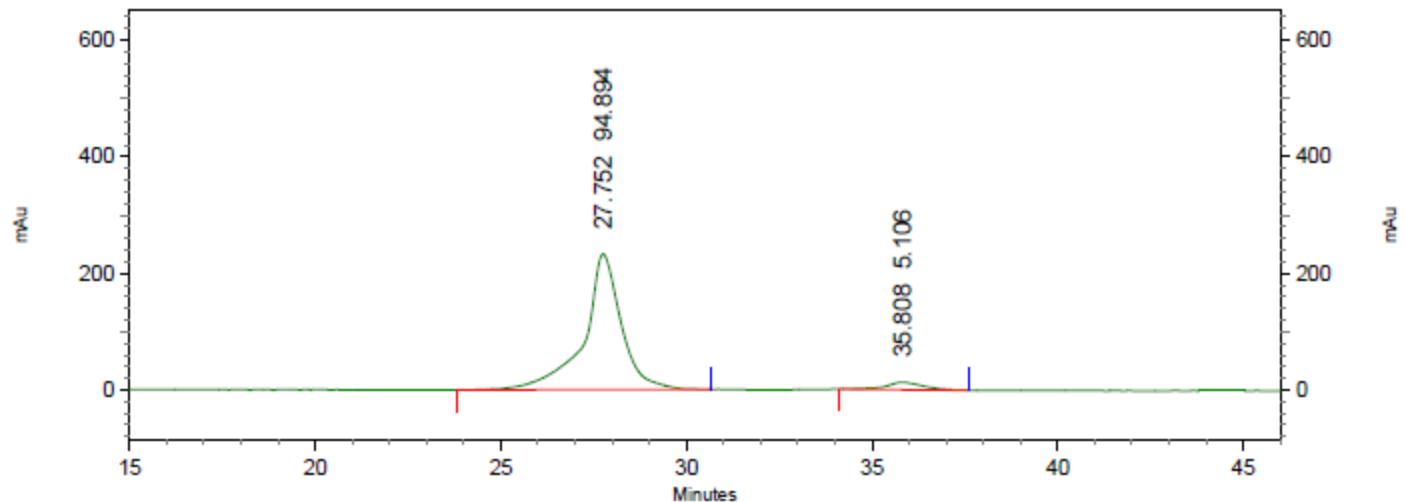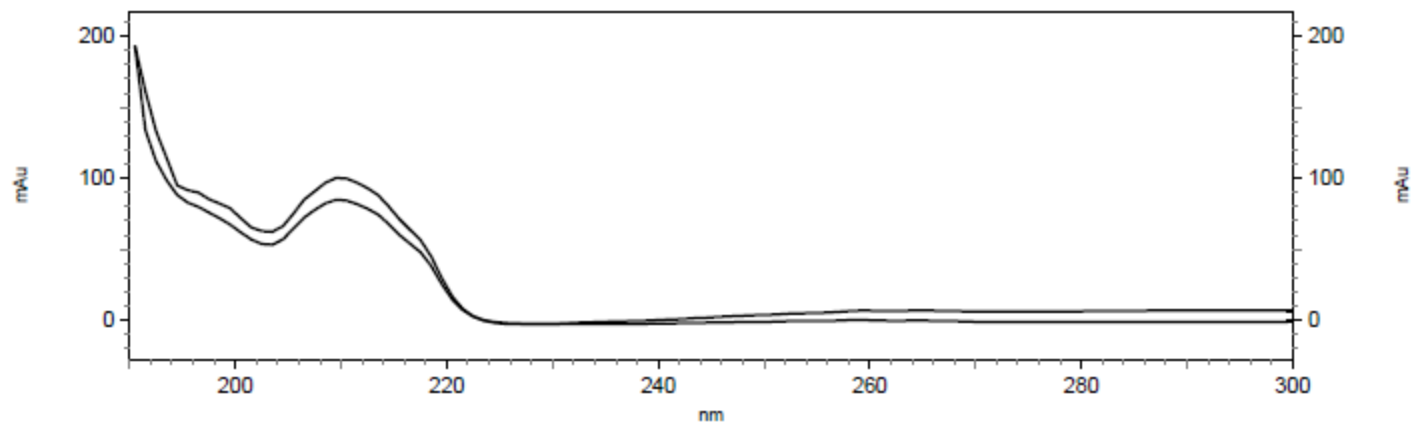

4: 215 nm, 4 nm Results

| Pk #   | Retention Time | Area Percent |
|--------|----------------|--------------|
| 1      | 27.752         | 94.894       |
| 2      | 35.808         | 5.106        |
| Totals |                | 100.000      |

# methyl 3-(p-tolyl)tetrahydrothiophene-2-carboxylate 1,1-dioxide (**2h**)

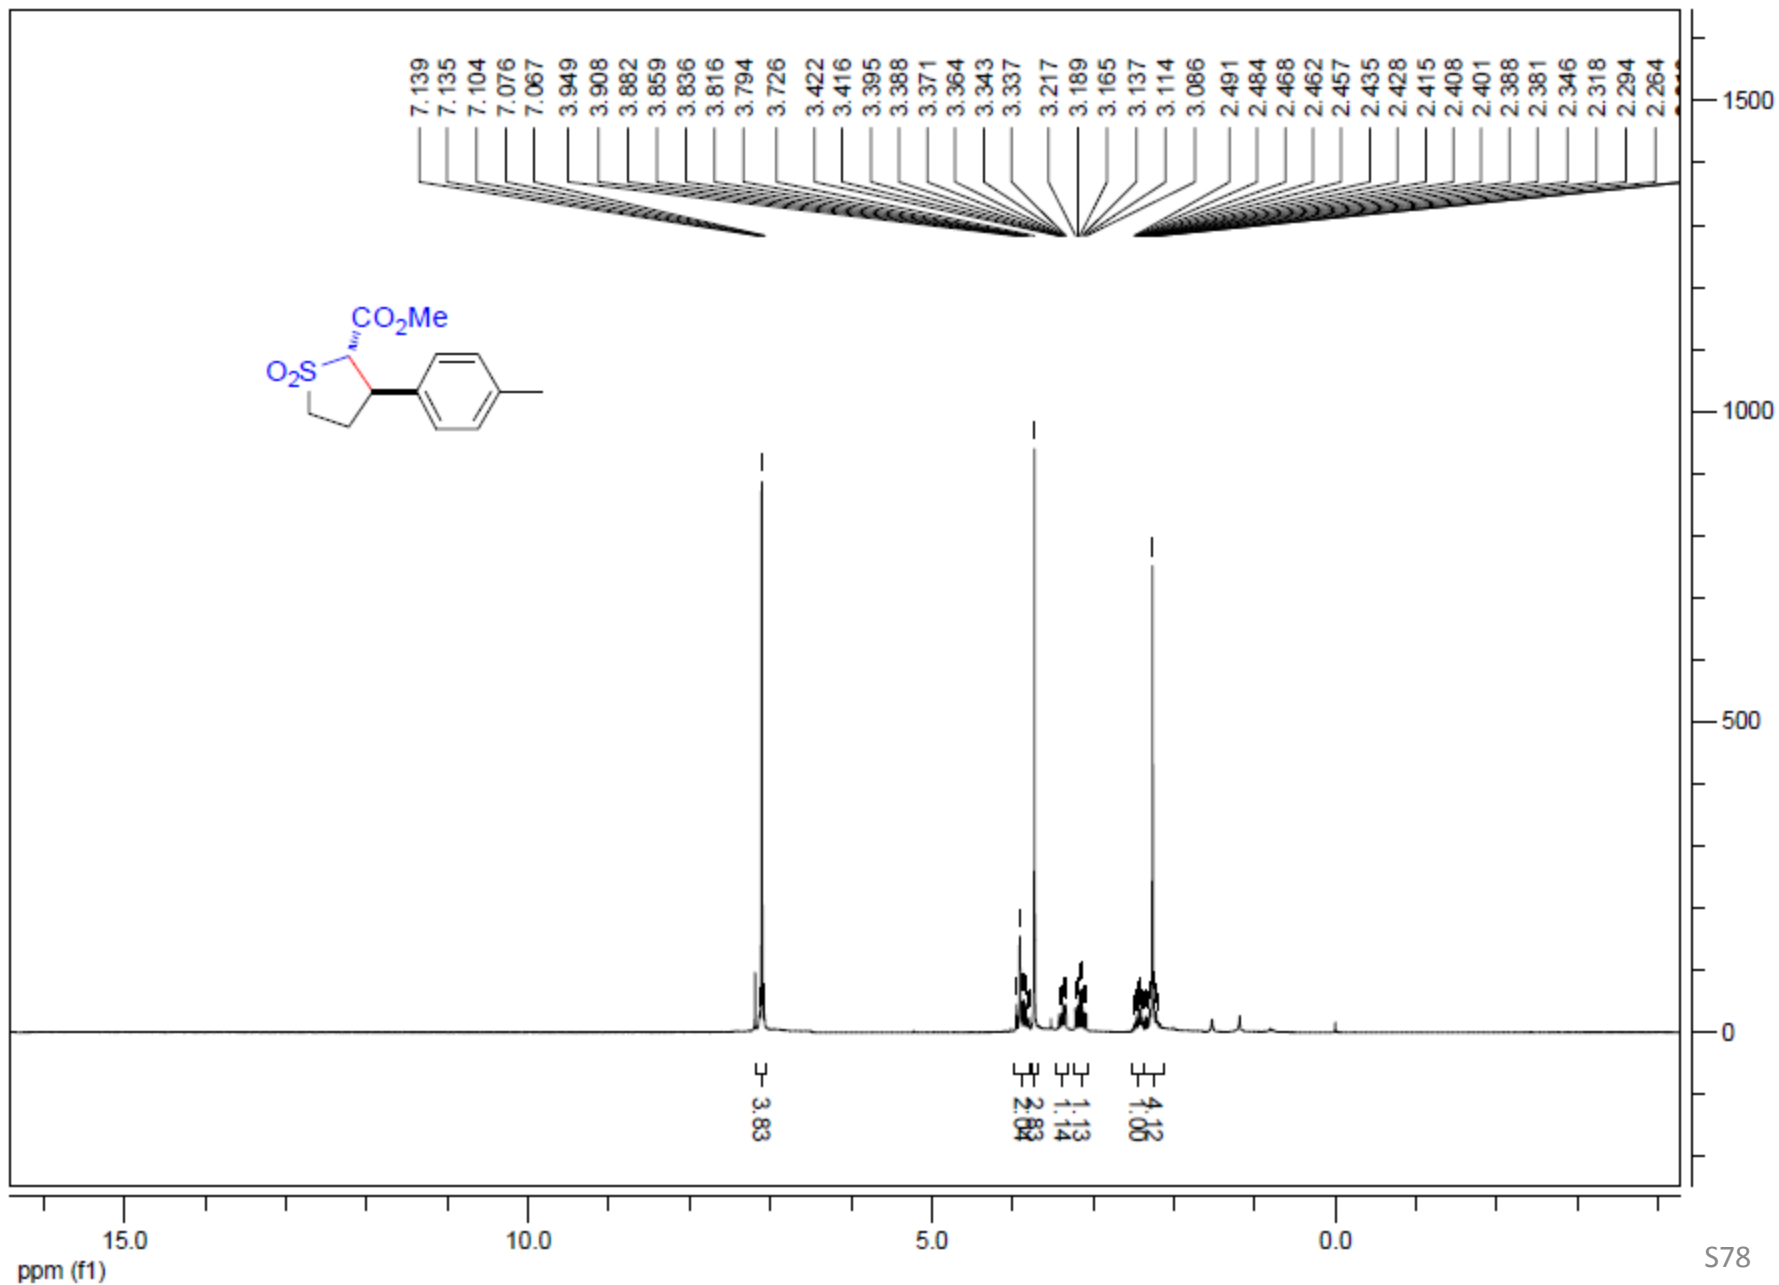

# methyl 3-(p-tolyl)tetrahydrothiophene-2-carboxylate 1,1-dioxide (**2h**)

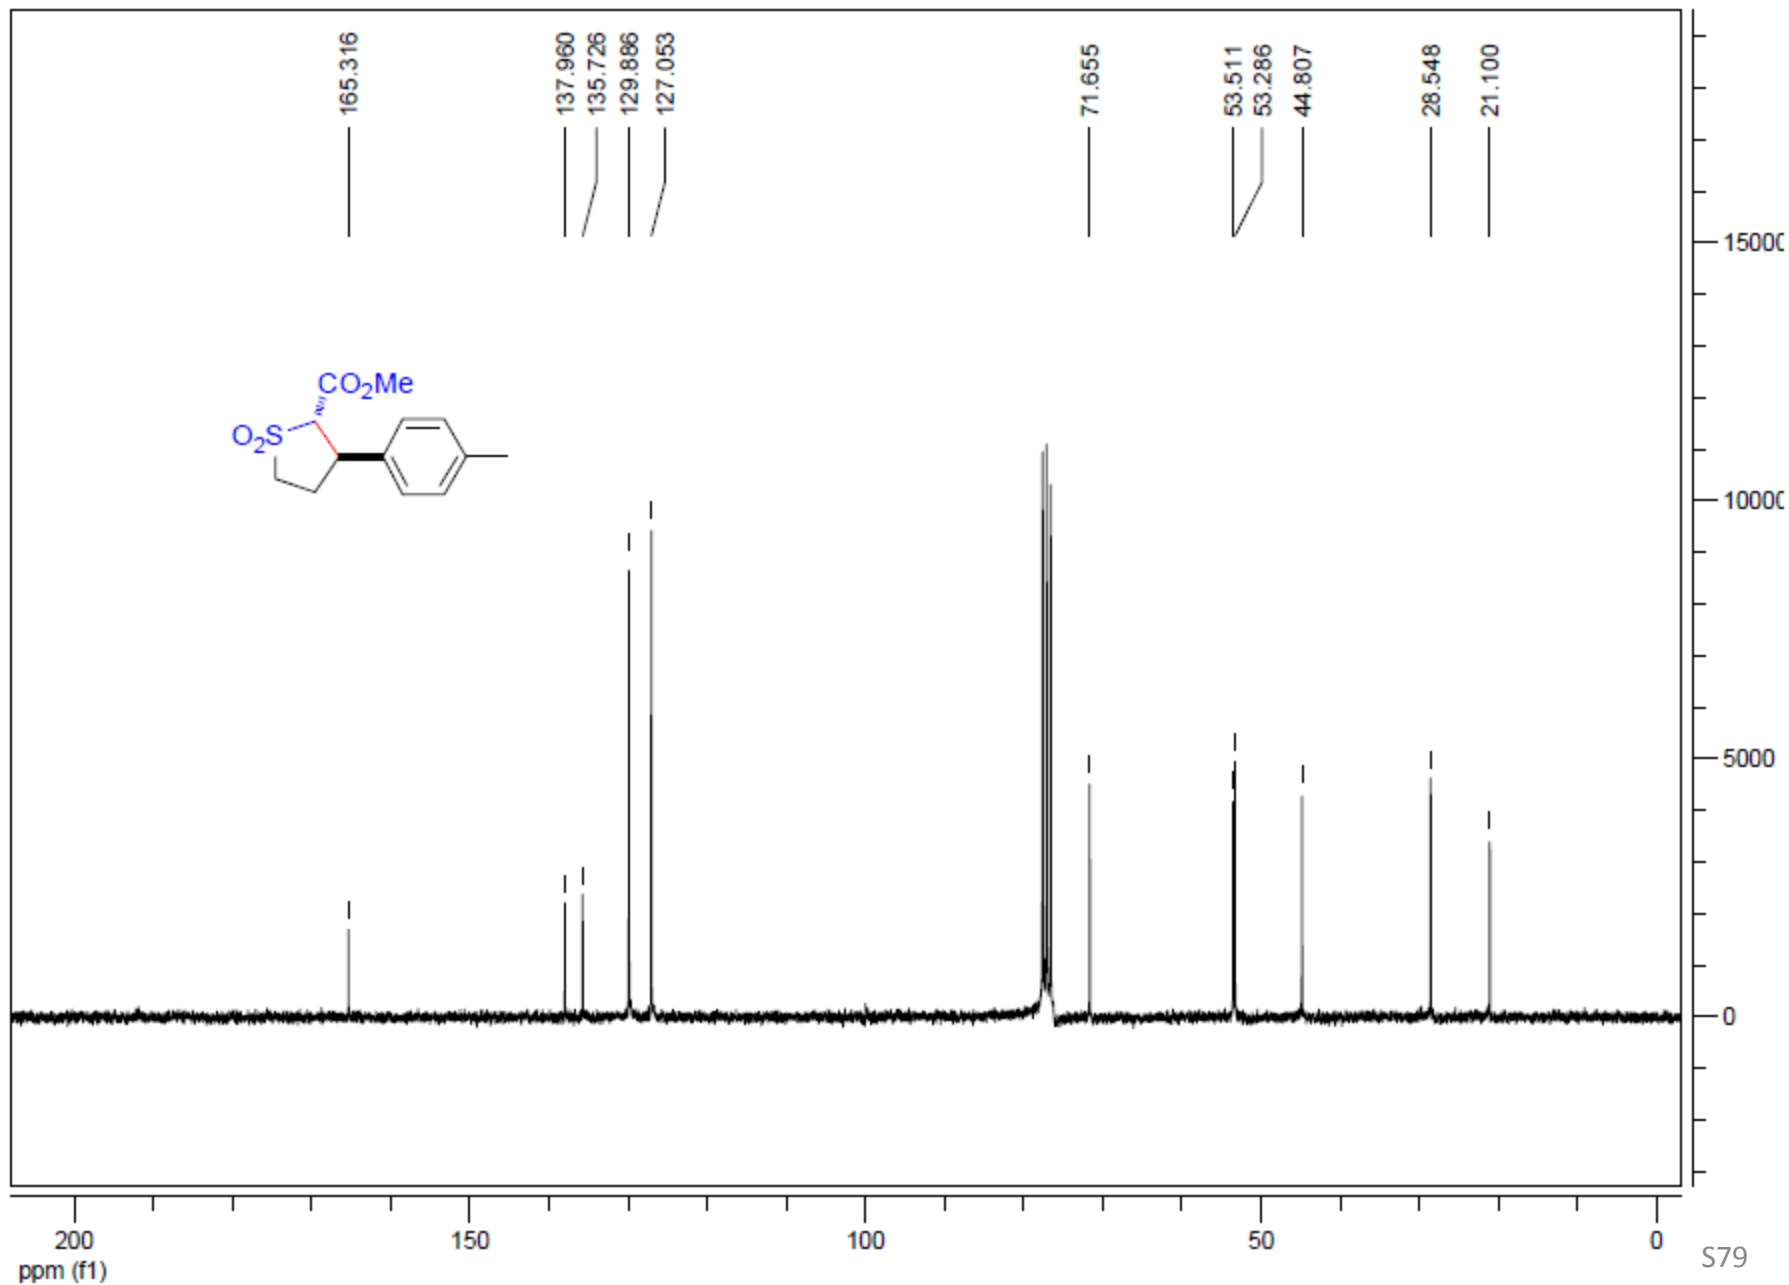

# methyl 3-(p-tolyl)tetrahydrothiophene-2-carboxylate 1,1-dioxide (2h)

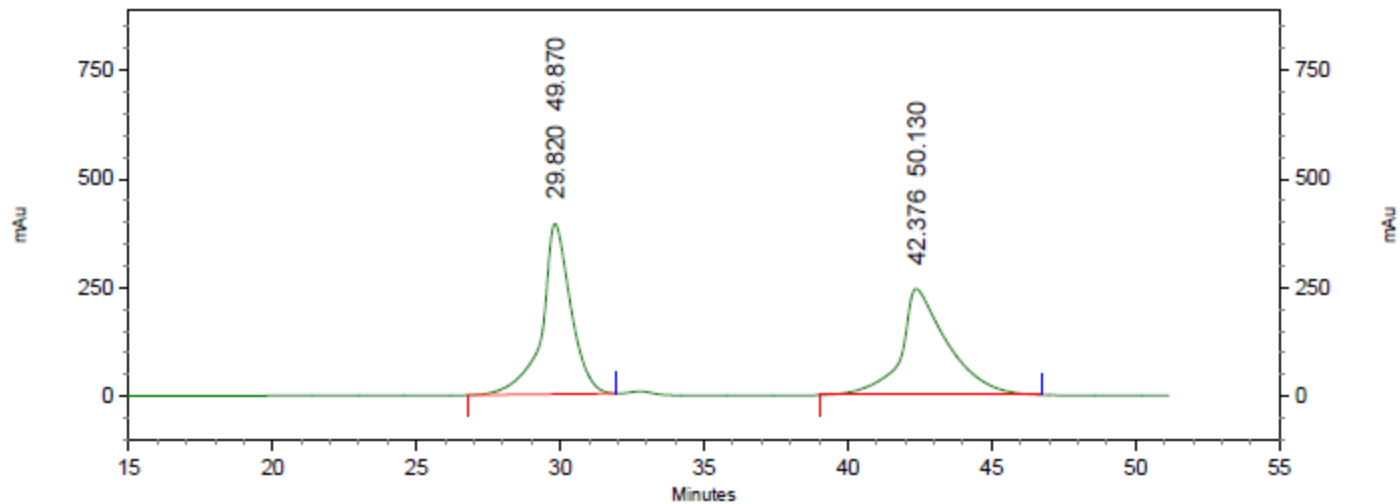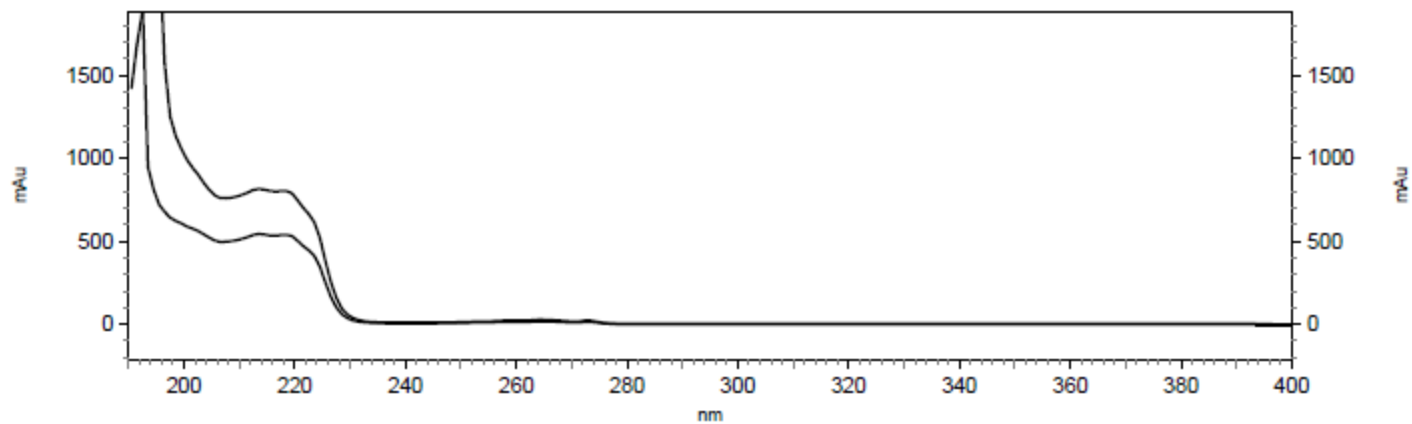

9: 218 nm, 4 nm Results

| Pk #   | Retention Time | Area Percent |
|--------|----------------|--------------|
| 1      | 29.820         | 49.870       |
| 2      | 42.376         | 50.130       |
| Totals |                | 100.000      |

# methyl 3-(p-tolyl)tetrahydrothiophene-2-carboxylate 1,1-dioxide (2h)

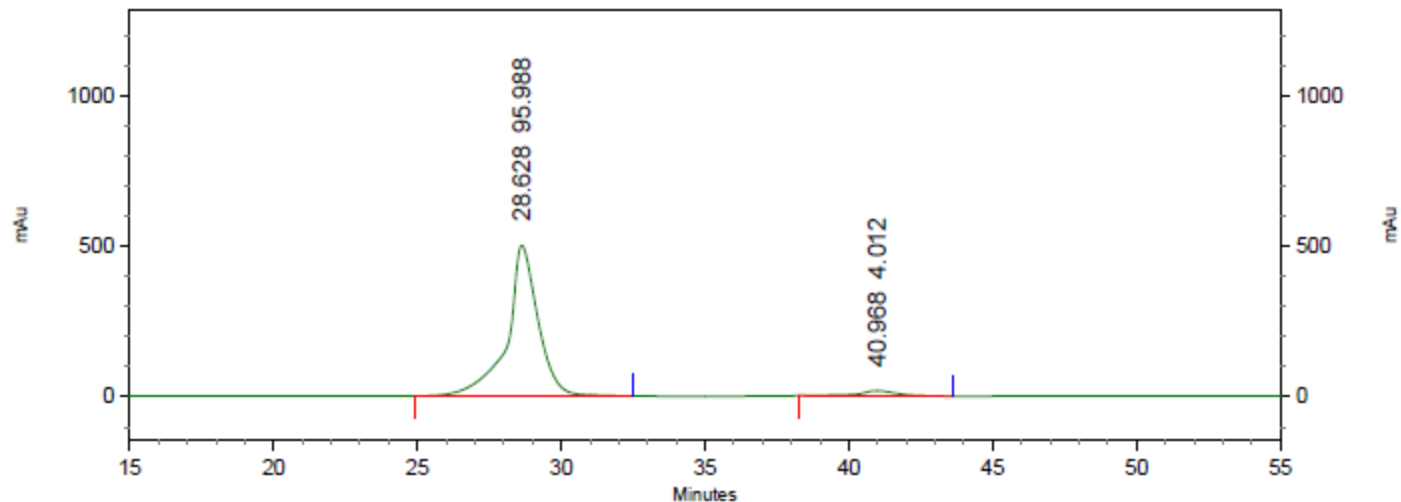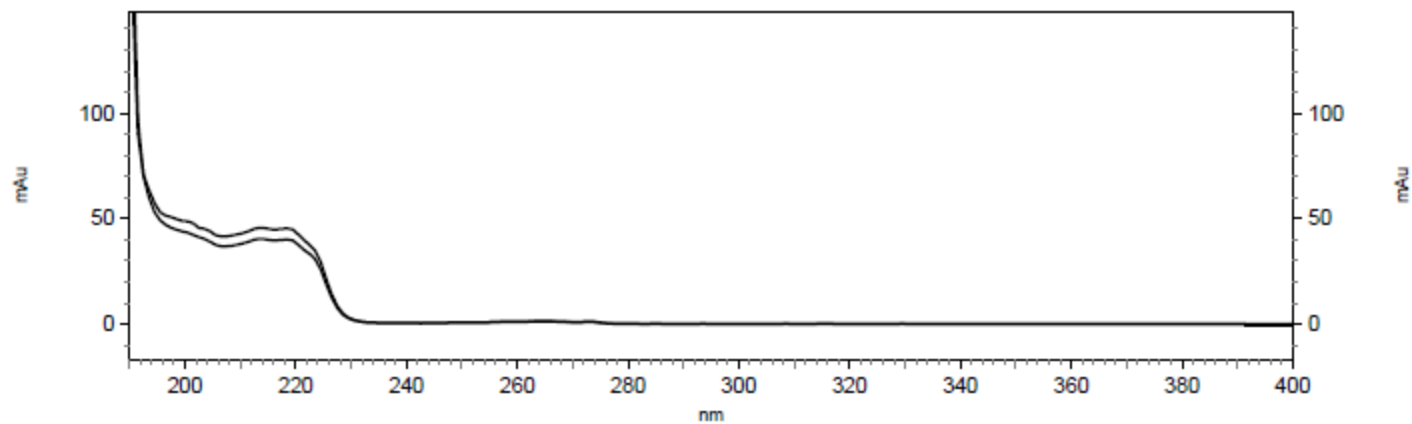

9: 218 nm, 4 nm Results

| Pk #   | Retention Time | Area Percent |
|--------|----------------|--------------|
| 1      | 28.628         | 95.988       |
| 2      | 40.968         | 4.012        |
| Totals |                | 100.000      |

# methyl 3-(4-methoxyphenyl)tetrahydrothiophene-2-carboxylate 1,1-dioxide (2i)

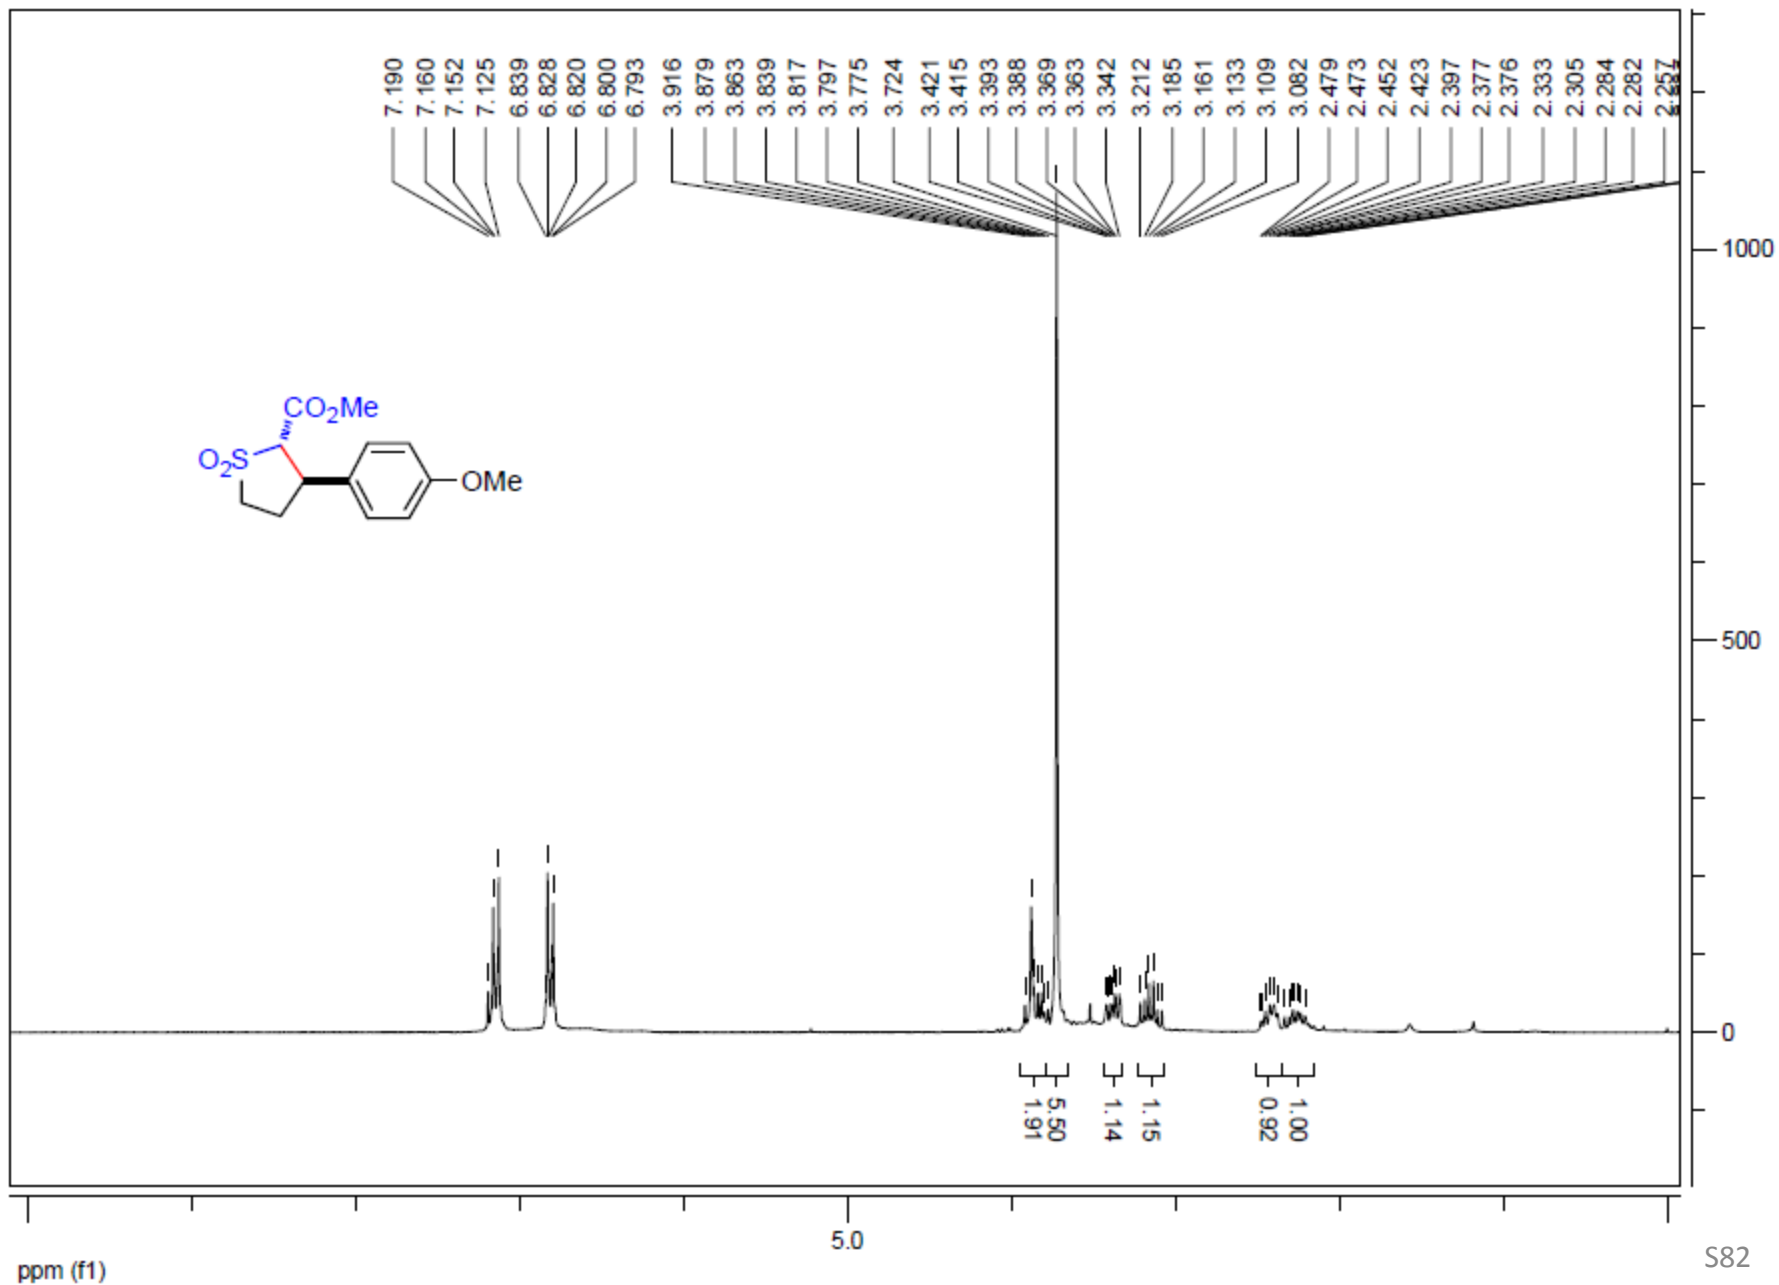

# methyl 3-(4-methoxyphenyl)tetrahydrothiophene-2-carboxylate 1,1-dioxide (**2i**)

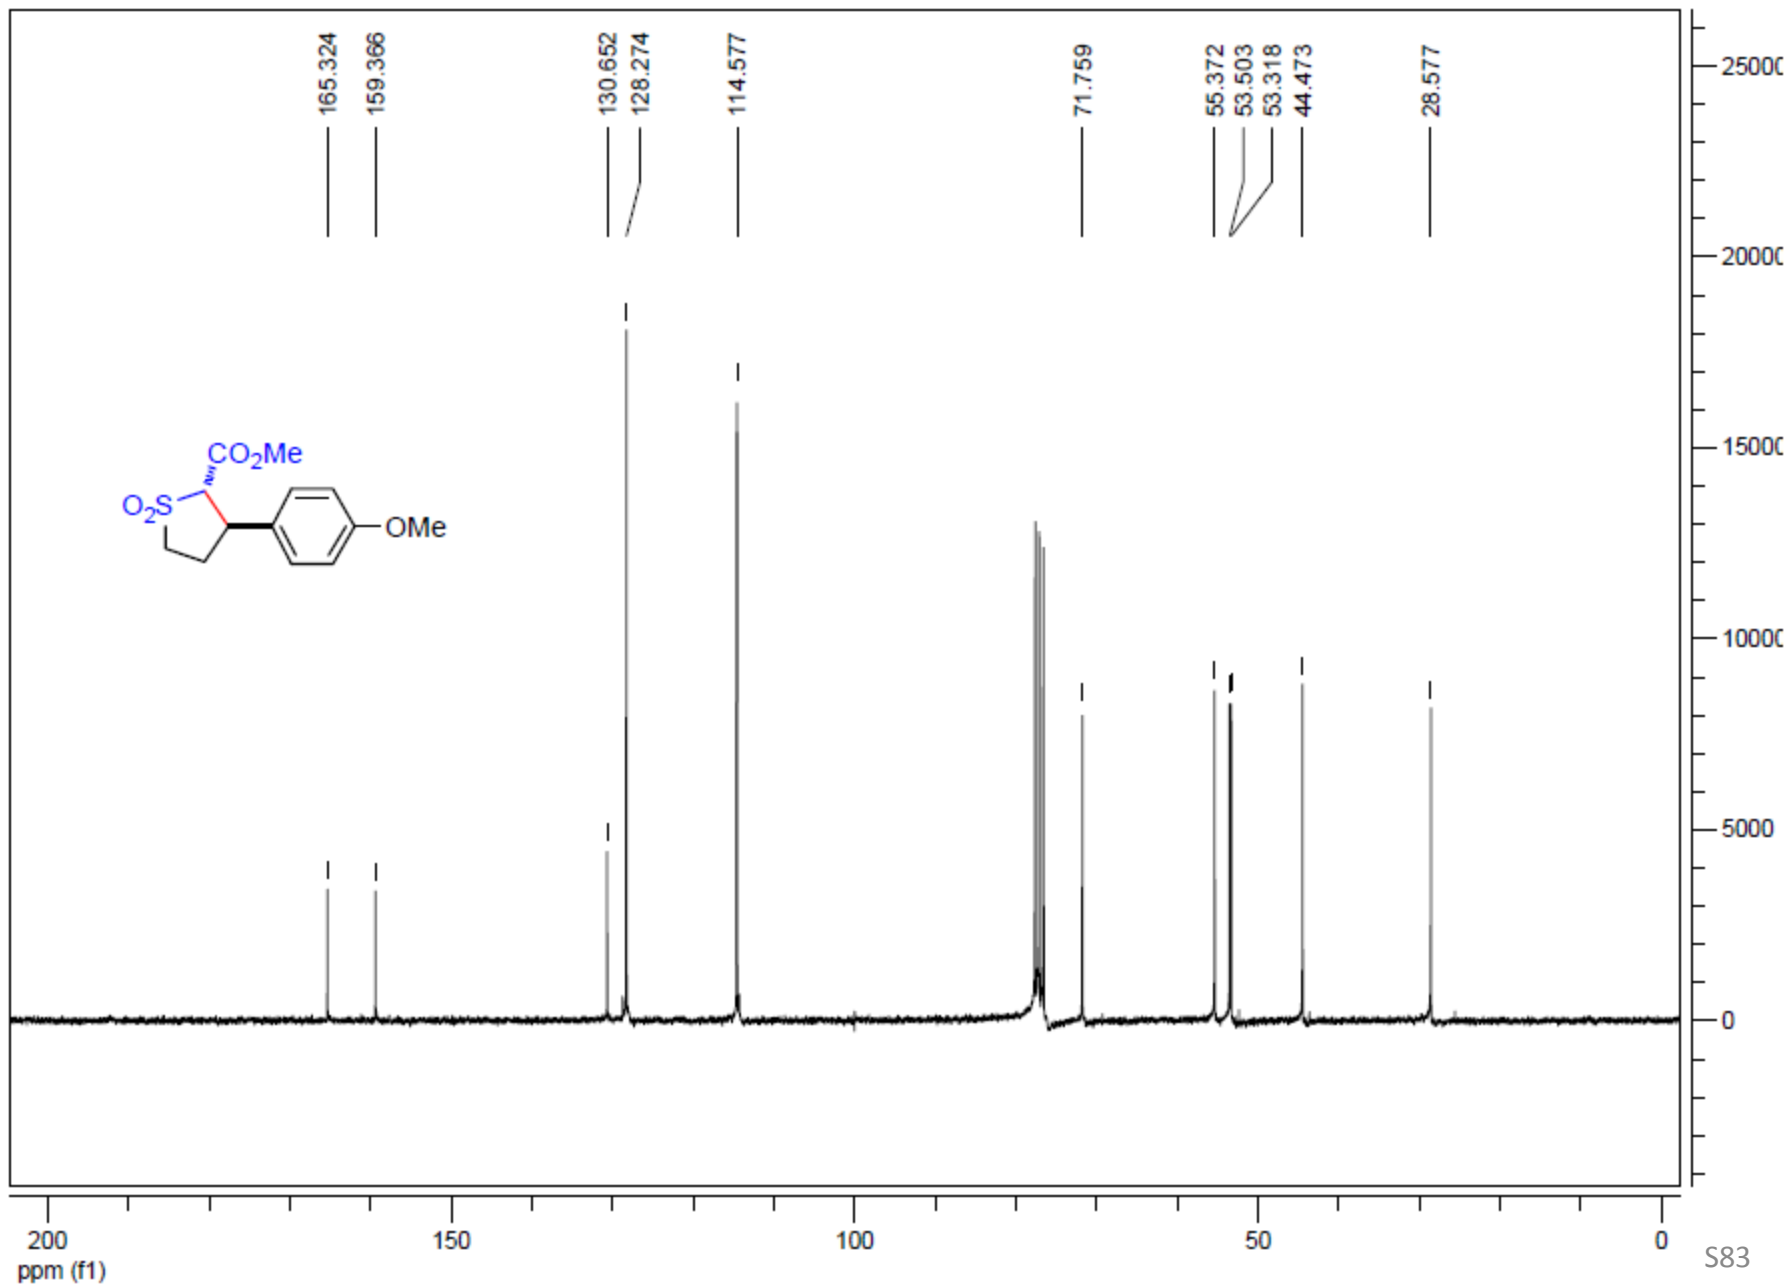



# methyl 3-(4-methoxyphenyl)tetrahydrothiophene-2-carboxylate 1,1-dioxide (2i)

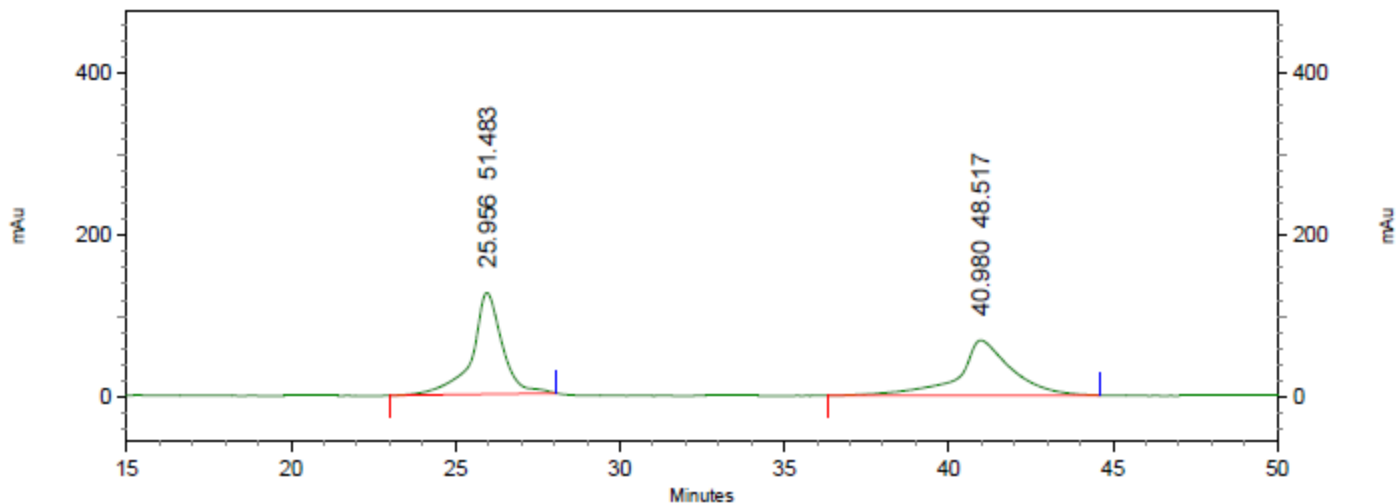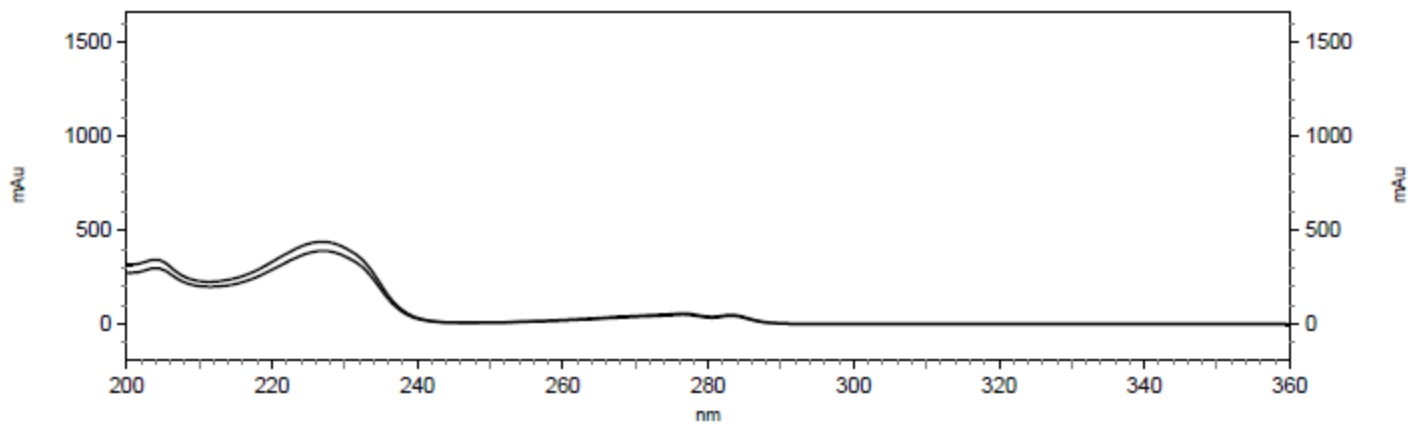

11: 224 nm, 4 nm Results

| Pk # | Retention Time | Area Percent |
|------|----------------|--------------|
| 1    | 25.956         | 51.483       |
| 2    | 40.980         | 48.517       |

|        |  |         |
|--------|--|---------|
| Totals |  | 100.000 |
|--------|--|---------|

# methyl 3-(4-methoxyphenyl)tetrahydrothiophene-2-carboxylate 1,1-dioxide (2i)

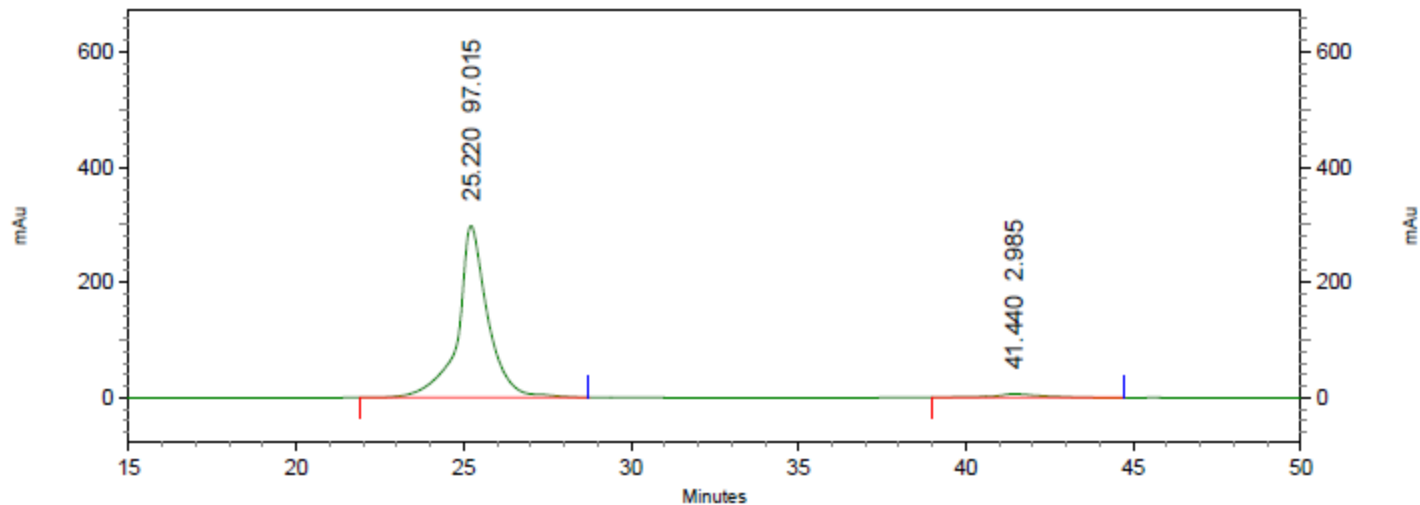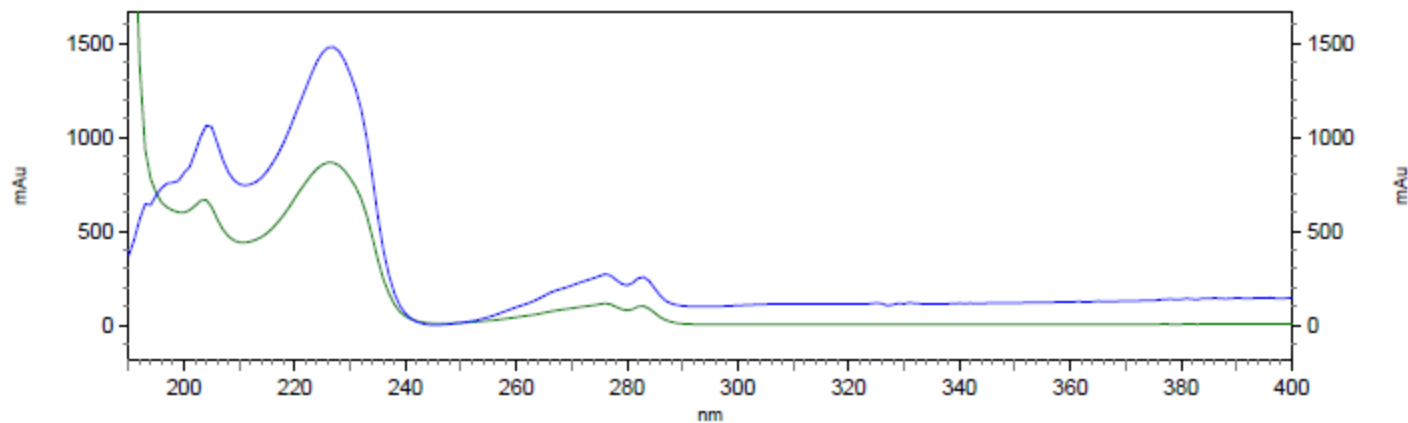

1: 272 nm, 4 nm Results

| Pk # | Retention Time | Area Percent |
|------|----------------|--------------|
| 1    | 25.220         | 97.015       |
| 2    | 41.440         | 2.985        |

|        |  |         |
|--------|--|---------|
| Totals |  | 100.000 |
|--------|--|---------|

methyl 3-(4-(methoxymethoxy)phenyl)tetrahydrothiophene-2-carboxylate 1,1-dioxide  
(2j)

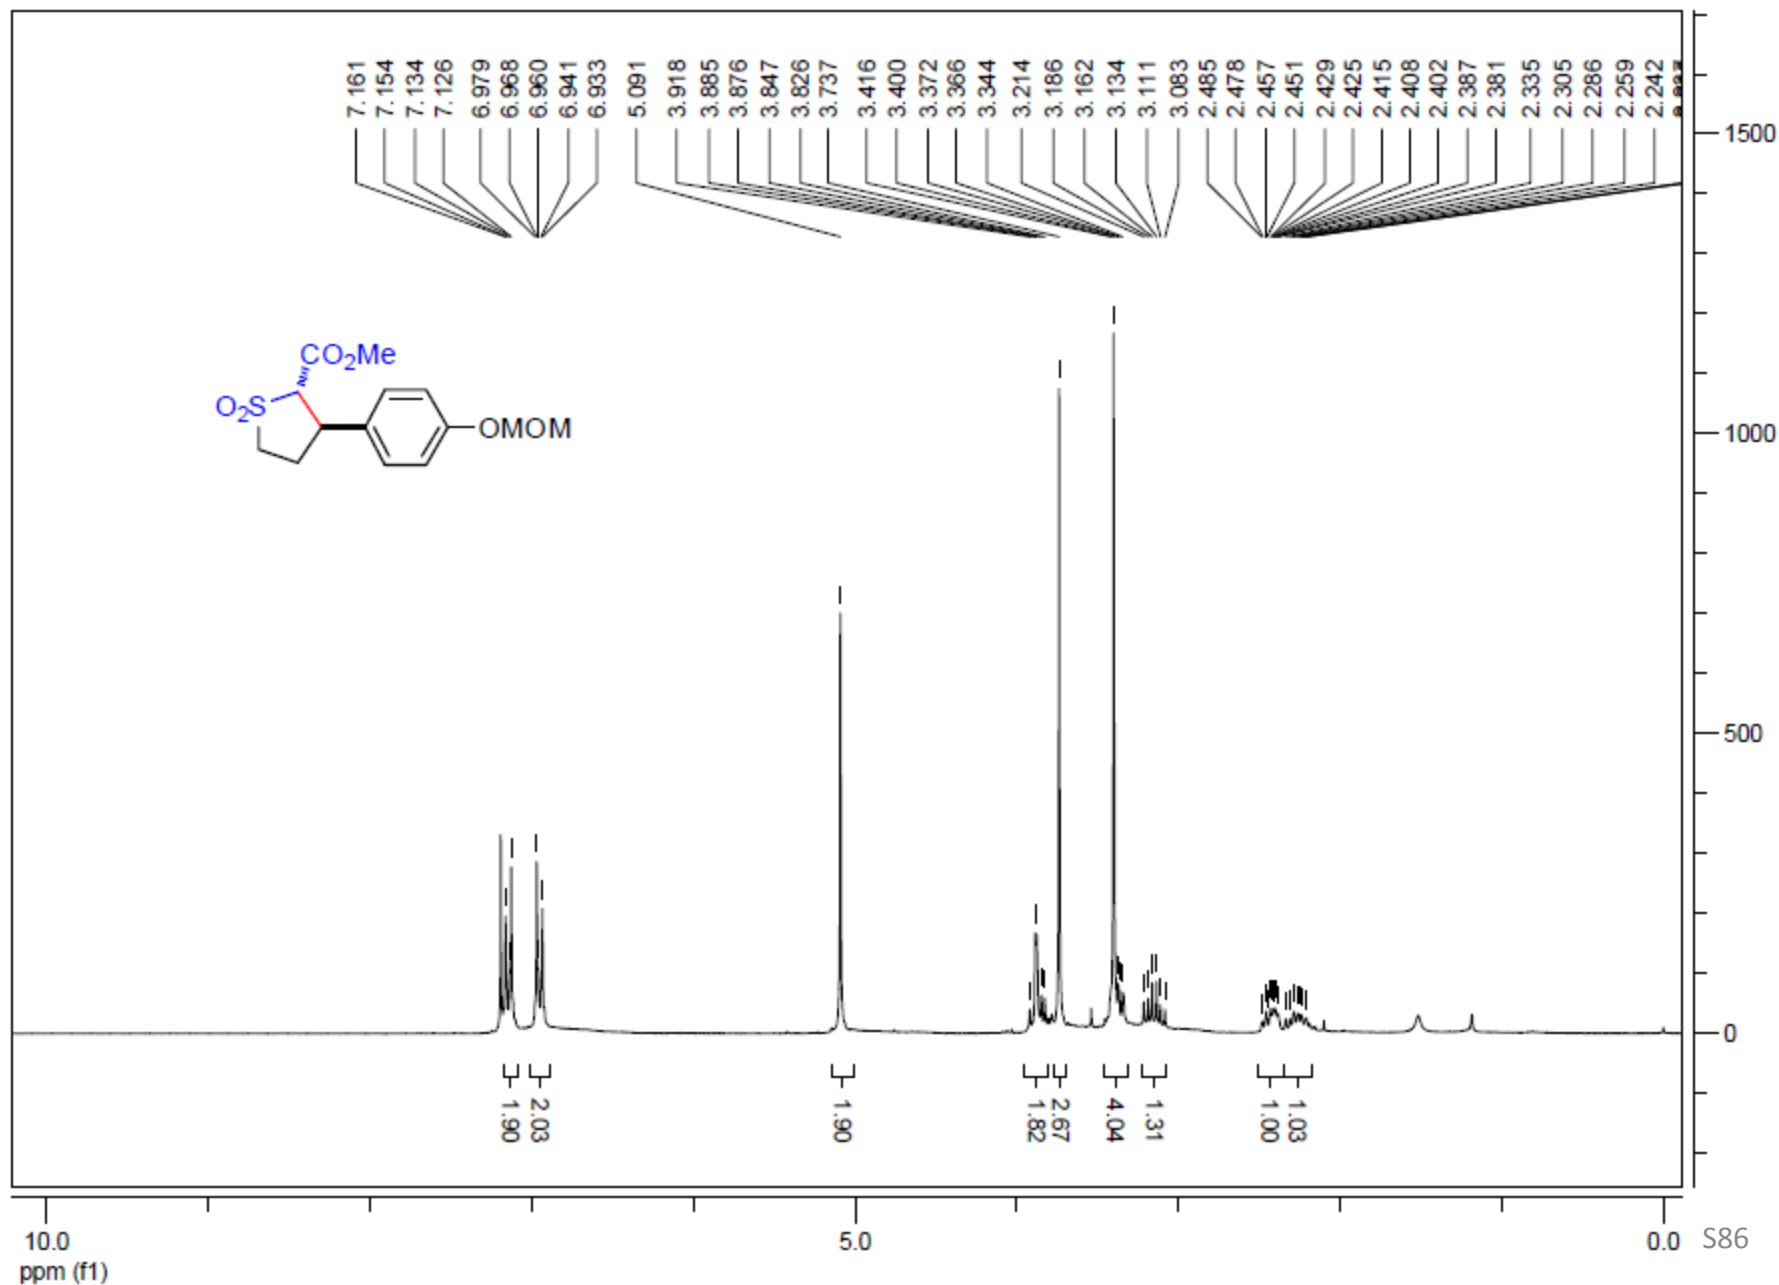

methyl 3-(4-(methoxymethoxy)phenyl)tetrahydrothiophene-2-carboxylate 1,1-dioxide  
(2j)

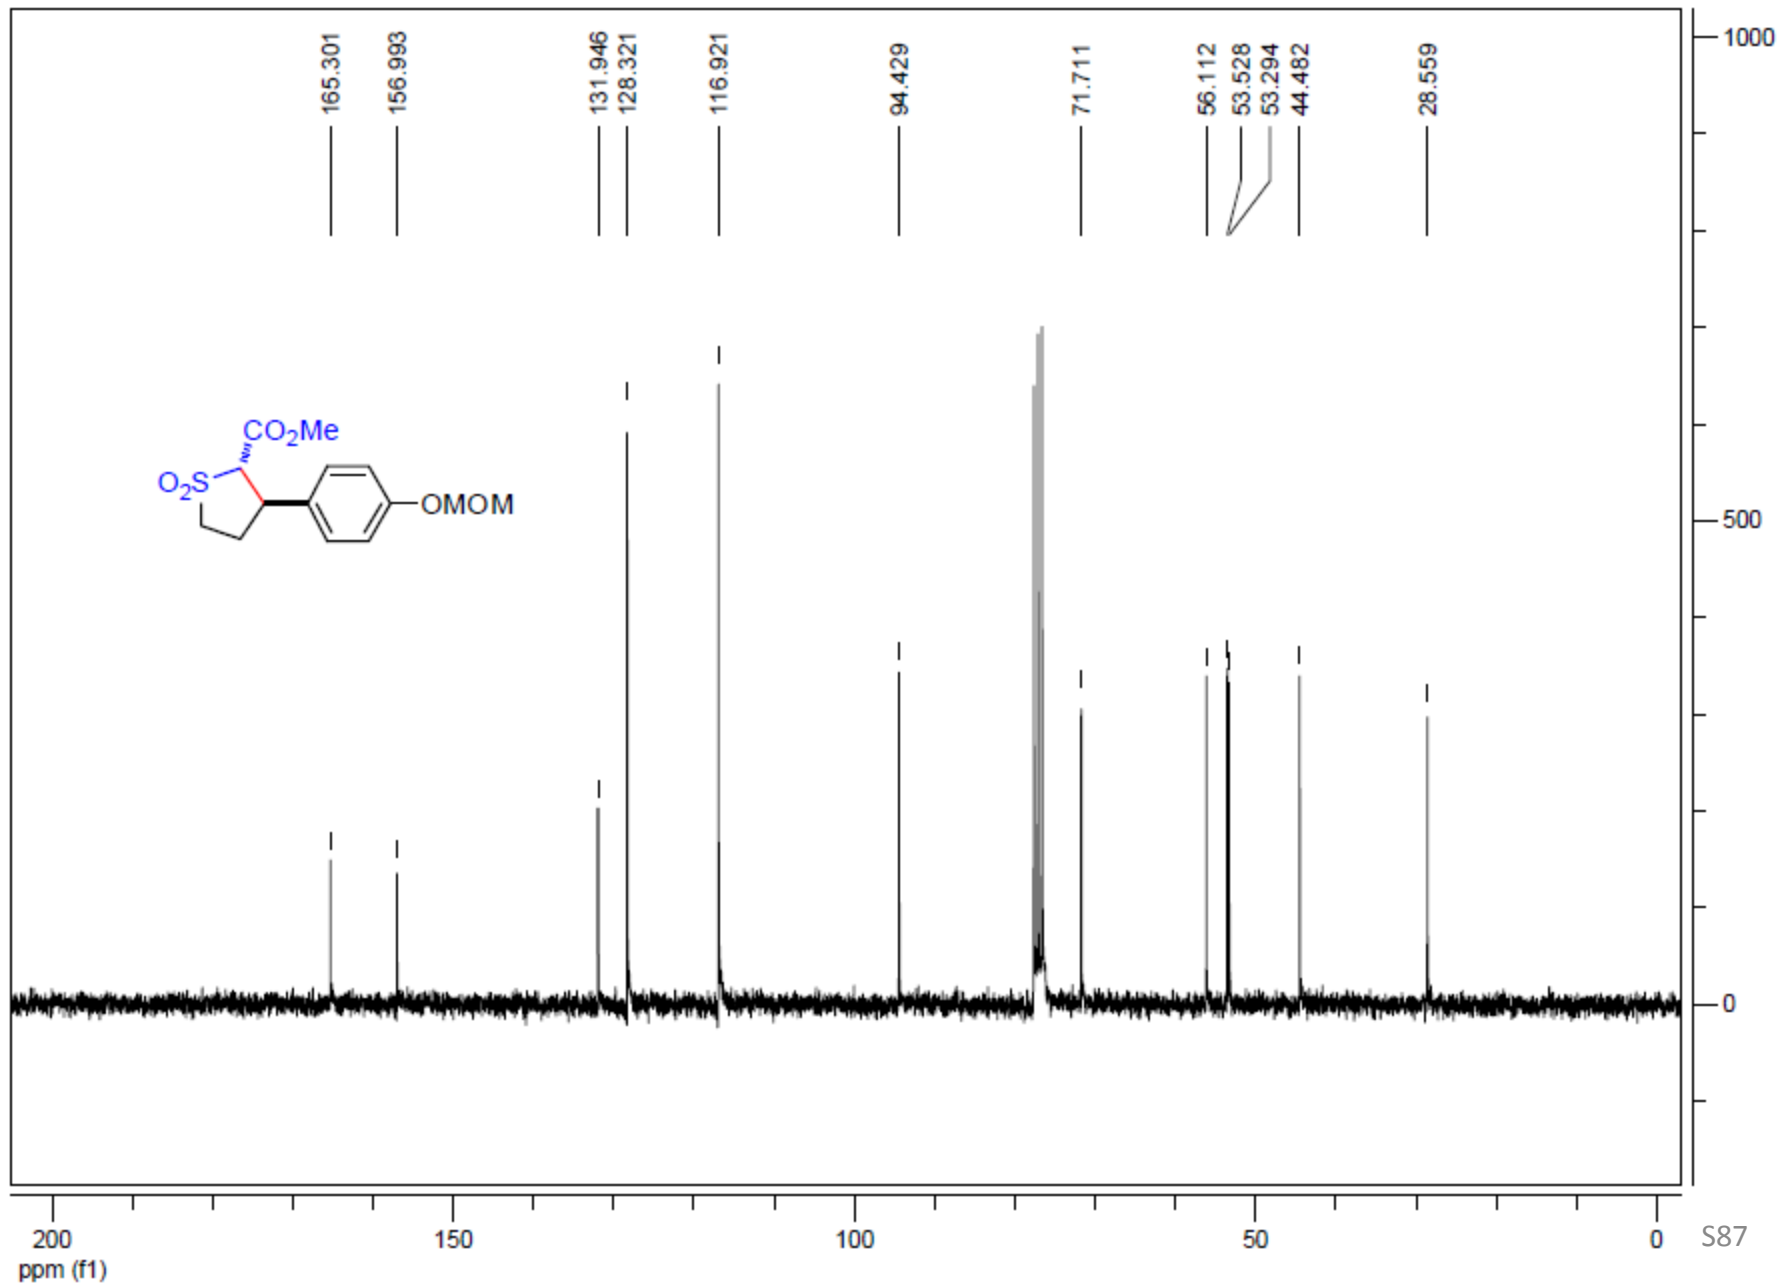

# methyl 3-(4-(methoxymethoxy)phenyl)tetrahydrothiophene-2-carboxylate 1,1-dioxide (2j)

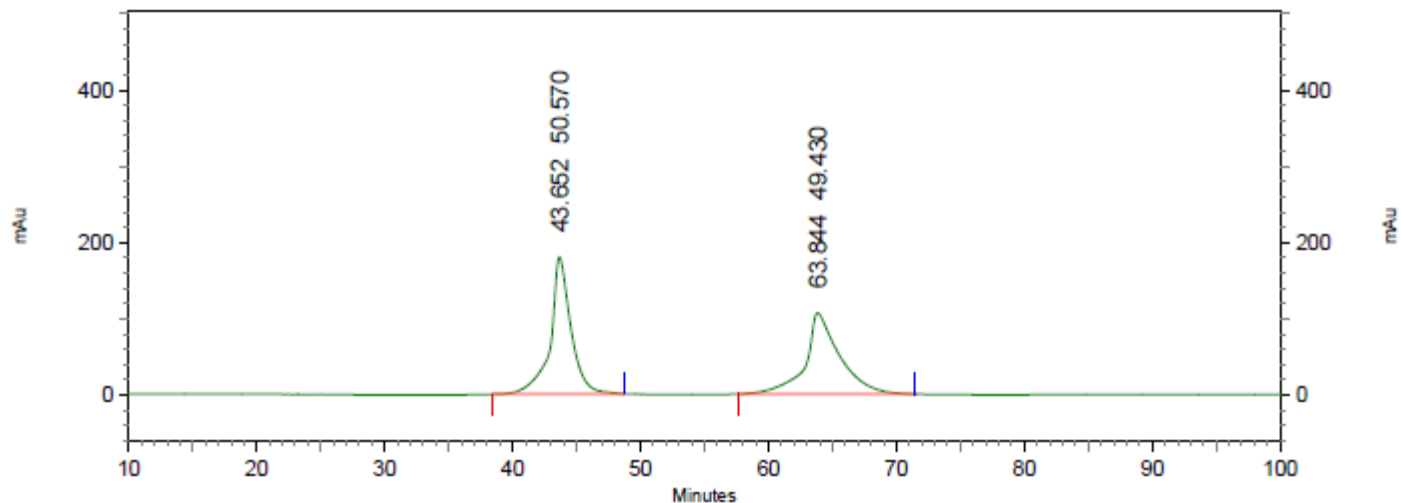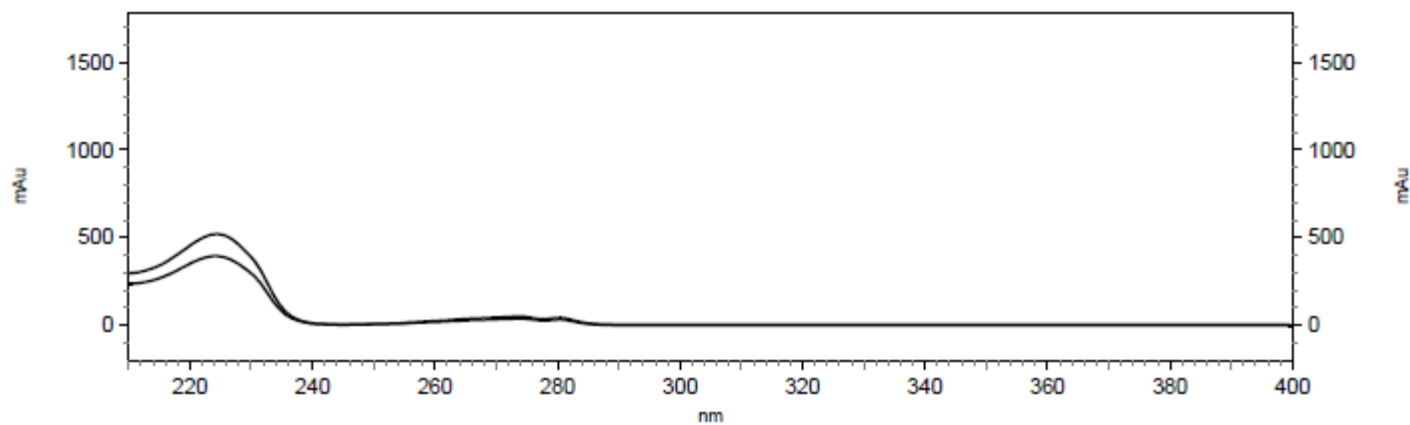

14: 225 nm, 4 nm Results

| Pk # | Retention Time | Area Percent |
|------|----------------|--------------|
| 1    | 43.652         | 50.570       |
| 2    | 63.844         | 49.430       |

|        |  |         |
|--------|--|---------|
| Totals |  | 100.000 |
|--------|--|---------|

# methyl 3-(4-(methoxymethoxy)phenyl)tetrahydrothiophene-2-carboxylate 1,1-dioxide (2j)

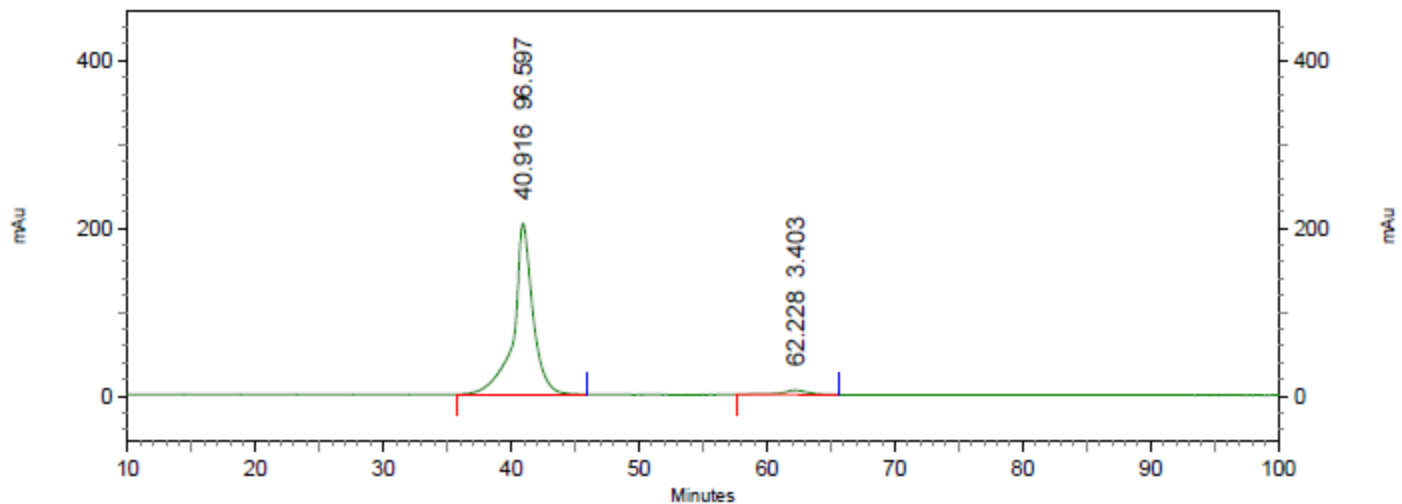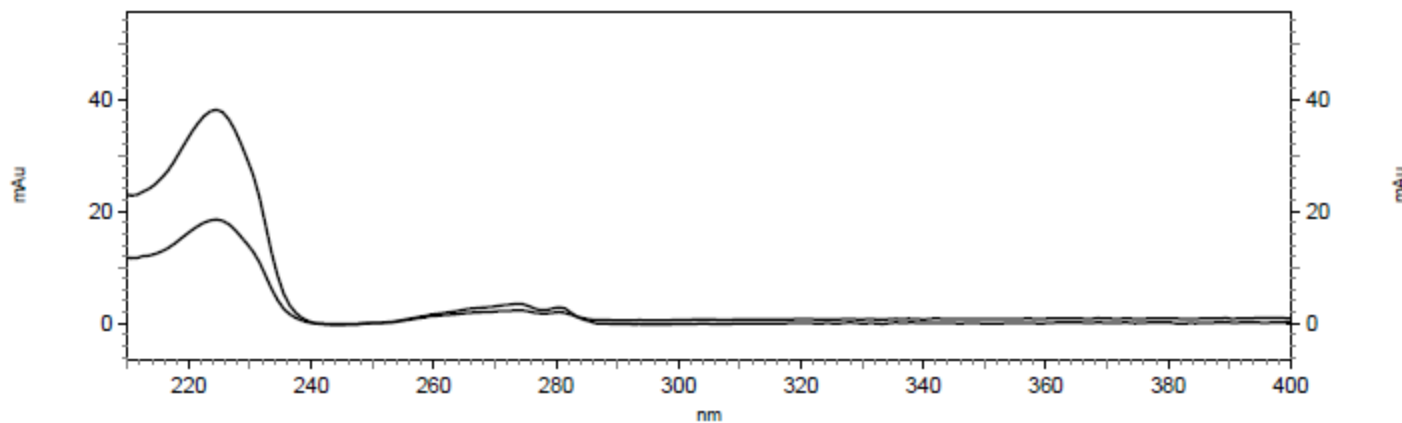

14: 225 nm, 4 nm Results

| Pk # | Retention Time | Area Percent |
|------|----------------|--------------|
| 1    | 40.916         | 96.597       |
| 2    | 62.228         | 3.403        |

|        |  |         |
|--------|--|---------|
| Totals |  | 100.000 |
|--------|--|---------|

methyl 3-(4-hydroxyphenyl)tetrahydrothiophene-2-carboxylate 1,1-dioxide (**2k**)

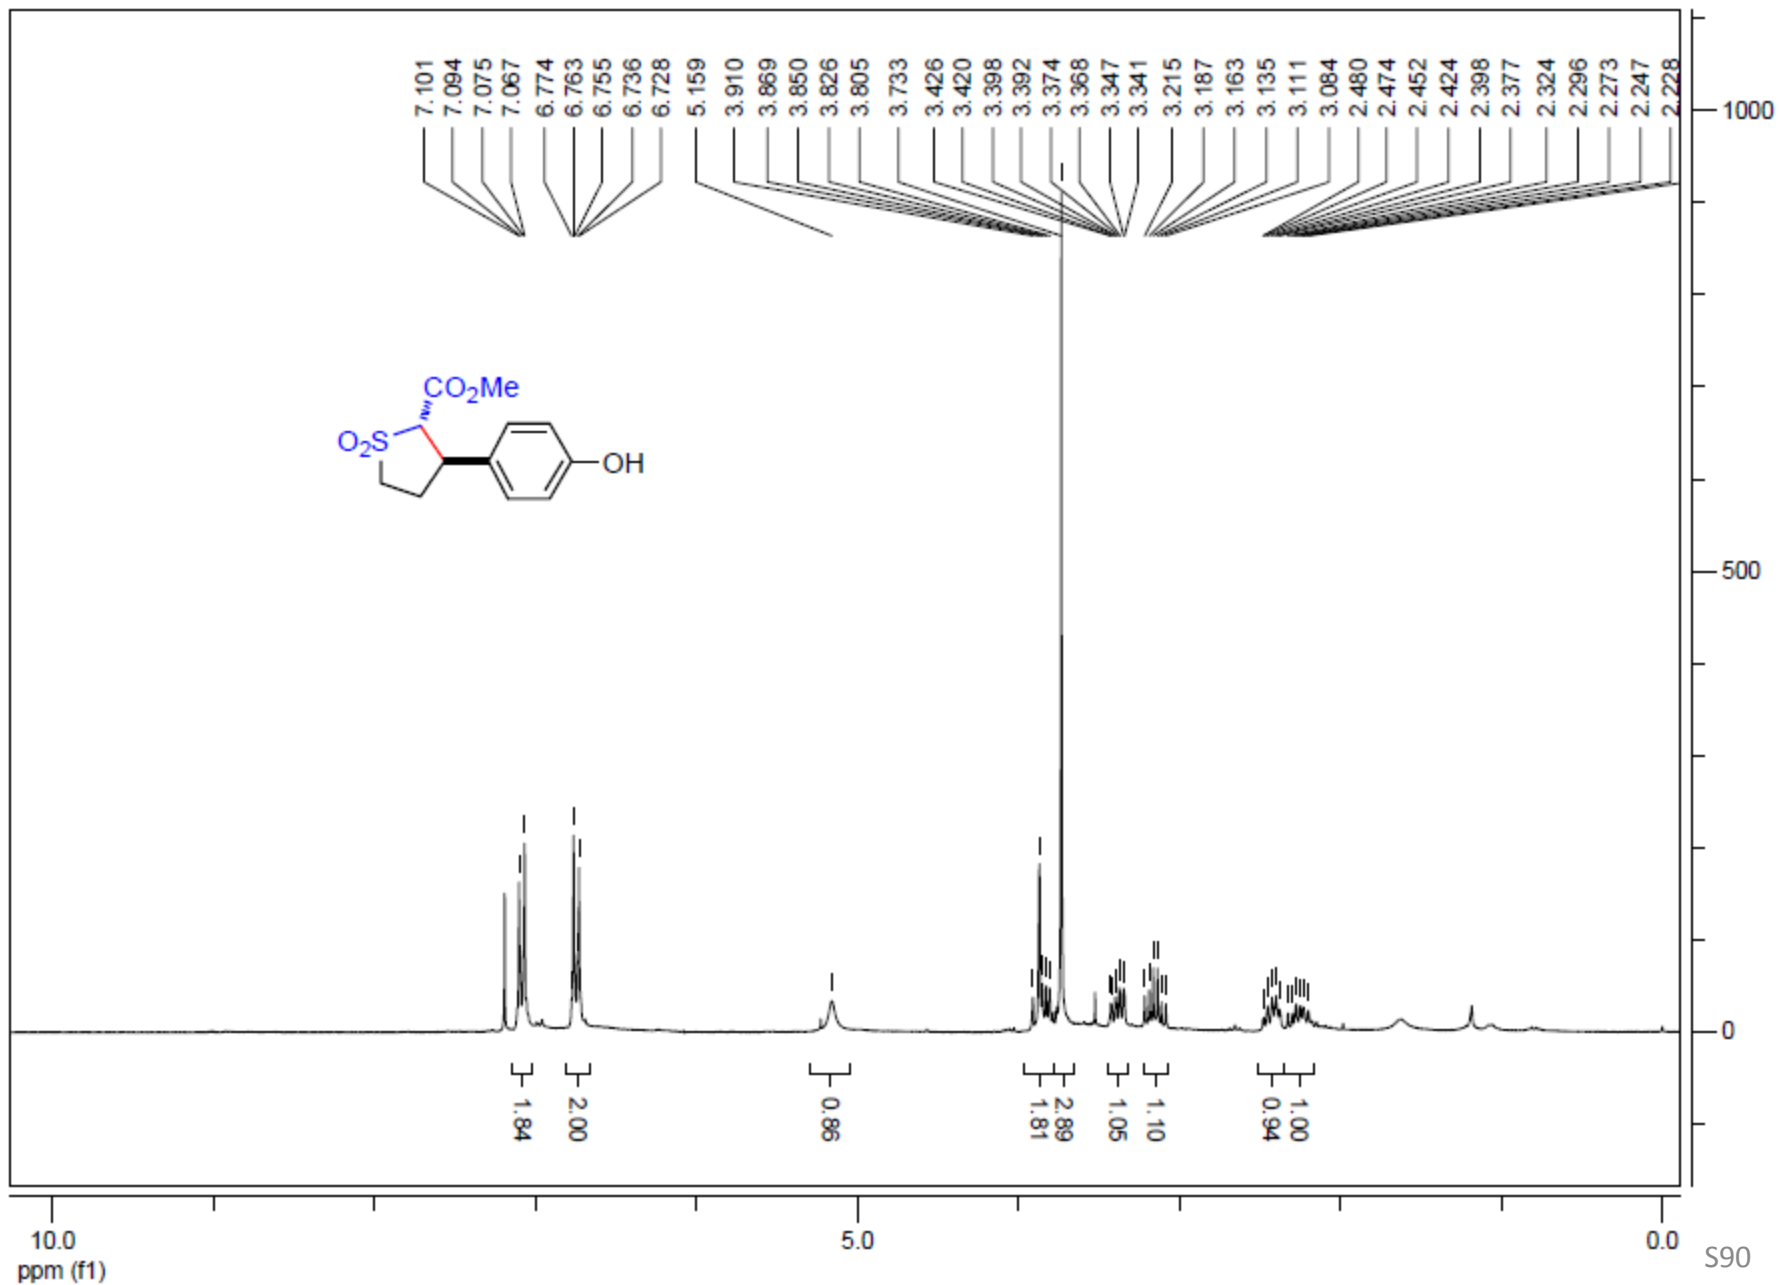

methyl 3-(4-hydroxyphenyl)tetrahydrothiophene-2-carboxylate 1,1-dioxide (**2k**)

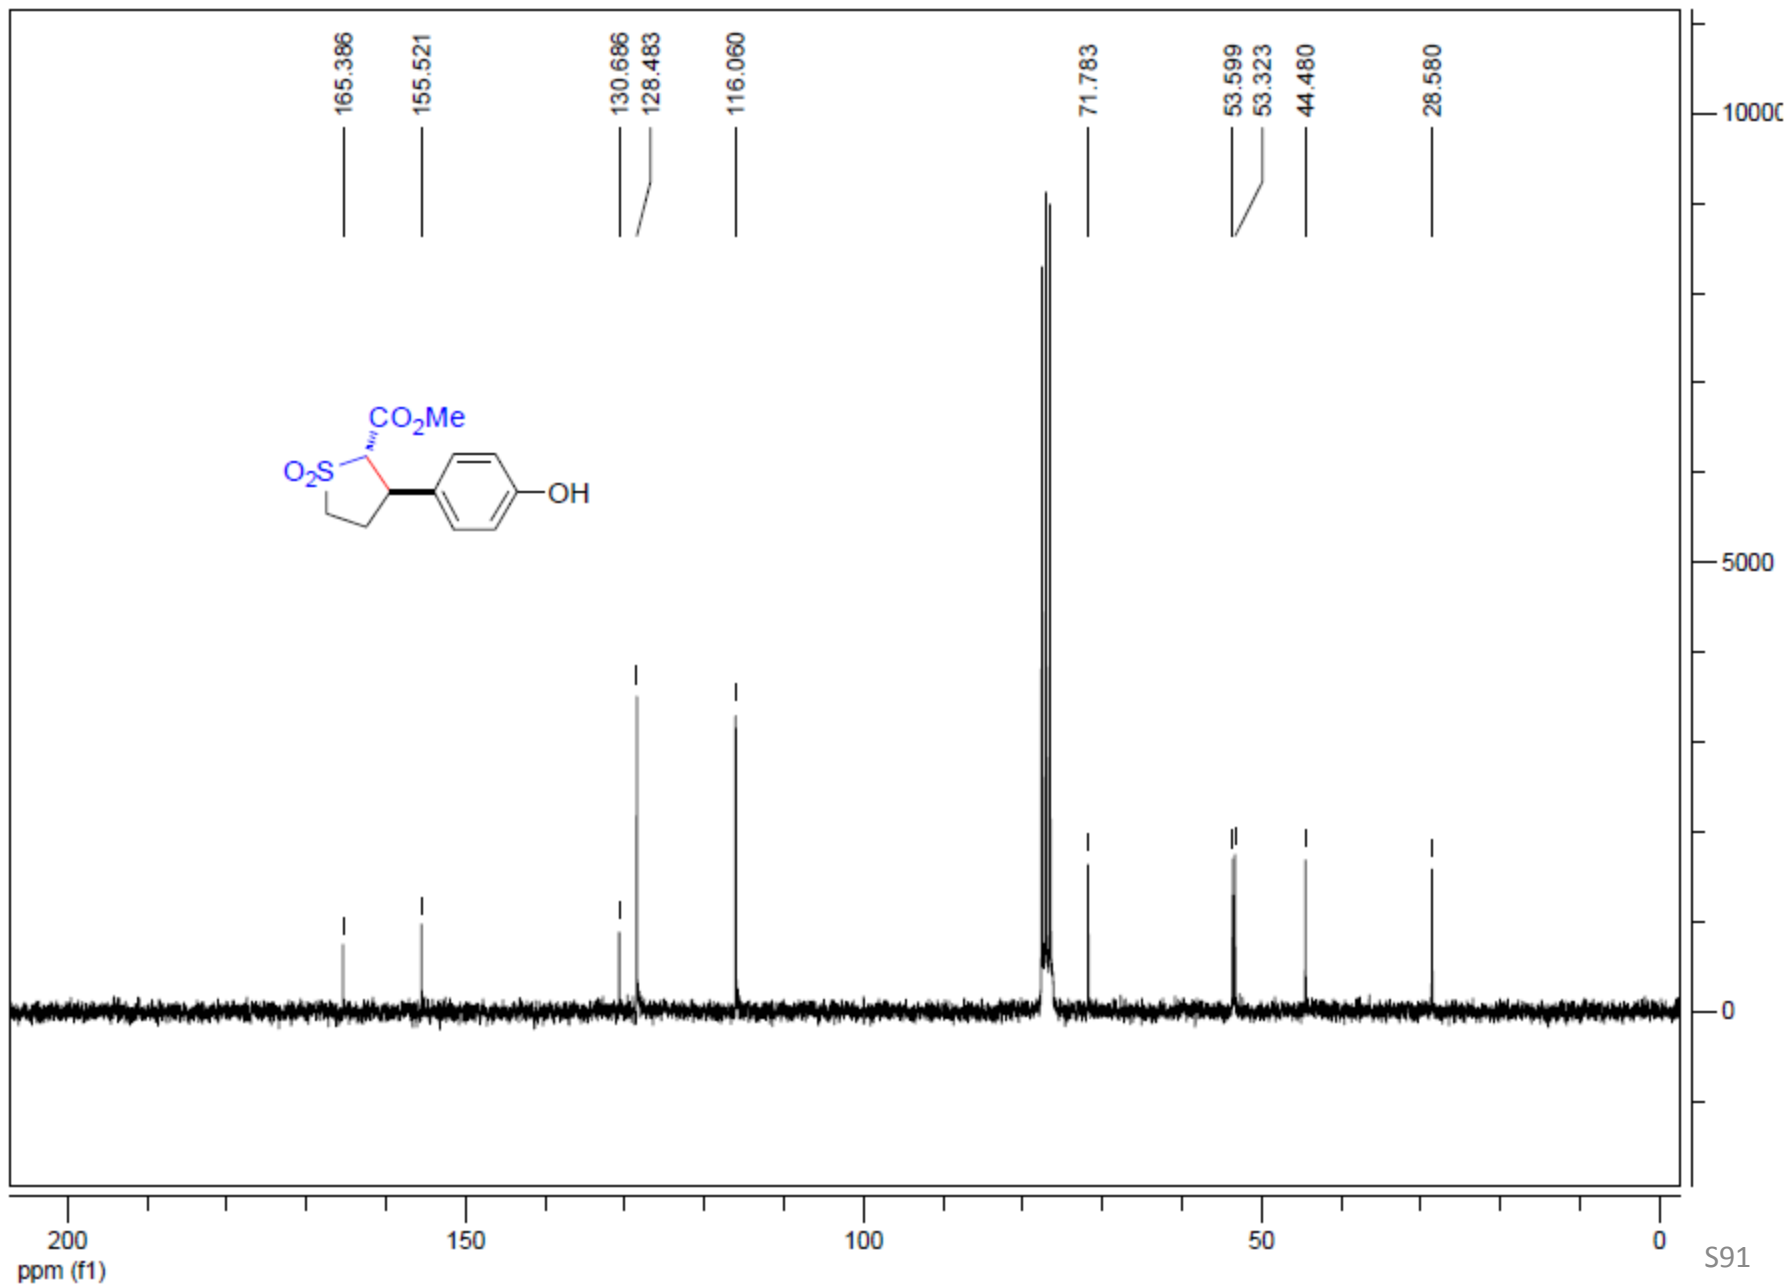



# methyl 3-(4-hydroxyphenyl)tetrahydrothiophene-2-carboxylate 1,1-dioxide (2k)

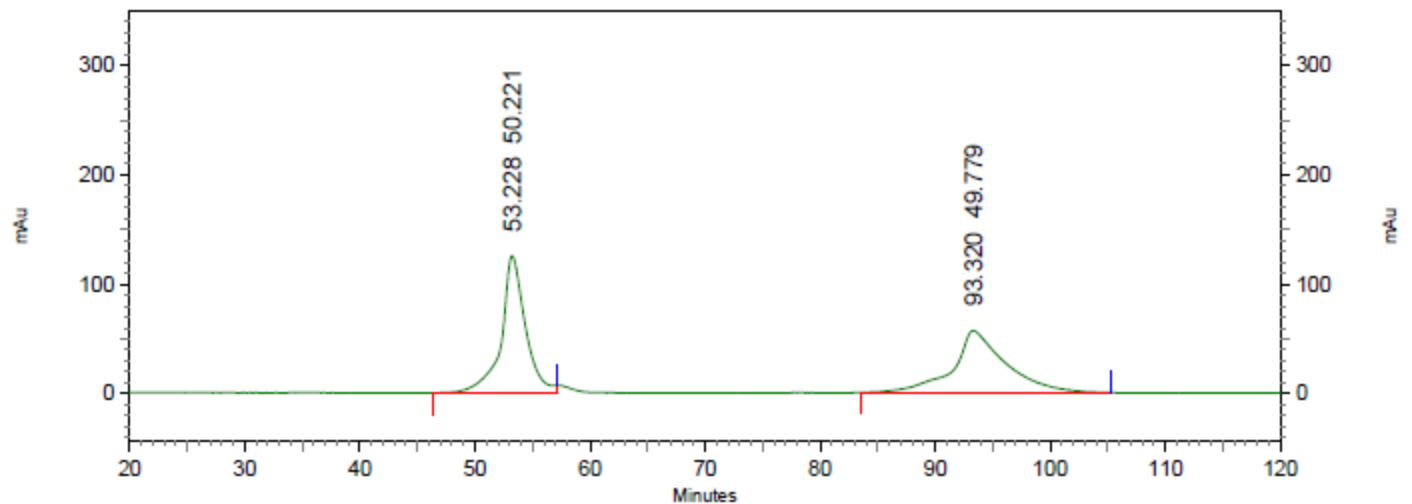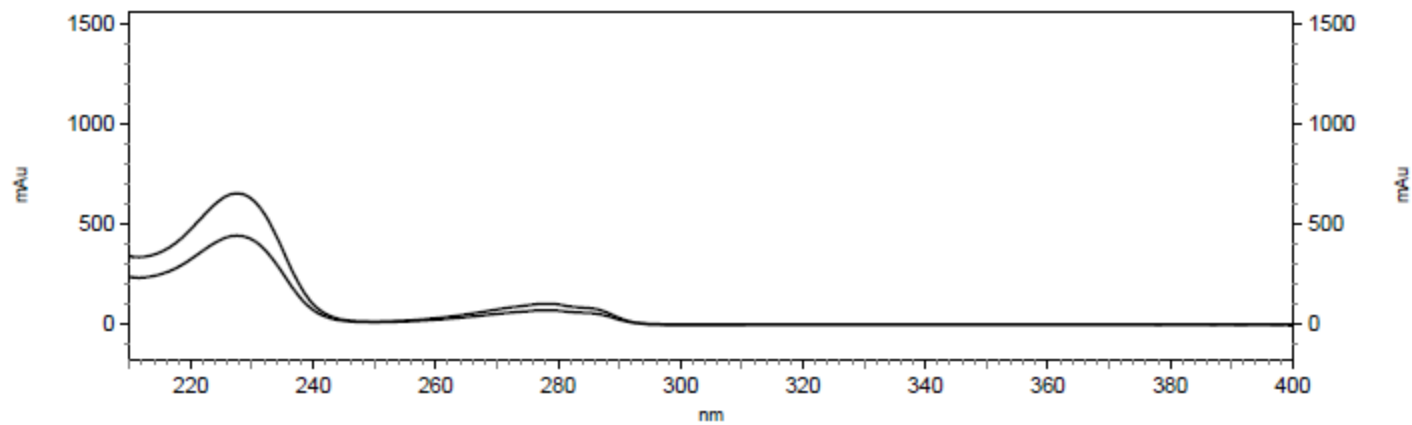

14: 225 nm, 4 nm Results

| Pk #   | Retention Time | Area Percent |
|--------|----------------|--------------|
| 1      | 53.228         | 50.221       |
| 2      | 93.320         | 49.779       |
| Totals |                | 100.000      |

# methyl 3-(4-hydroxyphenyl)tetrahydrothiophene-2-carboxylate 1,1-dioxide (2k)

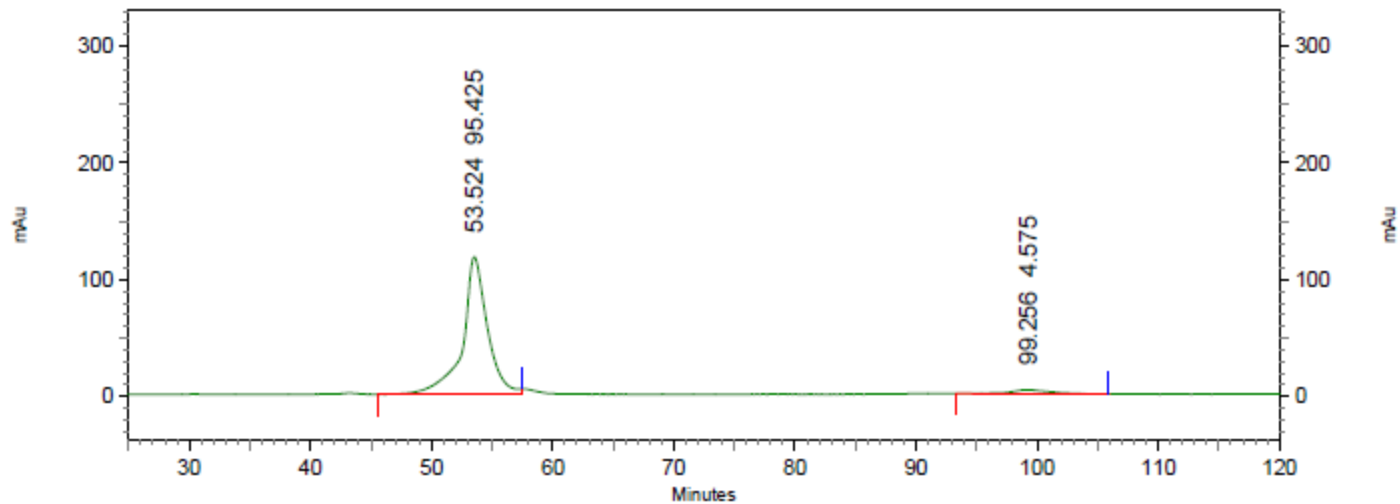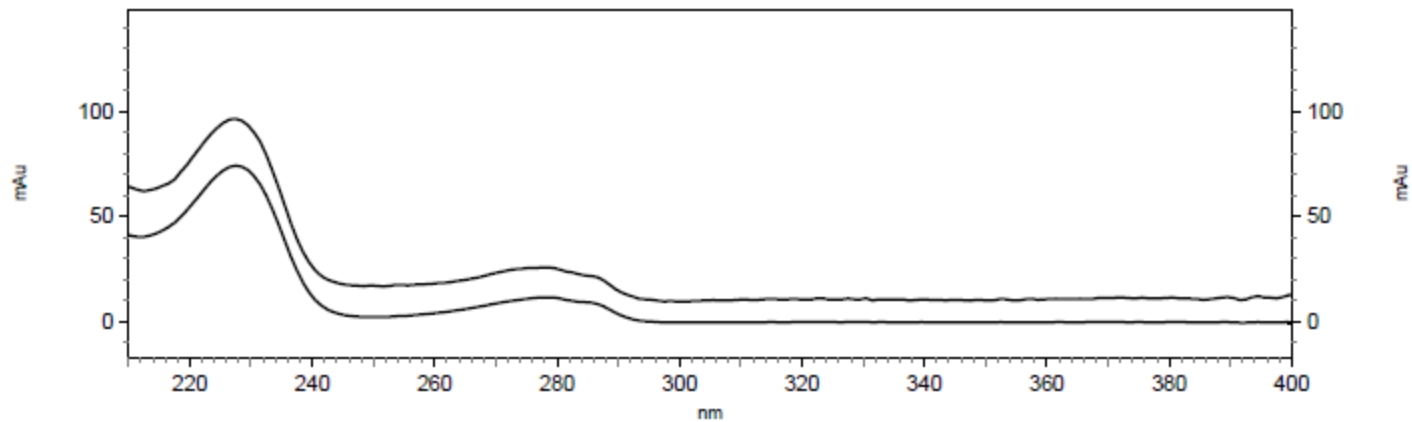

14: 225 nm, 4 nm Results

| Pk #   | Retention Time | Area Percent |
|--------|----------------|--------------|
| 1      | 53.524         | 95.425       |
| 2      | 99.256         | 4.575        |
| Totals |                | 100.000      |

# methyl 3-(4-aminophenyl)tetrahydrothiophene-2-carboxylate 1,1-dioxide (**2I**)

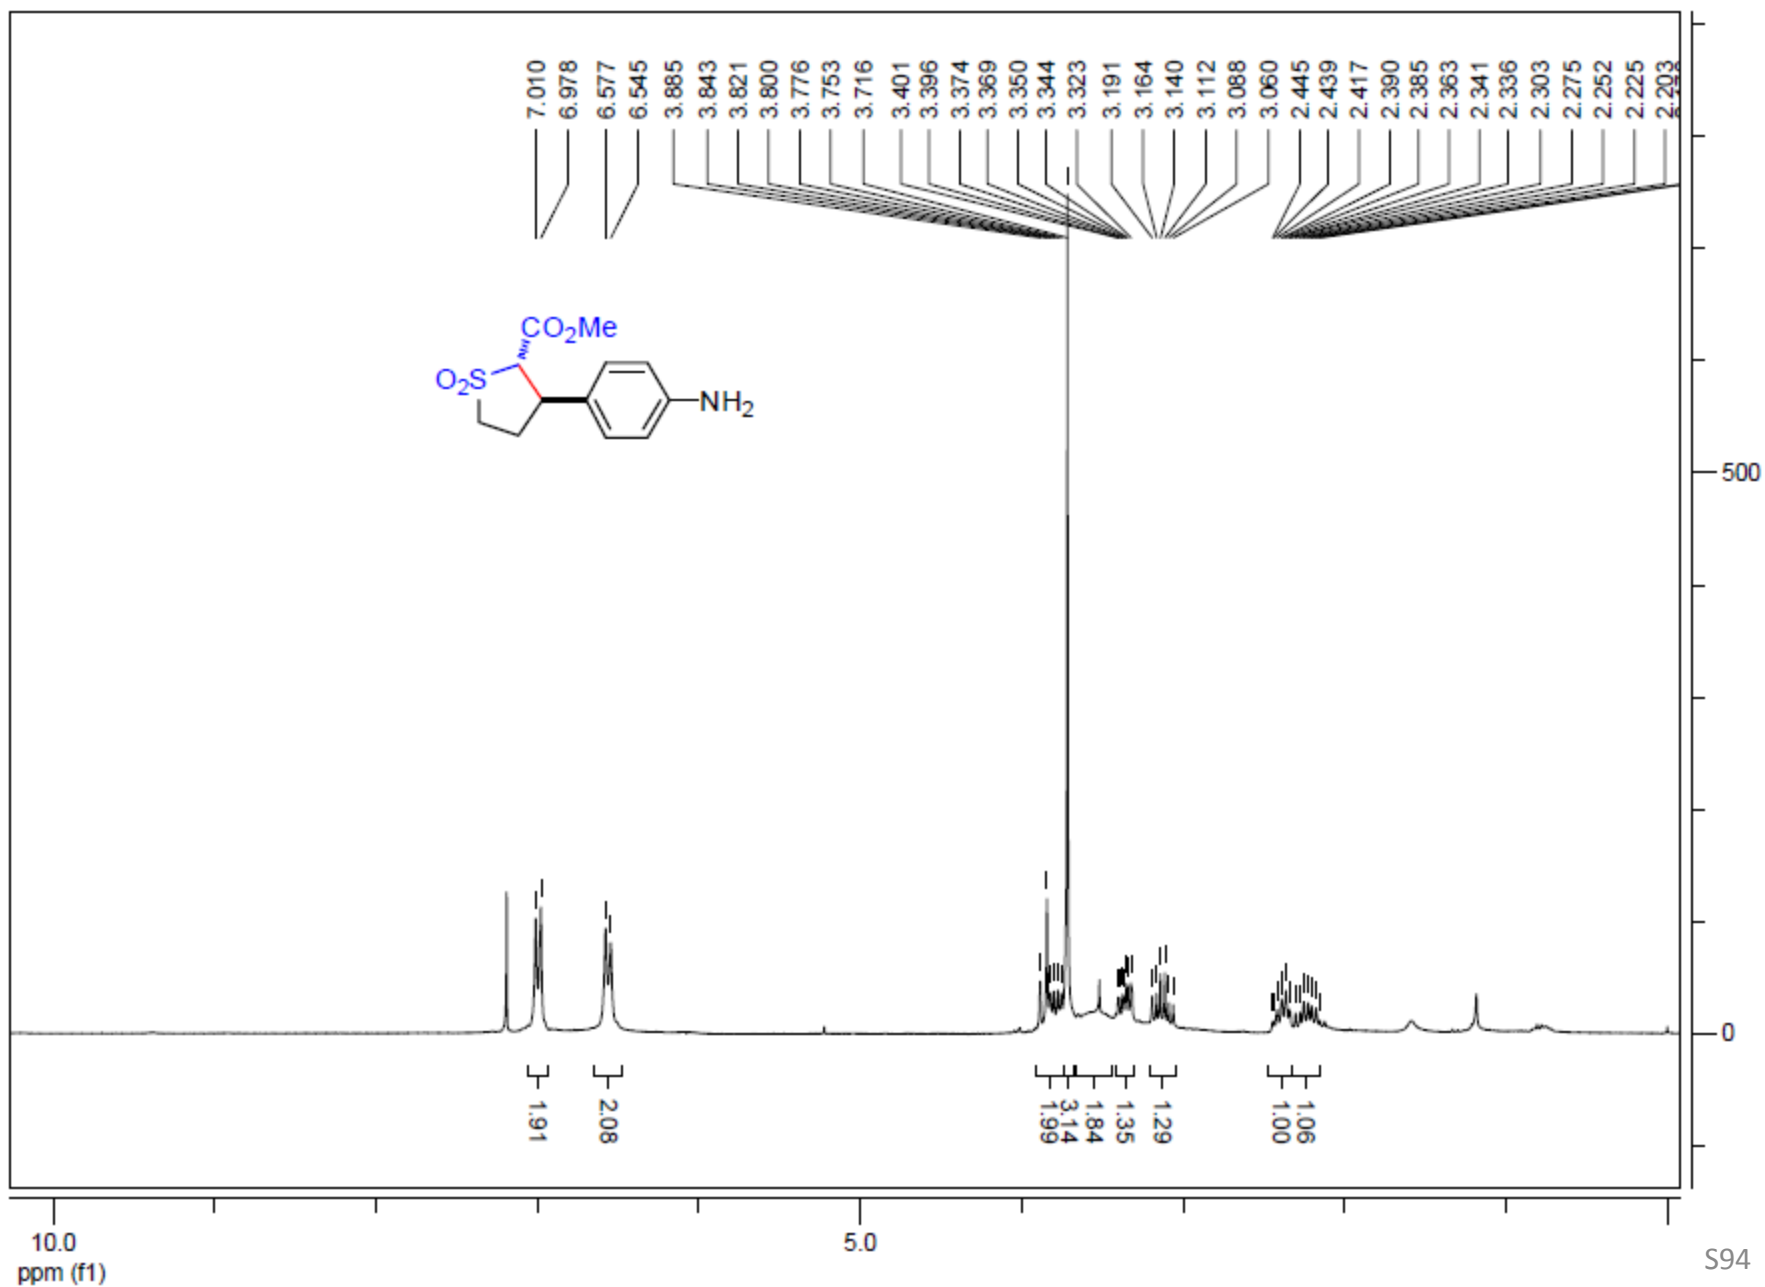

methyl 3-(4-aminophenyl)tetrahydrothiophene-2-carboxylate 1,1-dioxide (**2I**)

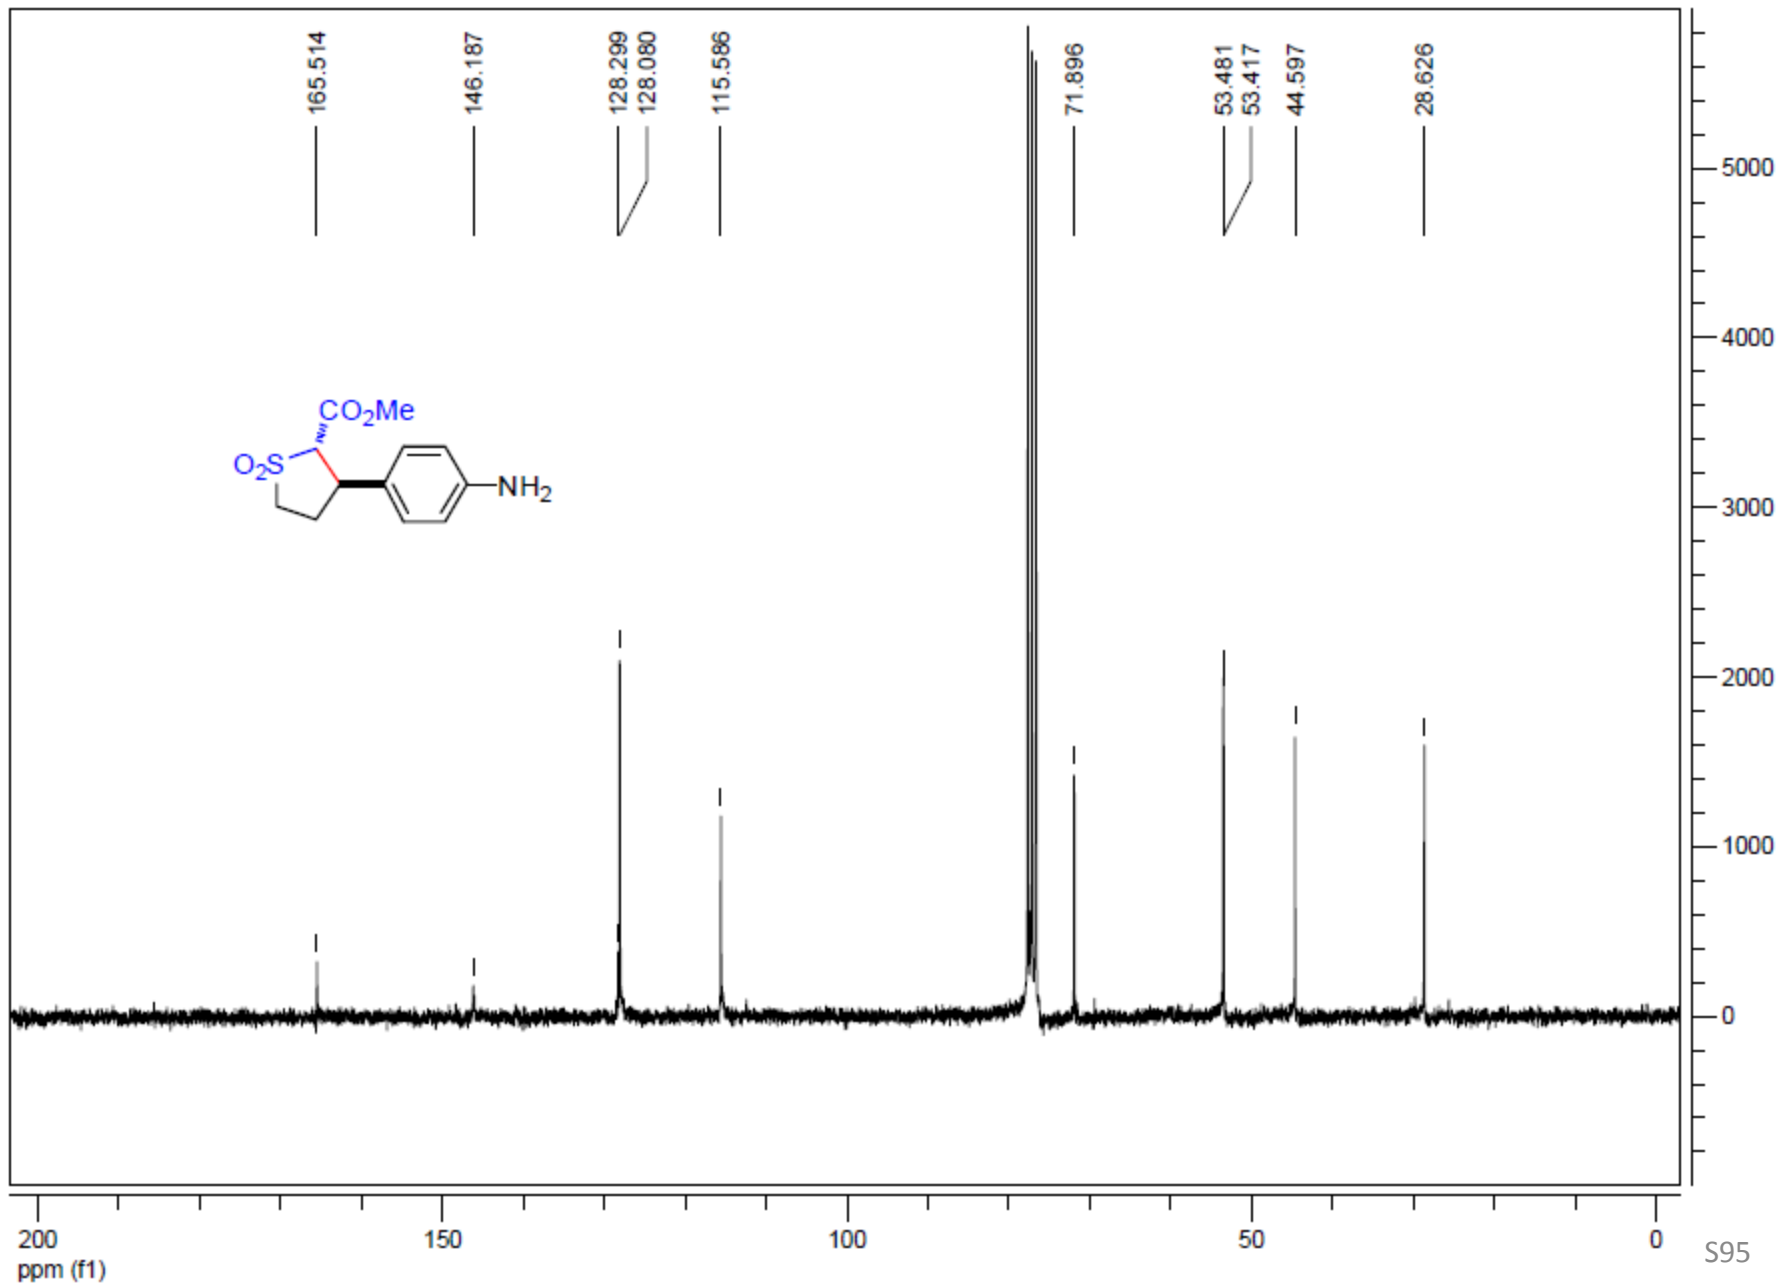

# methyl 3-(4-aminophenyl)tetrahydrothiophene-2-carboxylate 1,1-dioxide (2I)

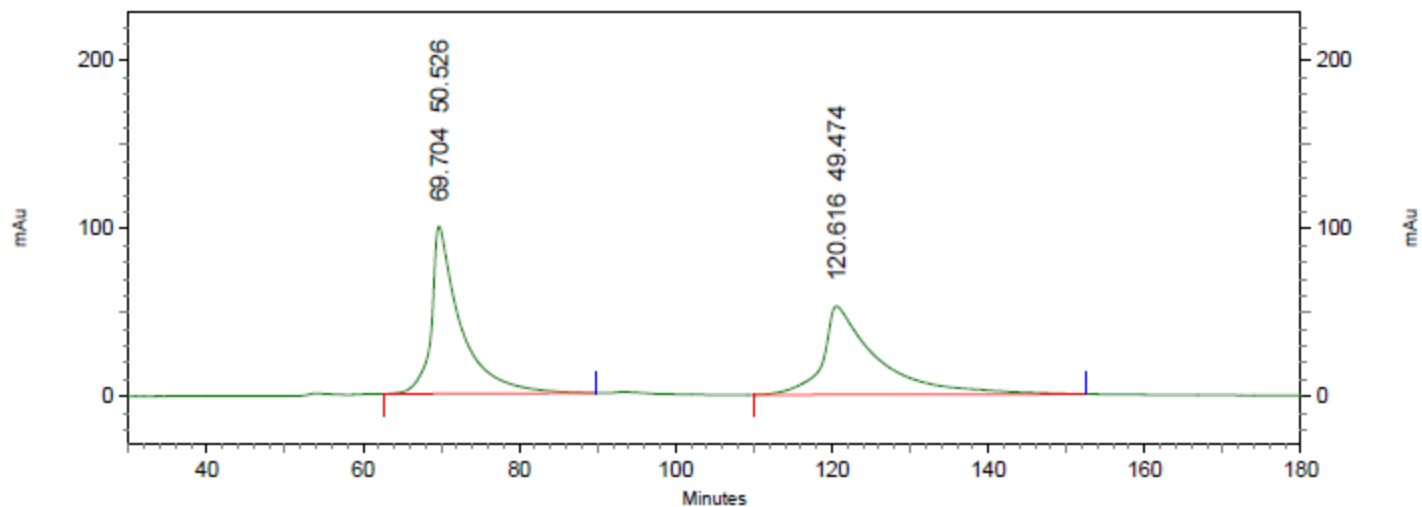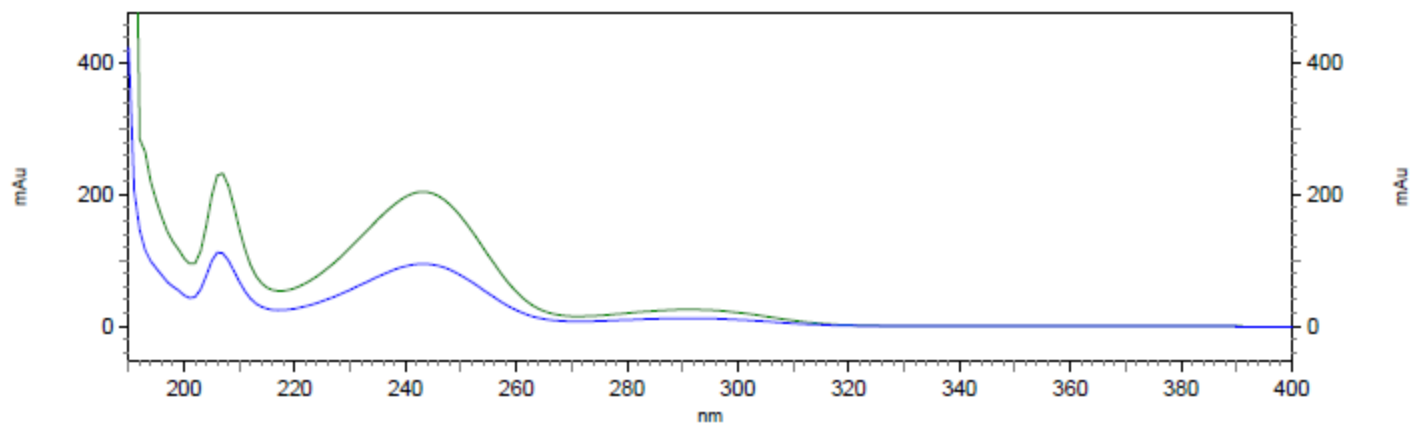

1: 246 nm, 4 nm Results

| Pk #   | Retention Time | Area Percent |
|--------|----------------|--------------|
| 1      | 69.704         | 50.526       |
| 2      | 120.616        | 49.474       |
| Totals |                | 100.000      |

# methyl 3-(4-aminophenyl)tetrahydrothiophene-2-carboxylate 1,1-dioxide (2I)

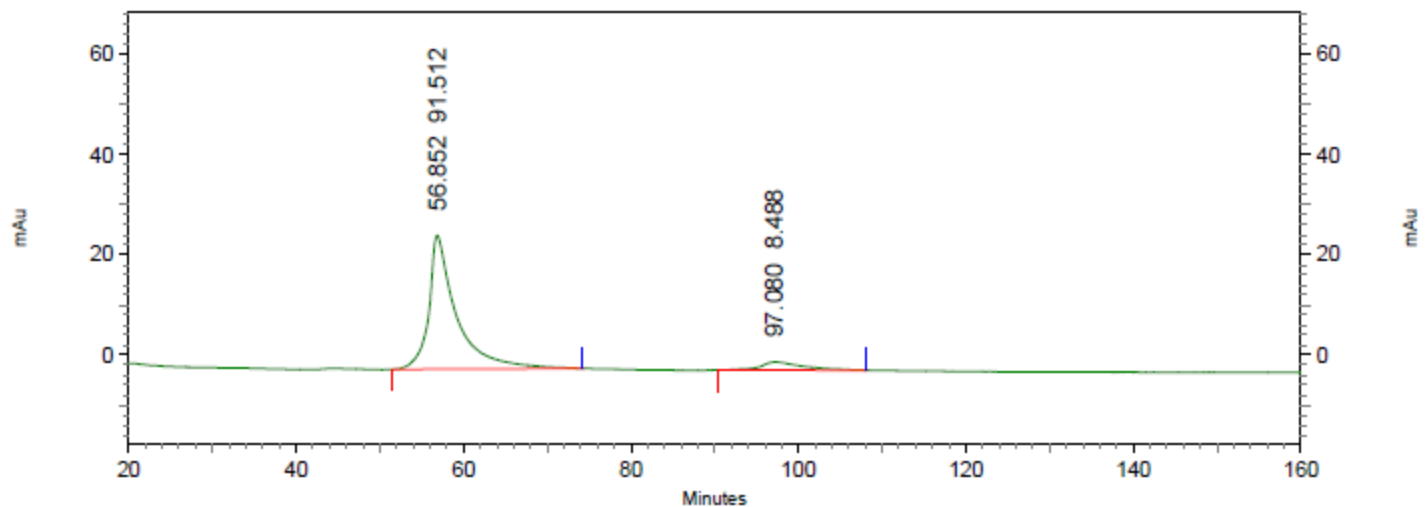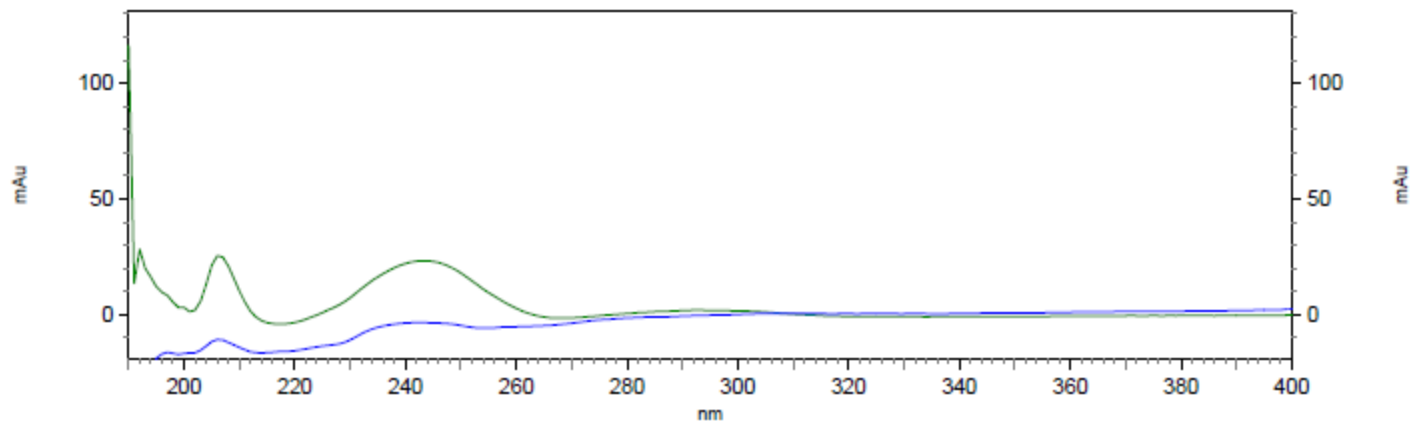

1: 247 nm, 4 nm Results

| Pk # | Retention Time | Area Percent |
|------|----------------|--------------|
| 1    | 56.852         | 91.512       |
| 2    | 97.080         | 8.488        |

|        |  |         |
|--------|--|---------|
| Totals |  | 100.000 |
|--------|--|---------|

methyl 3-(4-acetamidophenyl)tetrahydrothiophene-2-carboxylate 1,1-dioxide (**2m**)

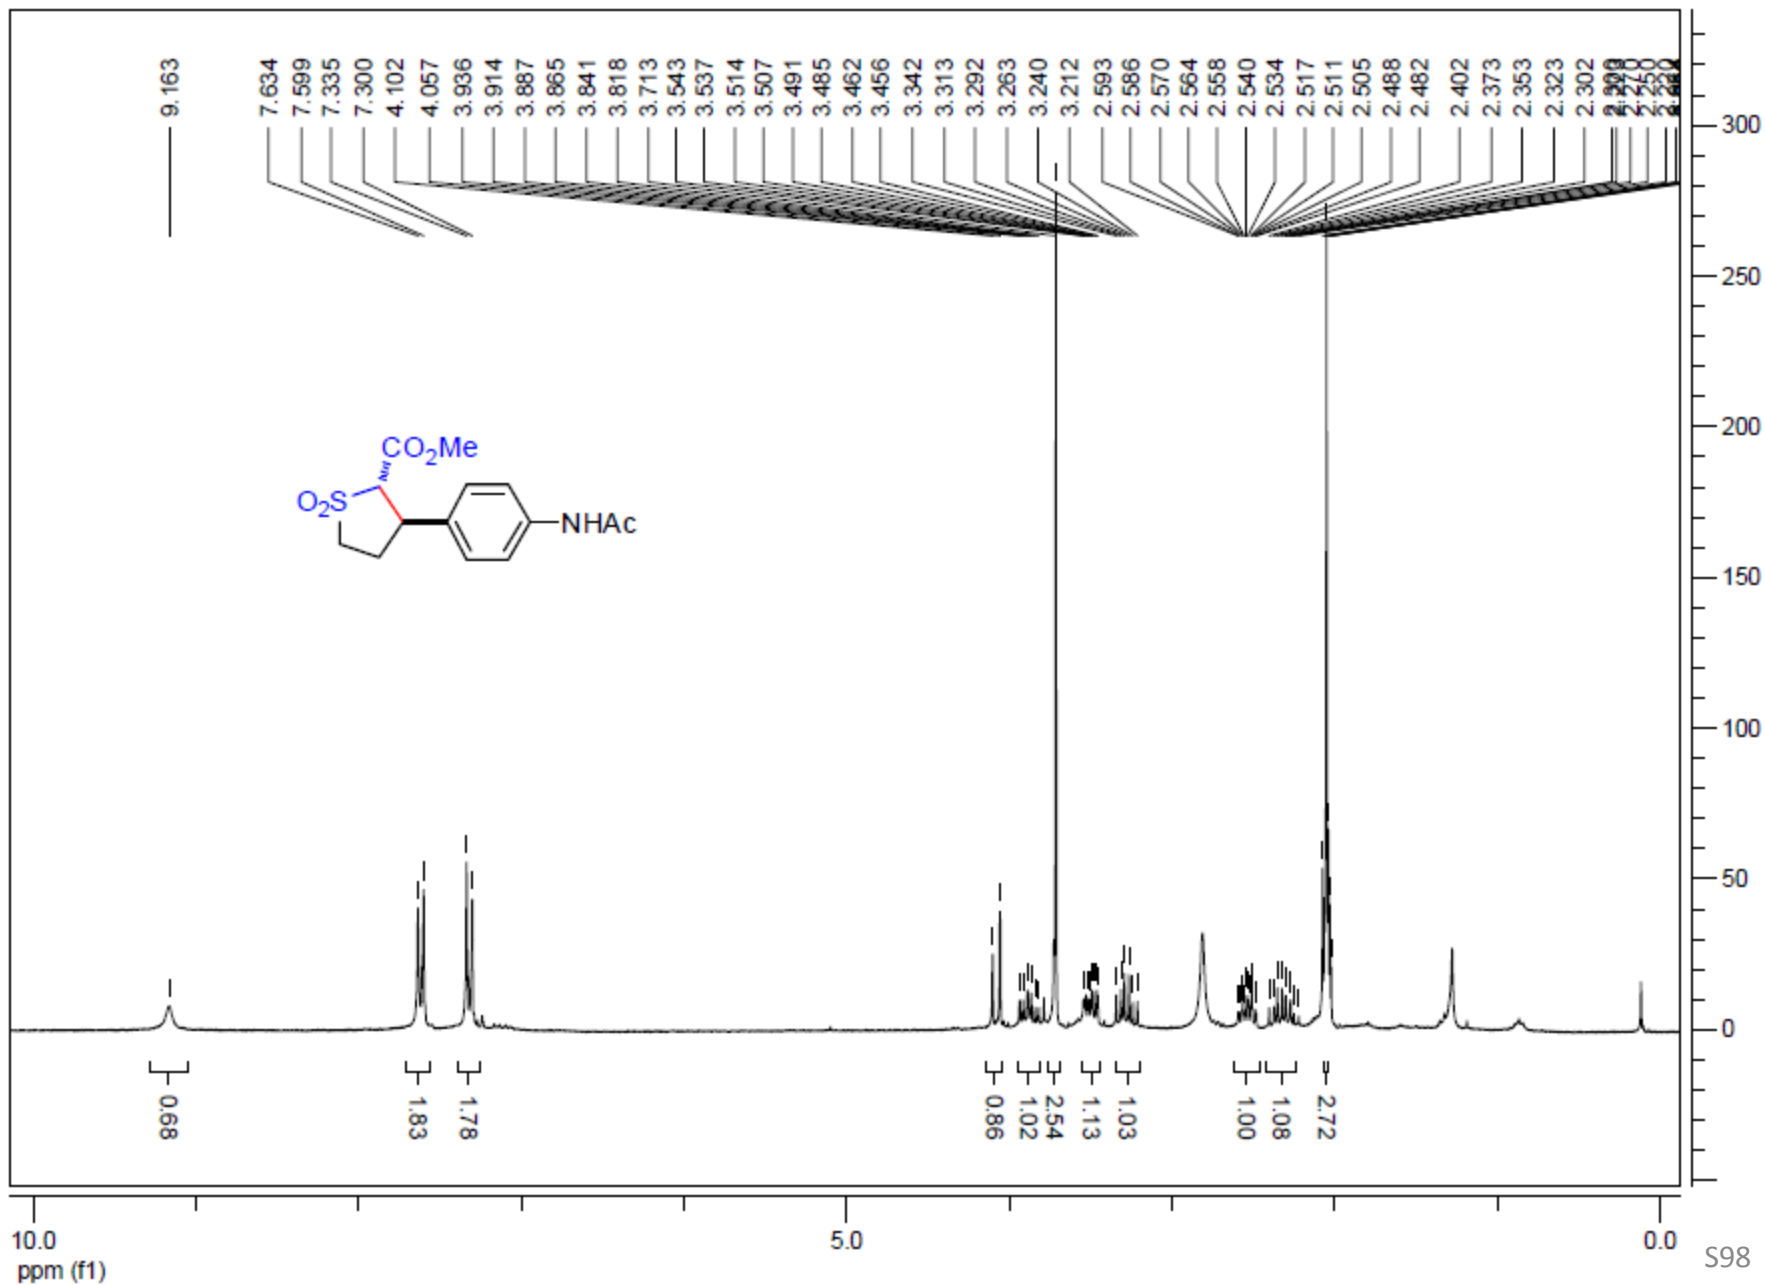

methyl 3-(4-acetamidophenyl)tetrahydrothiophene-2-carboxylate 1,1-dioxide (**2m**)

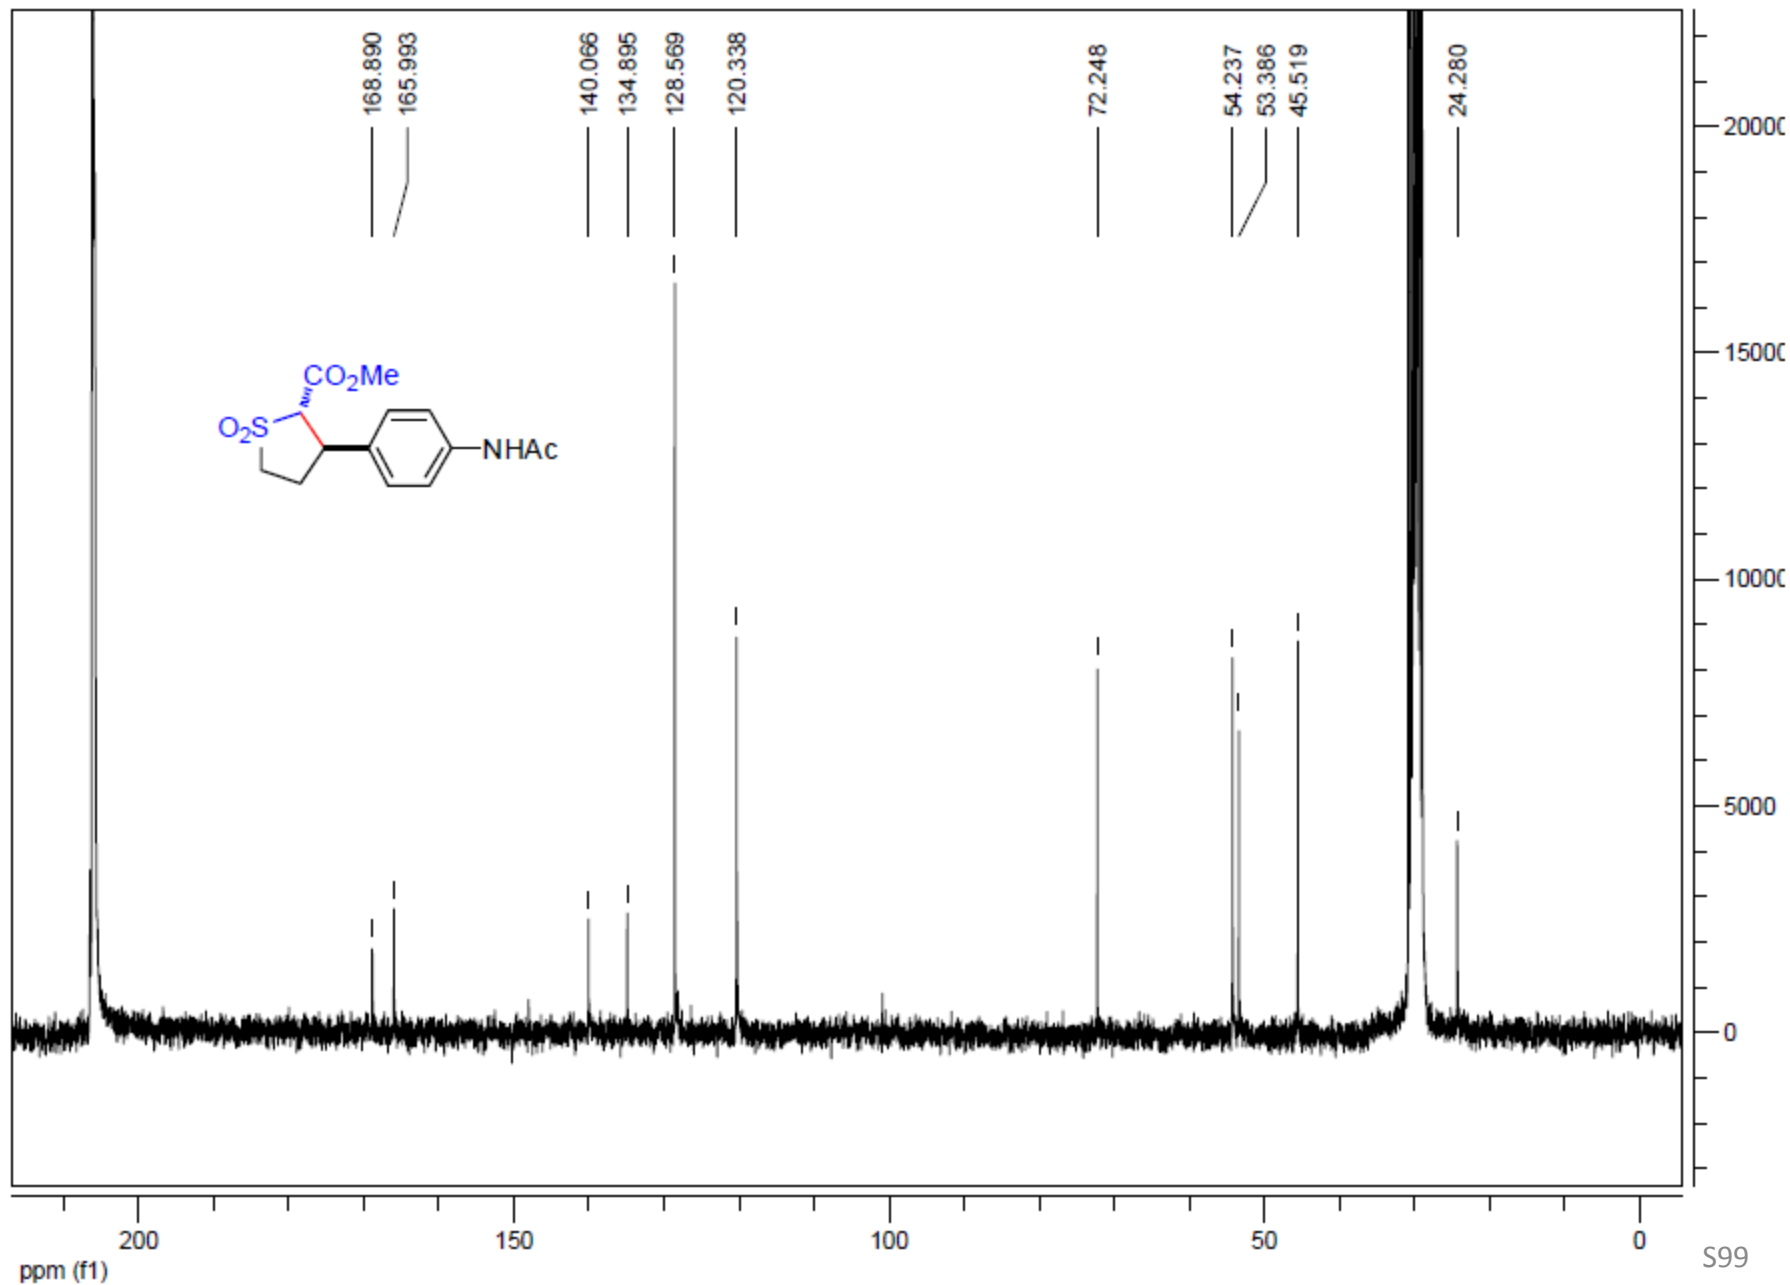



# methyl 3-(4-acetamidophenyl)tetrahydrothiophene-2-carboxylate 1,1-dioxide (2m)

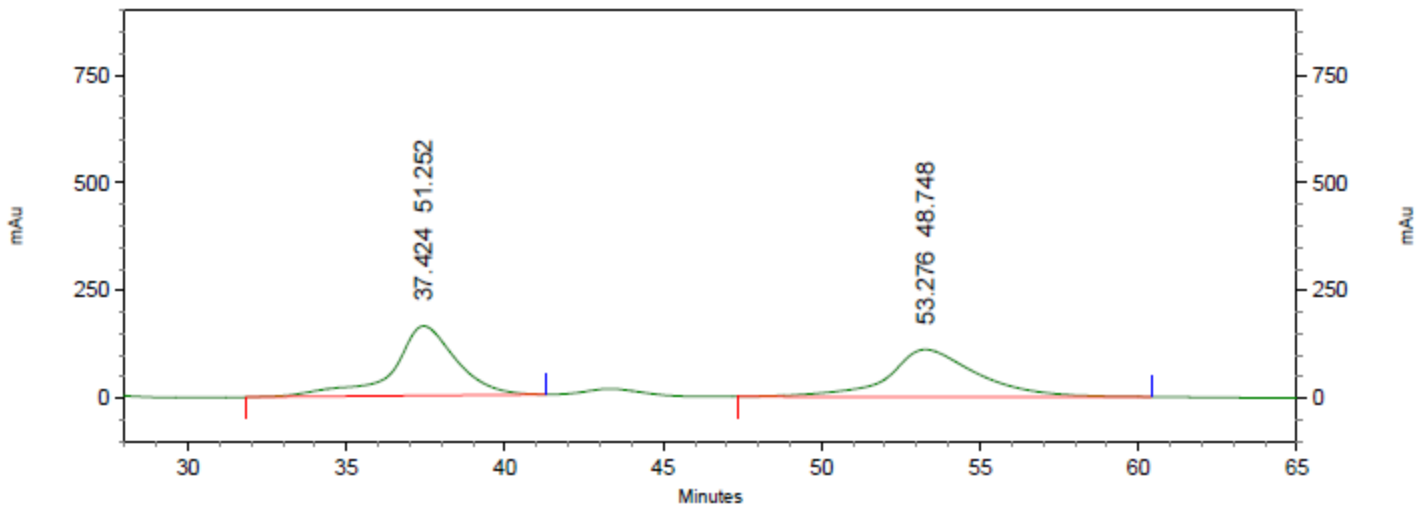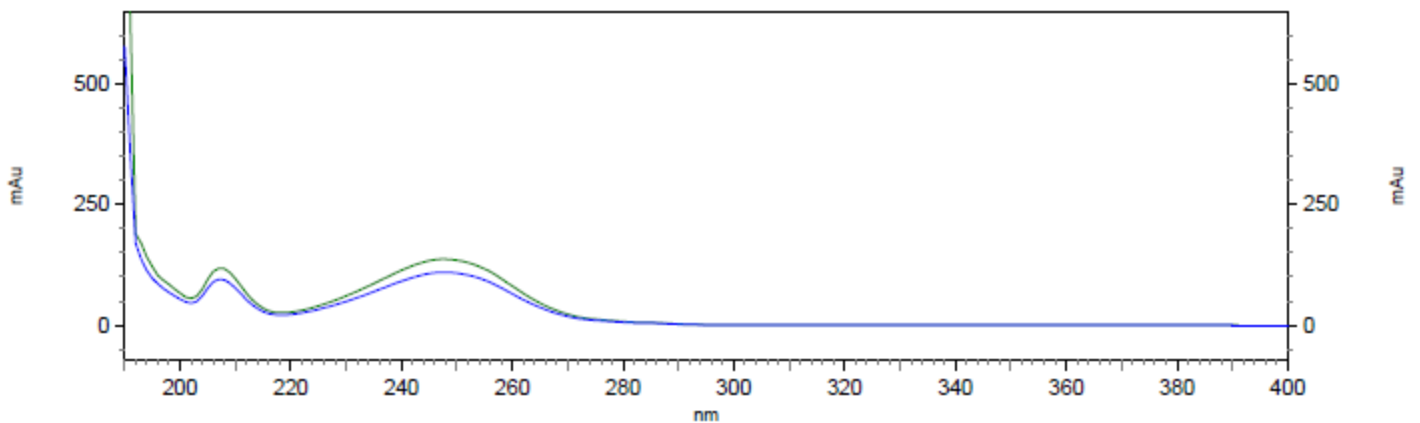

2: 247 nm, 4 nm Results

| Pk # | Retention Time | Area Percent |
|------|----------------|--------------|
| 1    | 37.424         | 51.252       |
| 2    | 53.276         | 48.748       |

|        |         |
|--------|---------|
| Totals | 100.000 |
|--------|---------|

# methyl 3-(4-acetamidophenyl)tetrahydrothiophene-2-carboxylate 1,1-dioxide (2m)

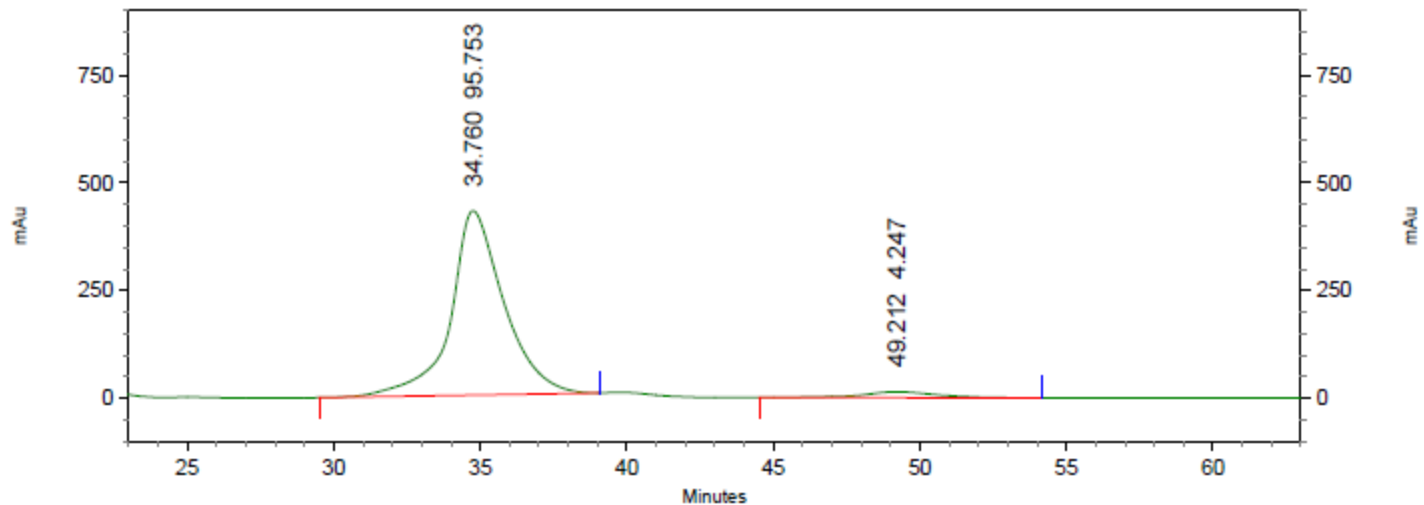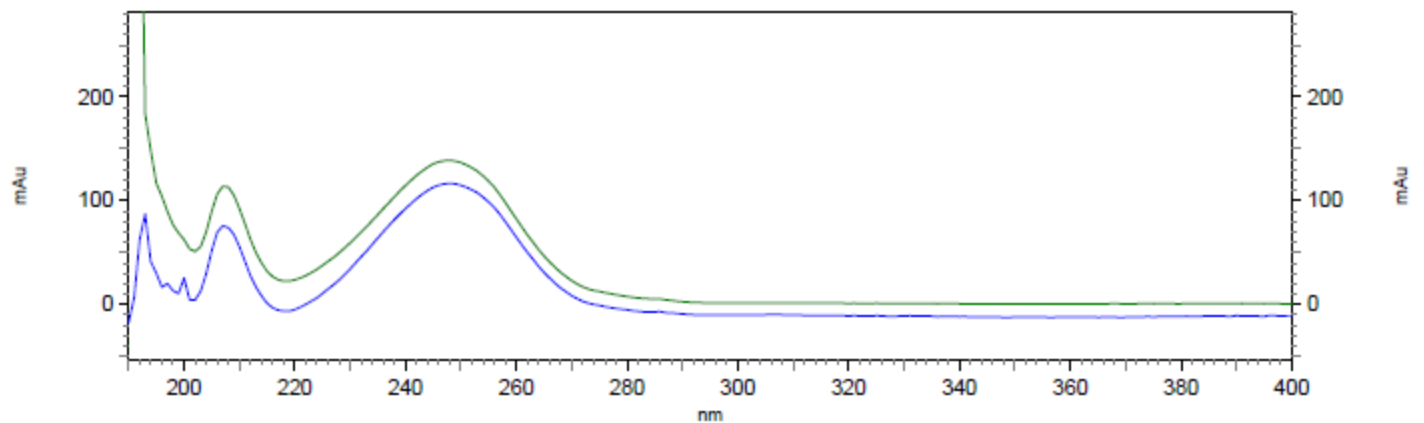

2: 250 nm, 4 nm Results

| Pk #   | Retention Time | Area Percent |
|--------|----------------|--------------|
| 1      | 34.760         | 95.753       |
| 2      | 49.212         | 4.247        |
| Totals |                | 100.000      |

methyl 3-(1-phenyl-1,2,3-triazol-4-yl)tetrahydrothiophene-2-carboxylate 1,1-dioxide (**2n**)

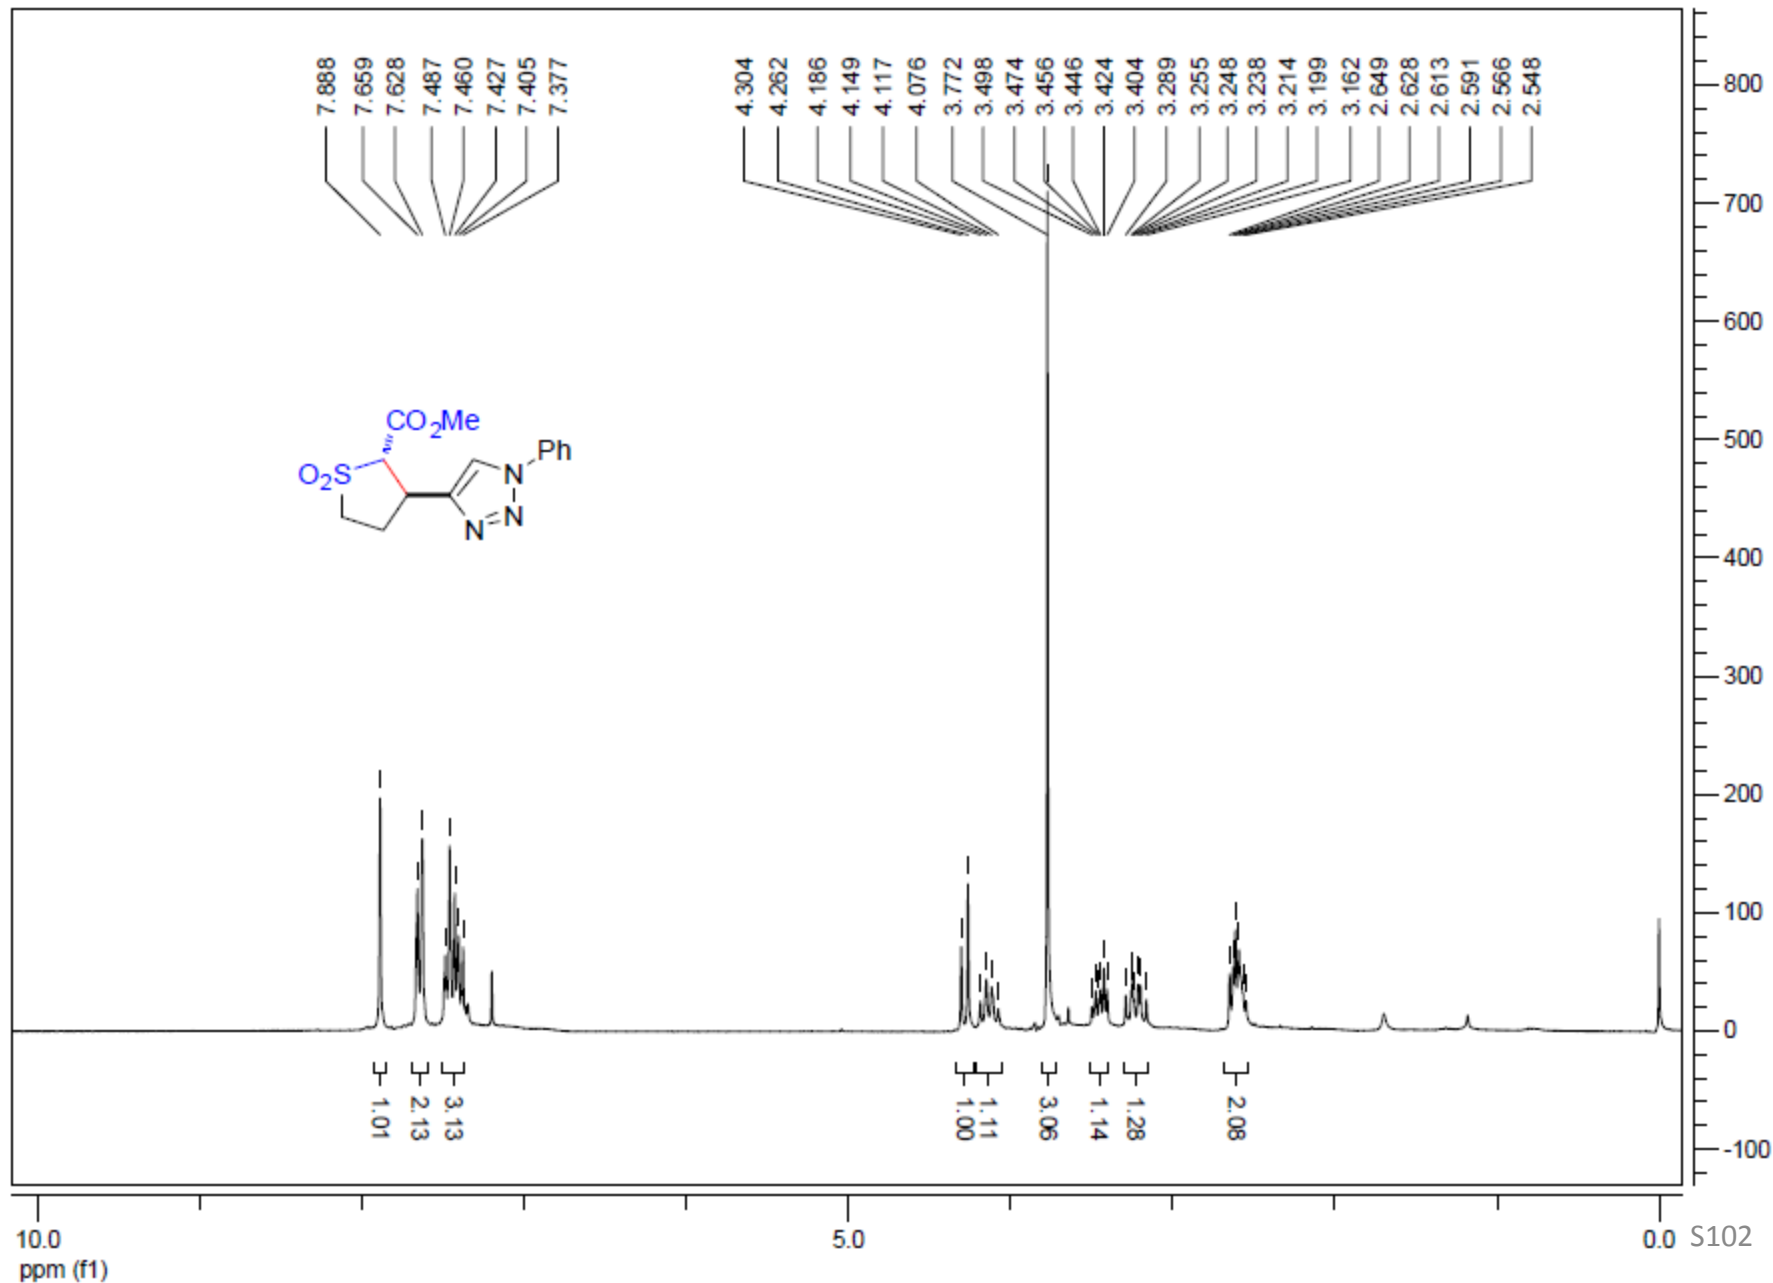

methyl 3-(1-phenyl-1H-1,2,3-triazol-4-yl)tetrahydrothiophene-2-carboxylate 1,1-dioxide (**2n**)

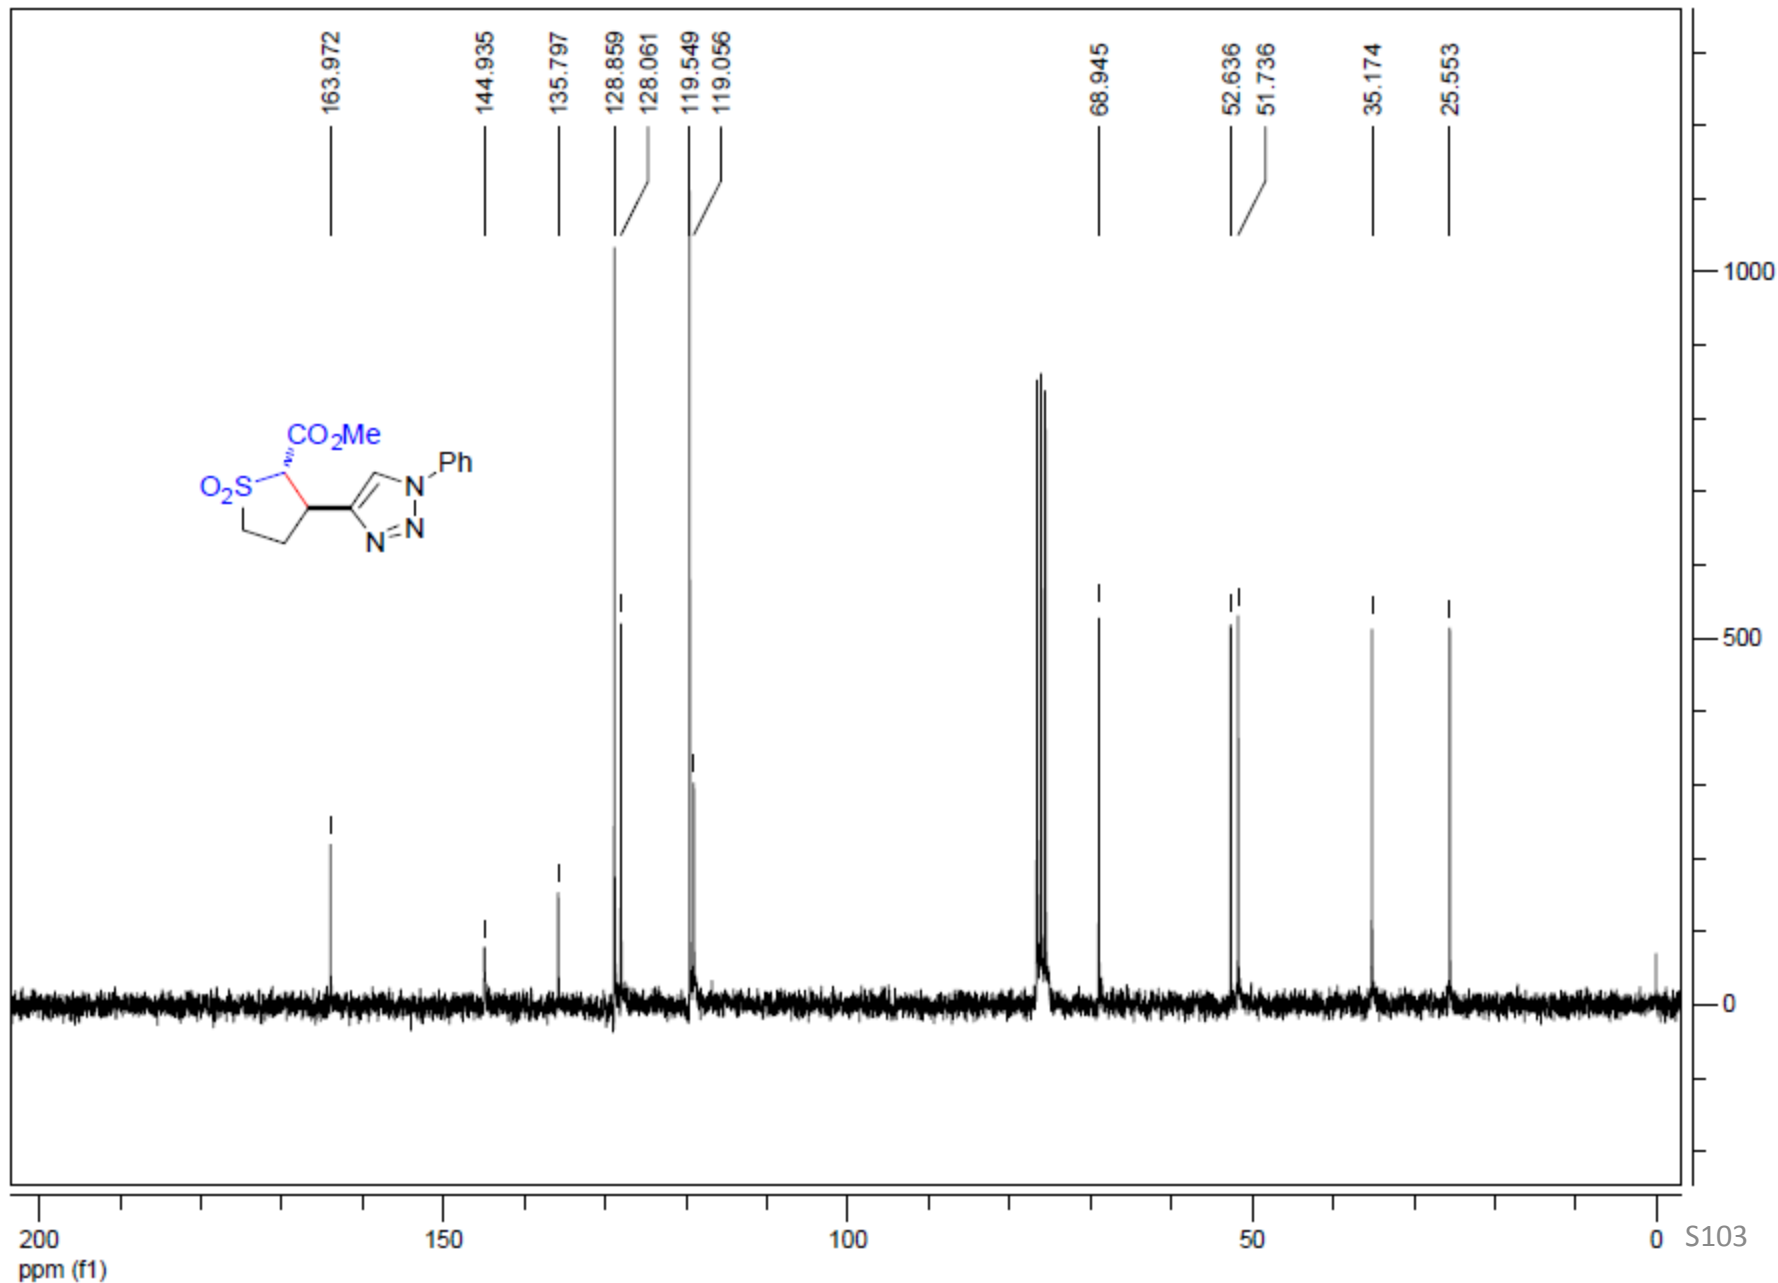

# methyl 3-(1-phenyl-1H-1,2,3-triazol-4-yl)tetrahydrothiophene-2-carboxylate 1,1-dioxide (**2n**)

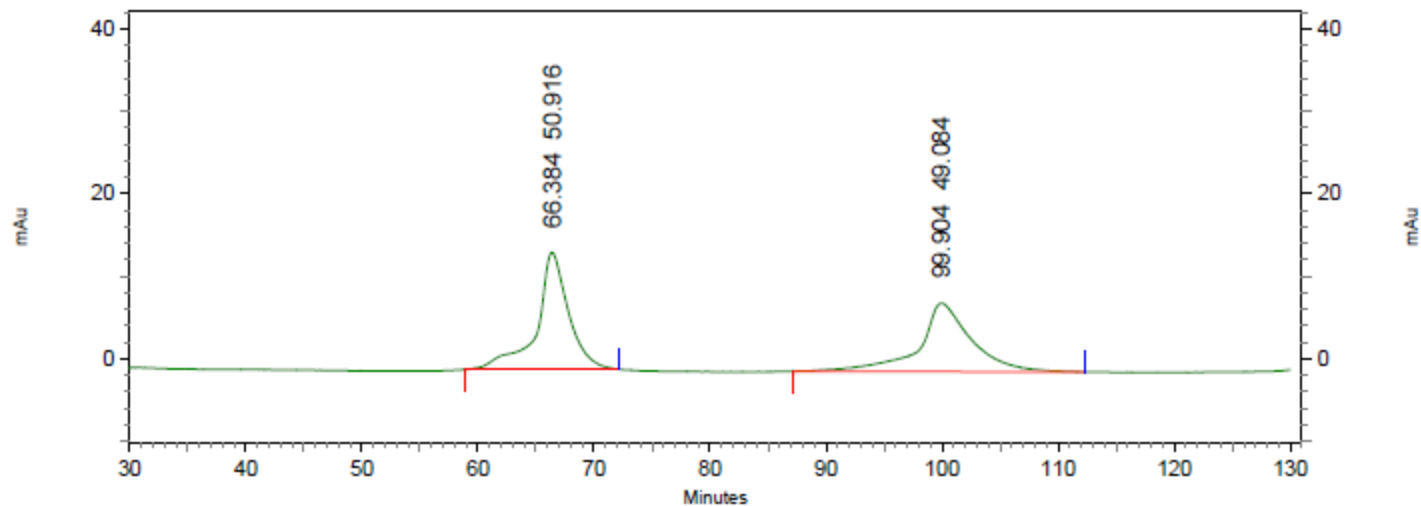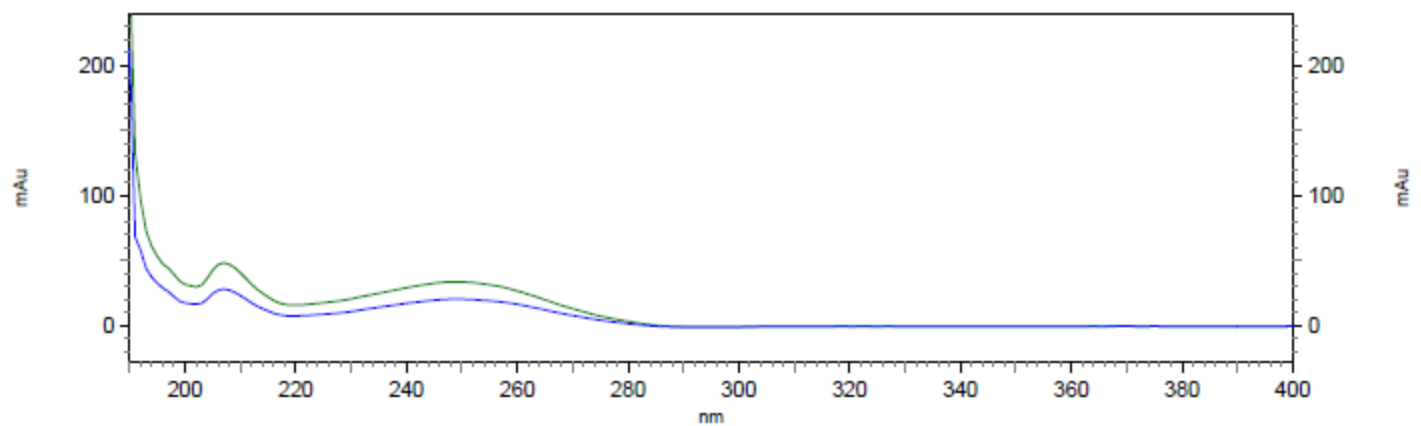

1: 245 nm, 4 nm Results

| Pk # | Retention Time | Area Percent |
|------|----------------|--------------|
| 1    | 66.384         | 50.916       |
| 2    | 99.904         | 49.084       |

|        |  |         |
|--------|--|---------|
| Totals |  | 100.000 |
|--------|--|---------|

# methyl 3-(1-phenyl-1H-1,2,3-triazol-4-yl)tetrahydrothiophene-2-carboxylate 1,1-dioxide (**2n**)

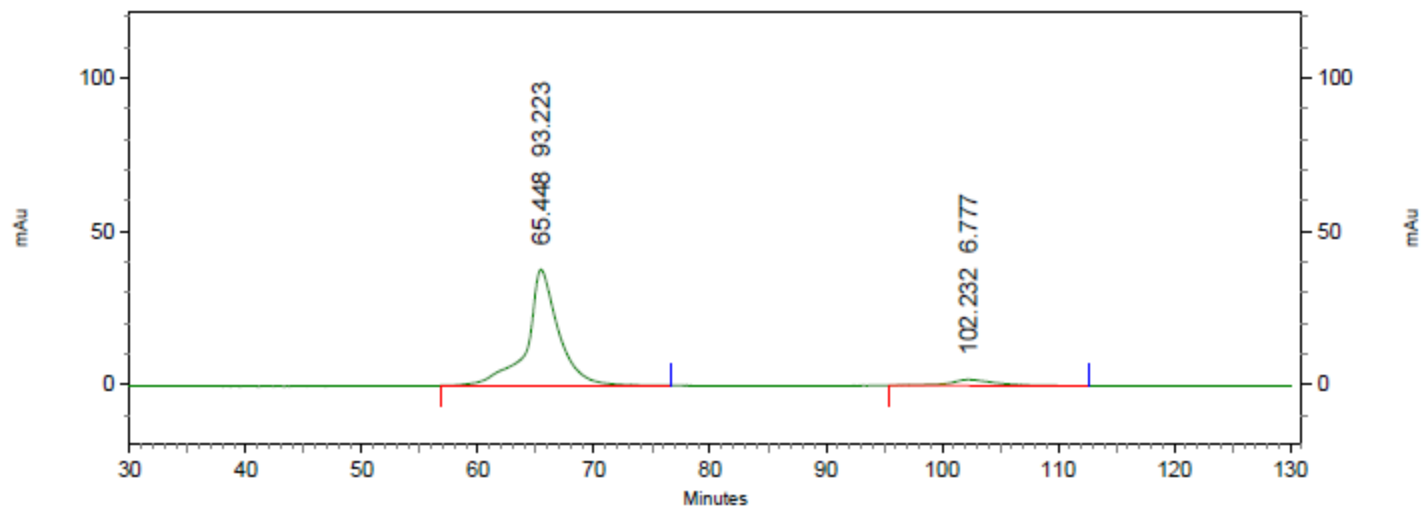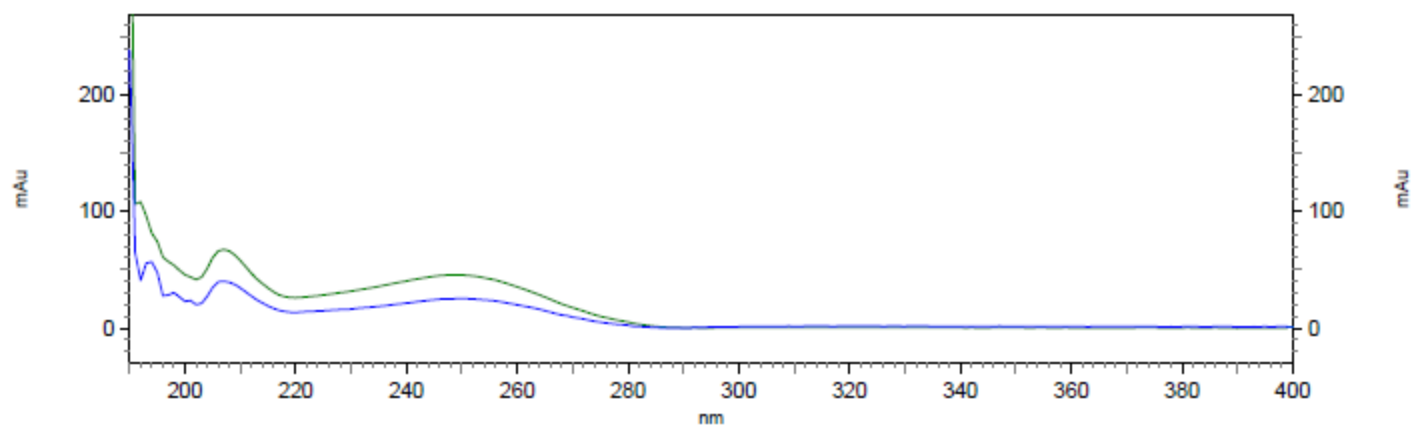

1: 244 nm, 4 nm Results

| Pk # | Retention Time | Area Percent |
|------|----------------|--------------|
| 1    | 65.448         | 93.223       |
| 2    | 102.232        | 6.777        |

|        |         |
|--------|---------|
| Totals | 100.000 |
|--------|---------|

# methyl 3-vinyltetrahydrothiophene-2-carboxylate 1,1-dioxide (**2o**)

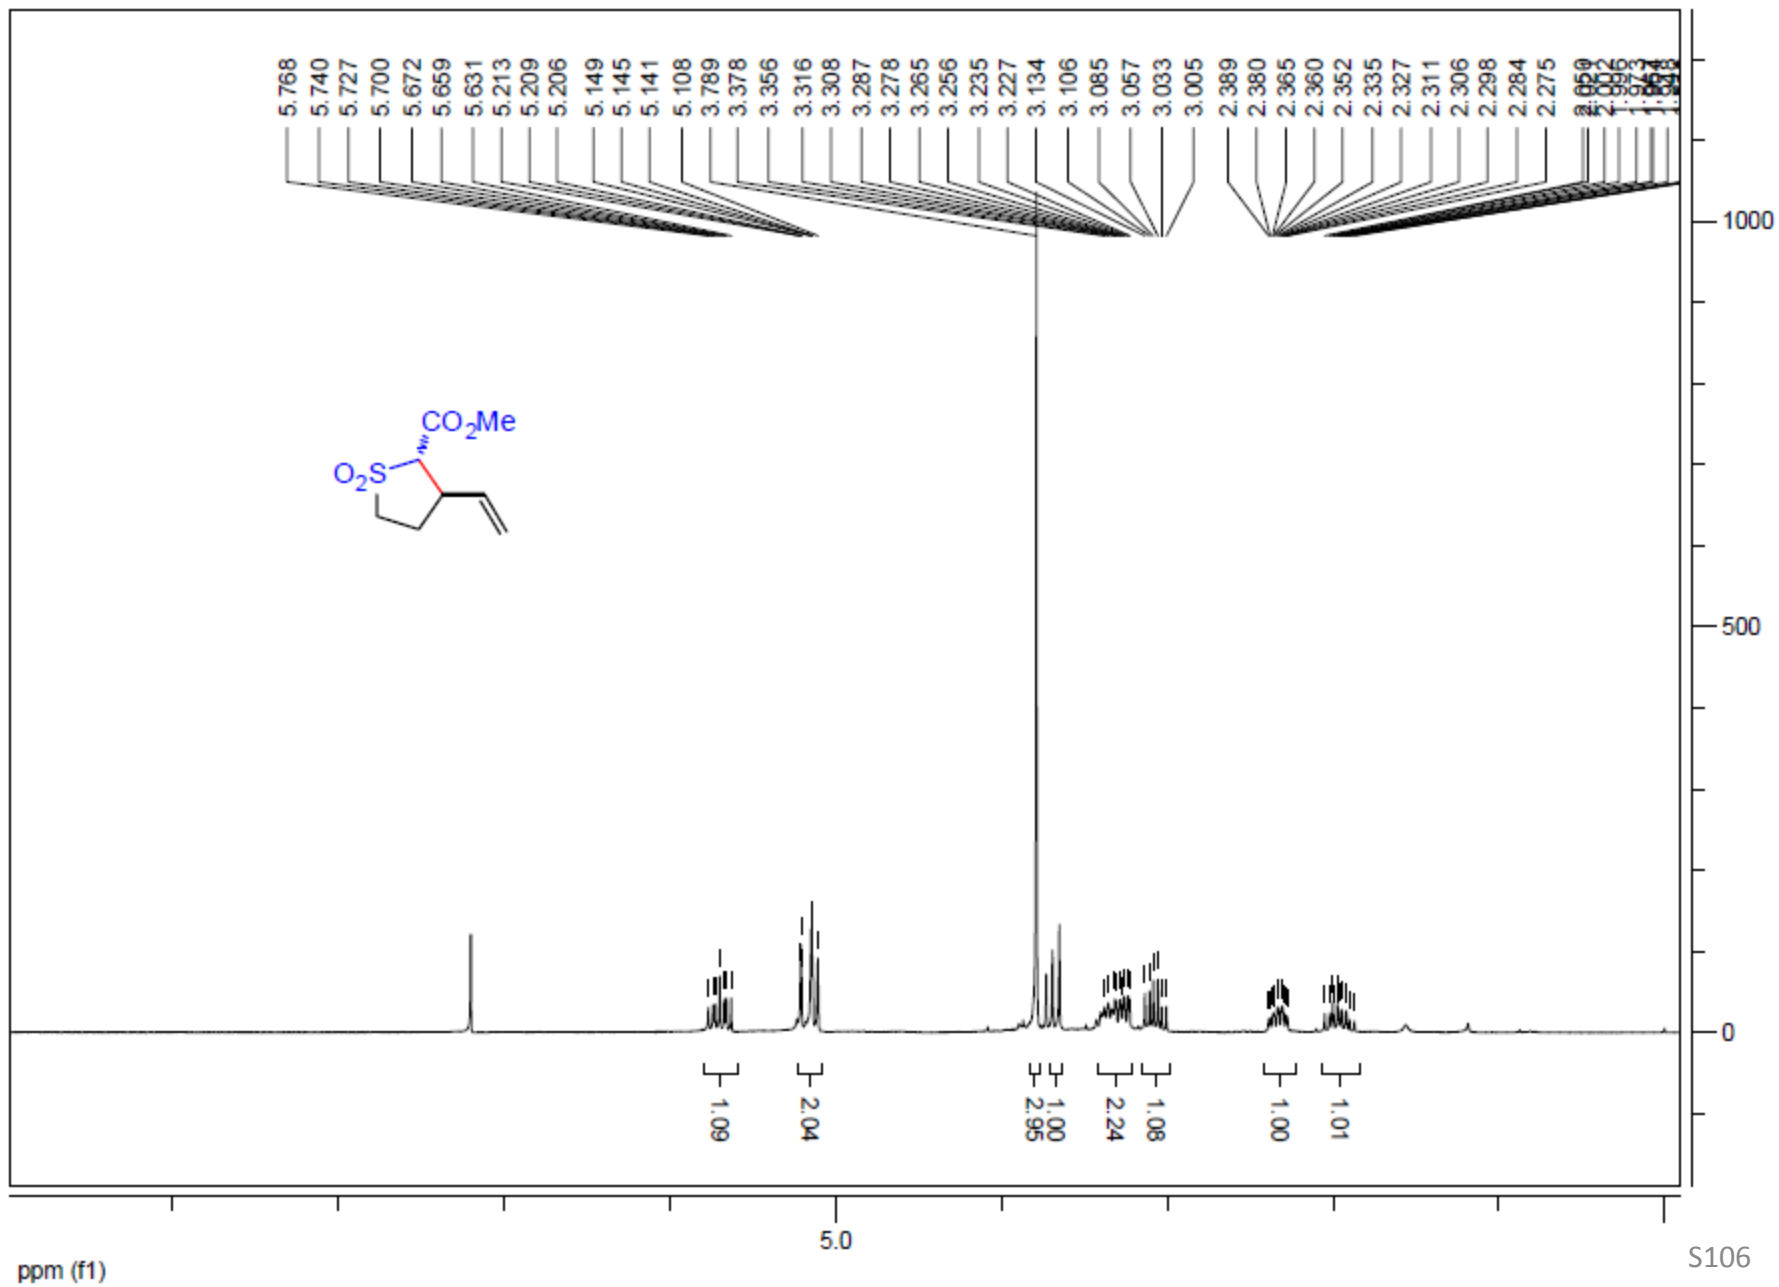

# methyl 3-vinyltetrahydrothiophene-2-carboxylate 1,1-dioxide (**2o**)

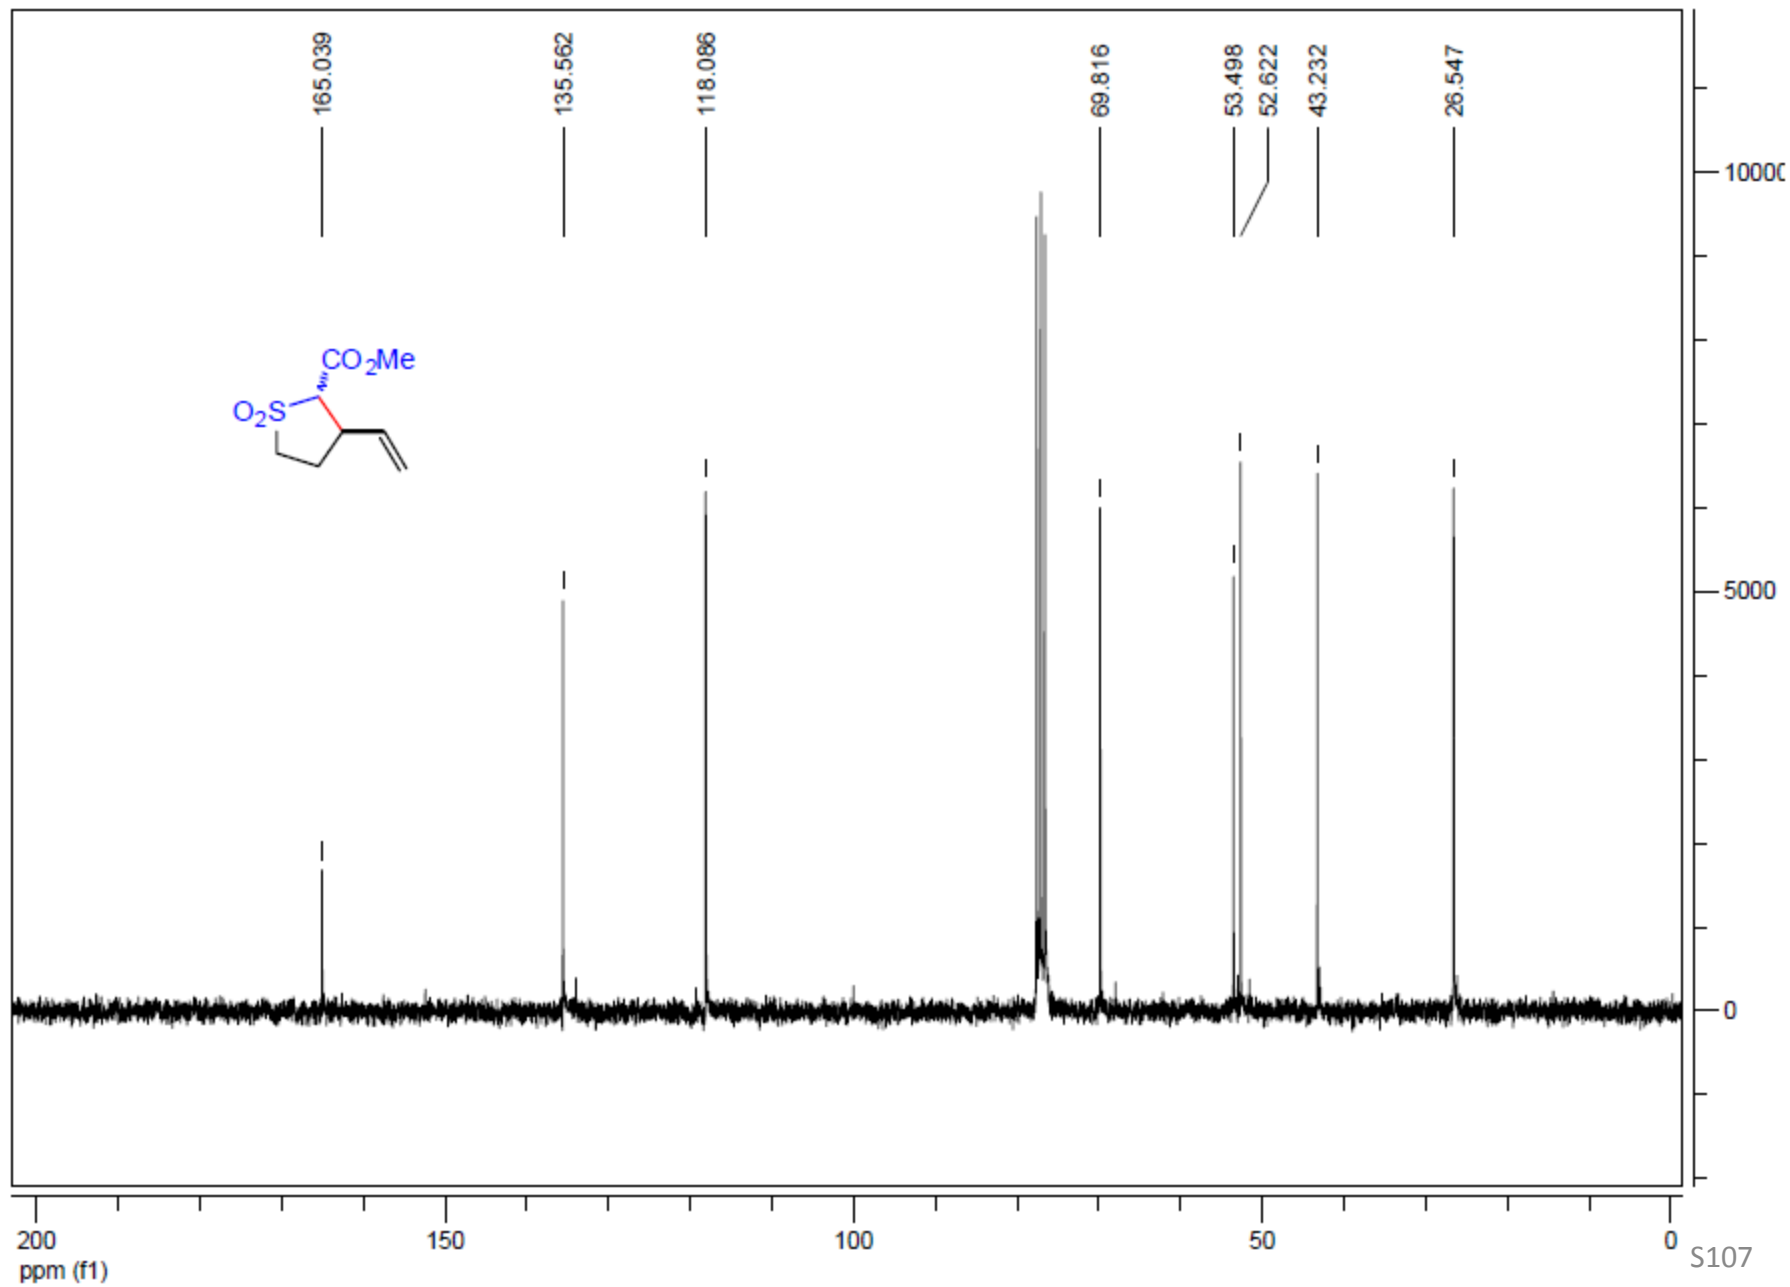



# methyl 3-vinyltetrahydrothiophene-2-carboxylate 1,1-dioxide (**2o**)

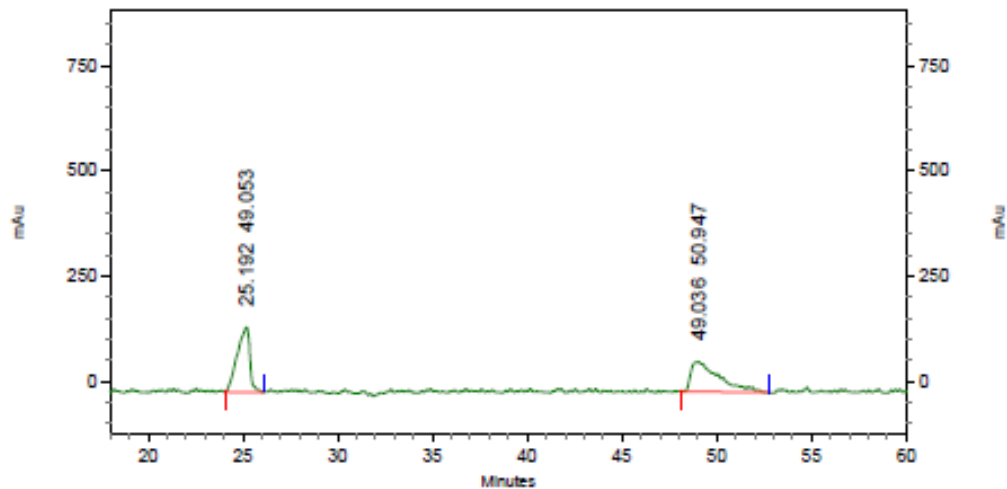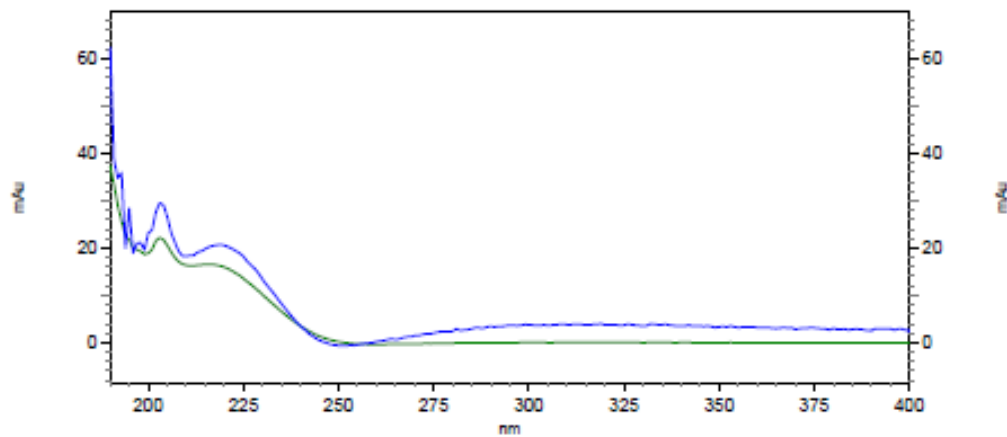

2: 213 nm, 4 nm

Results

| Name | Retention Time | Area Percent | Pk # |
|------|----------------|--------------|------|
|      | 25.192         | 49.053       | 1    |
|      | 49.036         | 50.947       | 2    |

|        |  |         |  |
|--------|--|---------|--|
| Totals |  | 100.000 |  |
|--------|--|---------|--|

# methyl 3-vinyltetrahydrothiophene-2-carboxylate 1,1-dioxide (**2o**)

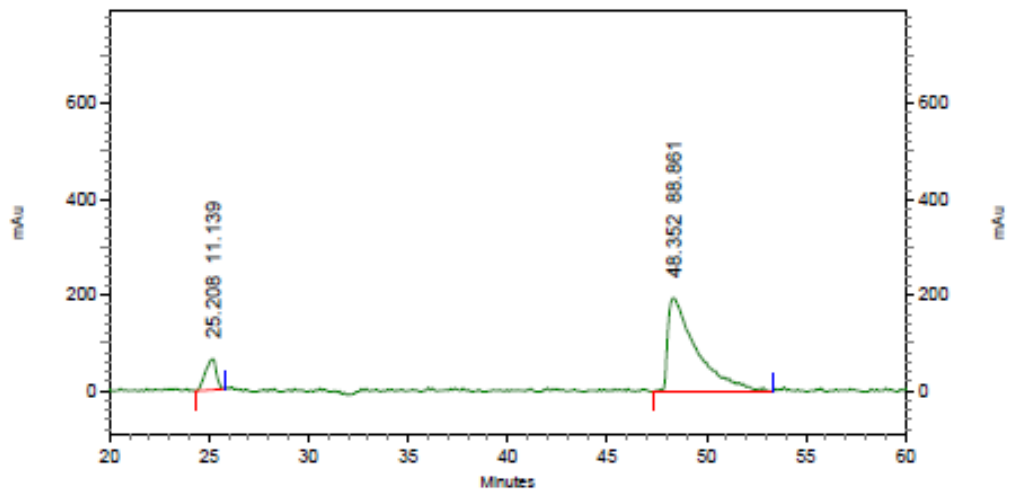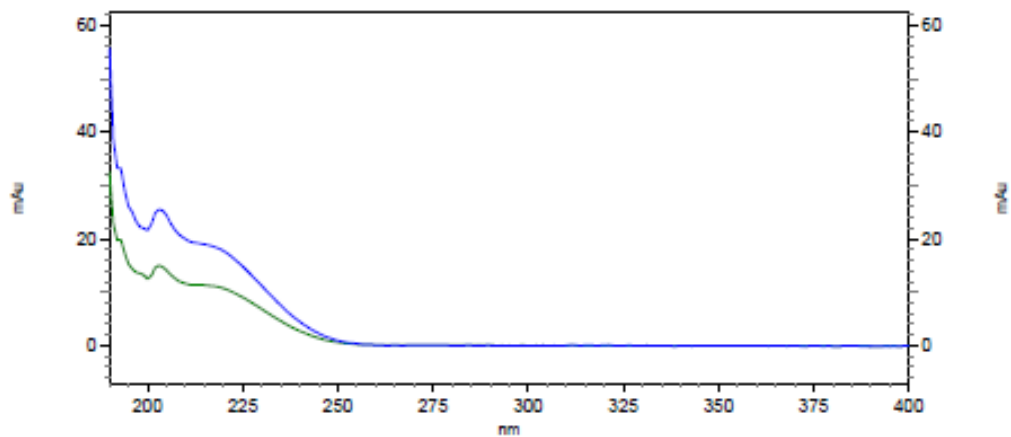

2: 213 nm, 4 nm

Results

| Name | Retention Time | Area Percent | Pk # |
|------|----------------|--------------|------|
|      | 25.208         | 11.139       | 1    |
|      | 48.352         | 88.861       | 2    |

| Totals | Area Percent |
|--------|--------------|
|        | 100.000      |

methyl 3-(prop-1-en-2-yl)tetrahydrothiophene-2-carboxylate **(2p)**

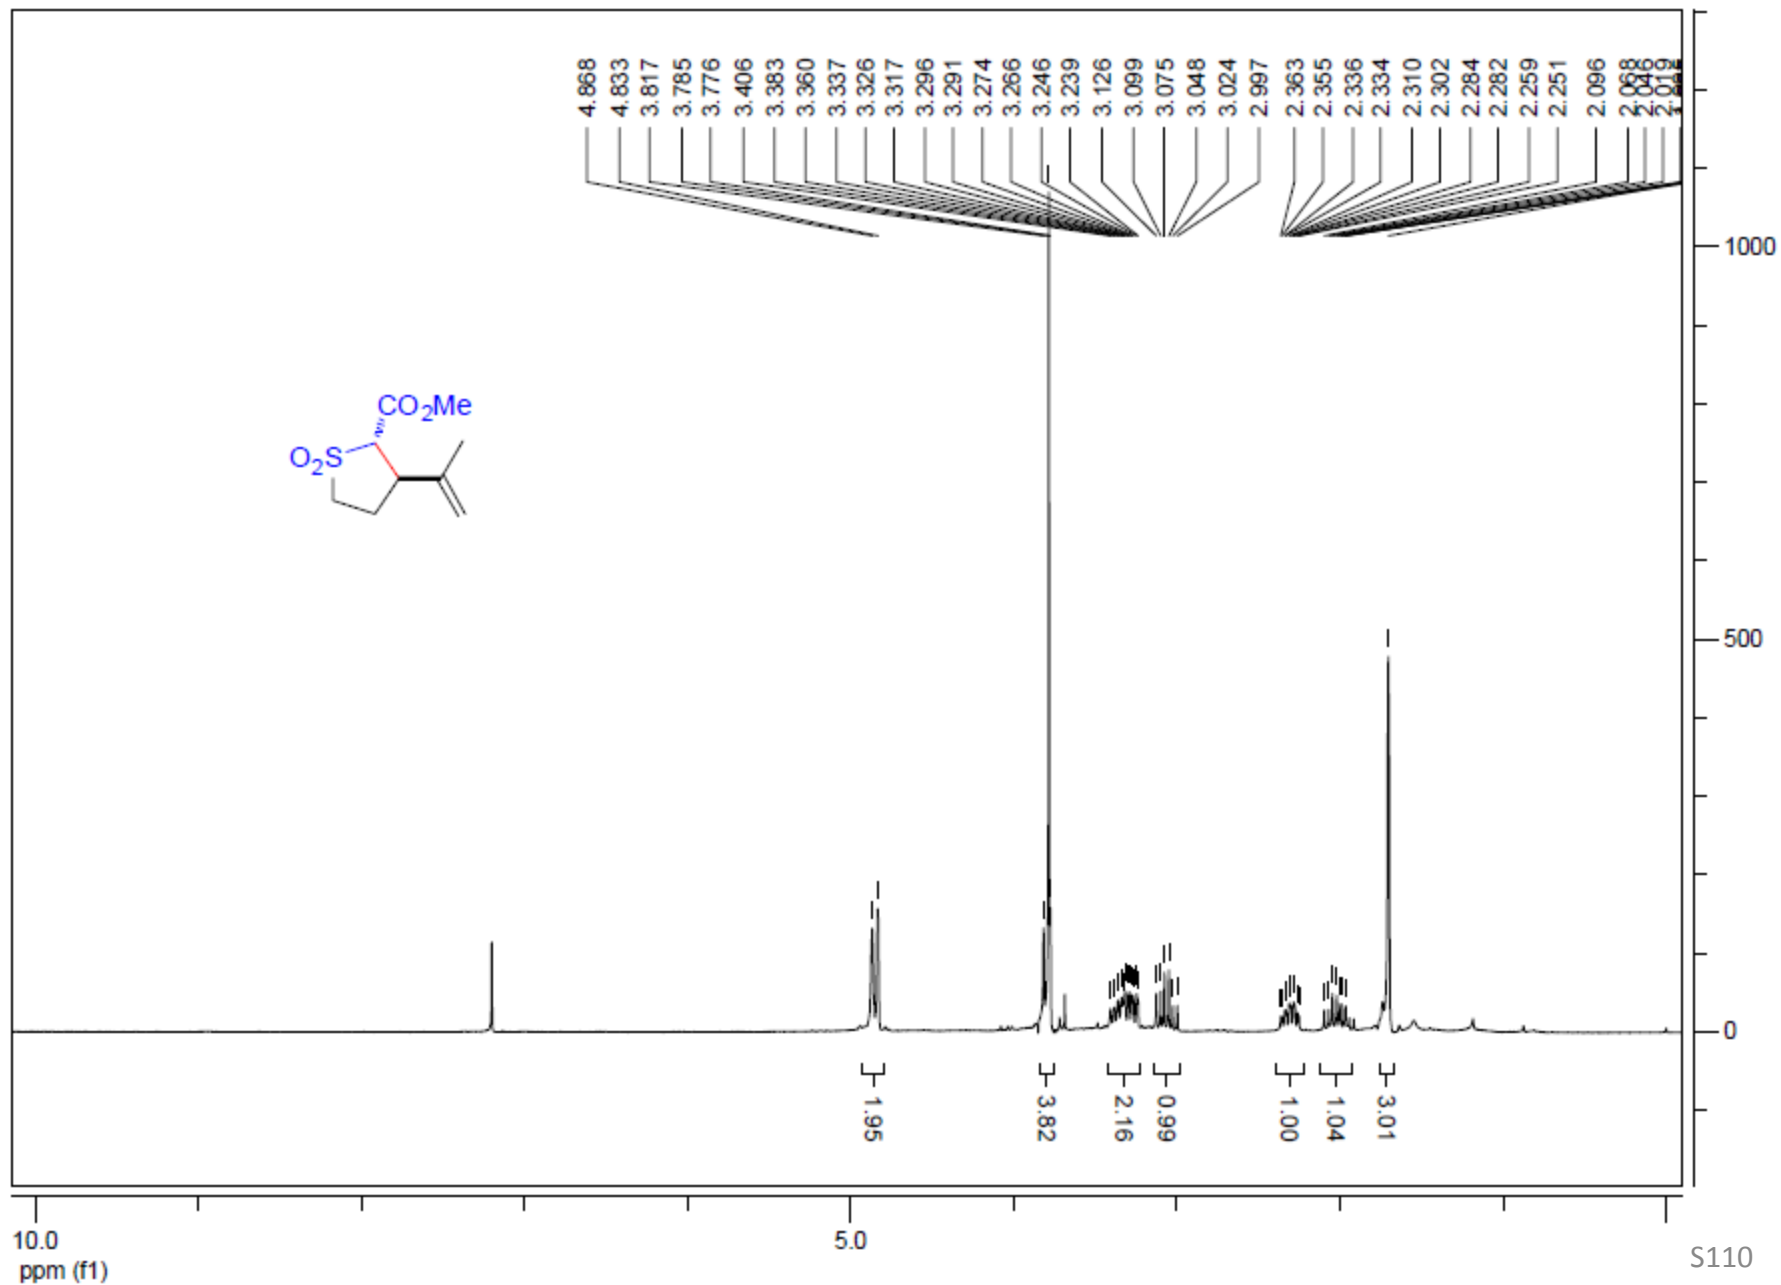

methyl 3-(prop-1-en-2-yl)tetrahydrothiophene-2-carboxylate 1,1-dioxide (**2p**)

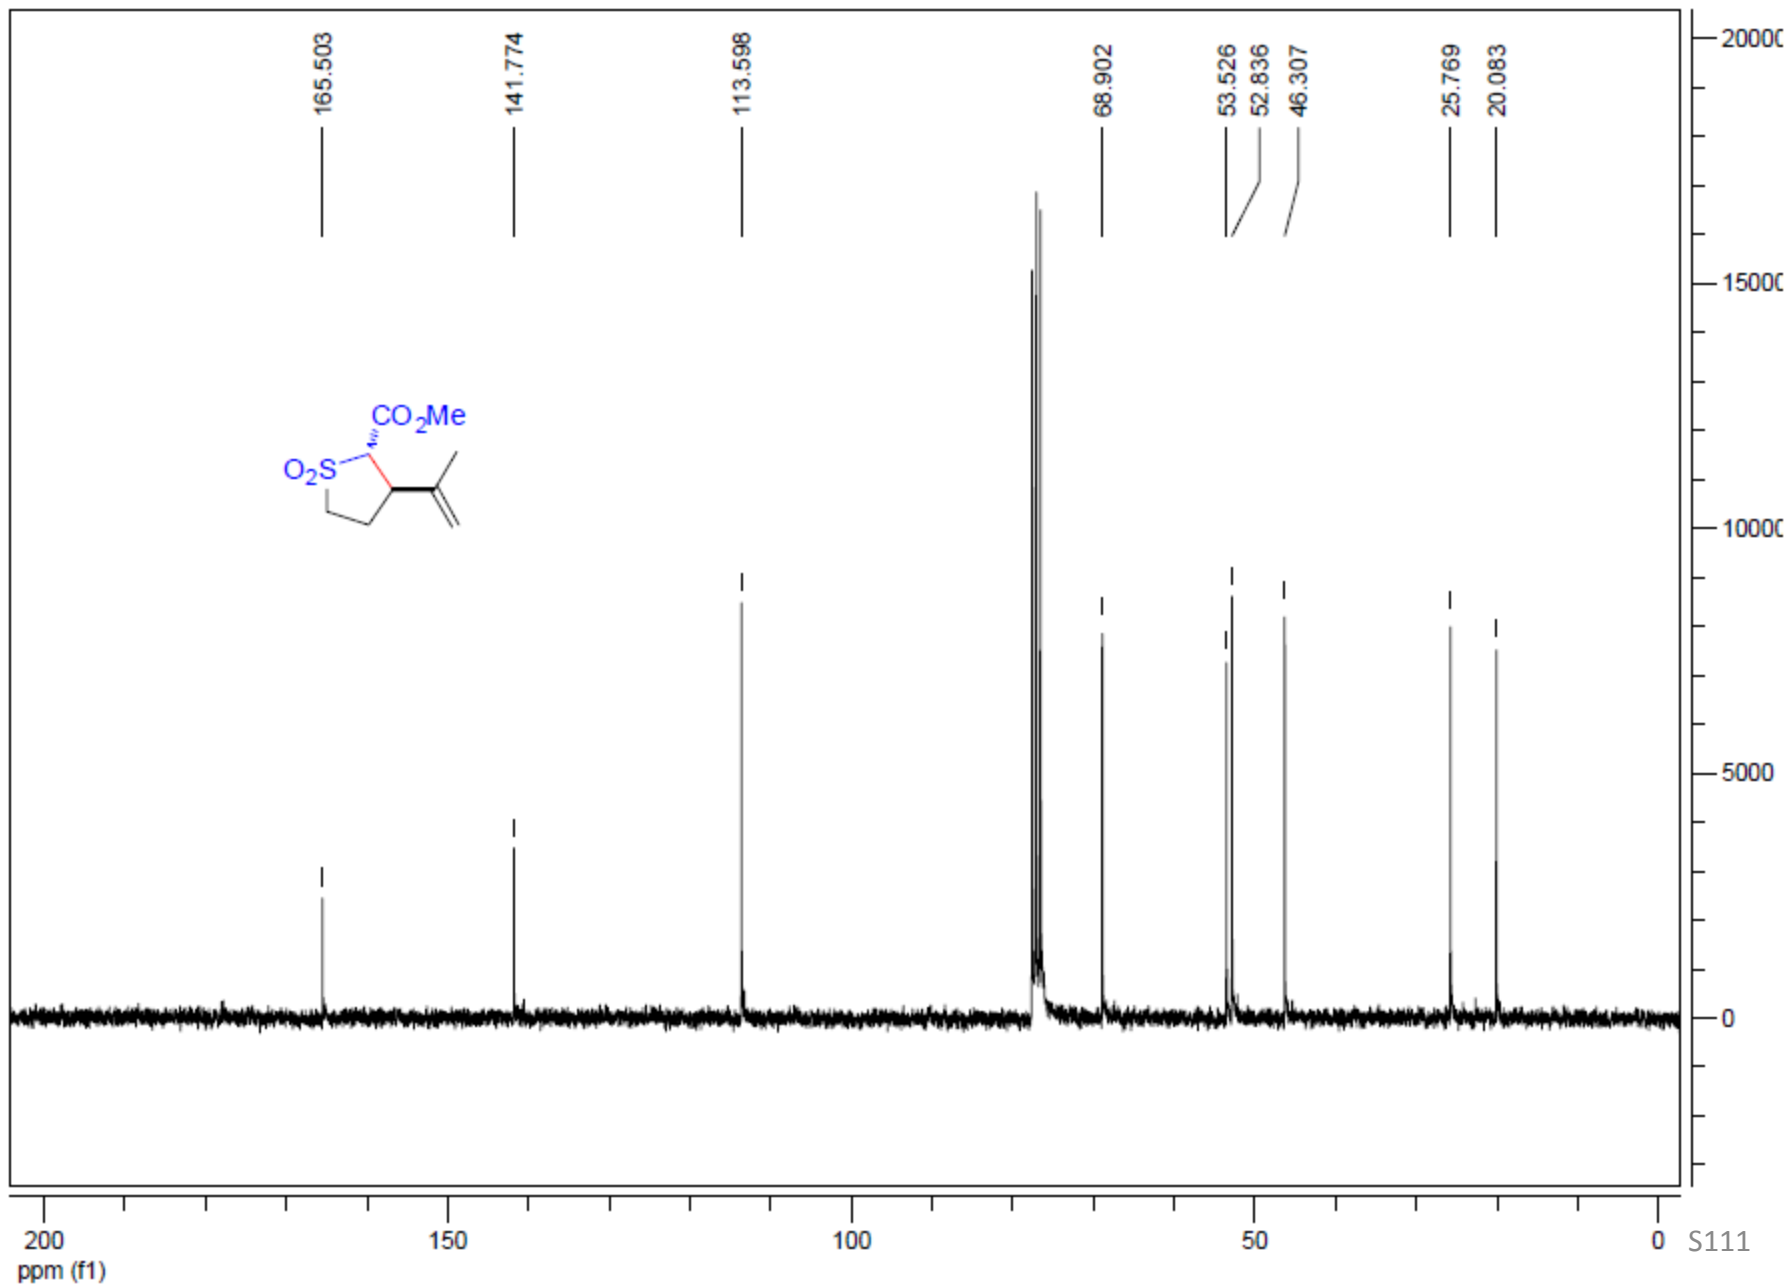

# methyl 3-(prop-1-en-2-yl)tetrahydrothiophene-2-carboxylate 1,1-dioxide (**2p**)

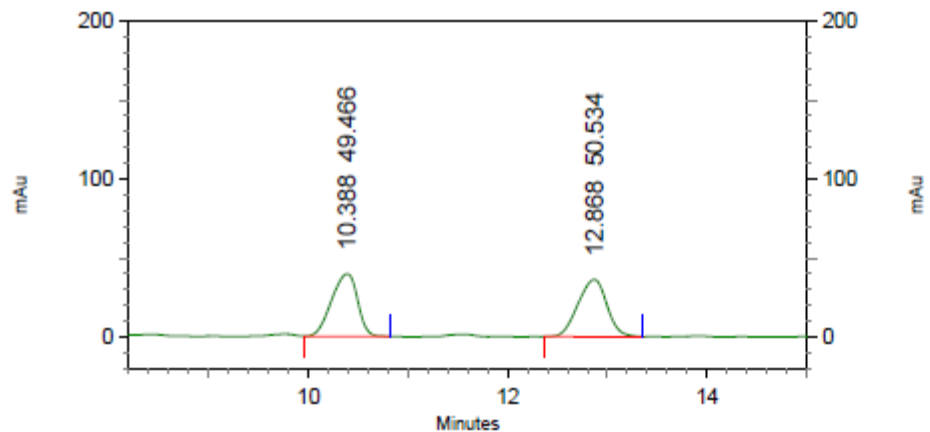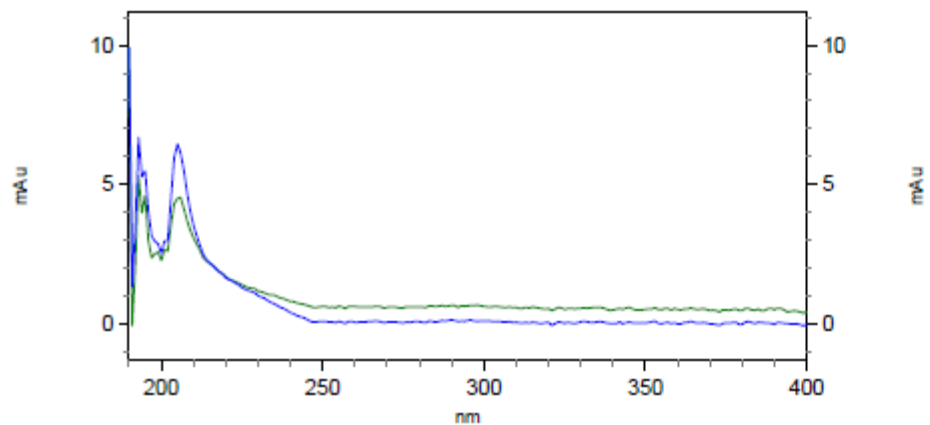

2: 227 nm, 4 nm

Results

| Name | Retention Time | Area Percent | Pk # |
|------|----------------|--------------|------|
|      | 10.388         | 49.466       | 1    |
|      | 12.868         | 50.534       | 2    |

|        |  |         |  |
|--------|--|---------|--|
| Totals |  | 100.000 |  |
|--------|--|---------|--|

# methyl 3-(prop-1-en-2-yl)tetrahydrothiophene-2-carboxylate 1,1-dioxide (**2p**)

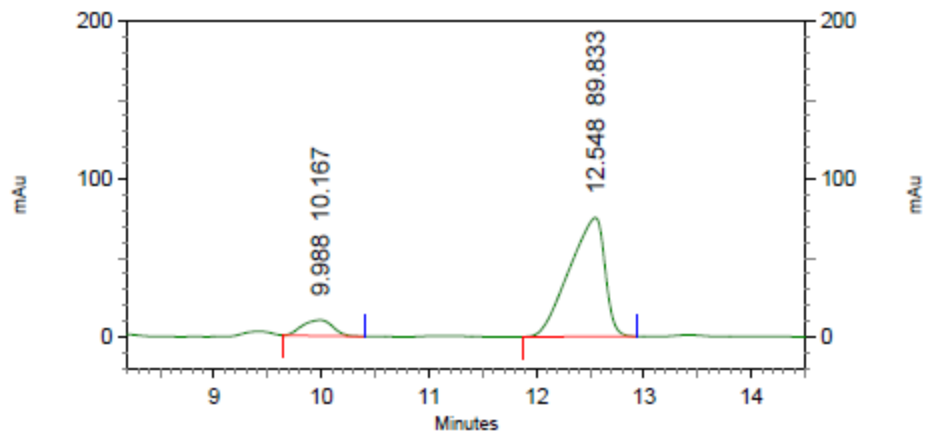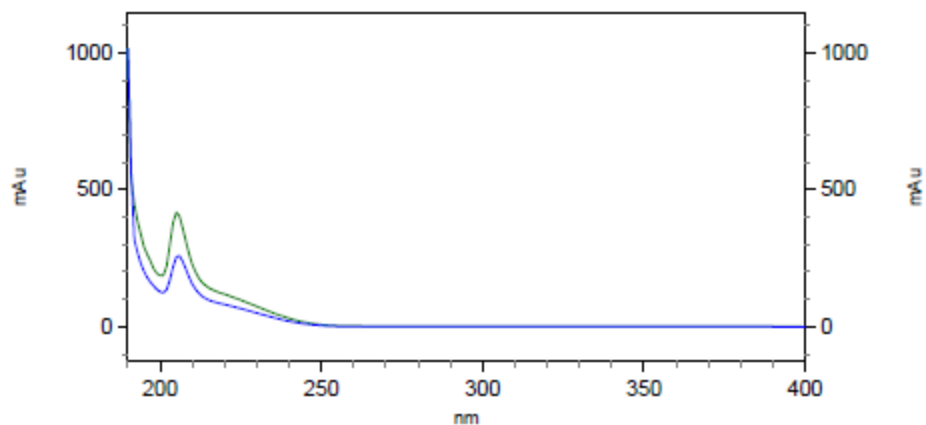

2: 227 nm, 4 nm

Results

| Name | Retention Time | Area Percent | Pk # |
|------|----------------|--------------|------|
|      | 9.988          | 10.167       | 1    |
|      | 12.548         | 89.833       | 2    |

|        |  |         |  |
|--------|--|---------|--|
| Totals |  | 100.000 |  |
|--------|--|---------|--|

methyl 3-(propa-1,2-dien-1-yl)tetrahydrothiophene-2-carboxylate 1,1-dioxide (**2q**)

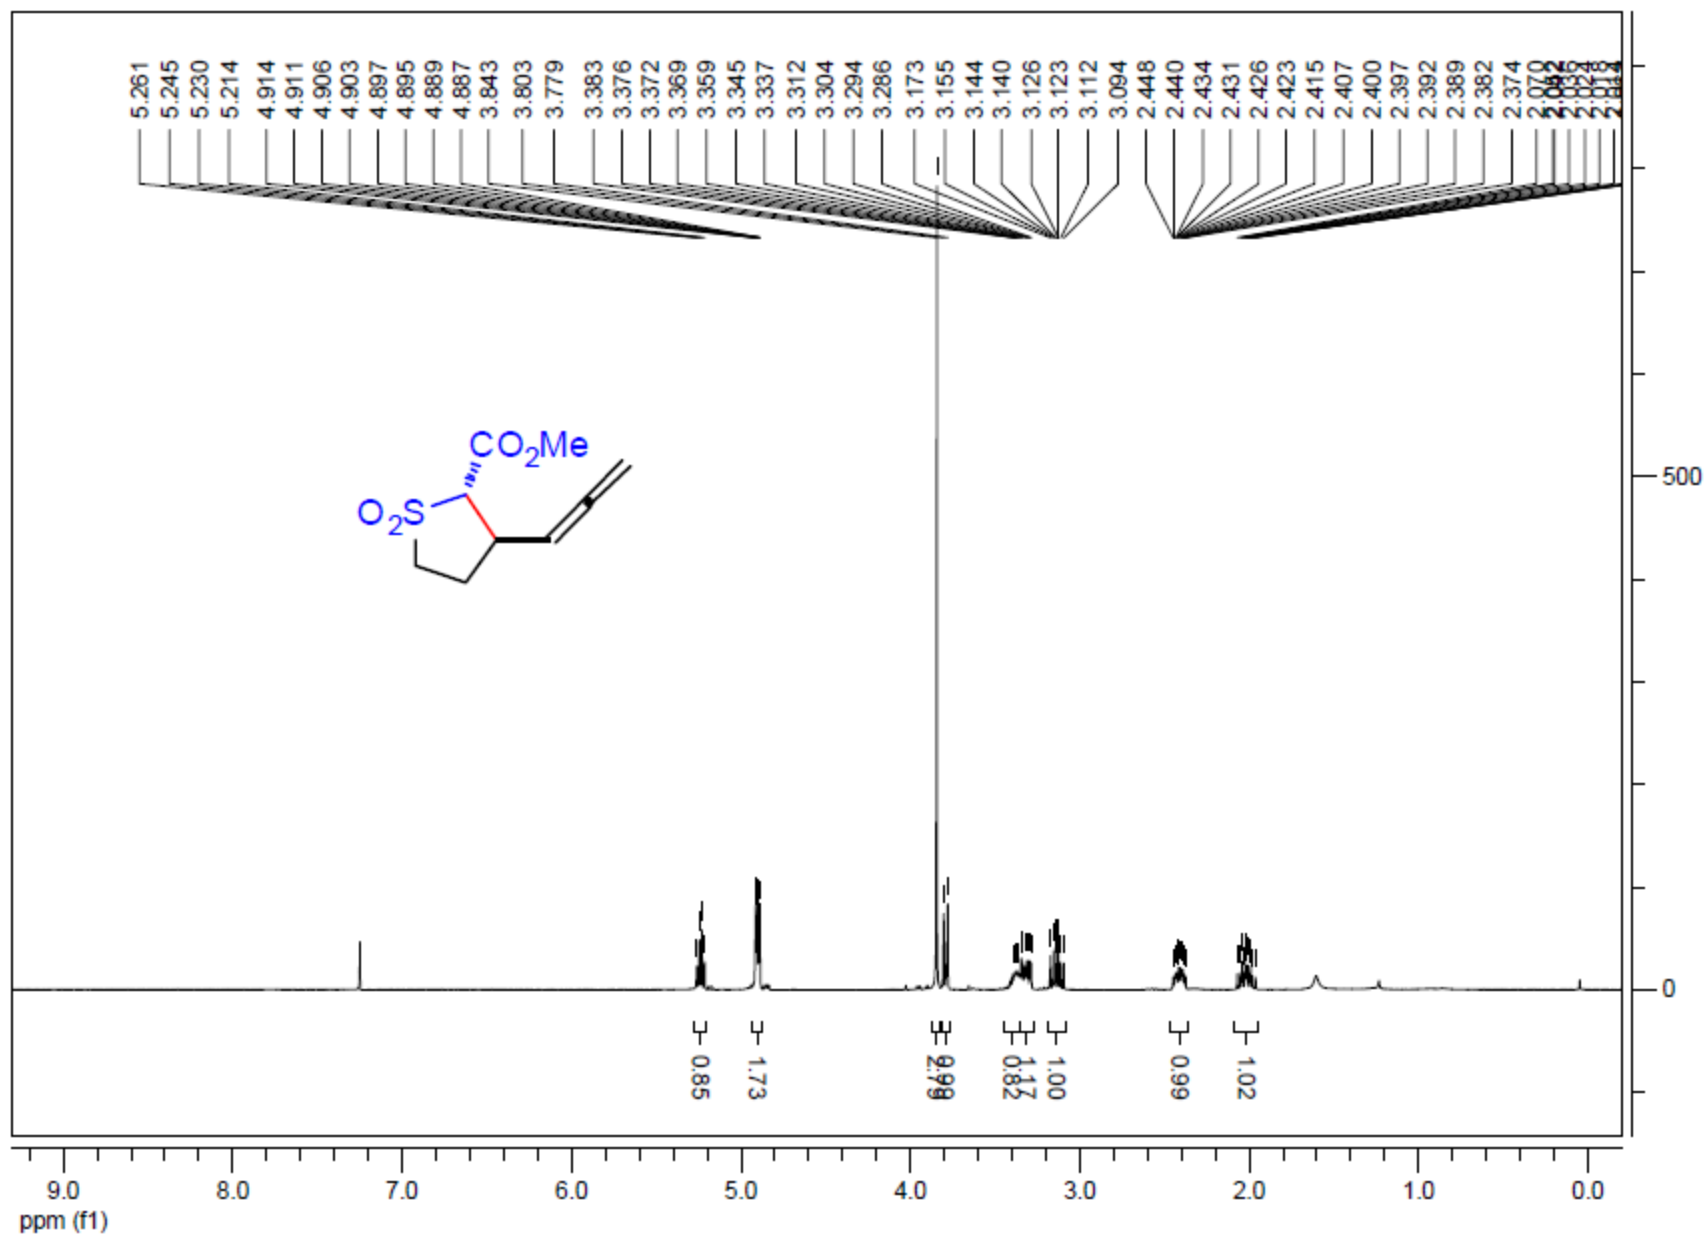

methyl 3-(propa-1,2-dien-1-yl)tetrahydrothiophene-2-carboxylate 1,1-dioxide (**2q**)

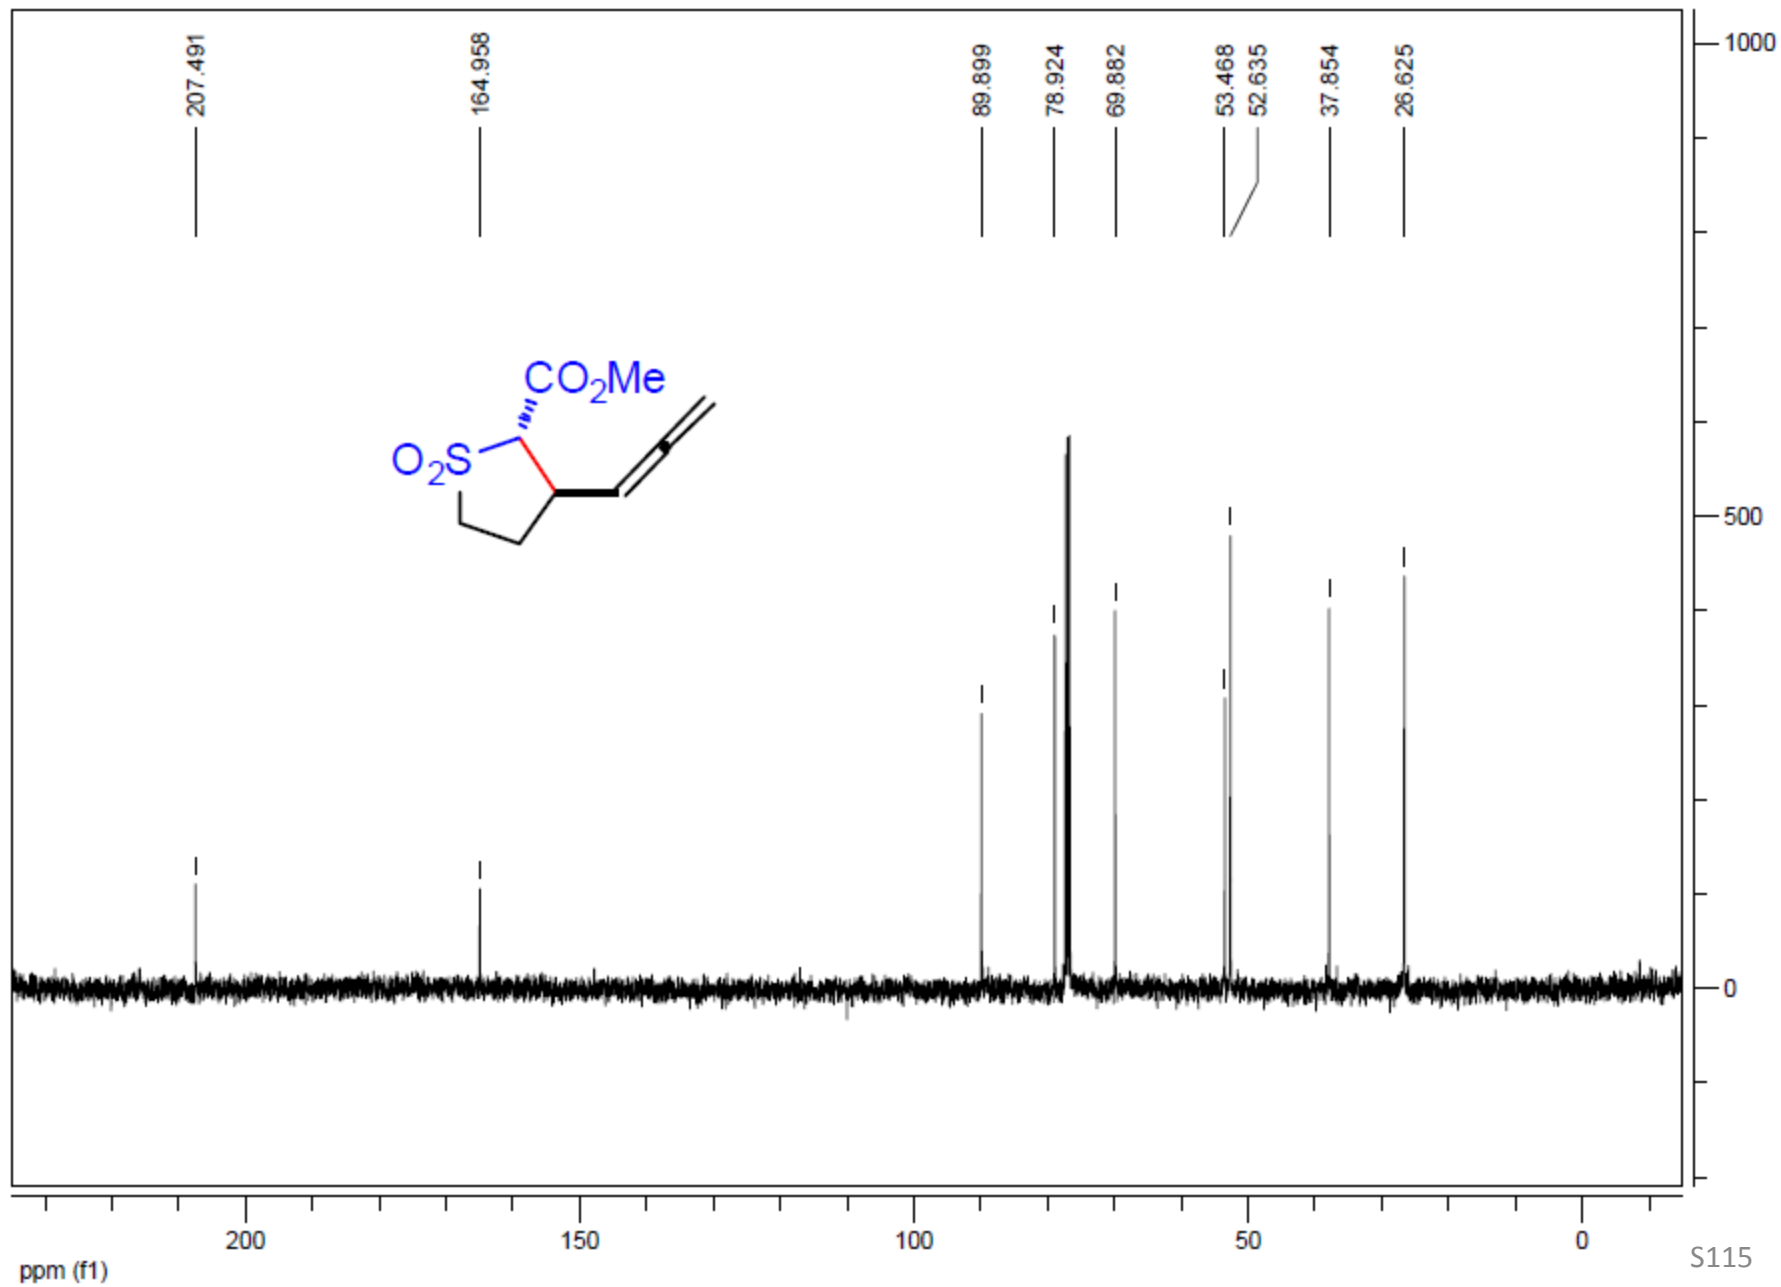



# methyl 3-(propa-1,2-dien-1-yl)tetrahydrothiophene-2-carboxylate 1,1-dioxide (2q)

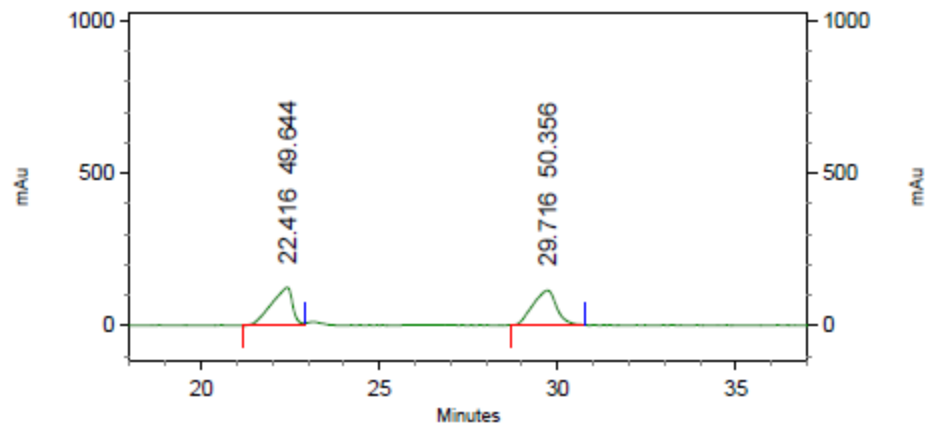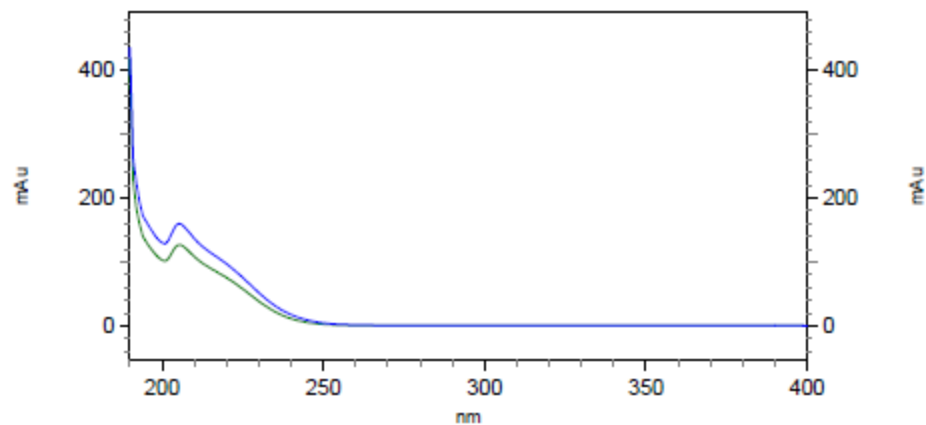

5: 220 nm, 4 nm

## Results

| Name | Retention Time | Area Percent | Pk # |
|------|----------------|--------------|------|
|      | 22.416         | 49.644       | 1    |
|      | 29.716         | 50.356       | 2    |

|        |  |         |  |
|--------|--|---------|--|
| Totals |  | 100.000 |  |
|--------|--|---------|--|

# methyl 3-(propa-1,2-dien-1-yl)tetrahydrothiophene-2-carboxylate 1,1-dioxide (2q)

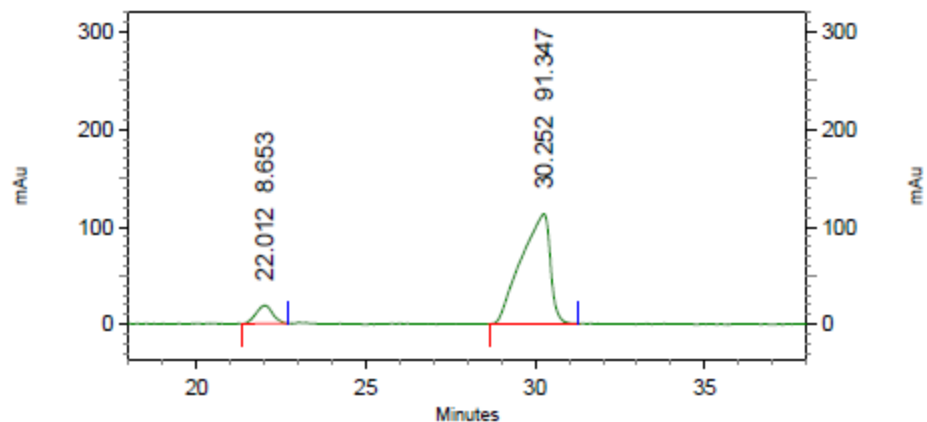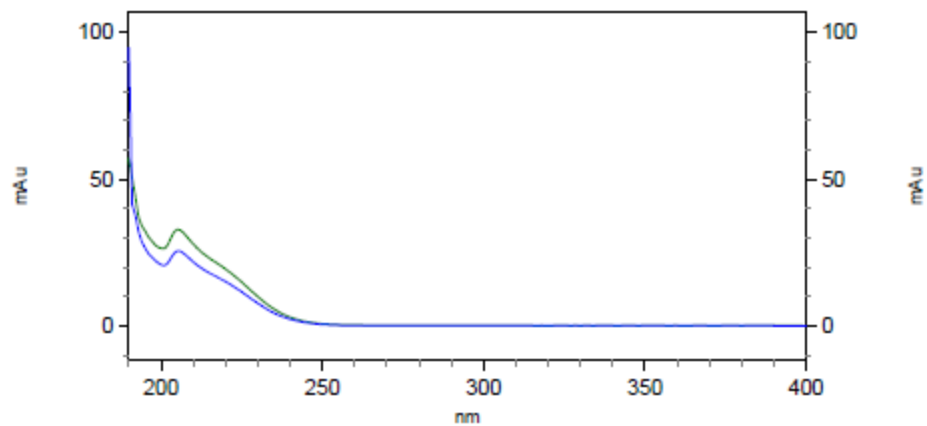

5: 220 nm, 4 nm

Results

| Name | Retention Time | Area Percent | Pk # |
|------|----------------|--------------|------|
|      | 22.012         | 8.653        | 1    |
|      | 30.252         | 91.347       | 2    |

|        |  |         |  |
|--------|--|---------|--|
| Totals |  | 100.000 |  |
|--------|--|---------|--|

methyl (E)-3-(prop-1-en-1-yl)tetrahydrothiophene-2-carboxylate 1,1-dioxide (**2r**)

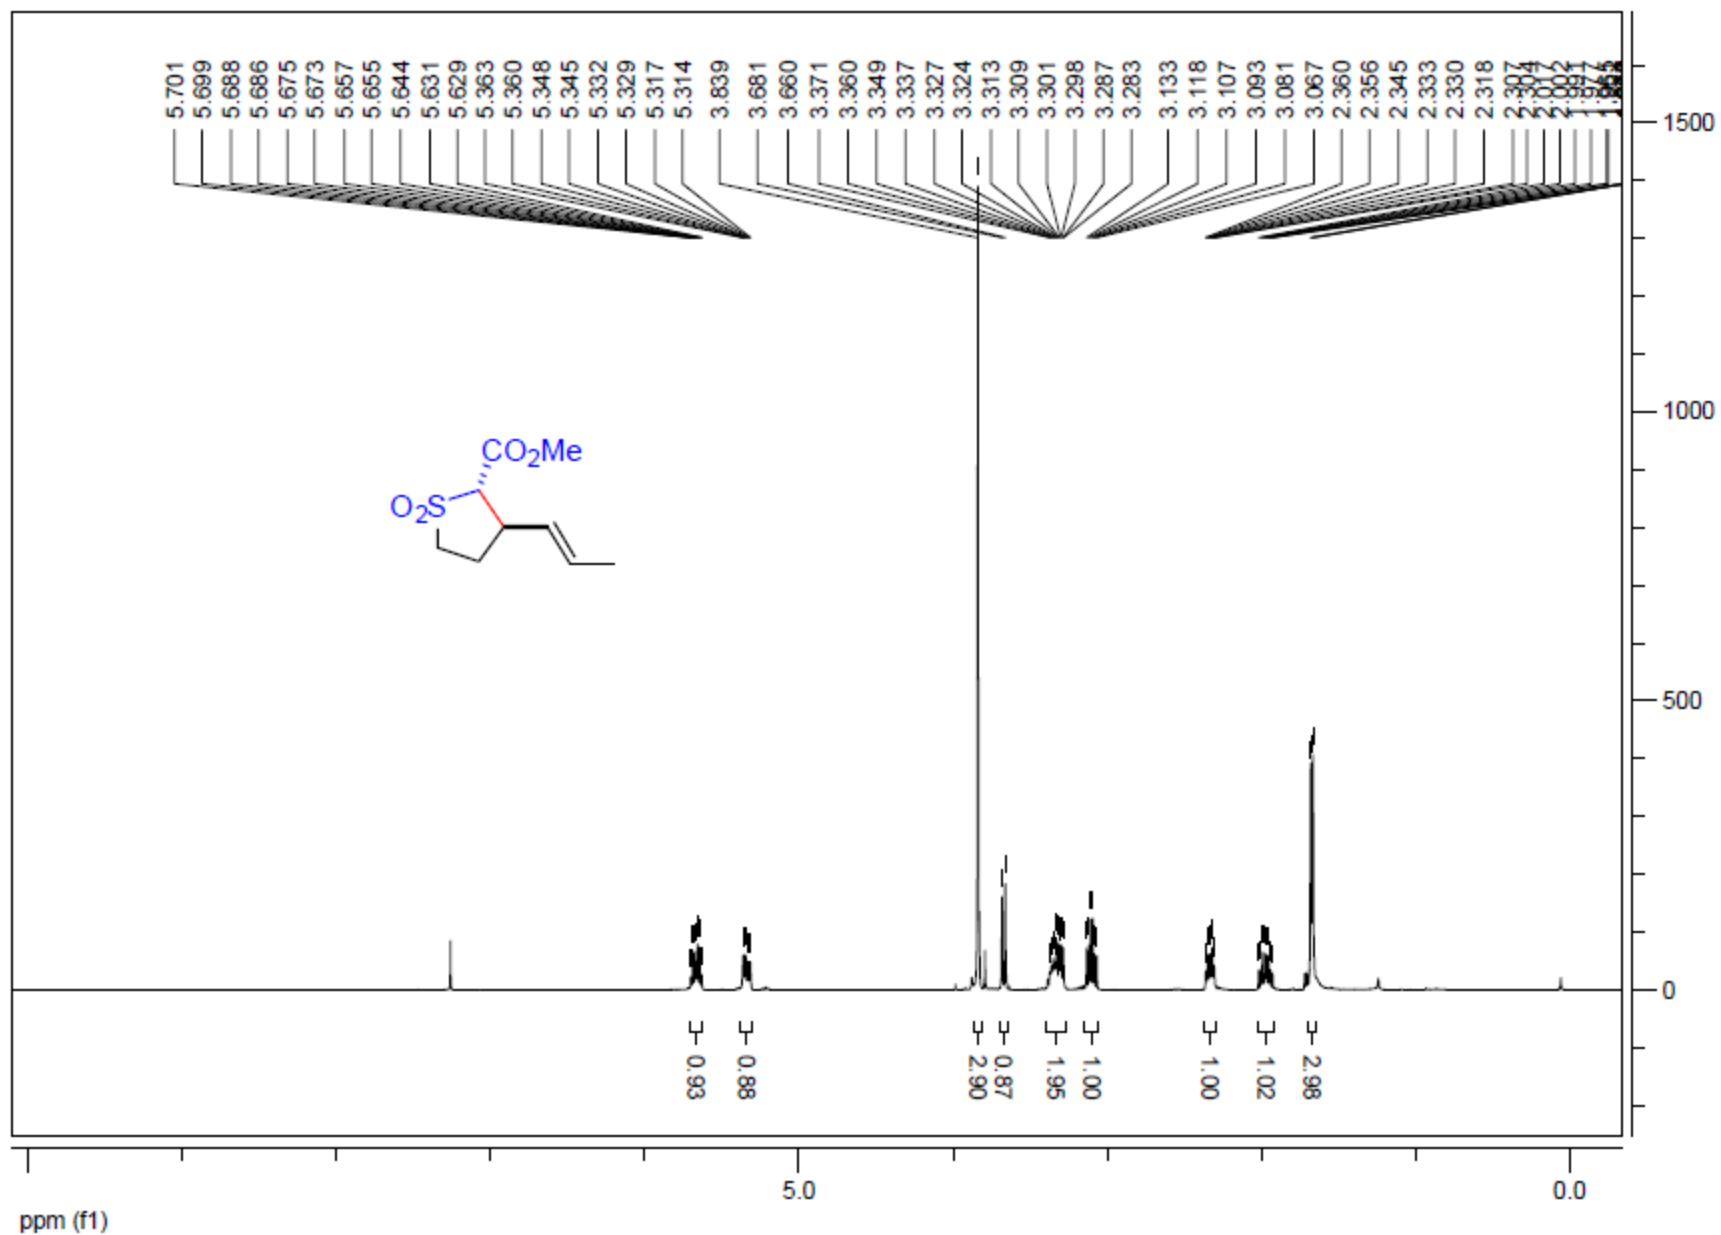

methyl (E)-3-(prop-1-en-1-yl)tetrahydrothiophene-2-carboxylate 1,1-dioxide (**2r**)

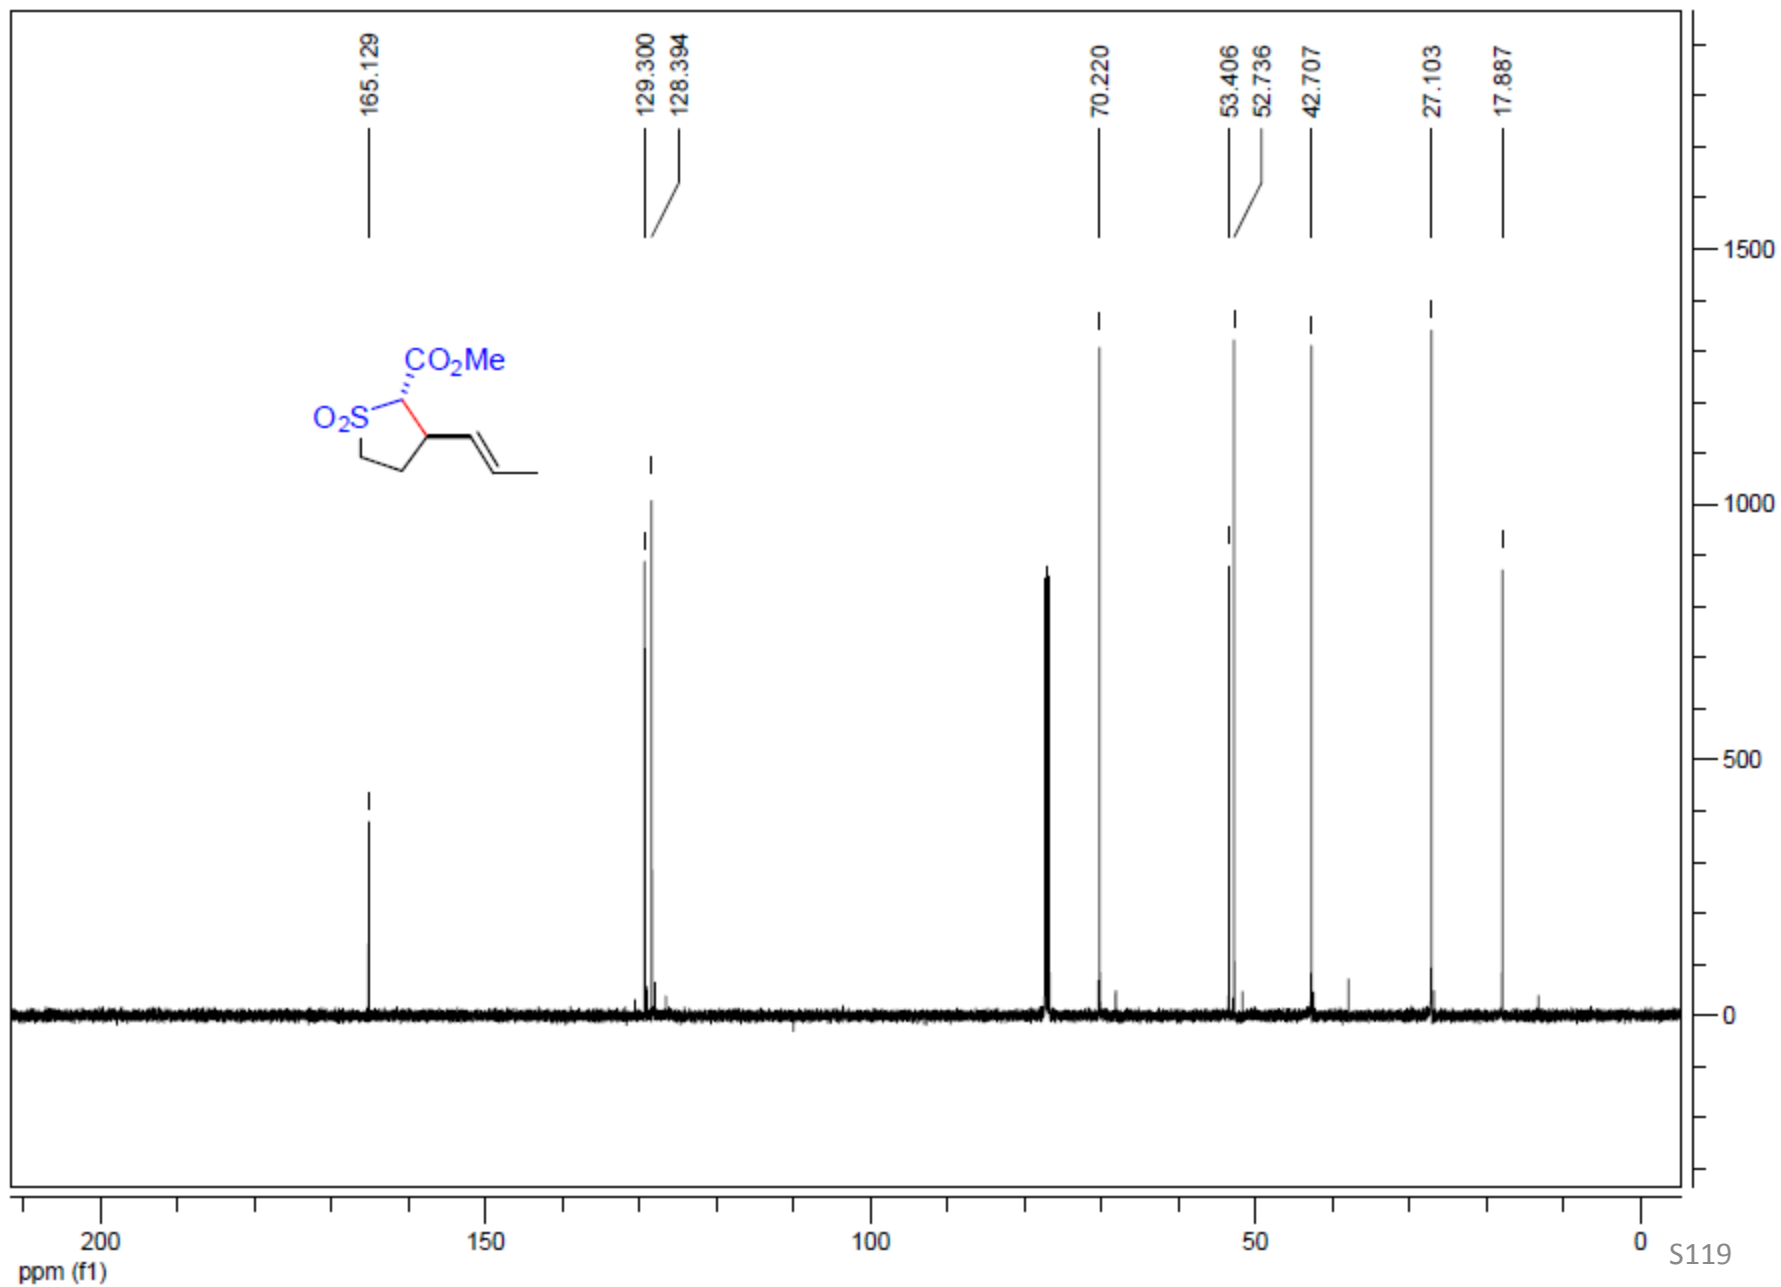

# methyl (Z)-3-(prop-1-en-1-yl)tetrahydrothiophene-2-carboxylate 1,1-dioxide (2s)

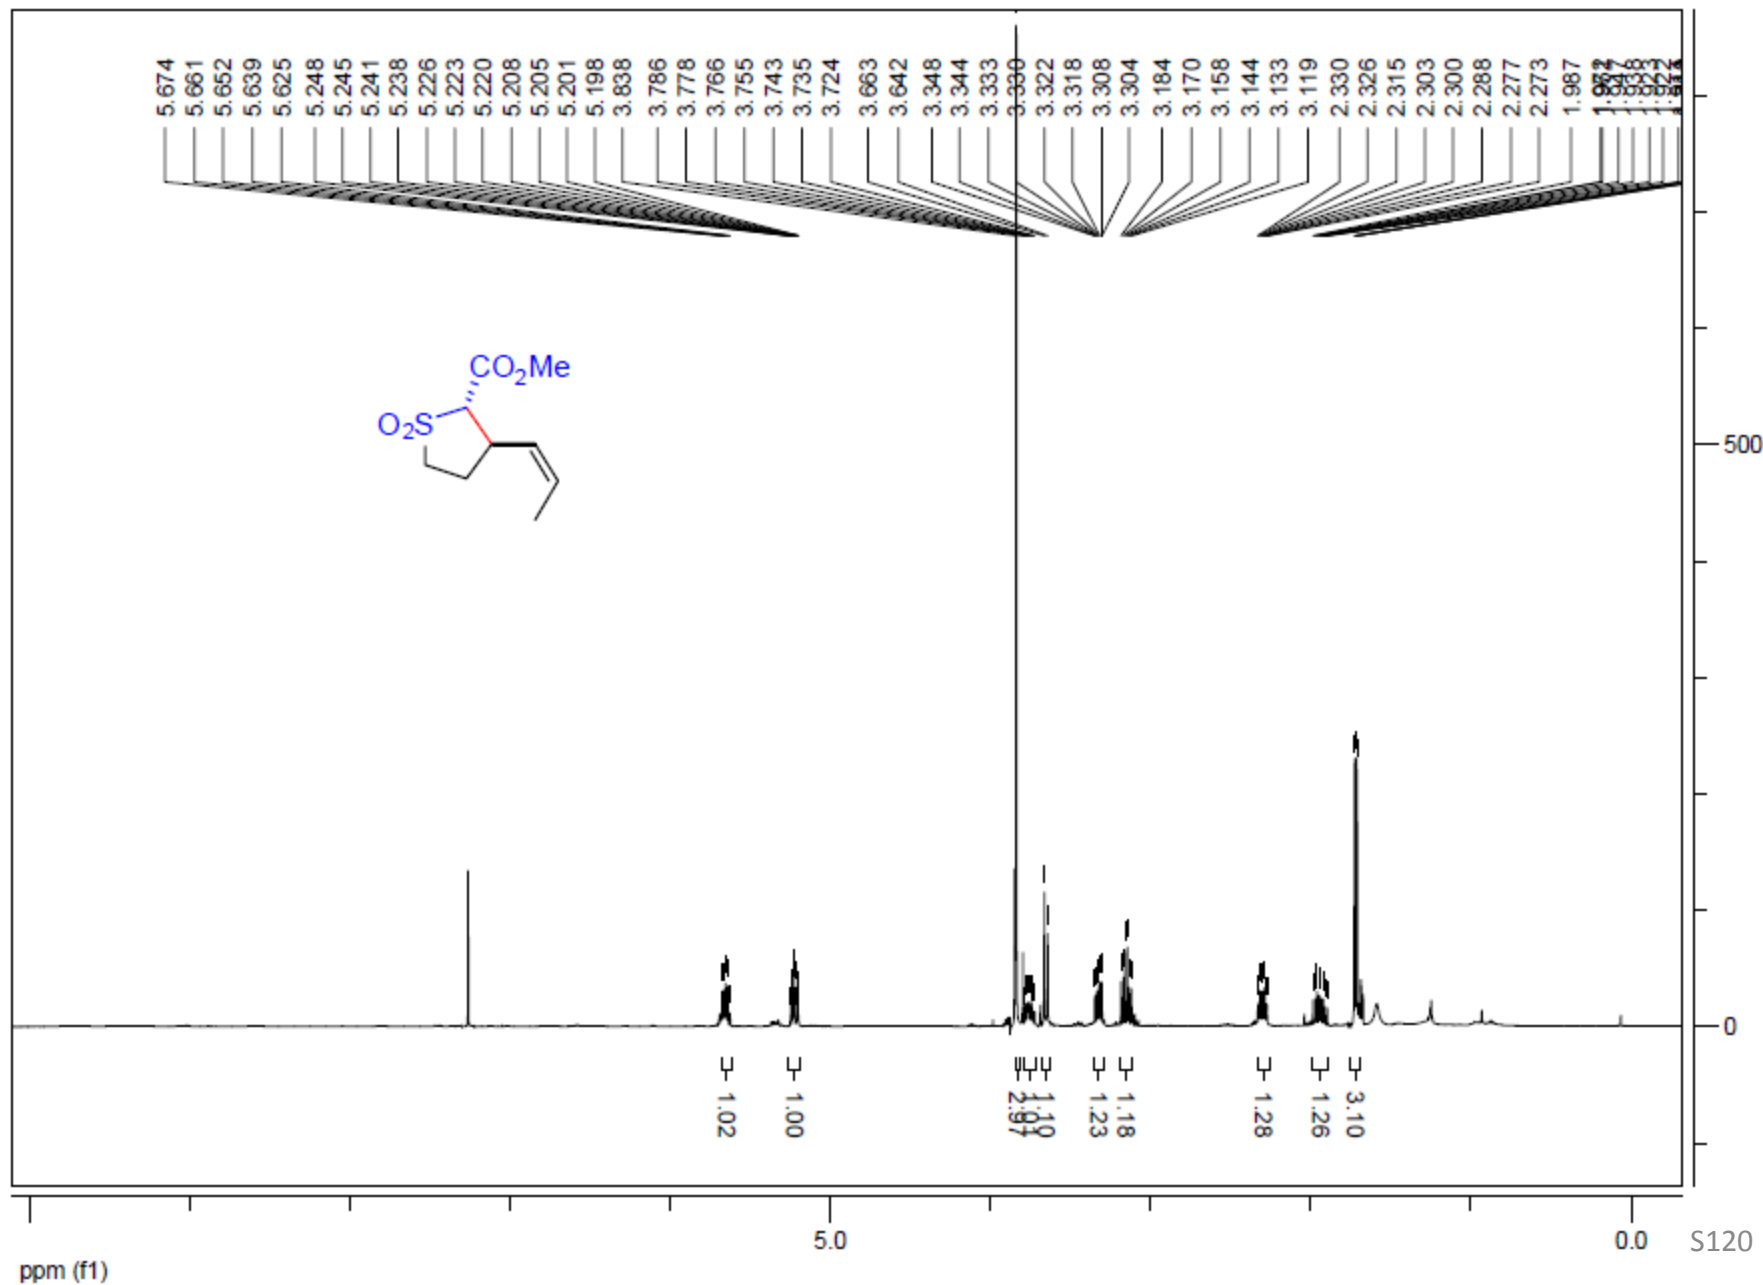

methyl (Z)-3-(prop-1-en-1-yl)tetrahydrothiophene-2-carboxylate 1,1-dioxide (**2s**)

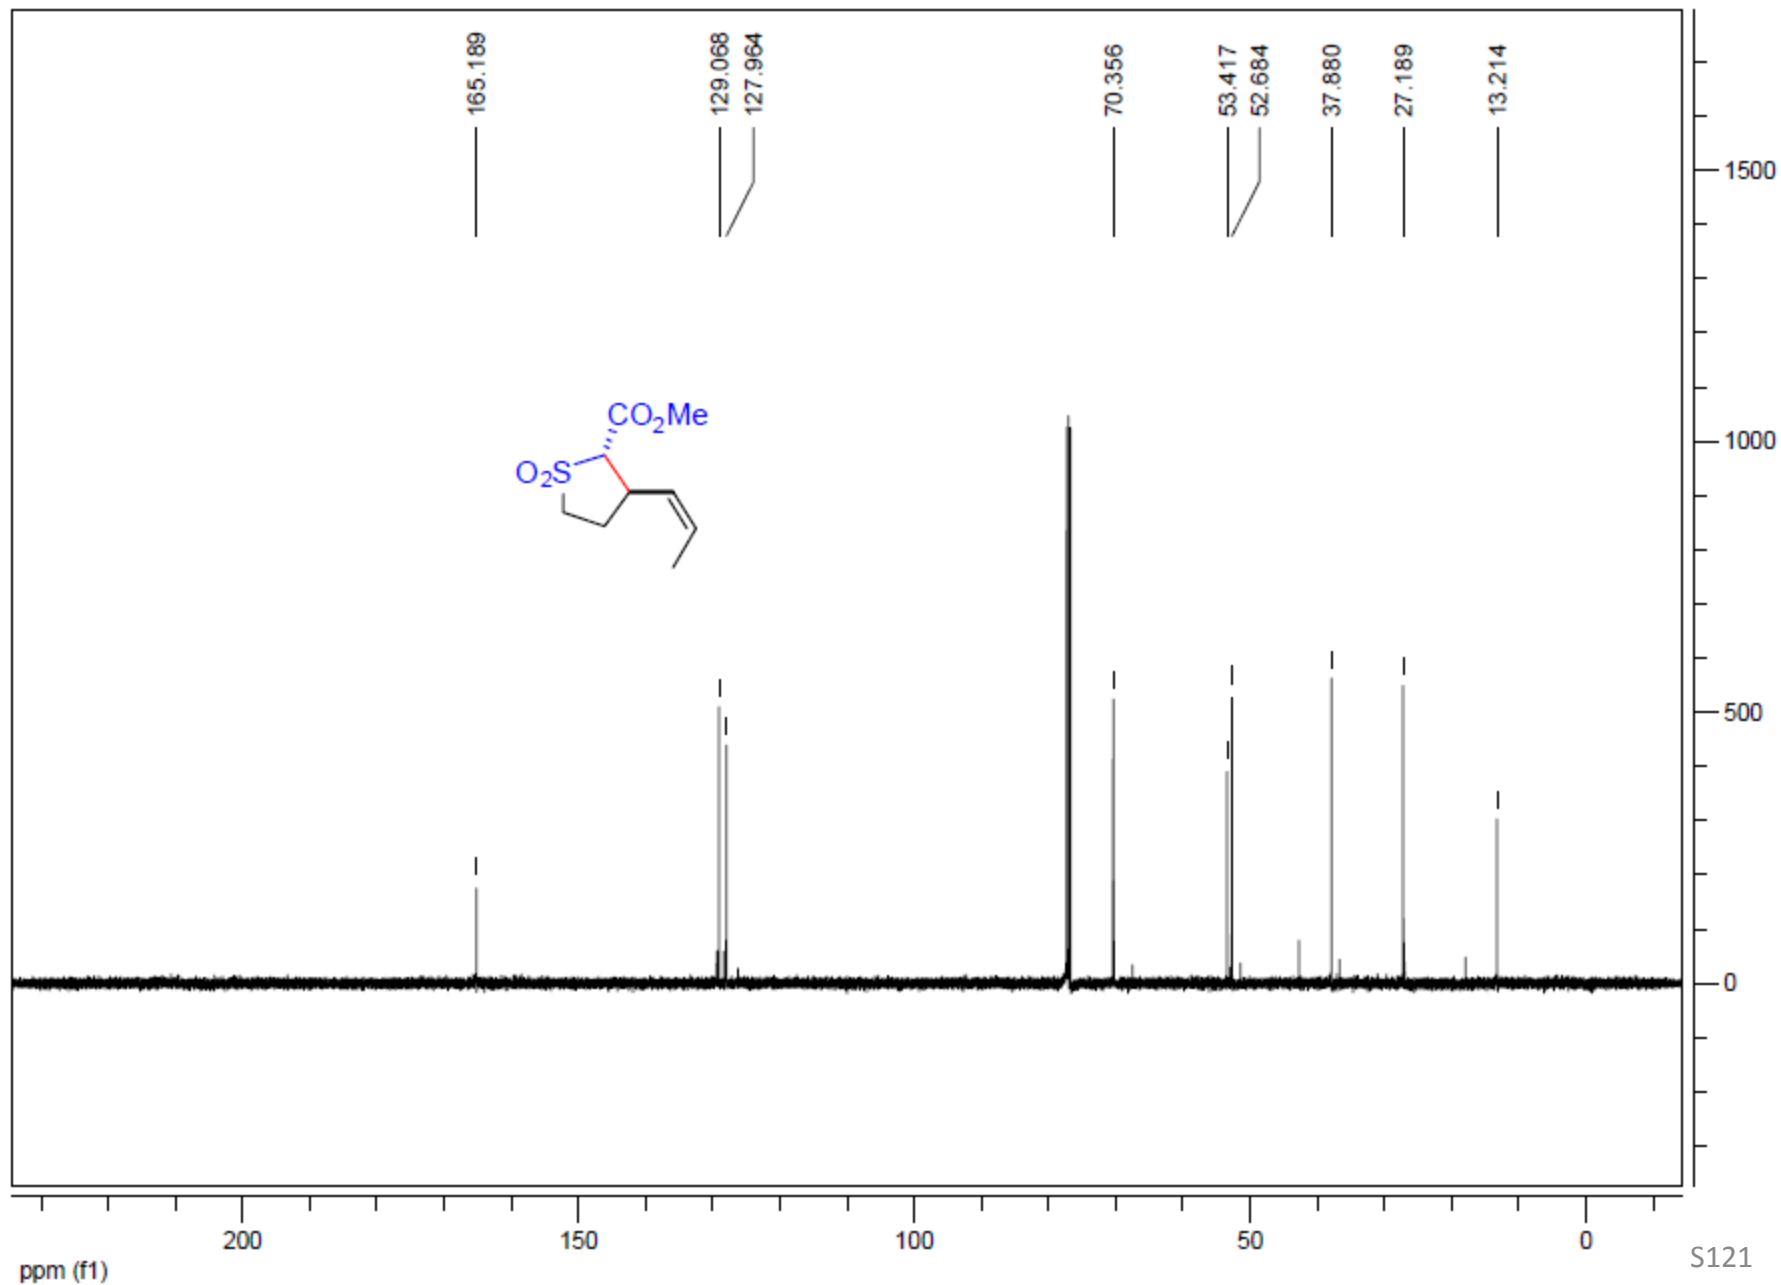

methyl 2-fluoro-3-(4-methoxyphenyl)tetrahydrothiophene-2-carboxylate 1,1-dioxide  
**(3ia)**

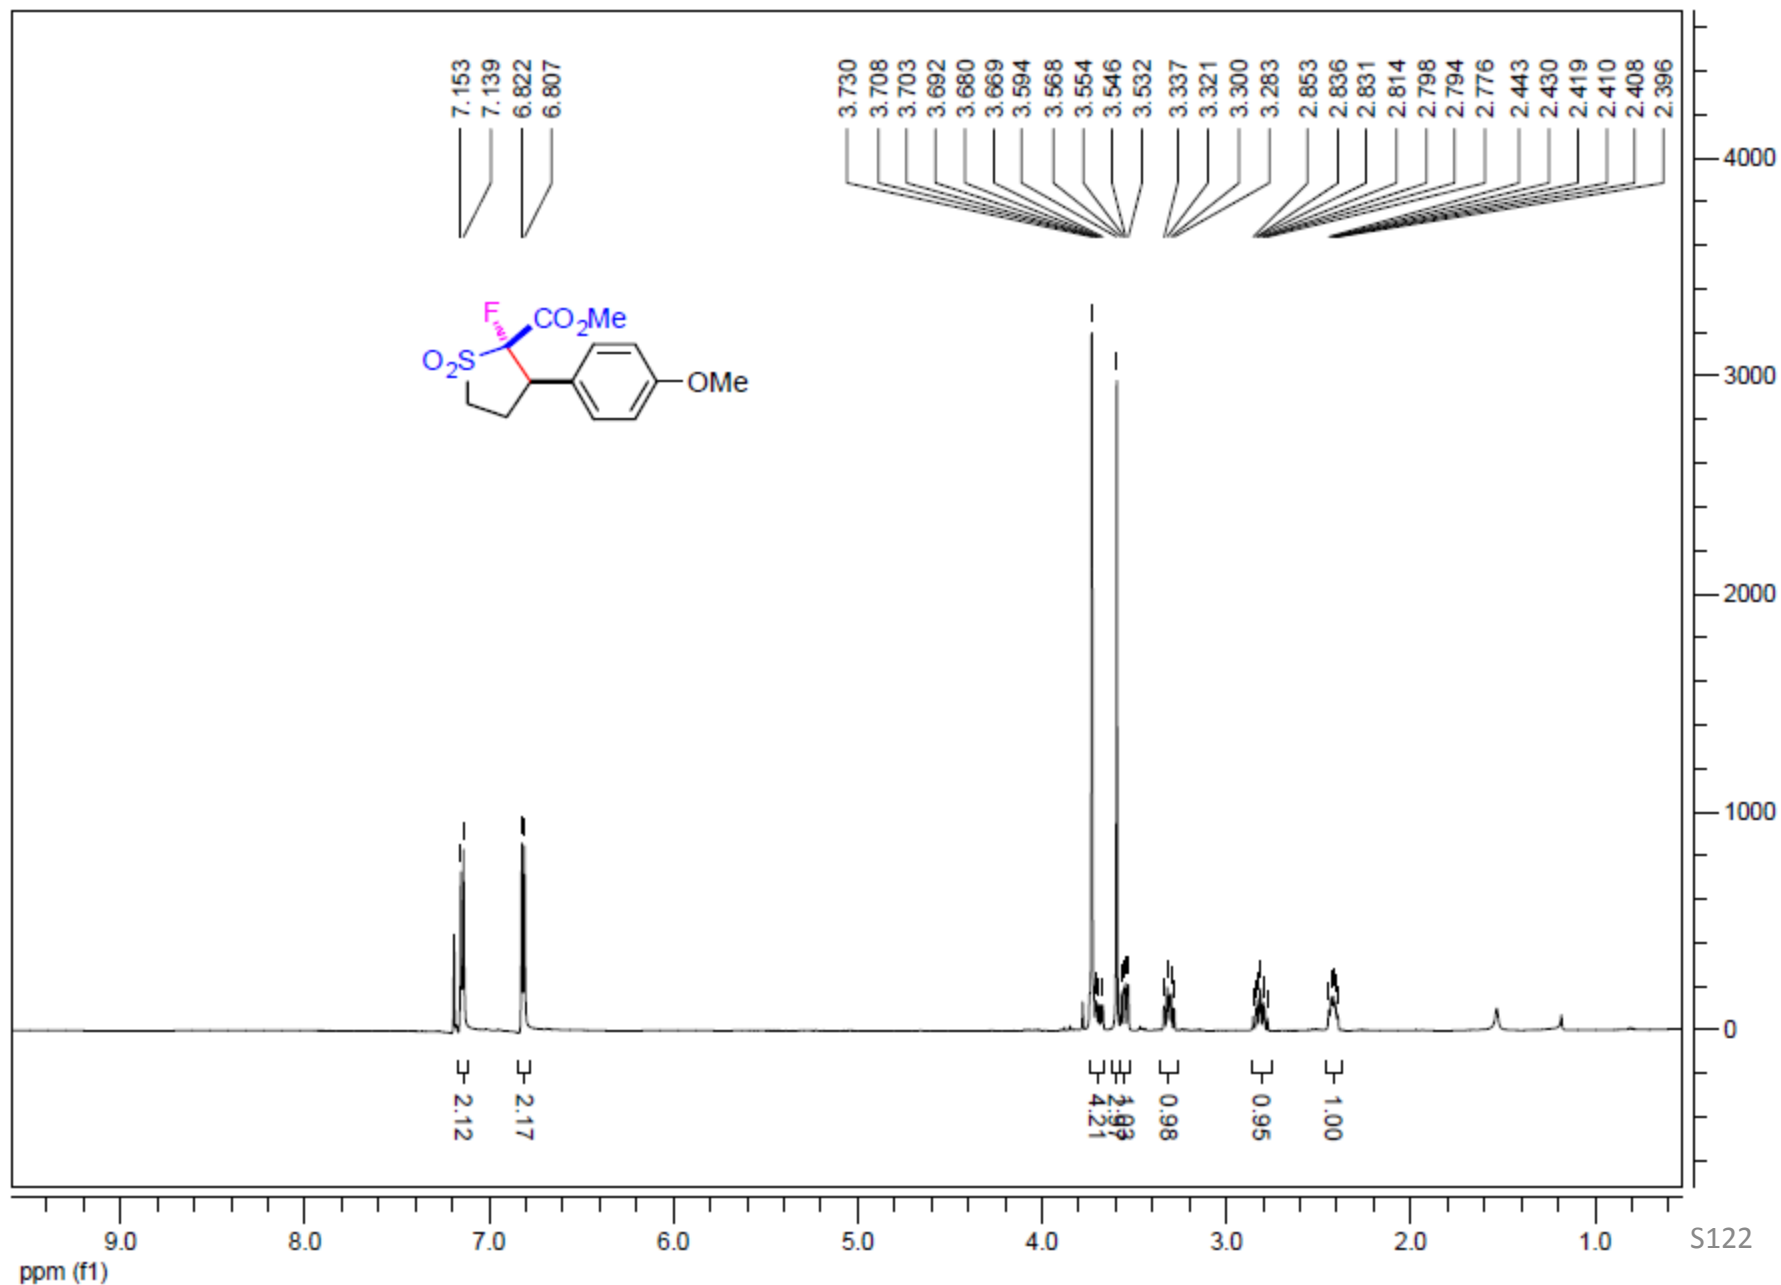

methyl 2-fluoro-3-(4-methoxyphenyl)tetrahydrothiophene-2-carboxylate 1,1-dioxide  
**(3ia)**

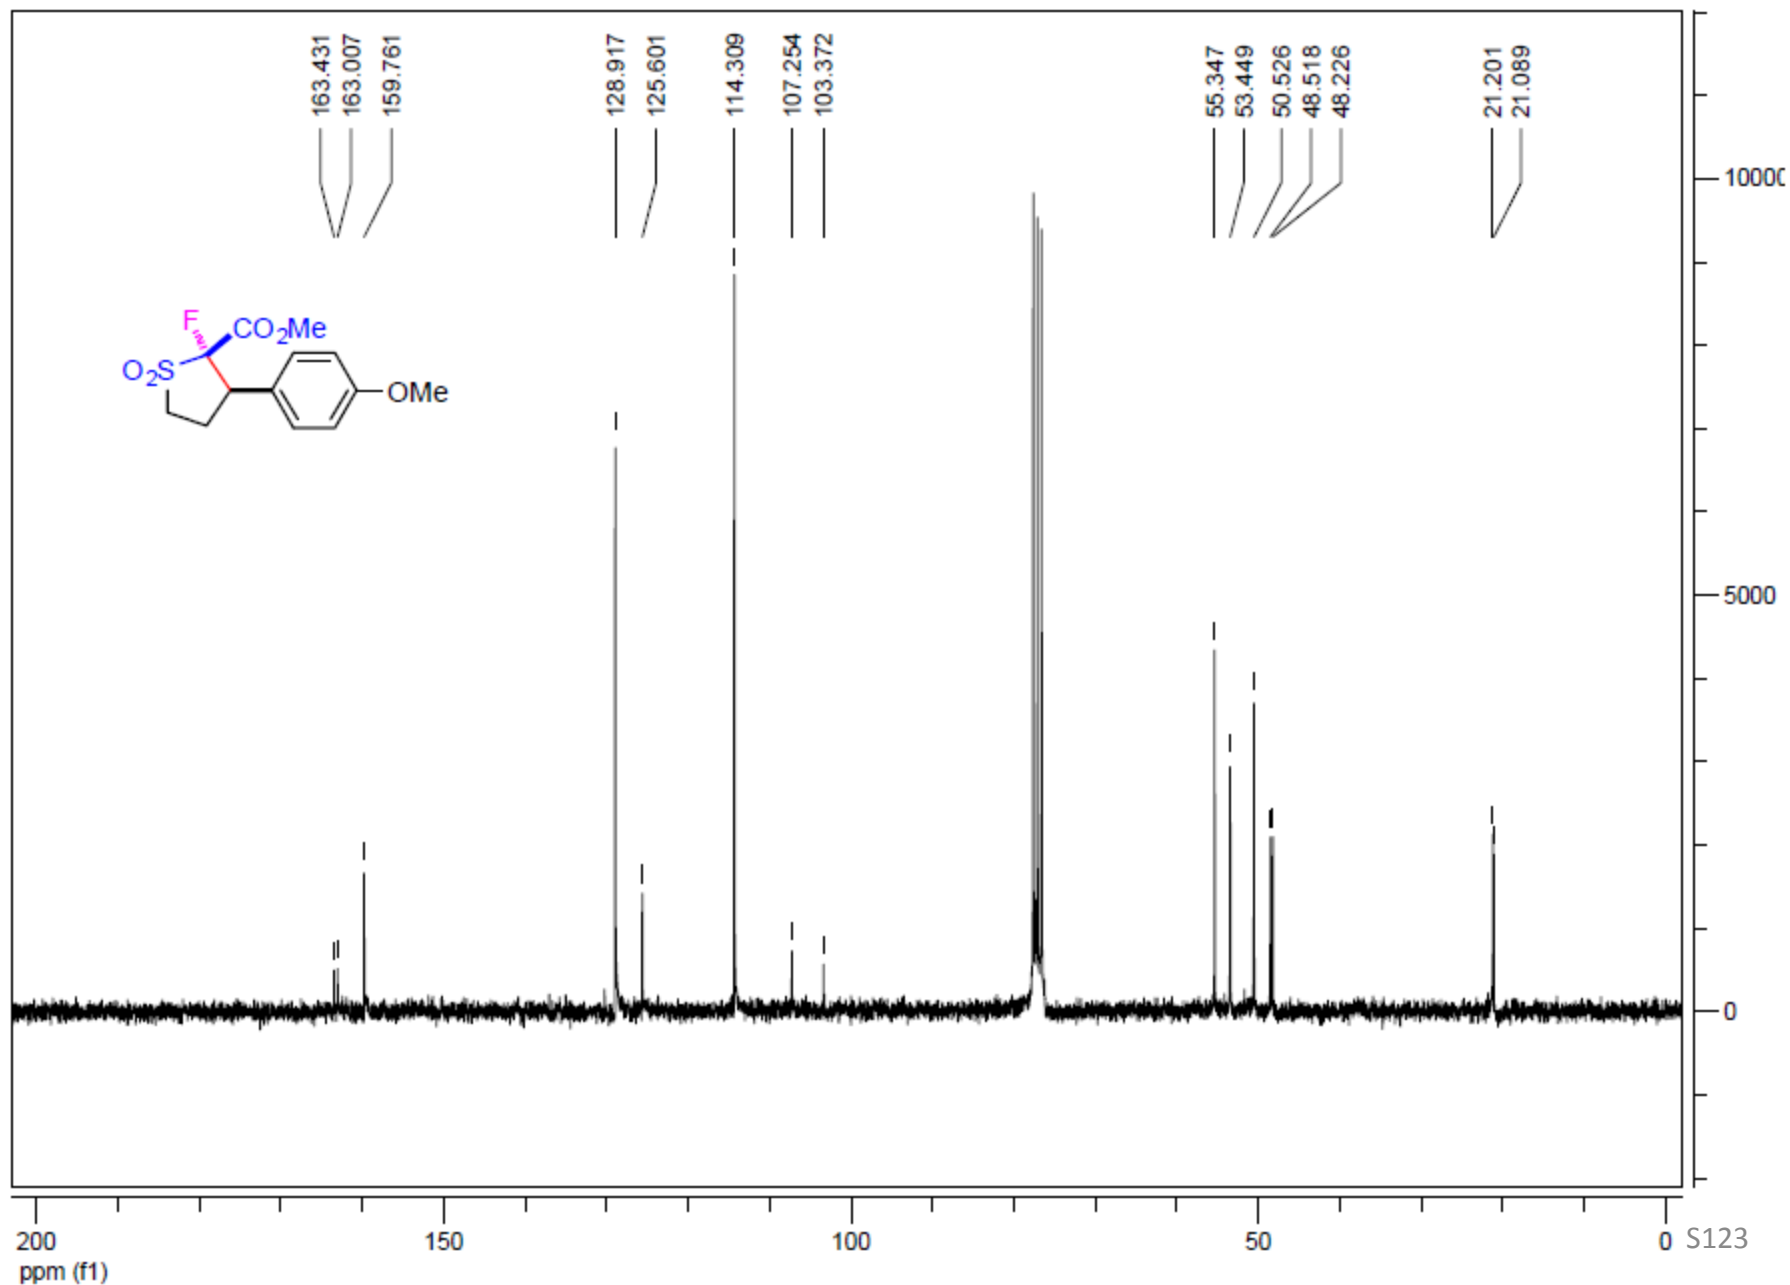



methyl 2-fluoro-3-(4-methoxyphenyl)tetrahydrothiophene-2-carboxylate 1,1-dioxide  
**(3ia)**

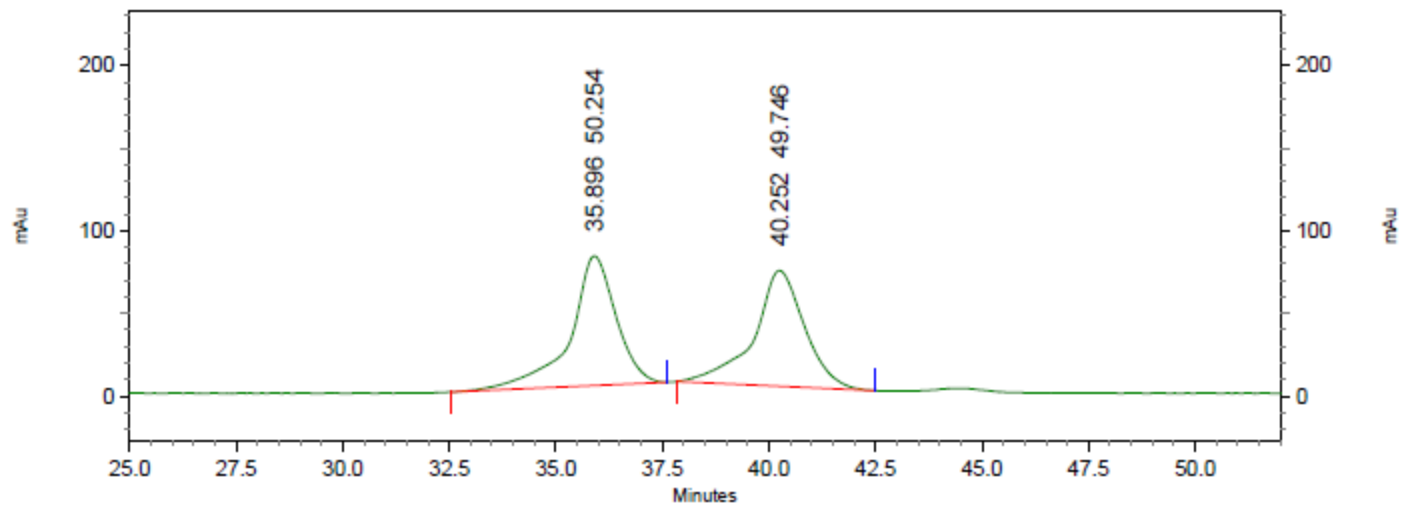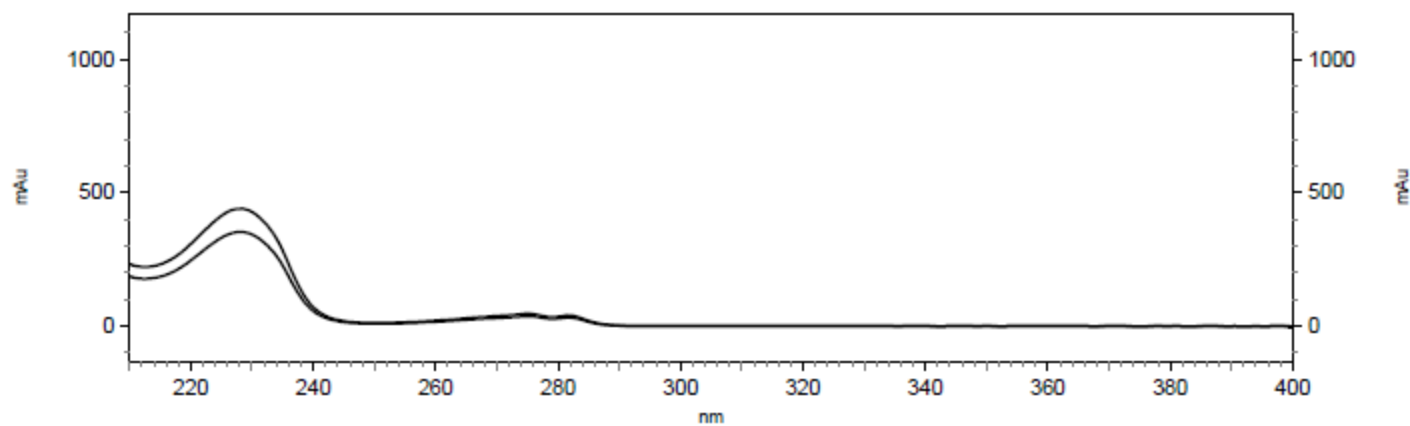

11: 224 nm, 4 nm Results

| Pk #   | Retention Time | Area Percent |
|--------|----------------|--------------|
| 1      | 35.896         | 50.254       |
| 2      | 40.252         | 49.746       |
| Totals |                | 100.000      |

methyl 2-fluoro-3-(4-methoxyphenyl)tetrahydrothiophene-2-carboxylate 1,1-dioxide  
**(3ia)**

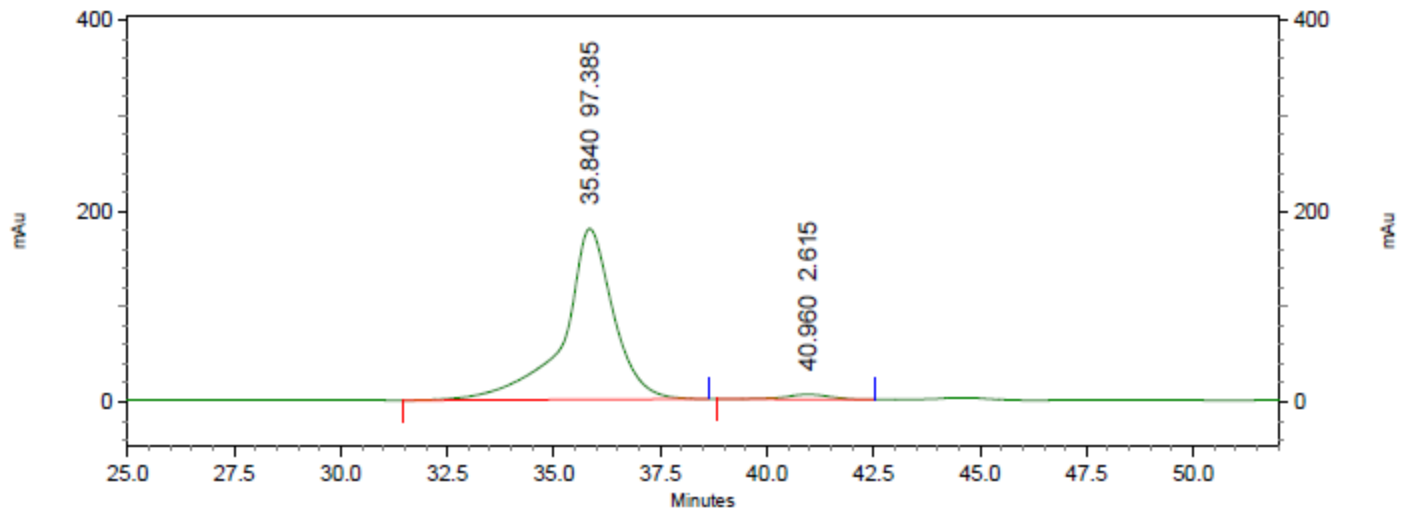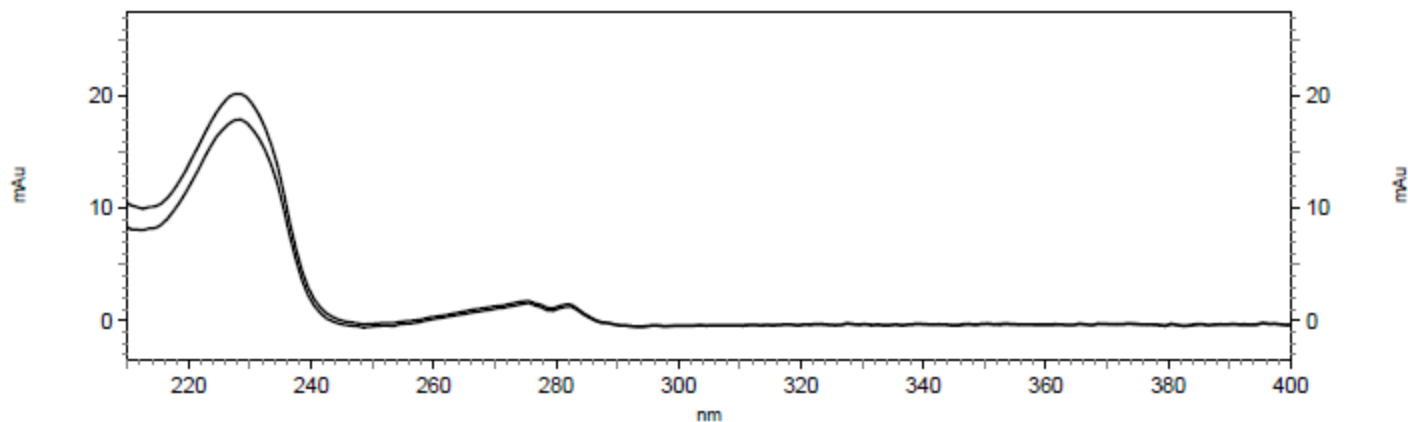

8: 232 nm, 4 nm Results

| Pk # | Retention Time | Area Percent |
|------|----------------|--------------|
| 1    | 35.840         | 97.385       |
| 2    | 40.960         | 2.615        |

|        |         |
|--------|---------|
| Totals | 100.000 |
|--------|---------|

(2R,3R)-methyl 3-(3,5-dichlorophenyl)-2-fluorotetrahydrothiophene-2-carboxylate 1,1-dioxide (**3ea**)

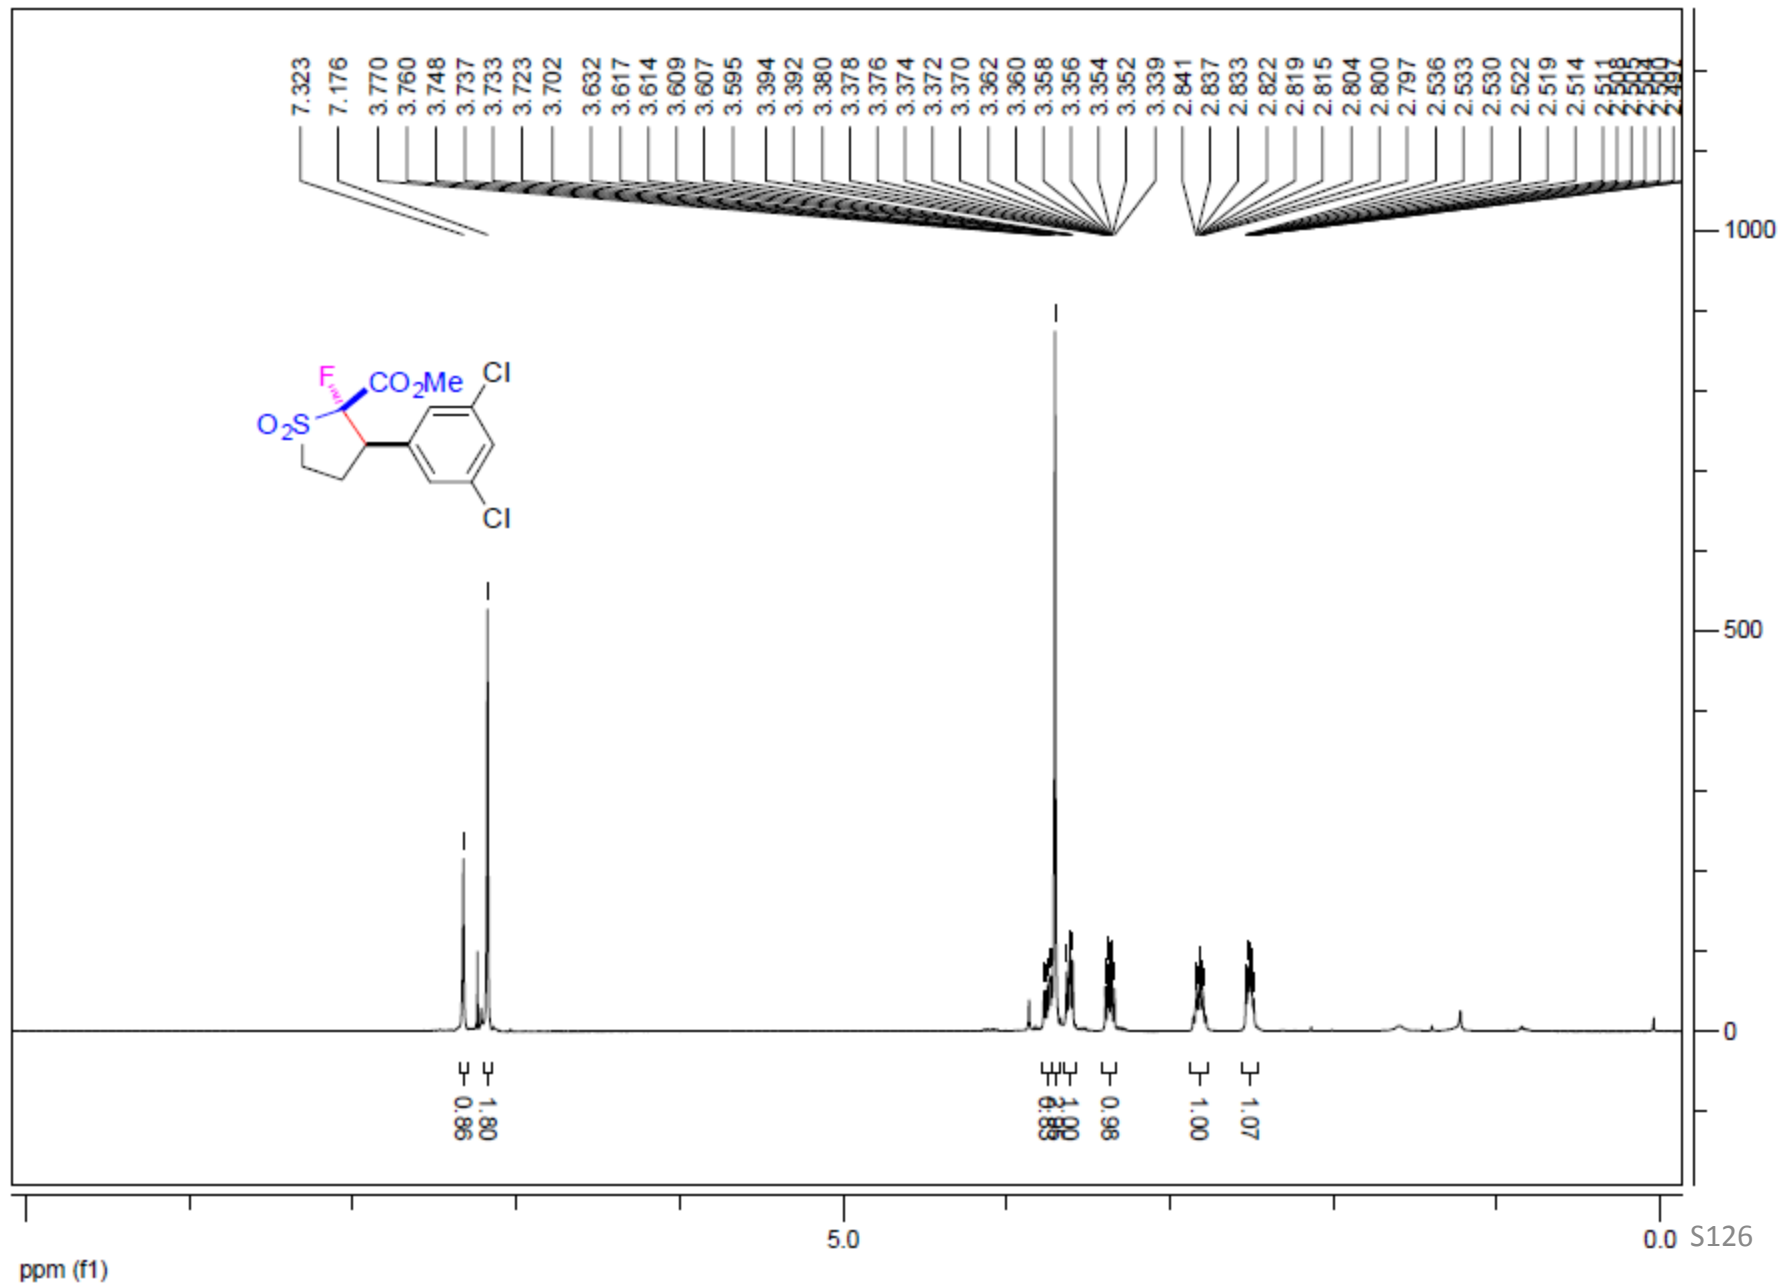

(2R,3R)-methyl 3-(3,5-dichlorophenyl)-2-fluorotetrahydrothiophene-2-carboxylate 1,1-dioxide (**3ea**)

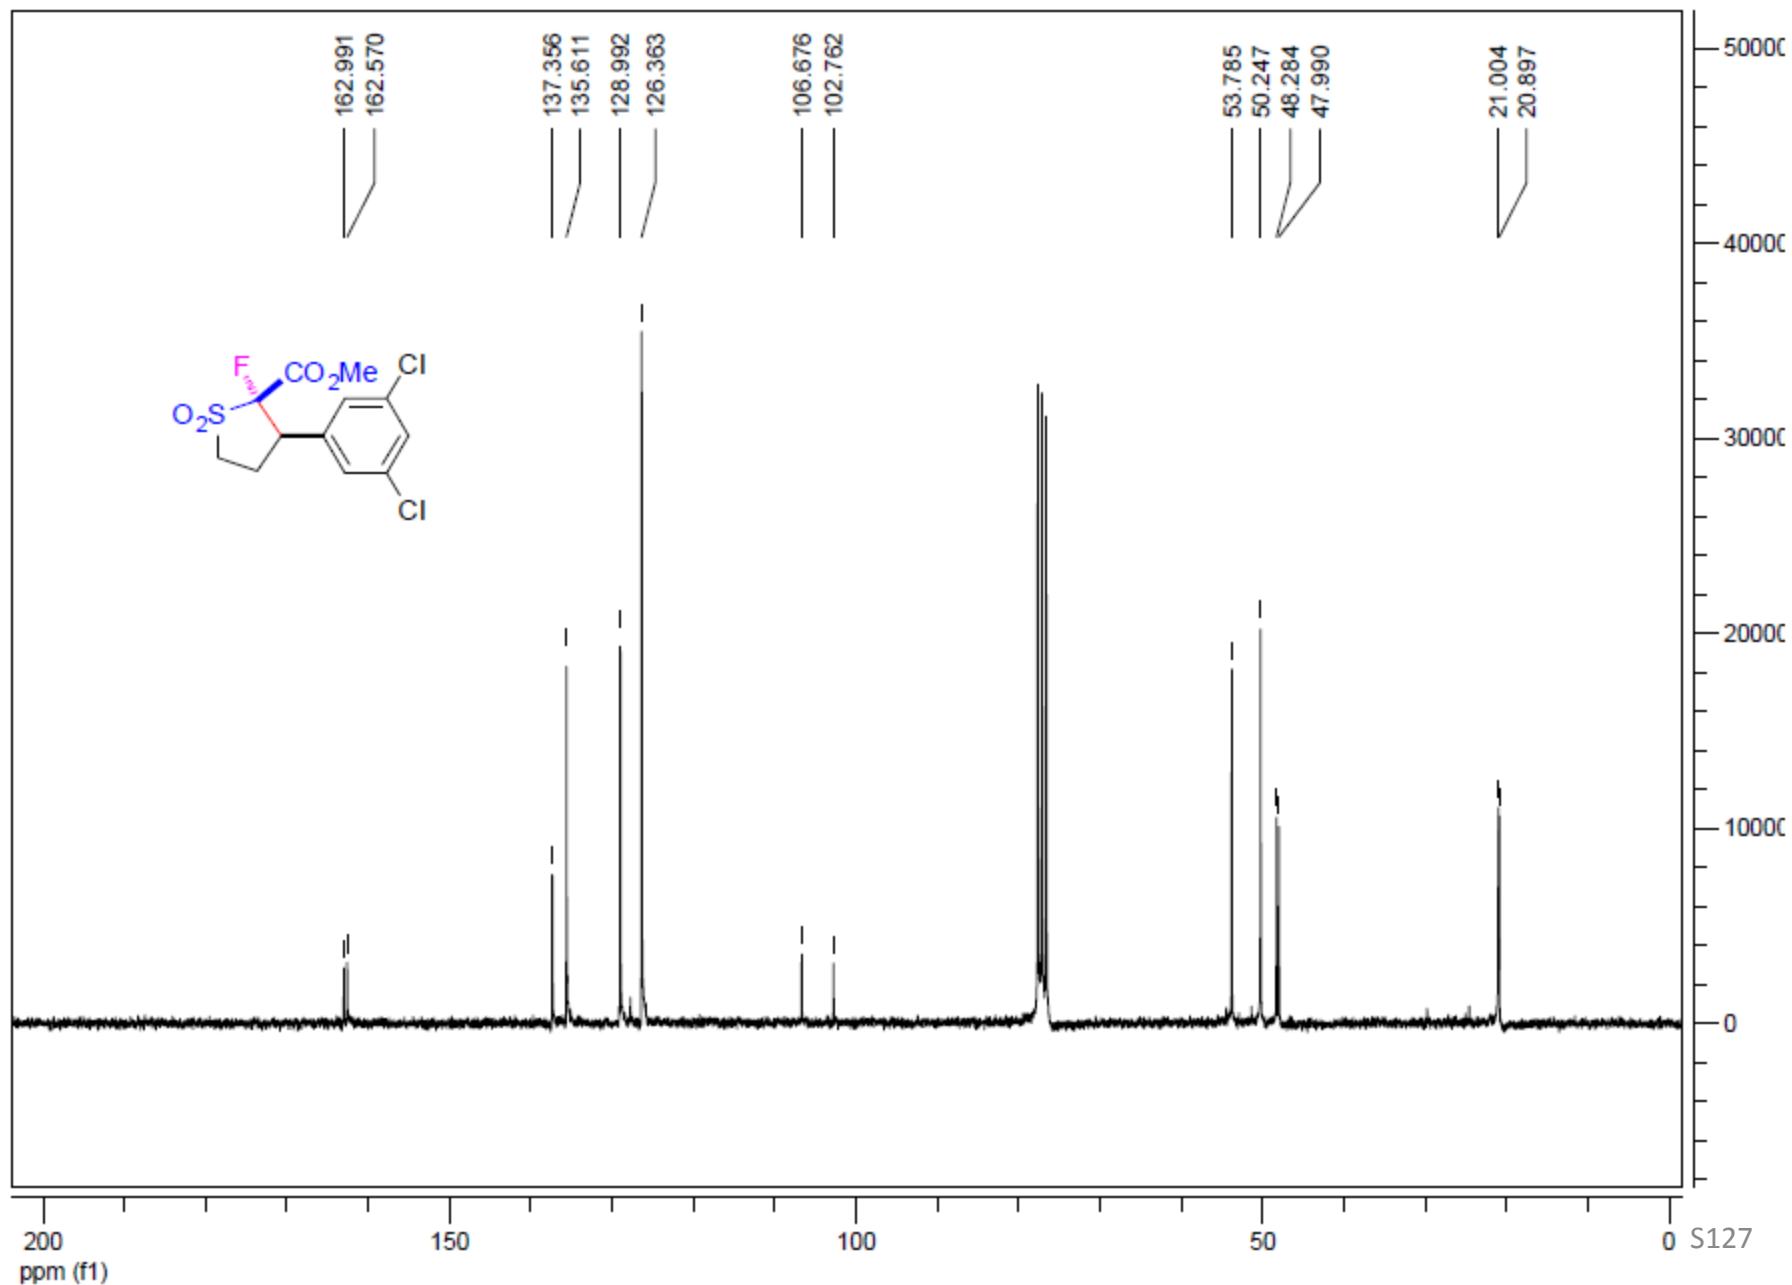

# (2R,3R)-methyl 3-(3,5-dichlorophenyl)-2-fluorotetrahydrothiophene-2-carboxylate 1,1-dioxide (**3ea**)

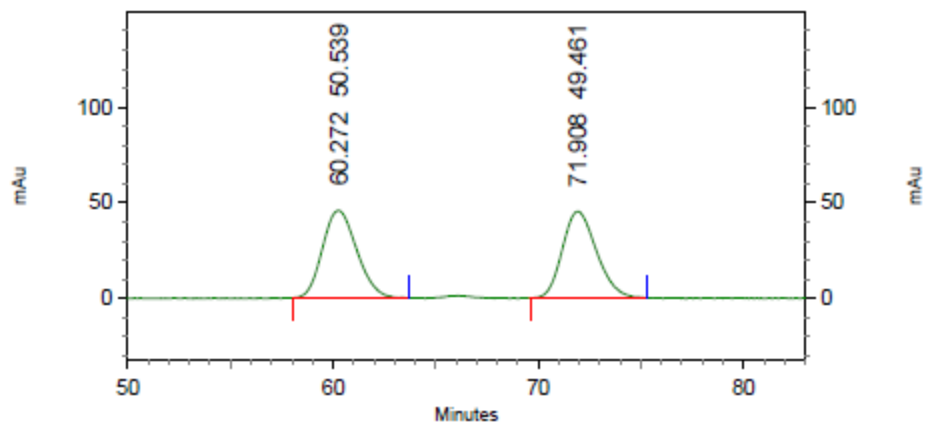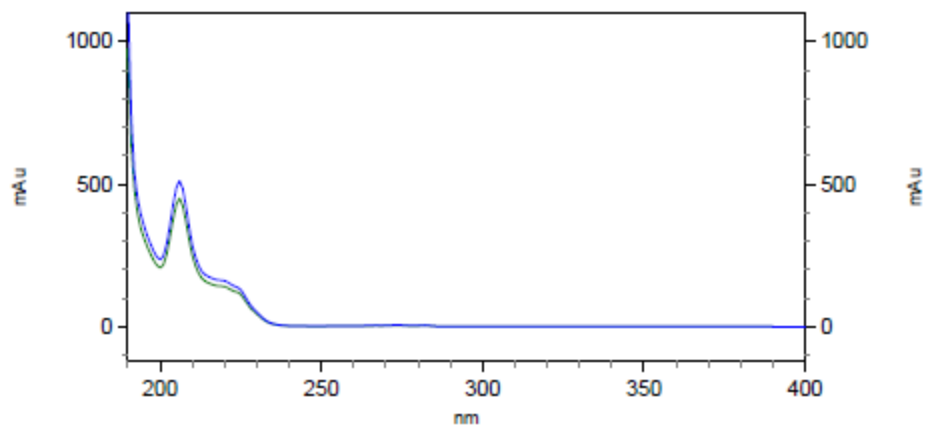

4: 223 nm, 4 nm

Results

| Name | Retention Time | Area Percent | Pk # |
|------|----------------|--------------|------|
|      | 60.272         | 50.539       | 1    |
|      | 71.908         | 49.461       | 2    |

|        |  |         |  |
|--------|--|---------|--|
| Totals |  | 100.000 |  |
|--------|--|---------|--|

# (2R,3R)-methyl 3-(3,5-dichlorophenyl)-2-fluorotetrahydrothiophene-2-carboxylate 1,1-dioxide (3ea)

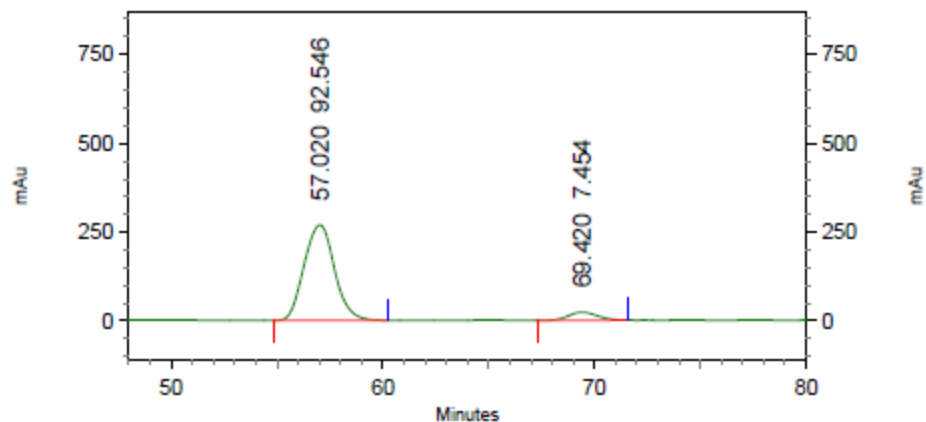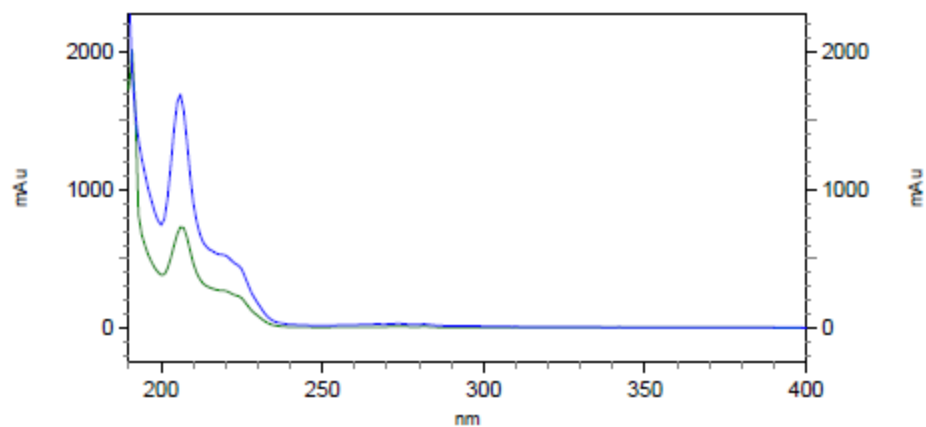

4: 223 nm, 4 nm

Results

| Name | Retention Time | Area Percent | Pk # |
|------|----------------|--------------|------|
|      | 57.020         | 92.546       | 1    |
|      | 69.420         | 7.454        | 2    |

|        |         |  |
|--------|---------|--|
| Totals | 100.000 |  |
|--------|---------|--|

methyl 2-chloro-3-(4-methoxyphenyl)tetrahydrothiophene-2-carboxylate 1,1-dioxide  
**(3ib)**

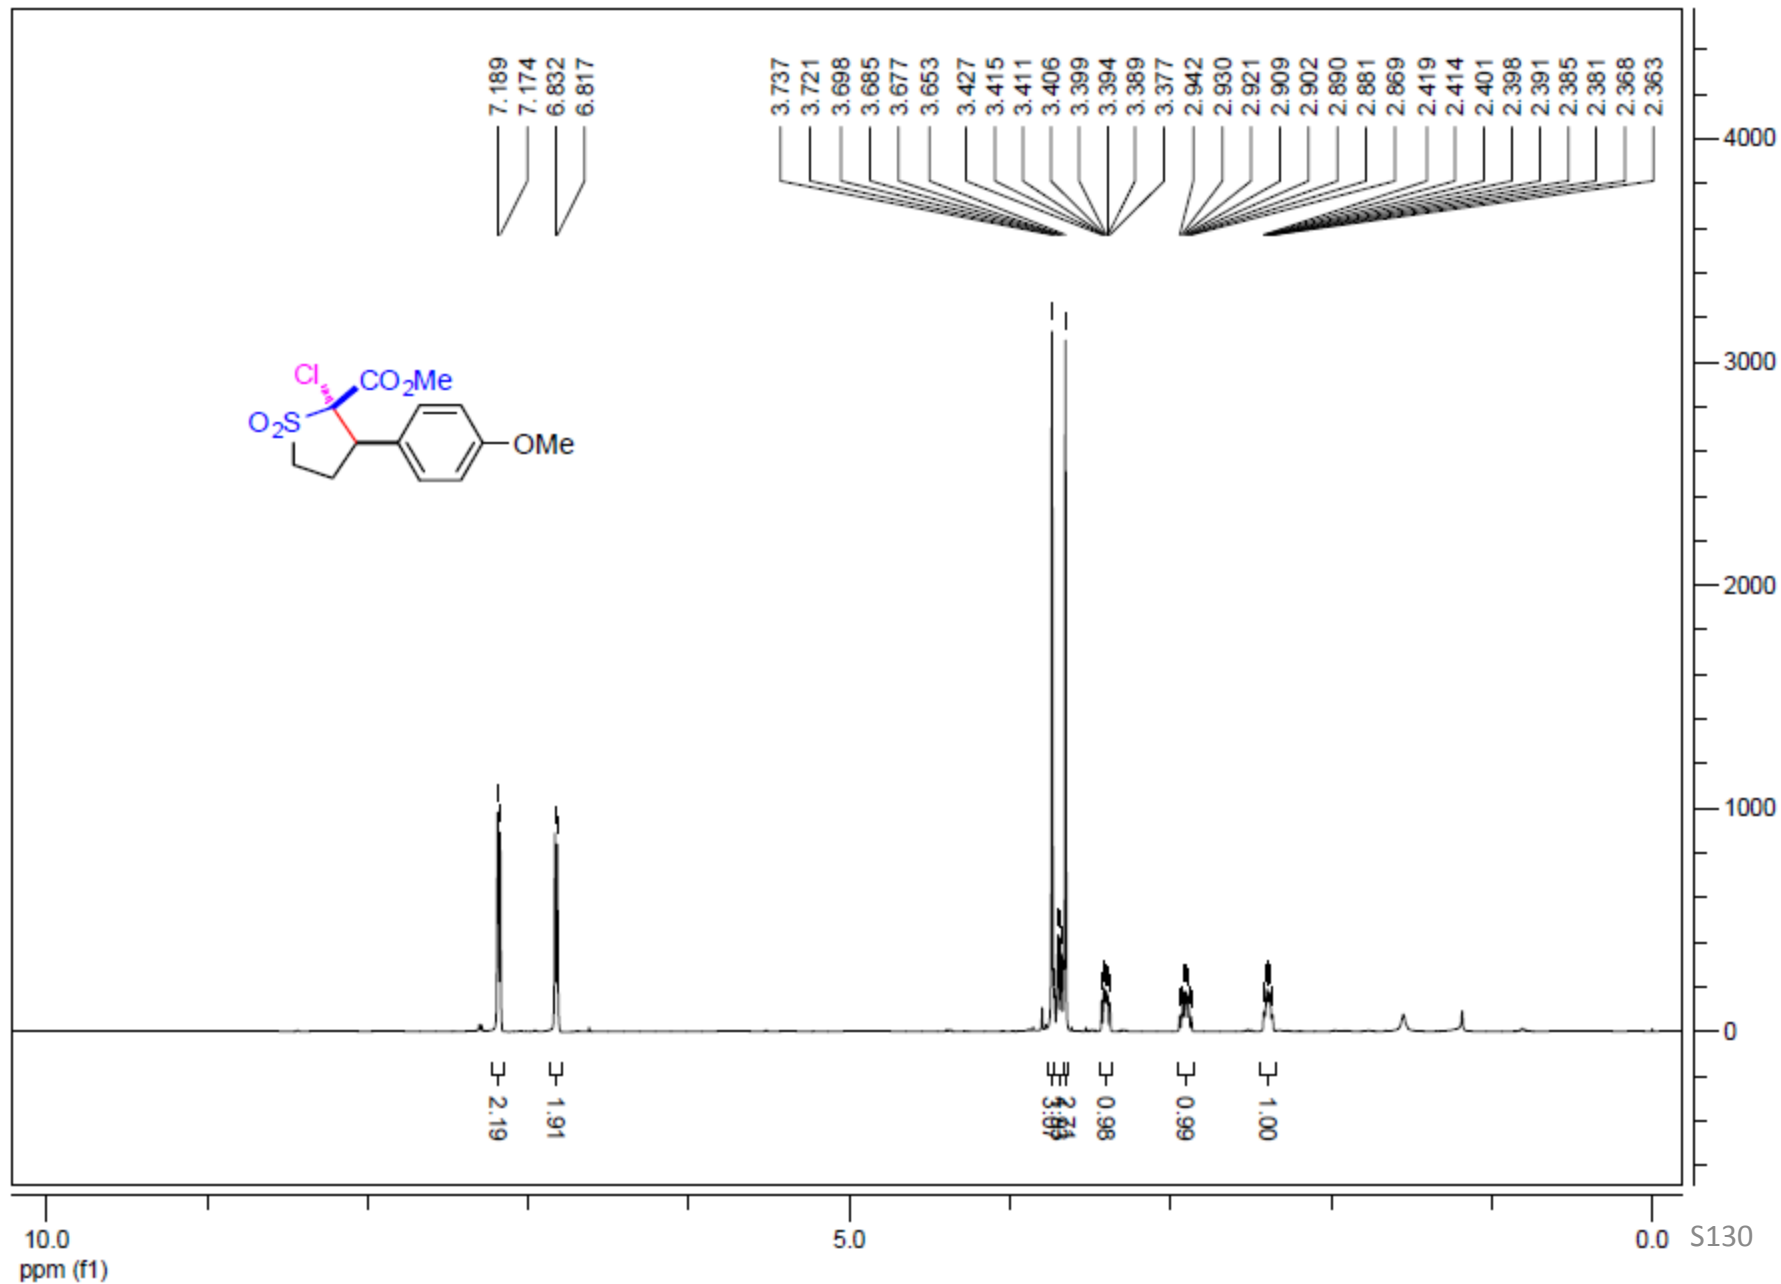

methyl 2-chloro-3-(4-methoxyphenyl)tetrahydrothiophene-2-carboxylate 1,1-dioxide  
**(3ib)**

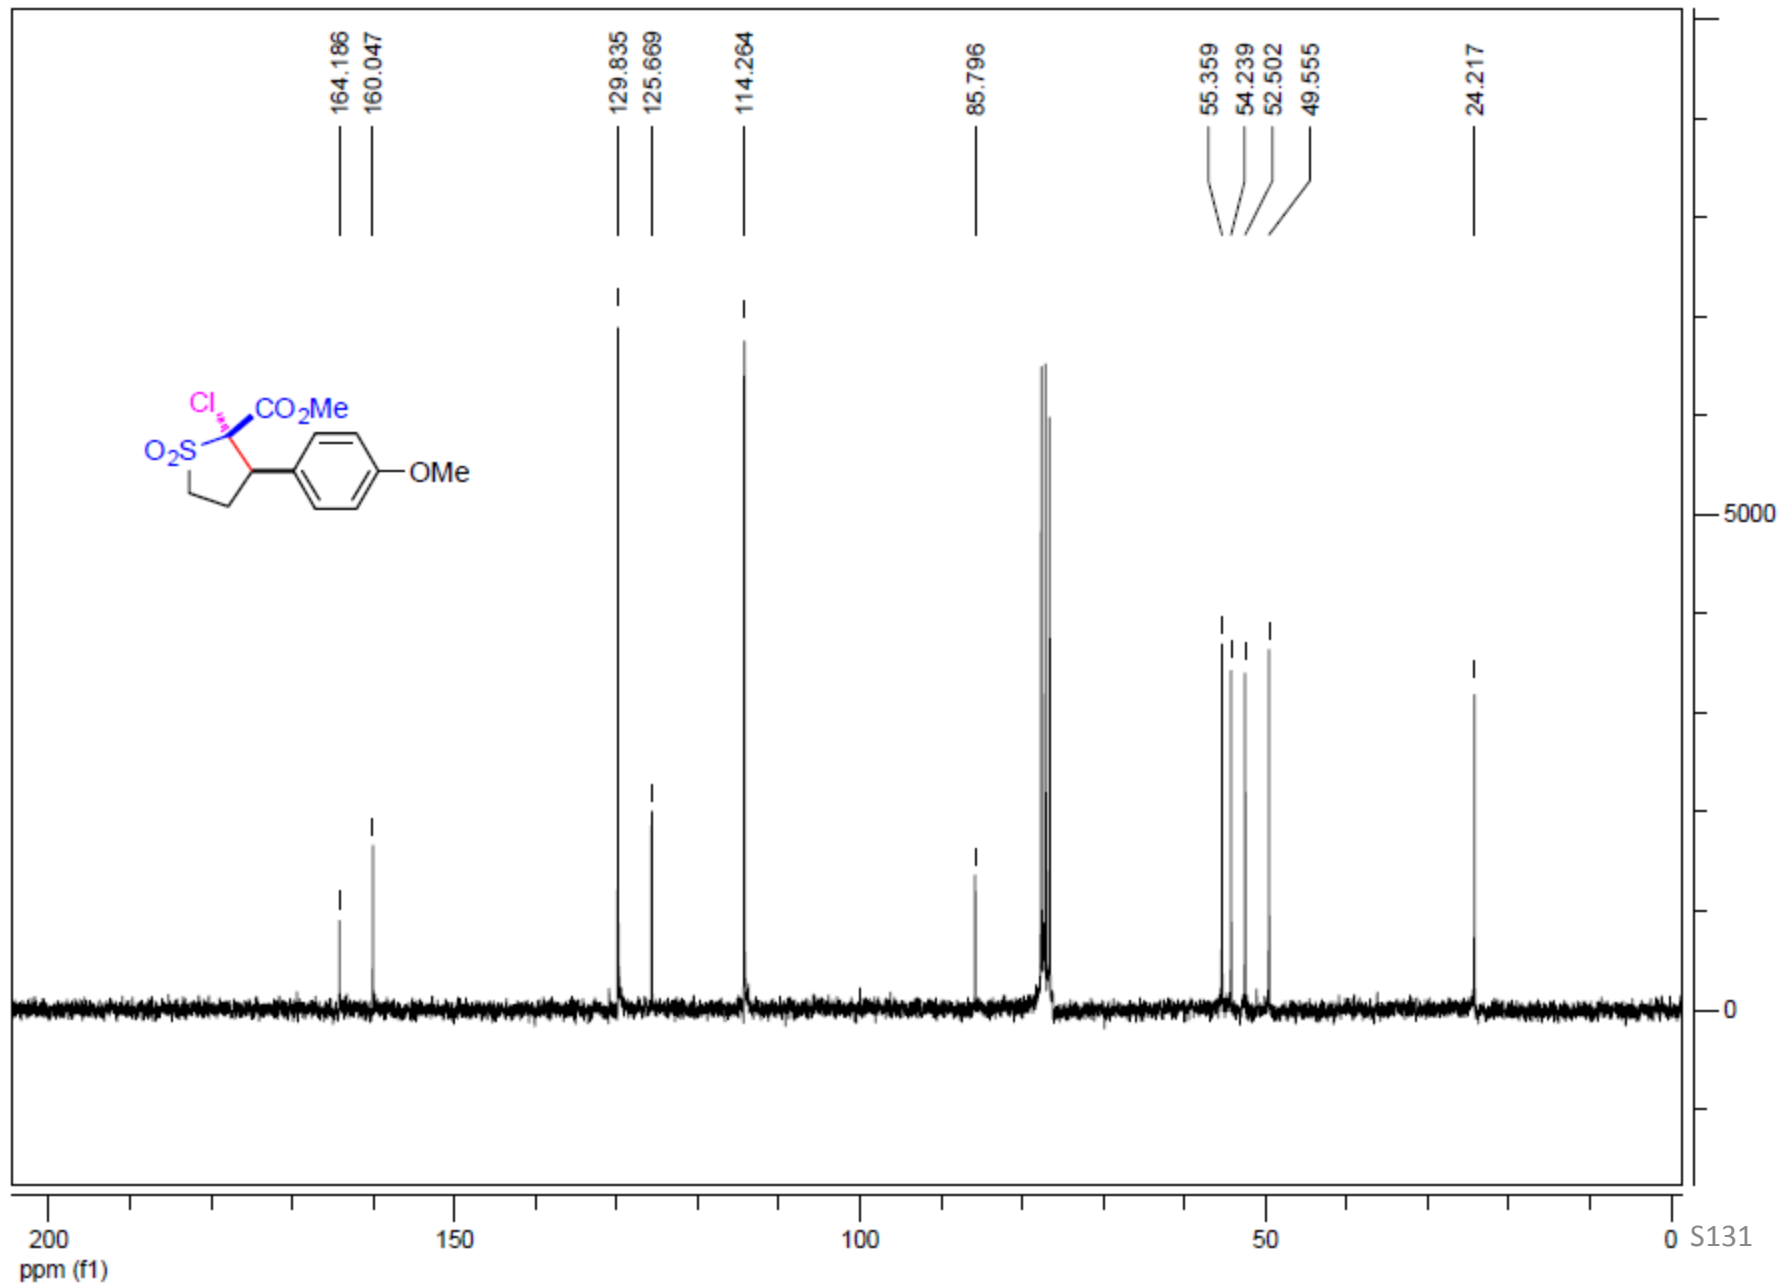



methyl 2-chloro-3-(4-methoxyphenyl)tetrahydrothiophene-2-carboxylate 1,1-dioxide  
**(3ib)**

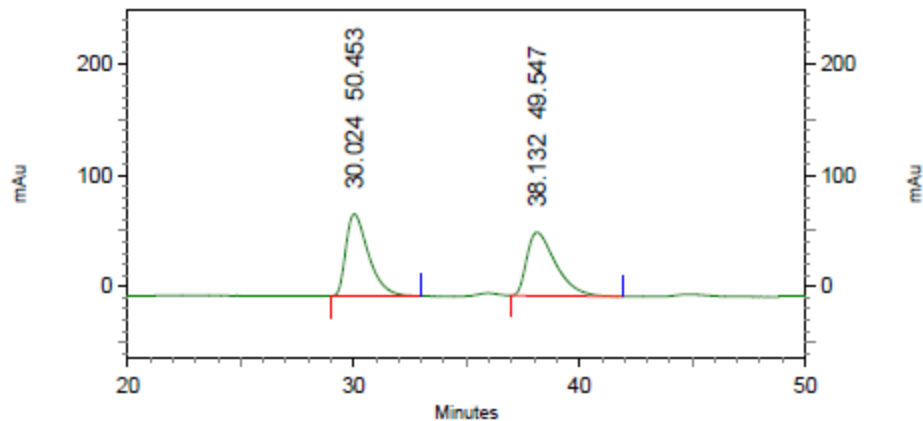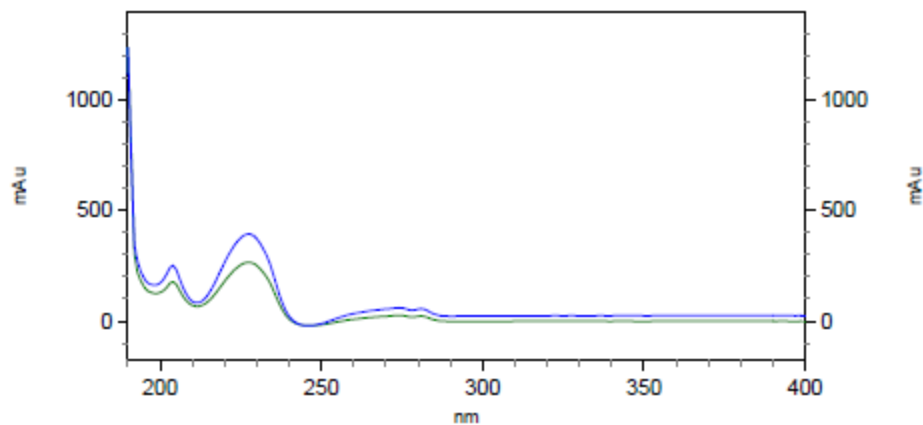

6: 232 nm, 4 nm

Results

| Name | Retention Time | Area Percent | Pk # |
|------|----------------|--------------|------|
|      | 30.024         | 50.453       | 1    |
|      | 38.132         | 49.547       | 2    |

|        |  |         |  |
|--------|--|---------|--|
| Totals |  | 100.000 |  |
|--------|--|---------|--|

methyl 2-chloro-3-(4-methoxyphenyl)tetrahydrothiophene-2-carboxylate 1,1-dioxide  
**(3ib)**

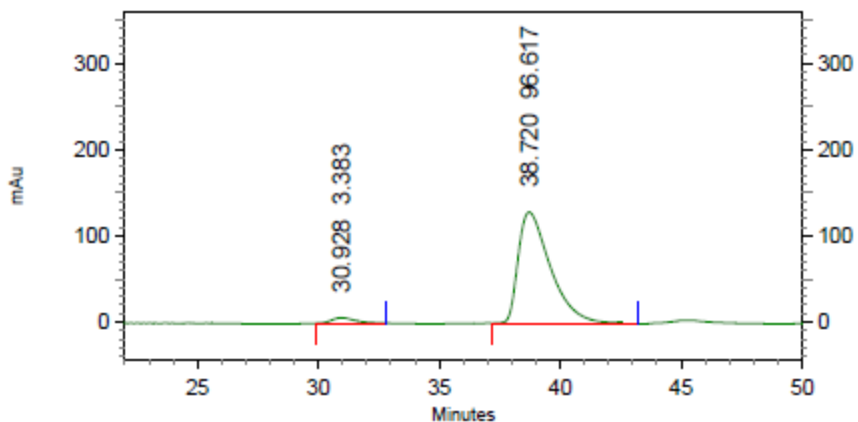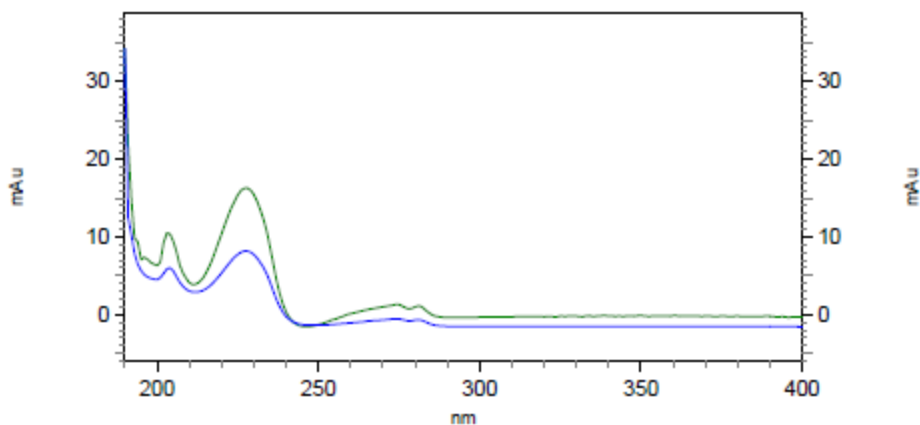

6: 232 nm, 4 nm

Results

| Name | Retention Time | Area Percent | Pk # |
|------|----------------|--------------|------|
|      | 30.928         | 3.383        | 1    |
|      | 38.720         | 96.617       | 2    |

|        |         |  |
|--------|---------|--|
| Totals | 100.000 |  |
|--------|---------|--|

methyl 3-(4-methoxyphenyl)-2-methyltetrahydrothiophene-2-carboxylate 1,1-dioxide  
(3ic)

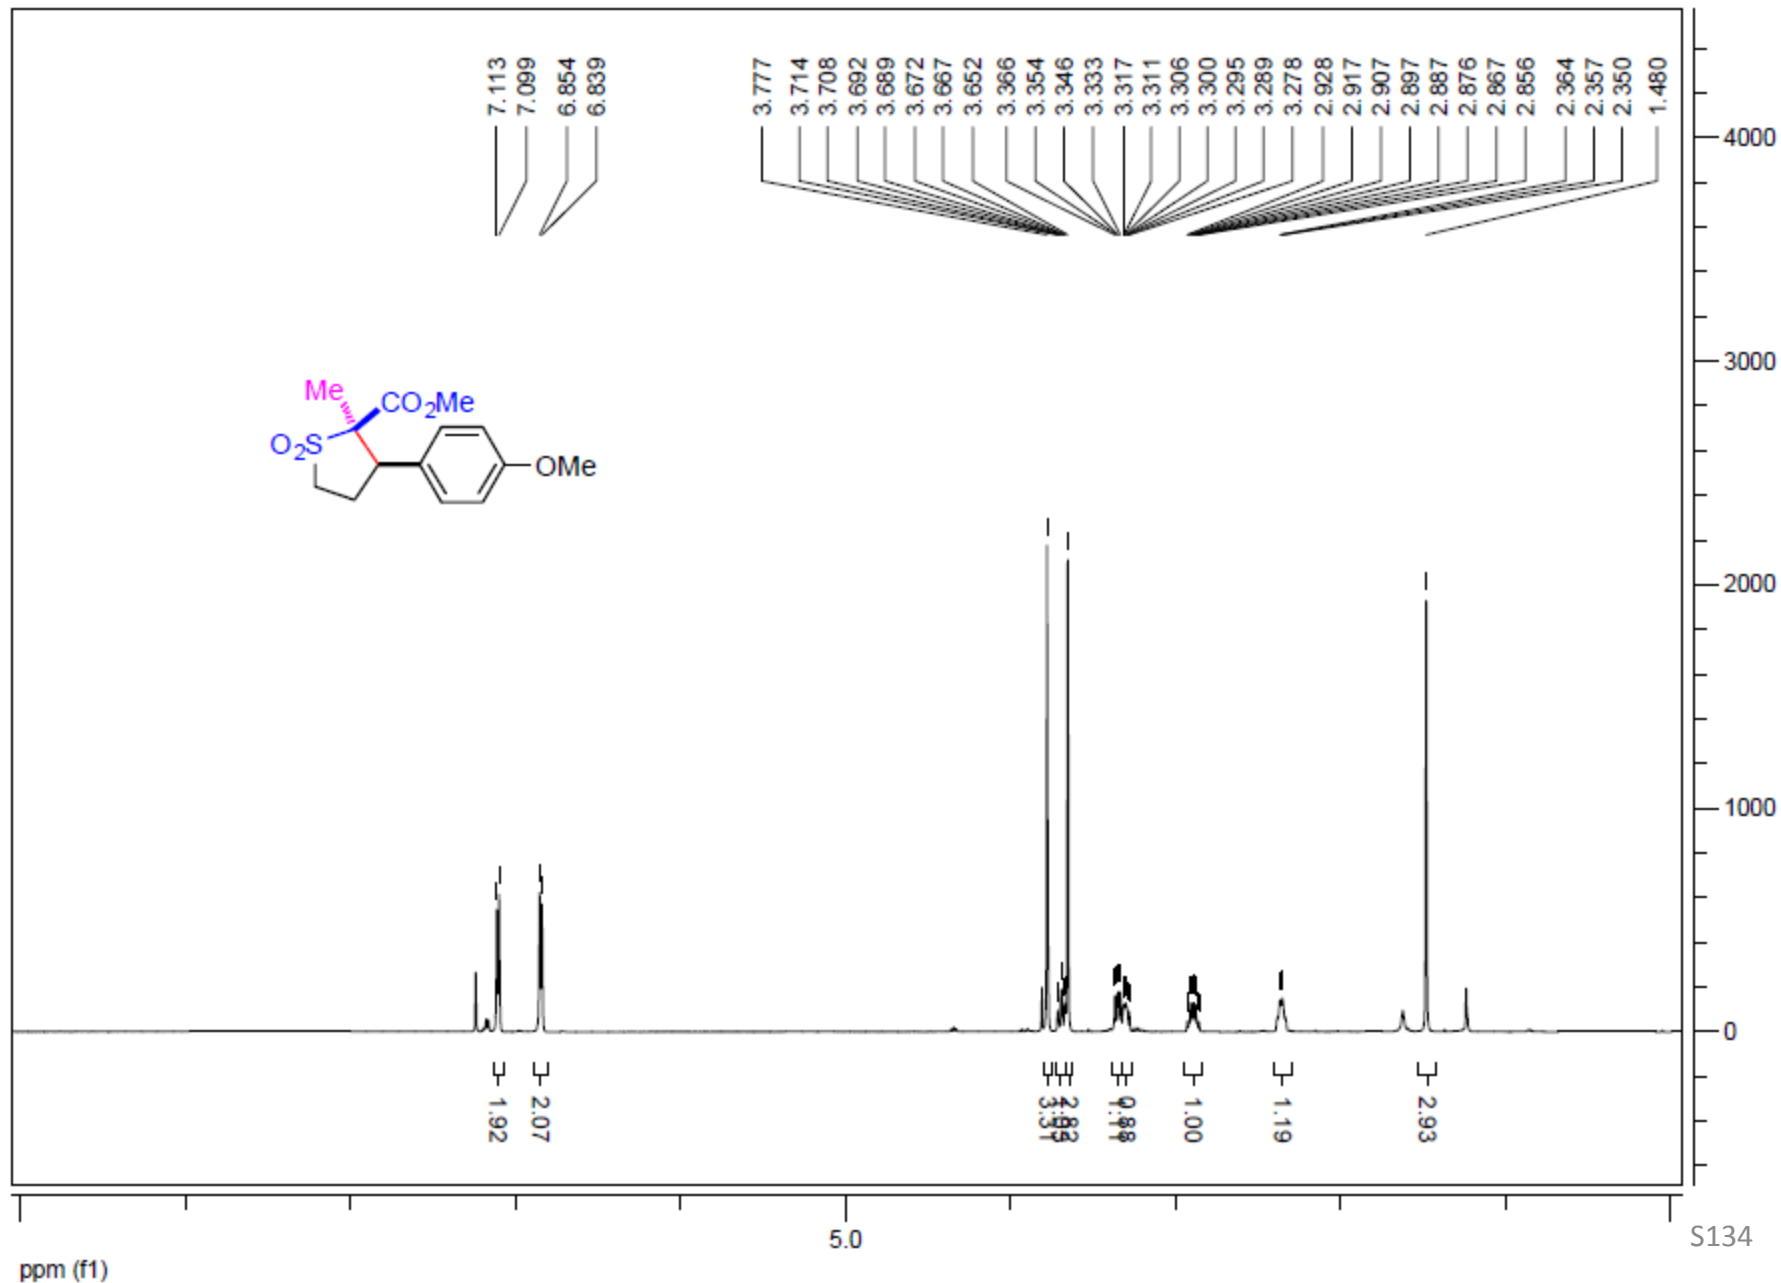

methyl 3-(4-methoxyphenyl)-2-methyltetrahydrothiophene-2-carboxylate 1,1-dioxide  
**(3ic)**

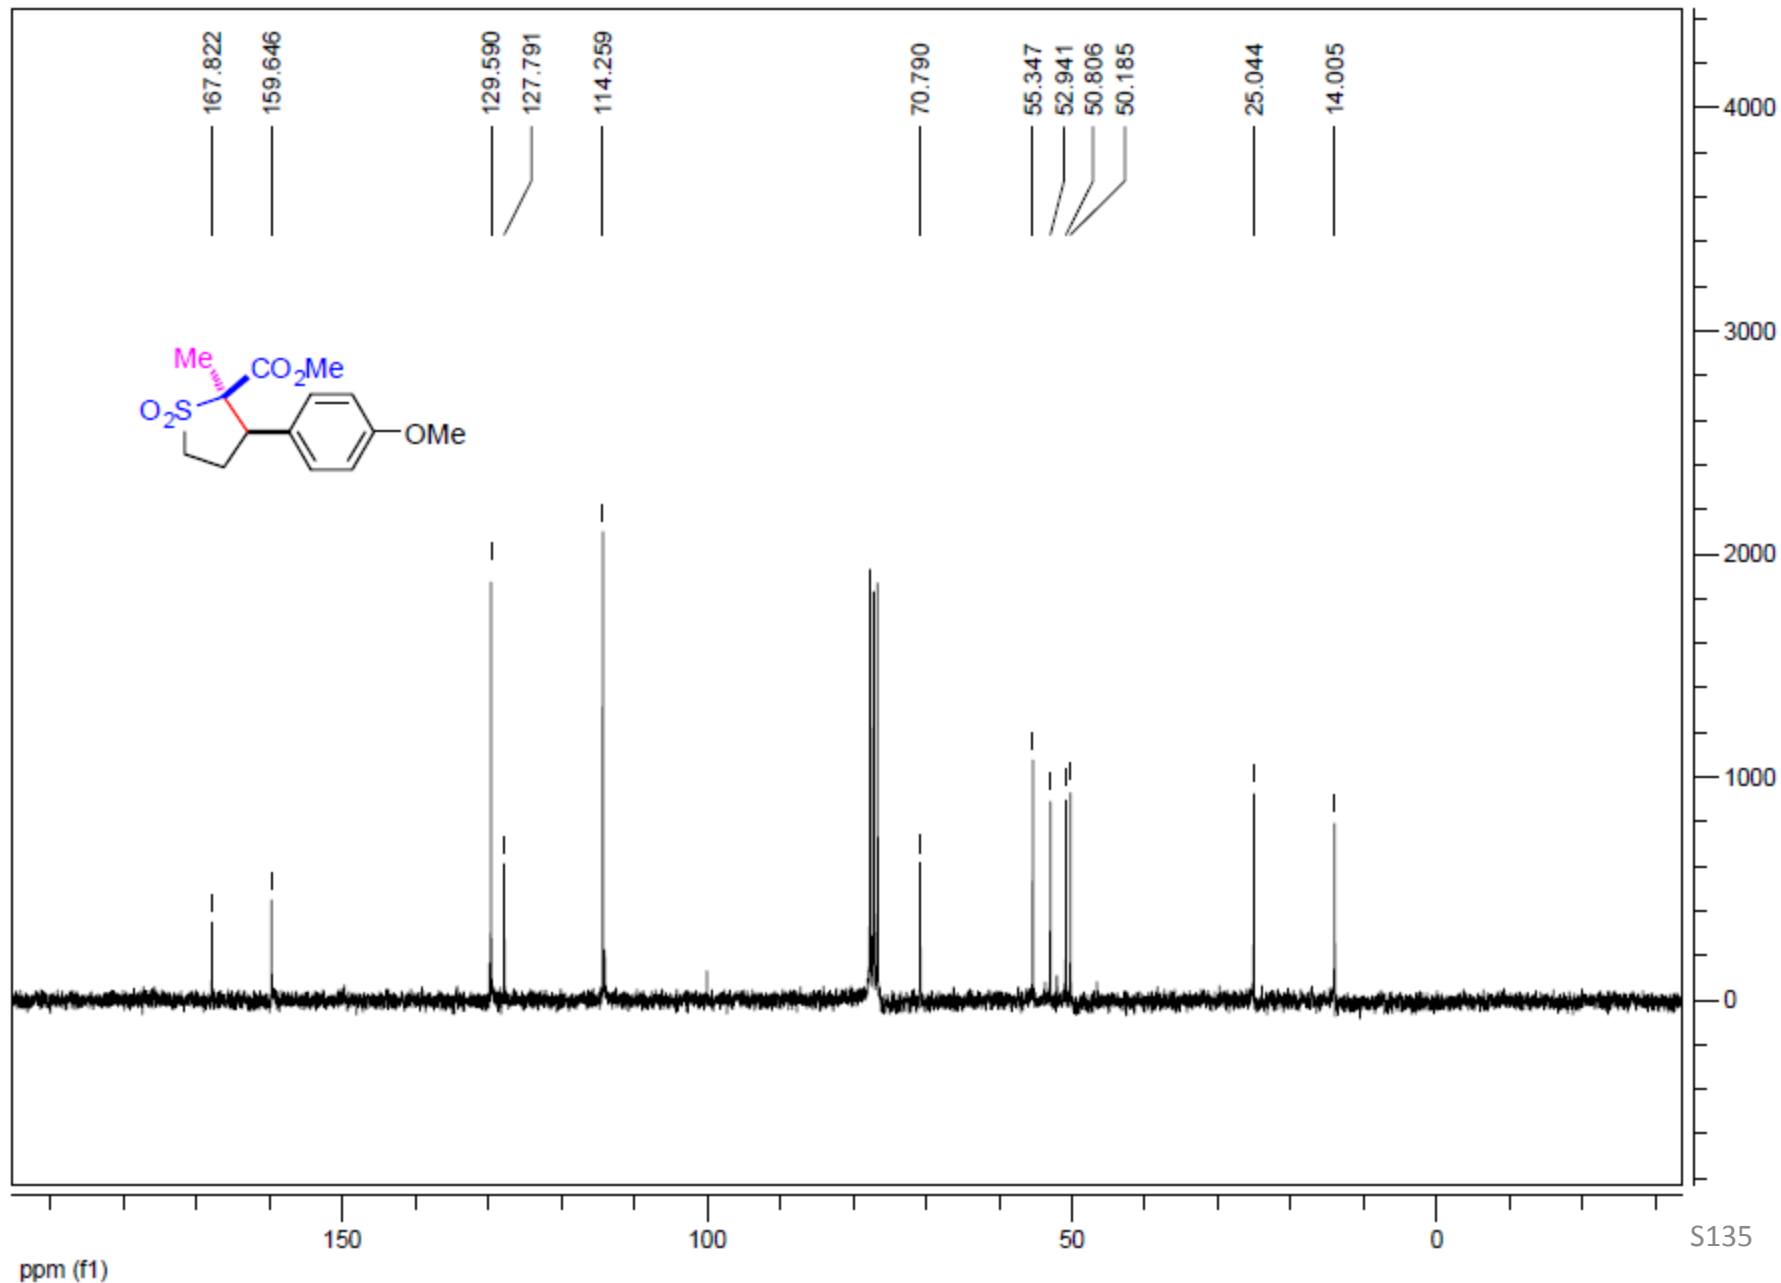

methyl 3-(4-methoxyphenyl)-2-methyltetrahydrothiophene-2-carboxylate 1,1-dioxide  
**(3ic)**

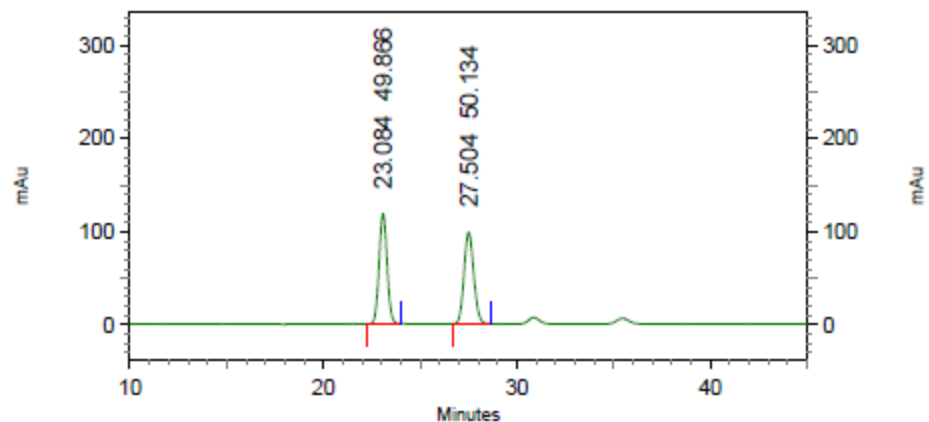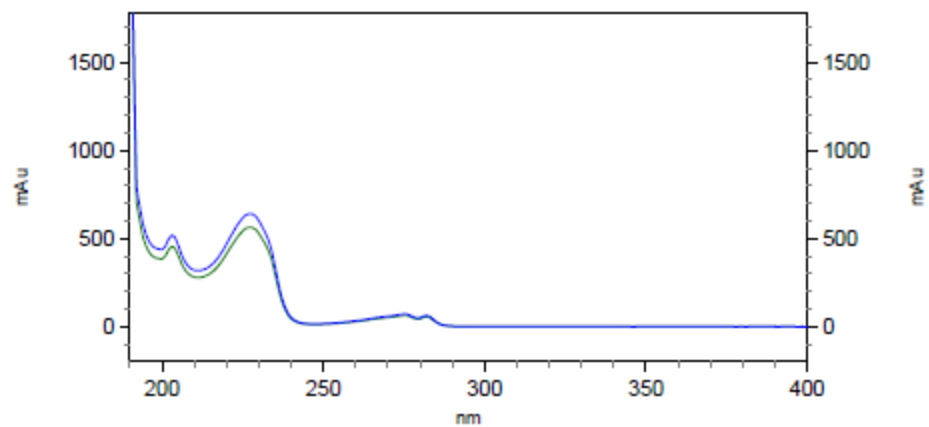

4: 229 nm, 4 nm

Results

| Name | Retention Time | Area Percent | Pk # |
|------|----------------|--------------|------|
|      | 23.084         | 49.866       | 1    |
|      | 27.504         | 50.134       | 2    |

|        |  |         |  |
|--------|--|---------|--|
| Totals |  | 100.000 |  |
|--------|--|---------|--|

methyl 3-(4-methoxyphenyl)-2-methyltetrahydrothiophene-2-carboxylate 1,1-dioxide  
**(3ic)**

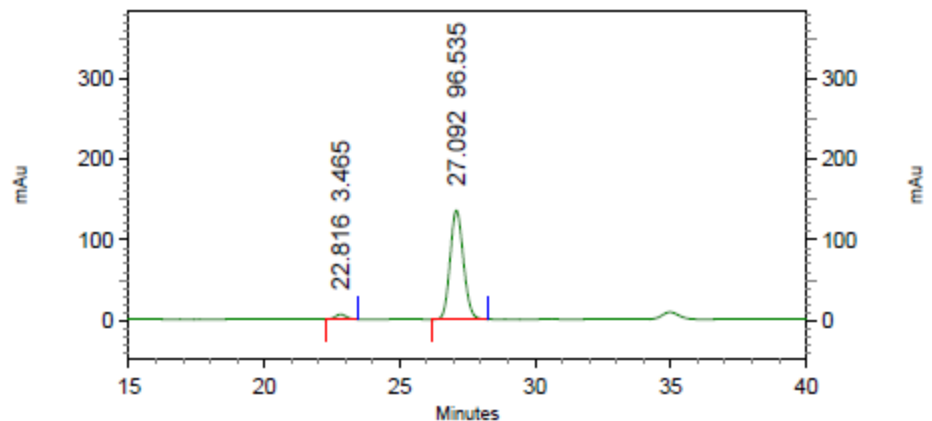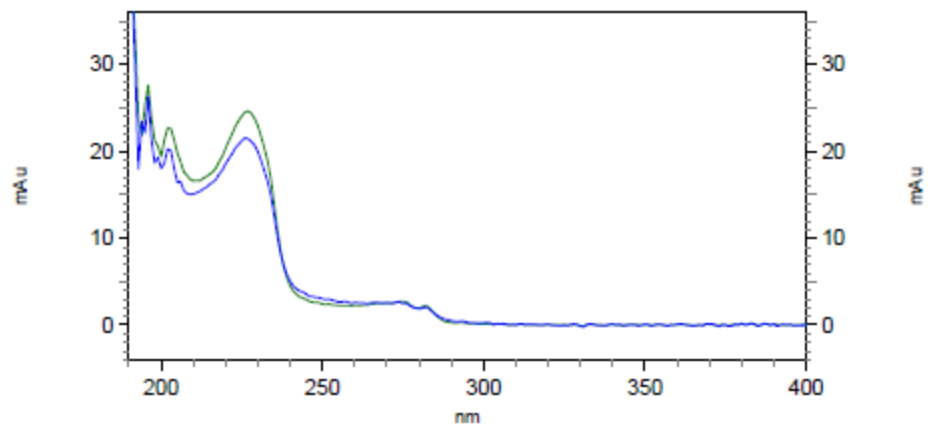

4: 229 nm, 4 nm

Results

| Name | Retention Time | Area Percent | Pk # |
|------|----------------|--------------|------|
|      | 22.816         | 3.465        | 1    |
|      | 27.092         | 96.535       | 2    |

|        |  |         |  |
|--------|--|---------|--|
| Totals |  | 100.000 |  |
|--------|--|---------|--|



methyl 2-(3-ethoxy-3-oxopropyl)-3-(4-methoxyphenyl)tetrahydrothiophene-2-carboxylate 1,1-dioxide (**3id**)

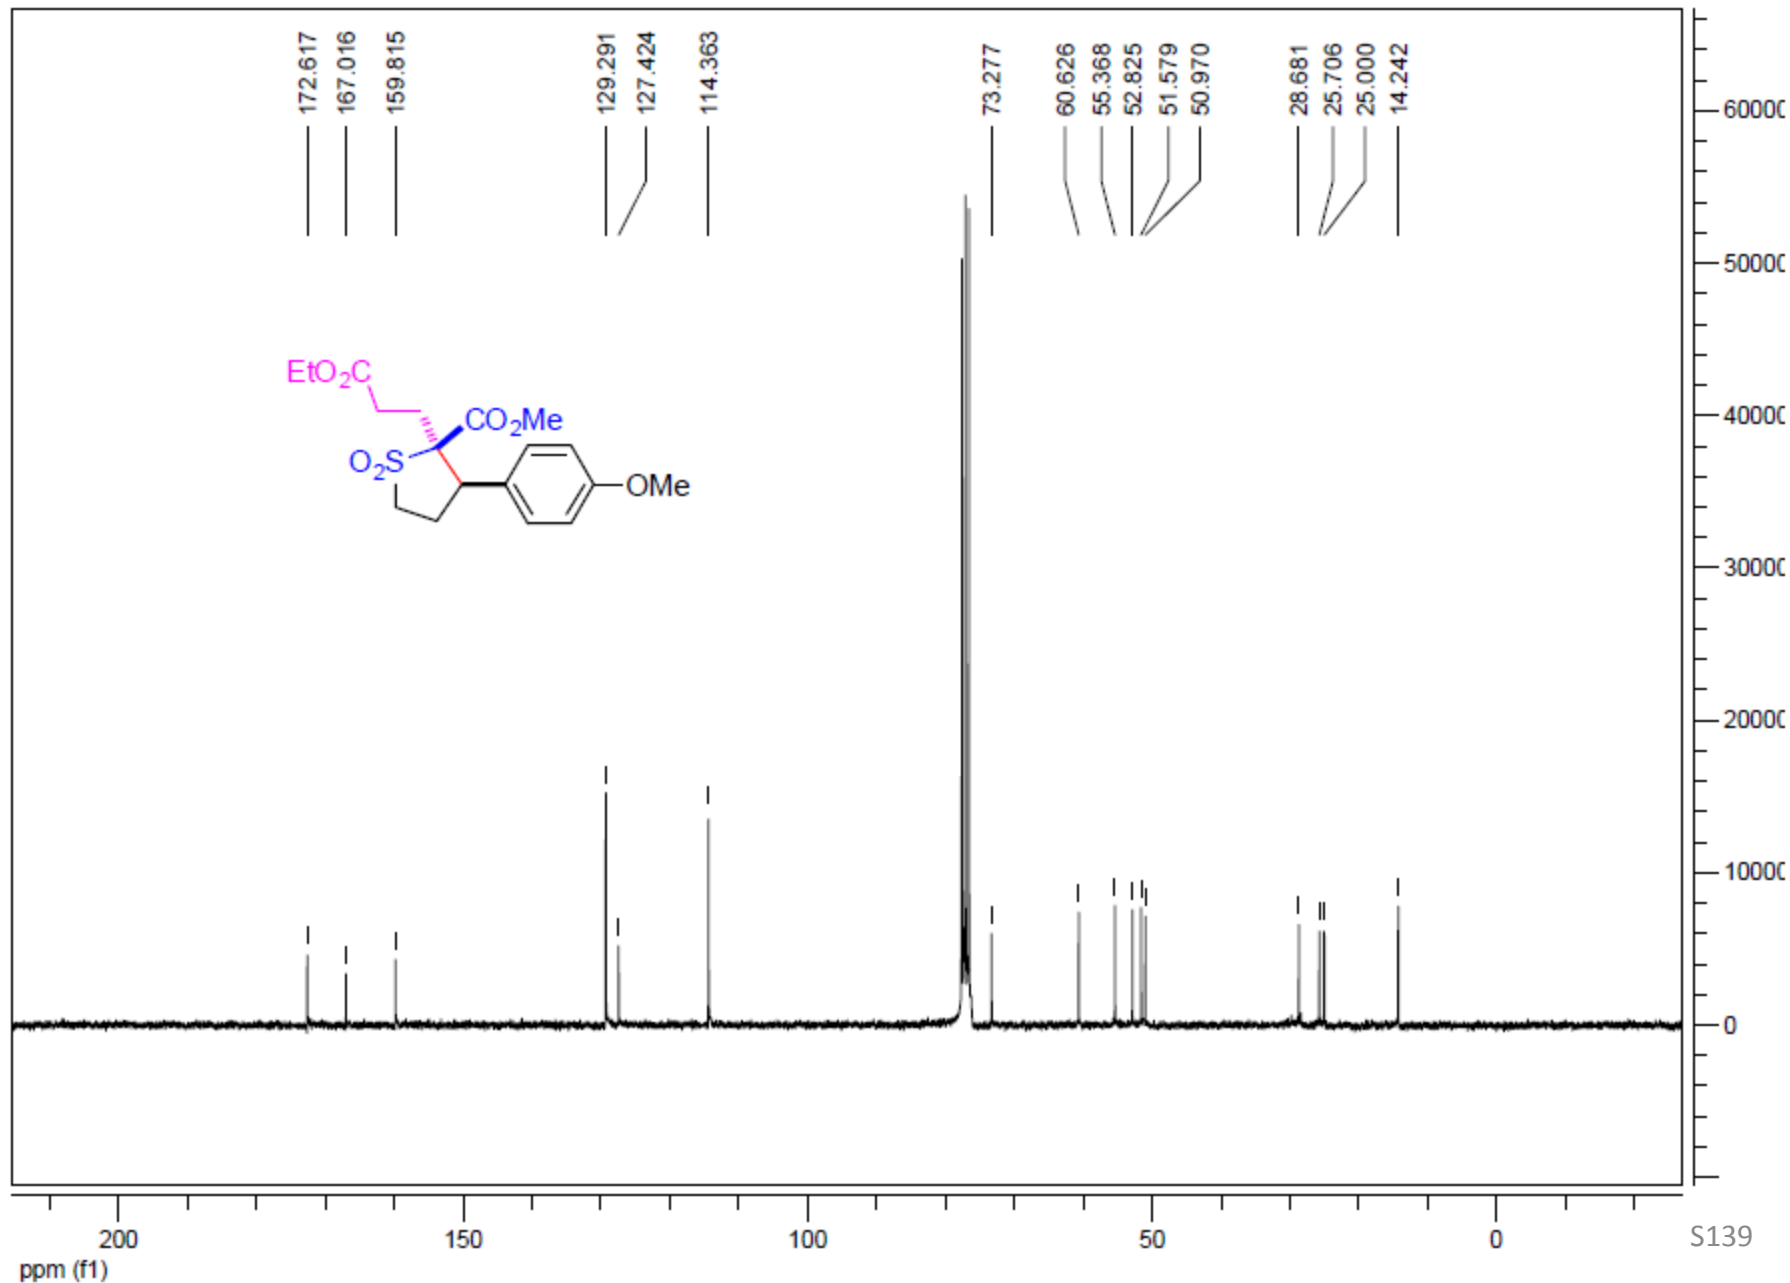



methyl 2-(3-ethoxy-3-oxopropyl)-3-(4-methoxyphenyl)tetrahydrothiophene-2-carboxylate 1,1-dioxide (**3id**)

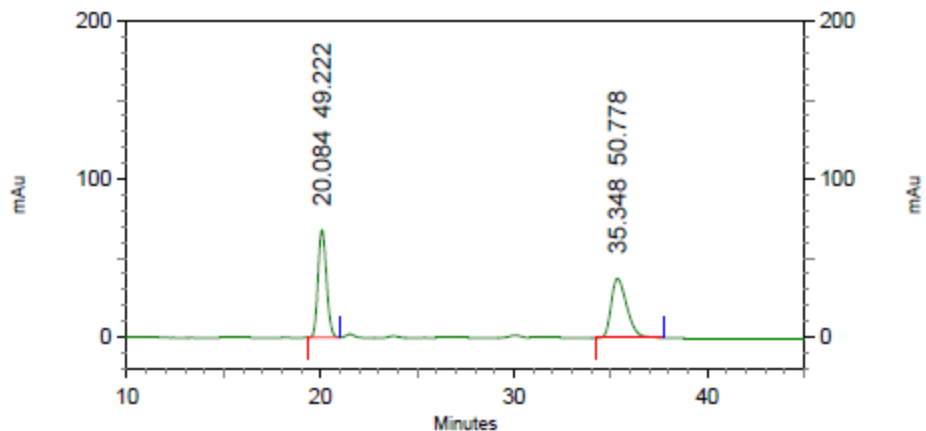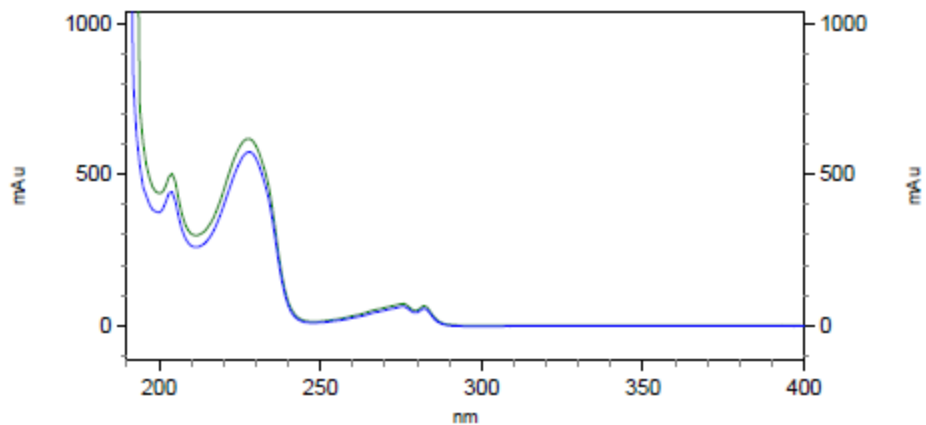

3: 237 nm, 4 nm

Results

| Name | Retention Time | Area Percent | Pk # |
|------|----------------|--------------|------|
|      | 20.084         | 49.222       | 1    |
|      | 35.348         | 50.778       | 2    |

|        |  |         |  |
|--------|--|---------|--|
| Totals |  | 100.000 |  |
|--------|--|---------|--|

methyl 2-(3-ethoxy-3-oxopropyl)-3-(4-methoxyphenyl)tetrahydrothiophene-2-carboxylate 1,1-dioxide (**3id**)

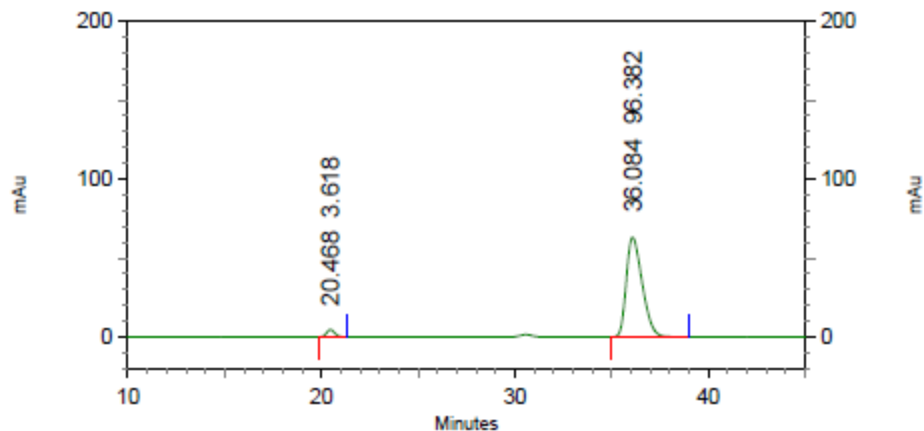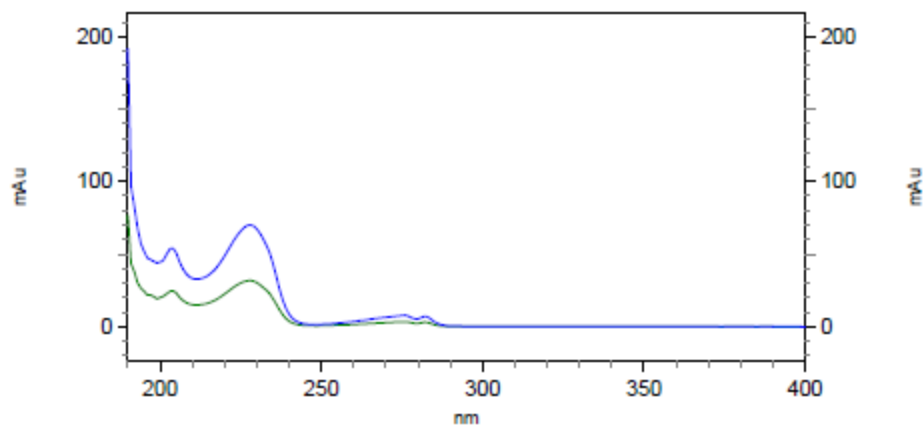

3: 229 nm, 4 nm

Results

| Name | Retention Time | Area Percent | Pk # |
|------|----------------|--------------|------|
|      | 20.468         | 3.618        | 1    |
|      | 36.084         | 96.382       | 2    |

|        |  |         |  |
|--------|--|---------|--|
| Totals |  | 100.000 |  |
|--------|--|---------|--|
